# Supplementary material for: Sub-optimal phenotypes of double-knockout mutants of Escherichia coli depend on the order of gene deletions
Source: Royal Society of Chemistry journal article supplement (doi:10.1039/c5ib00096c), 2015-01-01
Supplement: c5ib00096c2.xlsx [file c5ib00096c2.xlsx]

## Sheet: 2015.01.26 NC_000913_transcript
Transcription Start	Translation Start	Translation Stop	Transcription Stop	Strand	Name	Synonym	Product	Expression WT	Expression aceA	Expression aceApgi	Expression pgi	Expression pgiaceA	aceApgi/pgiaceA fold change	qValue aceApgi vs pgiaceA	qValue aceApgi vs WT	qValue aceApgi vs aceA	qValue aceApgi vs pgi	qValue pgiaceA vs WT	qValue pgiaceA vs aceA	qValue pgiaceA vs pgi	qValue WT vs aceA	qValue WT vs pgi	qValue aceA vs pgi	MIN q
4235540			4235434	-	-	predicted RNA	-	137	161	20	43	942	0.0212314	0	1.5455e-06	2.30356e-42	0.125073	0.862107	0.000113938	0	1	0.0872694	1.52459e-15	0	0.850932
4235434			4235538	+	-	predicted RNA	-	105	163	23	37	892	0.0257848	0	0.0415888	1.66658e-26	0.611267	0.907263	0.000417553	0	1	0.287502	2.59621e-22	0
4222487	4222487	4220301	4218389	-	arpA	b4017	ankyrin repeat protein	28	27	53	33	1	53	0	0.0929997	0.501225	0.143555	3.62186e-154	0	0	1	1	0.536195	0
4227603	4227731	4229362	4230094	+	yjbB	b4020	putative Na+/Pi-cotransporter	72	41	75	59	2	37.5	0	0.333736	0.463831	0.392766	0	0	0	1	1	0.937026	0
4230354	4230354	4231226	4231319	+	rluF	b4022	23S rRNA pseudouridine(2604) synthase	72	60	75	68	1	75	0	0.34159	0.575211	0.606036	0	0	0	1	1	0.443682	0
4223636	4223628	4222804	4222775	-	iclR	b4018	transcriptional repressor	76	144	74	107	3	24.6667	0	0.368054	0.10709	0.5499	4.60631e-147	0	0	1	1	0.314481	0
4230142	4230142	4229453	4229333	-	pepE	b4021	(alpha)-aspartyl dipeptidase	55	35	59	50	2	29.5	0	0.421187	0.935058	0.363877	3.16498e-199	4.10469e-287	0	1	1	0.510914	0
4232019			4233419	+	-	predicted RNA	antisense: lysC	334	296	264	614	5	52.8	0	0.492575	0.589767	0.753312	0	0	0	1	1	0.992961	0
4231883	4231631	4231359	4231234	-	yjbD	b4023	DUF3811 family protein	46	114	79	129	1	79	0	0.500999	0.381769	0.716613	9.74867e-44	0	0	1	1	0.423764	0
4233527	4233233	4231884	4231884	-	lysC	b4024	lysine-sensitive aspartokinase 3	301	274	243	559	4	60.75	0	0.517155	0.593745	0.741626	0	0	0	1	1	0.980842	0
4223812	4223828	4227511	4227547	+	metH	b4019	homocysteine-N5-methyltetrahydrofolate transmethylase, B12-dependent	108	116	94	113	3	31.3333	0	0.57898	0.584199	0.595448	2.70762e-267	0	0	1	1	0.689854	0
4218414	4218596	4220332	4220568	+	aceK	b4016	isocitrate dehydrogenase kinase/phosphatase	123	116	85	430	2	42.5	0	0.866638	0.48623	8.36868e-05	0	0	0	1	1	0.0390629	0
	4233758	4235407		+	pgi	b4025	glucosephosphate isomerase	204	216	1	0	7	0.142857	2.45688e-28	0	0	1.72187e-17	6.85689e-280	0	0	1	0	1	0
4217080	4217109	4218413	4218413	+	aceA	b4015	isocitrate lyase	915	6	2	3417	15	0.133333	3.14678e-11	0	0.0590425	0	0	0.396924	0	0	0.0409339	0	0
4591863			4591773	-	-	predicted RNA	antisense: tsr	362	507	31	57	15	2.06667	0.22616	1.26595e-17	3.09715e-160	0.474139	2.70945e-141	0	6.13339e-06	1	4.54817e-12	5.47407e-115	0
4592035			4591915	-	-	predicted RNA	antisense: tsr	411	556	37	60	21	1.7619	0.553434	1.0872e-15	5.59396e-134	0.63932	1.0531e-88	0	0.00657242	1	4.24766e-13	3.93853e-114	0
985887			985868	-	-	predicted RNA	-	2569	3863	99	913	188	0.526596	0.553847	1.07674e-180	0	5.81591e-63	1.78312e-45	0	1.57025e-14	1	0.565039	2.43138e-16	0
2001938			2003663	+	-	predicted RNA	antisense: fliC	6670	9016	87	1596	125	0.696	1	0	0	2.26149e-101	7.00263e-137	0	6.44179e-19	1	1	0.0197294	0
2003607	2003606	2002110	2002044	-	fliC	b1923	flagellar filament structural protein (flagellin)	7466	10074	92	1766	137	0.671533	1	0	0	2.10957e-143	1.24686e-163	0	5.07844e-22	1	1	0.0152241	0
2002043			2001938	-	-	predicted RNA	-	2462	2540	56	704	54	1.03704	1	1.76297e-304	0	2.59468e-65	0	0	1.51893e-138	1	0.516629	5.77235e-07	0
2003663			2003608	-	-	predicted RNA	-	3166	4355	118	737	127	0.929134	1	3.92628e-83	0	4.23231e-10	6.85217e-173	0	3.41219e-21	1	0.0118852	1.49202e-29	0
77367			77593	+	sgrS	b4577	-	53	76	3291	16190	4196	0.784318	1	6.41294e-72	0	0.212073	1.52004e-73	0	0.940264	1	2.0432e-81	0	0
	77388	77519	77544	+	sgrT	b4662	inhibitor of glucose uptake	59	99	4619	22874	5901	0.782749	1	1.52834e-46	0	0.740618	1.08919e-47	0	0.882606	1	2.4589e-53	0	0
987082	986982	985894	985888	-	ompF	b0929	outer membrane porin 1a (Ia;b;F)	4982	7230	183	1619	327	0.559633	1	3.56751e-42	0	1.15481e-11	0.00098075	5.37573e-40	0.316654	1	1	0.11953	0
985868			987079	+	-	predicted RNA	antisense: ompF	4695	6674	174	1542	302	0.576159	1	1.13552e-38	0	5.8559e-11	0.000671391	1.38256e-39	0.28431	1	1	0.135108	0
77545			77571	+	-	predicted RNA	-	42	34	898	3395	1071	0.838469	1	1.10313e-05	7.12259e-260	0.000727265	5.19676e-07	0	0.000234146	1	3.38003e-07	0	0
1975333			1975373	+	-	predicted RNA	antisense: motB	290	610	48	124	32	1.5	1	1.8392e-05	5.78435e-139	0.00971255	1.3198e-13	0	2.22726e-06	1	1	1.8575e-27	0
3941684			3941531	-	-	predicted RNA	-	194	921	34	77	45	0.755556	1	0.00755623	0	0.196719	0.014574	0	0.561985	3.43174e-08	1	1.14727e-207	0
1967178			1967191	+	-	predicted RNA	antisense: cheY	321	538	74	117	71	1.04225	0.208227	0.00755623	9.7507e-44	0.924148	1.73218e-22	2.24267e-304	0.000383228	1	0.000197629	5.97169e-74	2.24267e-304
1130128	1130128	1129835	1129831	-	flgM	b1071	anti-sigma factor for FliA (sigma 28)	591	802	52	206	49	1.06122	1	6.2967e-11	7.99992e-95	0.00109473	8.0867e-36	1.22788e-297	5.52216e-11	1	1	3.38112e-09	1.22788e-297
1967297			1967307	+	-	predicted RNA	antisense: cheY	340	534	87	109	69	1.26087	0.0119614	0.0403963	1.10415e-27	0.0209163	6.64023e-26	3.78068e-297	0.268982	1	1.40417e-20	6.77302e-245	3.78068e-297
1977265			1977218	-	-	predicted RNA	-	261	697	50	151	40	1.25	1	0.00767307	4.53526e-131	0.0045082	1.21234e-06	2.96414e-290	1.62905e-06	1	1	3.2091e-22	2.96414e-290
1129524			1130104	+	-	predicted RNA	antisense: flgN flgM	591	883	55	220	51	1.07843	1	5.48572e-12	4.12472e-131	6.91566e-05	6.17912e-26	3.06212e-272	1.25166e-09	1	1	4.95843e-06	3.06212e-272
33438			33429	-	-	predicted RNA	antisense: carB	362	574	86	121	108	0.796296	1	0.000457278	2.93929e-53	0.173624	2.76969e-07	9.71218e-92	0.41381	1	2.38681e-20	1.22069e-246	1.22069e-246
4591645	4591657	4593312	4593476	+	tsr	b4355	methyl-accepting chemotaxis protein I, serine sensor receptor	429	604	56	82	37	1.51351	0.938112	2.22363e-06	2.06034e-62	0.386848	9.61135e-26	2.14194e-234	0.0617112	1	0.0872694	5.86129e-23	2.14194e-234
1972301			1972566	+	-	predicted RNA	antisense: tar	514	572	49	149	42	1.16667	1	1.48023e-08	2.6281e-48	0.0452314	2.30863e-35	1.3787e-185	1.67633e-06	1	0.183595	5.25003e-11	1.3787e-185
1974868			1974891	+	-	predicted RNA	antisense: cheA	344	584	62	135	48	1.29167	1	2.69512e-06	4.64608e-97	0.0400152	3.59649e-12	8.55794e-178	0.000911631	1	0.160634	7.10191e-32	8.55794e-178
597039			597130	+	-	predicted RNA	-	491	779	48	153	65	0.738462	1	2.15725e-13	6.83046e-166	0.0040213	8.86577e-10	3.06099e-115	0.121625	1	0.140276	1.14666e-27	6.83046e-166
697047			696963	-	leuW	b0672	Leu tRNA	863	3336	208	552	248	0.83871	1	0.268683	1.80806e-109	0.0962953	0.221082	4.73114e-164	0.094219	1	1	4.963e-29	4.73114e-164
3719947	3720049	3720261	3720261	+	cspA	b3556	RNA chaperone and antiterminator, cold-inducible	240	13911	1482	5451	2055	0.721168	1	1.10582e-25	1.6633e-06	0.240505	1.20033e-55	0.0182715	0.841083	1.29026e-162	5.8538e-108	0.890057	1.29026e-162
1131435	1131438	1131842	1131842	+	flgC	b1074	flagellar component of cell-proximal portion of basal-body rod	668	1067	90	293	79	1.13924	1	2.83758e-05	2.53778e-68	0.00253787	1.40524e-12	5.18893e-157	1.01735e-06	1	1	3.53299e-05	5.18893e-157
1131843	1131854	1132549	1132573	+	flgD	b1075	flagellar hook assembly protein	709	1212	98	316	89	1.10112	1	8.96721e-06	1.85844e-88	0.000990855	2.65512e-10	4.6303e-153	1.02396e-05	1	1	0.0104851	4.6303e-153
1132574	1132574	1133782	1133793	+	flgE	b1076	flagellar hook protein	701	1237	90	284	80	1.125	1	5.318e-06	1.53884e-99	0.00345868	1.81819e-09	4.09422e-152	0.000423981	1	1	0.0307733	4.09422e-152
780554			780629	+	lysT	b0743	Lys tRNA	1255	3871	208	802	339	0.613569	1	0.0249816	1.13014e-150	0.00155635	0.123242	9.99699e-107	0.049698	1	1	2.54838e-15	1.13014e-150
697133			697057	-	metT	b0673	Met tRNA	608	2212	158	400	182	0.868132	1	0.287687	6.28042e-73	0.172515	0.156328	4.5669e-149	0.0710296	1	1	1.68601e-26	4.5669e-149
1977217	1977139	1976252		-	motA	b1890	proton conductor component of flagella motor	342	736	63	179	55	1.14545	1	0.00767307	1.43106e-75	0.00599067	1.09876e-05	2.44142e-148	9.55401e-05	0.458946	1	9.03449e-05	2.44142e-148
4168474			4168251	-	-	predicted RNA	antisense: gltT	188	1178	87	211	92	0.945652	1	0.98899	2.1016e-74	0.154723	0.500702	2.23103e-146	0.0639597	1	1	9.7574e-24	2.23103e-146
2001805	2001789	2001070	2001070	-	fliA	b1922	RNA polymerase, sigma 28 (sigma F) factor	561	802	65	218	61	1.06557	1	2.91706e-08	2.08619e-83	0.000677955	6.11052e-15	1.40665e-144	5.14308e-06	1	1	0.000845918	1.40665e-144
1976602			1977280	+	-	predicted RNA	antisense: flhC motA	343	803	62	186	61	1.01639	1	0.00753207	1.38296e-91	0.00471221	0.000188377	1.00917e-140	0.000650112	0.532669	1	2.51044e-07	1.00917e-140
1975900			1976464	+	-	predicted RNA	antisense: motB motA	280	655	57	155	50	1.14	1	0.0740921	1.82918e-59	0.0317942	0.00027734	2.58836e-140	0.000533639	1	0.607075	3.91419e-09	2.58836e-140
1140950			1139852	-	-	predicted RNA	antisense: flgL flgK	493	741	69	175	58	1.18966	1	1.6059e-05	2.65144e-63	0.0183818	4.73819e-12	5.80493e-132	0.000661925	1	1	0.000482471	5.80493e-132
4168372			4168447	+	gltT	b3969	Glu tRNA	163	1093	92	218	90	1.02222	1	0.6485	2.64669e-47	0.302598	0.642873	4.13641e-128	0.0576364	0.780616	1	7.81422e-26	4.13641e-128
1134715			1134680	-	-	predicted RNA	-	263	542	52	119	44	1.18182	1	0.000938433	8.83608e-93	0.0413925	5.11885e-05	5.21733e-122	0.0256594	1	1	4.53048e-25	5.21733e-122
1140028	1140033	1140986	1140986	+	flgL	b1083	flagellar hook-filament junction protein	507	744	72	185	61	1.18033	1	2.4234e-05	2.49012e-57	0.0163576	1.007e-11	2.11988e-120	0.000533639	1	1	0.000528898	2.11988e-120
696939			696865	-	glnU	b0670	Gln tRNA	675	2399	182	406	210	0.866667	1	0.323196	2.01288e-65	0.295778	0.264068	9.62753e-120	0.277011	1	1	5.65716e-31	9.62753e-120
596216			596197	-	-	predicted RNA	antisense: cusC	288	578	52	204	100	0.52	0.256579	2.69845e-05	1.66469e-119	7.05258e-09	0.389648	4.08056e-18	0.483432	1	1	2.15158e-08	1.66469e-119
3720295			3719900	-	-	predicted RNA	antisense: cspA	247	12056	1280	5025	1876	0.682303	1	1.57335e-21	0.00292929	0.840338	1.90185e-38	0.148752	0.859131	3.70101e-115	7.32058e-93	0.946796	3.70101e-115
2000963			2001778	+	-	predicted RNA	antisense: fliZ fliA	520	754	67	217	63	1.06349	1	1.60851e-06	1.75e-68	0.00113765	2.11991e-11	4.94574e-114	1.90272e-05	1	1	0.00708837	4.94574e-114
2729343			2729558	+	-	predicted RNA	antisense: gltW	183	1053	87	206	91	0.956044	1	0.896836	6.92683e-56	0.194929	0.505108	2.36882e-113	0.0847382	1	1	3.63988e-20	2.36882e-113
1131009	1131018	1131434	1131434	+	flgB	b1073	flagellar component of cell-proximal portion of basal-body rod	627	891	82	255	76	1.07895	1	1.7932e-05	6.34645e-54	0.00621234	6.84917e-12	4.07402e-112	3.64981e-05	1	1	3.88691e-05	4.07402e-112
2729444			2729369	-	gltW	b2590	Glu tRNA	170	1016	89	210	88	1.01136	1	0.654163	1.13022e-44	0.297668	0.510404	7.0893e-112	0.0770507	1	1	4.22676e-24	7.0893e-112
1015703	1015715	1015882	1015882	+	rmf	b0953	ribosome modulation factor	195	545	1539	4289	1620	0.95	1	1.55317e-31	0.0786626	0.289653	6.80039e-46	0.0580314	0.955609	1	4.59198e-106	1.16883e-15	4.59198e-106
1133802	1133802	1134557	1134564	+	flgF	b1077	flagellar component of cell-proximal portion of basal-body rod	405	687	66	164	61	1.08197	1	0.00127315	7.5458e-55	0.033335	9.63796e-07	9.9283e-100	0.00514051	1	1	6.36525e-07	9.9283e-100
1134618			1134277	-	-	predicted RNA	antisense: flgF	388	668	61	153	61	1	1	0.00768632	2.02575e-46	0.114043	2.22758e-06	1.16794e-99	0.0185104	1	1	1.2976e-12	1.16794e-99
223631			223538	-	-	predicted RNA	-	200	507	40	61	28	1.42857	1	0.0248152	1.13888e-93	0.742472	2.40453e-08	3.88277E-318	0.200864	1	0.11166	5.41073e-91	1.13888e-93
1129830	1129830	1129414	1129175	-	flgN	b1070	export chaperone for FlgK and FlgL	502	780	78	219	71	1.09859	1	0.00137887	1.91662e-43	0.0227929	5.9107e-08	2.63836e-93	0.000569503	1	1	4.78319e-06	2.63836e-93
597131	597131	597463	597463	+	cusF	b0573	periplasmic copper- and silver-binding protein	603	925	65	187	86	0.755814	1	1.79353e-07	2.42995e-87	0.0364249	6.52872e-08	1.91838e-90	0.131054	1	0.706133	5.63897e-16	1.91838e-90
1139045			1138669	-	-	predicted RNA	antisense: flgK	279	572	63	115	55	1.14545	1	0.215466	3.45652e-31	0.479622	0.00098075	1.17998e-89	0.168681	1	1	5.74196e-19	1.17998e-89
2818645			2818553	-	serV	b2695	Ser tRNA	553	1630	171	346	163	1.04908	1	0.441143	1.72819e-31	0.410204	0.174363	1.70996e-89	0.125016	1	1	3.92088e-18	1.70996e-89
2005803			2005633	-	-	predicted RNA	antisense: fliS fliT	362	640	75	147	64	1.17188	1	0.187284	7.18176e-23	0.500569	3.63251e-05	1.56334e-88	0.0516515	1	1	2.97036e-15	1.56334e-88
3451374			3451365	-	-	predicted RNA	-	2468	3326	274	1207	580	0.472414	0.541503	3.95651e-10	7.55492e-88	4.3118e-07	0.0302879	1.30248e-20	0.294169	1	1	1.9193e-06	7.55492e-88
4013060			4012905	-	-	predicted RNA	antisense: metE	1063	1087	84	283	107	0.785047	1	8.37882e-14	3.14966e-61	0.0146714	1.74669e-20	8.82886e-88	0.00641856	1	0.100981	2.09003e-10	8.82886e-88
4209774			4209849	+	gltV	b4008	Glu tRNA	147	505	70	101	50	1.4	0.913974	0.941125	4.84029e-21	0.939027	0.332923	4.29305e-87	0.292908	1	1	3.49177e-27	4.29305e-87
1970746			1971217	+	-	predicted RNA	antisense: tar tap	463	706	79	202	67	1.1791	1	0.00424292	4.9082e-36	0.0383031	1.3154e-07	7.54308e-86	0.000810398	1	1	1.18718e-05	7.54308e-86
4037279			4037130	-	-	predicted RNA	antisense: ileT alaT	200	832	93	155	87	1.06897	1	0.861059	1.379e-26	0.75056	0.390522	2.05443e-85	0.385804	8.97833e-06	1	1.52997e-25	2.05443e-85
780843			780918	+	lysW	b0745	Lys tRNA	700	1797	139	365	188	0.739362	1	0.146225	1.64971e-59	0.146191	0.0628398	3.65374e-84	0.2344	1	1	2.09168e-20	3.65374e-84
4179804			4179884	+	-	predicted RNA	-	2659	4074	299	1290	475	0.629474	1	6.05532e-07	8.13415e-81	3.61266e-05	0.000132746	2.37454e-53	0.00437993	1	1	0.000355863	8.13415e-81
2818274			2818198	-	argY	b2693	Arg tRNA	350	1069	105	242	106	0.990566	1	0.325226	1.89235e-33	0.311845	0.235222	3.02358e-80	0.114521	0.08673	1	1.16448e-17	3.02358e-80
1735342	1735378	1735959	1736028	+	sodB	b1656	superoxide dismutase, Fe	409	523	58	109	51	1.13725	1	0.000180085	2.59748e-34	0.327234	7.05214e-11	8.43858e-80	0.152034	1	0.238532	1.28963e-14	8.43858e-80
4178413			4178444	+	-	predicted RNA	-	1098	1867	152	547	235	0.646809	1	2.13438e-05	1.30703e-79	0.000693409	0.00521409	2.34167e-46	0.0946869	1	1	3.93502e-10	1.30703e-79
2785837			2785762	-	ileY	b2652	Ile tRNA	10	28	50	17	23	2.17391	0.131268	0.834308	0.380689	5.87255e-79	0.485903	0.396933	3.01167e-11	1	1	1.71383e-21	5.87255e-79
2020157			2019974	-	-	predicted RNA	antisense: fliL fliM	249	611	72	142	66	1.09091	1	0.349178	3.67382e-23	0.480829	0.0457779	1.05332e-77	0.0951851	1	1	4.41851e-15	1.05332e-77
2818135			2818059	-	argZ	b2692	Arg tRNA	229	852	82	202	86	0.953488	1	0.732379	1.59391e-37	0.224657	0.385894	1.09194e-77	0.0951527	1	1	1.17816e-17	1.09194e-77
2015181			2015023	-	-	predicted RNA	antisense: fliG	197	586	66	98	60	1.1	1	0.383573	6.26018e-25	0.955048	0.218999	1.52456e-77	0.60543	0.294898	1	4.77724e-40	1.52456e-77
2015675			2015605	-	-	predicted RNA	antisense: fliG	195	524	63	113	54	1.16667	1	0.284001	1.4291e-34	0.45851	0.134488	3.20831e-76	0.26501	1	1	6.75617e-23	3.20831e-76
1157869	1157869	1159302	1159318	+	ptsG	b1101	fused glucose-specific PTS enzymes: IIB component/IIC component	819	1128	86	176	108	0.796296	1	3.31448e-08	1.09865e-75	0.138886	0.00568567	6.57471e-28	0.618603	1	1	1.99652e-07	1.09865e-75
2818549			2818473	-	argV	b2694	Arg tRNA	460	1278	137	274	135	1.01481	1	0.335601	8.49461e-28	0.497764	0.172968	4.92993e-75	0.2344	1	1	3.71366e-19	4.92993e-75
3656751	3656740	3656408	3656408	-	hdeA	b3510	stress response protein acid-resistance protein	43	40	335	546	767	0.436767	0.389877	0.233626	3.95547e-11	0.207613	0.000513092	1.07536e-74	0.655768	1	1	4.14357e-33	1.07536e-74
696830			696756	-	glnW	b0668	Gln tRNA	493	1550	141	297	172	0.819767	1	0.314253	9.69007e-41	0.411527	0.324297	3.08018e-74	0.435042	1	1	1.708e-24	3.08018e-74
4606401			4606315	-	leuQ	b4370	Leu tRNA	300	1357	142	315	152	0.934211	1	0.714423	7.05378e-30	0.322527	0.41711	1.24401e-72	0.135127	8.97833e-06	1	4.51358e-15	1.24401e-72
3453371	3453270	3452959	3452927	-	rpsJ	b3321	30S ribosomal subunit protein S10	2040	3155	276	1024	459	0.601307	0.752217	5.87574e-06	1.30604e-72	7.2796e-05	0.332923	8.28941e-13	0.413871	1	1	0.225863	1.30604e-72
1139763			1139508	-	-	predicted RNA	antisense: flgK	404	673	63	162	71	0.887324	1	0.0118451	1.61963e-40	0.135872	6.73815e-05	1.43557e-71	0.0770507	1	1	7.79885e-13	1.43557e-71
1735930			1735725	-	-	predicted RNA	antisense: sodB	496	643	79	136	71	1.11268	1	0.0165112	1.60202e-21	0.690514	4.93764e-09	4.06185e-70	0.292813	1	0.097075	1.2453e-18	4.06185e-70
	3451684	3451382	3451375	-	rplW	b3318	50S ribosomal subunit protein L23	2926	3995	343	1320	620	0.553226	0.740117	1.14149e-07	7.8725e-70	6.91566e-05	0.403747	1.36553e-05	0.644744	1	1	0.306623	7.8725e-70
1646403	1646405	1646737	1647454	+	flxA	b1566	Qin prophage; uncharacterized protein	202	364	75	87	41	1.82927	0.257245	0.672943	1.81112e-07	0.758016	0.00100357	5.41951e-69	0.11746	1	1	8.35082e-14	5.41951e-69
1159319			1157886	-	-	predicted RNA	antisense: ptsG	807	1099	87	168	106	0.820755	1	1.47604e-07	1.47628e-68	0.166633	0.00481327	4.08311e-28	0.620514	1	1	3.53956e-08	1.47628e-68
3811755	3811674	3811438	3811427	-	rpmB	b3637	50S ribosomal subunit protein L28	2122	3499	318	1052	461	0.689805	1	8.87264e-05	2.39119e-68	0.000619649	0.109833	4.94276e-24	0.20045	1	1	0.0771037	2.39119e-68
1970065			1970288	+	-	predicted RNA	antisense: tap	374	644	78	188	71	1.09859	1	0.175679	1.52269e-22	0.187943	0.000224749	3.80924e-68	0.00586053	1	1	3.44275e-08	3.80924e-68
4175472			4175556	+	tyrU	b3977	Tyr tRNA	1225	1518	129	388	172	0.75	1	1.5455e-06	2.61705e-48	0.054084	9.61759e-10	3.93524e-68	0.0563687	1	0.396242	9.58039e-12	3.93524e-68
4178445	4178447	4178875	4178875	+	rplK	b3983	50S ribosomal subunit protein L11	1841	3042	261	847	407	0.641278	0.938112	0.000101158	5.78246e-68	0.00247636	0.394993	3.0028e-09	0.586941	1	1	0.146961	5.78246e-68
4012906			4013004	+	-	predicted RNA	-	863	882	74	234	96	0.770833	1	1.37296e-10	9.05691e-48	0.0440249	1.02916e-15	1.34643e-67	0.0373817	1	0.0778802	2.69061e-11	1.34643e-67
1969910			1969933	+	-	predicted RNA	antisense: tap	292	537	67	160	55	1.21818	1	0.00289888	1.80358e-62	0.00697237	0.00172837	3.97676e-66	0.0100348	1	1	2.91336e-12	3.97676e-66
2520931			2521006	+	valU	b2401	Val tRNA	685	1837	156	410	208	0.75	1	0.228116	1.23576e-48	0.139765	0.227296	8.39906e-66	0.240166	1	1	3.25709e-16	8.39906e-66
3450526	3450526	3450248	3450234	-	rpsS	b3316	30S ribosomal subunit protein S19	2307	3071	282	1063	498	0.566265	0.647764	1.19304e-07	1.3197e-65	4.27517e-05	0.264814	8.83414e-11	0.417063	1	1	0.242544	1.3197e-65
3943435			3943510	+	gltU	b3757	Glu tRNA	146	517	75	109	56	1.33929	1	0.747258	3.44802e-18	0.942709	0.390522	1.40959e-63	0.428535	1	1	4.67564e-24	1.40959e-63
21145	21078	20815	20815	-	rpsT	b0023	30S ribosomal subunit protein S20	915	2361	220	698	275	0.8	1	0.0990835	2.37562e-63	0.00123761	0.264814	1.79691e-48	0.0156205	0.191019	1	0.012587	2.37562e-63
3322519	3322505	3322173	3322159	-	secG	b3175	preprotein translocase membrane subunit	324	1210	105	220	145	0.724138	1	0.441349	2.92834e-63	0.178545	0.500433	5.01507e-49	0.586941	1	1	8.88056e-19	2.92834e-63
1139404			1139151	-	-	predicted RNA	antisense: flgK	366	622	66	133	70	0.942857	1	0.064735	7.79287e-31	0.416785	0.000432702	1.63609e-62	0.345979	1	0.997288	9.34119e-18	1.63609e-62
3322569			3322520	-	-	predicted RNA	-	217	752	70	183	101	0.693069	1	0.284892	1.85191e-62	0.0511727	0.464707	9.24838e-37	0.527532	1	1	5.50381e-17	1.85191e-62
4037141			4037217	+	ileT	b3852	Ile tRNA	239	948	98	168	106	0.924528	1	0.828767	1.36607e-29	0.82591	0.412186	1.39436e-60	0.661265	0.519797	1	6.9725e-35	1.39436e-60
595804			595682	-	-	predicted RNA	antisense: cusC	330	622	50	211	108	0.462963	1	0.00475486	6.39442e-59	0.000363101	0.257002	1.26634e-25	0.220945	1	1	3.17222e-06	6.39442e-59
781558			780520	-	-	predicted RNA	antisense: valZ lysT lysW lysY lysZ valT	600	1688	131	360	177	0.740113	1	0.195999	1.4967e-58	0.0591429	0.790772	2.00225e-14	0.649326	0.199137	1	0.0202271	1.4967e-58
597699			597001	-	-	predicted RNA	antisense: cusB cusF	517	787	75	176	109	0.688073	1	5.9797e-05	5.34953e-58	0.0444971	0.0125494	1.2745e-30	0.491016	1	1	4.6394e-08	5.34953e-58
3811790			3811756	-	-	predicted RNA	-	1086	2156	191	602	246	0.776423	1	0.0423499	4.48989e-44	0.0399369	0.0123354	5.45265e-58	0.0456165	1	1	2.39156e-10	5.45265e-58
781147			781222	+	lysY	b0747	Lys tRNA	363	744	75	167	86	0.872093	1	0.0884683	2.17447e-40	0.261942	0.0215025	3.75687e-57	0.388931	1	1	1.04167e-19	3.75687e-57
3446554	3446545	3446153	3446153	-	rpsH	b3306	30S ribosomal subunit protein S8	1738	2743	259	1007	482	0.537344	0.662846	0.000195936	6.69114e-57	4.56074e-05	0.794683	0.00033758	0.709098	1	1	0.373113	6.69114e-57
1973004			1973175	+	-	predicted RNA	antisense: cheW	520	644	78	170	80	0.975	1	0.00753207	9.27487e-22	0.331476	3.73622e-08	7.00995e-57	0.0966137	1	0.500957	5.09385e-11	7.00995e-57
4425048			4425063	+	-	predicted RNA	-	1208	2242	226	663	260	0.869231	1	0.00982821	4.46657e-53	0.0123146	0.00634493	8.93716e-57	0.0304688	1	1	1.55295e-10	8.93716e-57
1966564			1966703	+	-	predicted RNA	antisense: cheZ	422	634	72	142	76	0.947368	1	0.0447318	1.89537e-24	0.519772	7.46986e-05	1.51098e-56	0.371938	1	0.462966	1.5254e-17	1.51098e-56
4209875			4209788	-	-	predicted RNA	antisense: gltV	159	500	73	104	56	1.30357	1	0.709102	3.0448e-14	0.903932	0.380234	3.55254e-56	0.515098	1	1	1.4546e-24	3.55254e-56
3311765			3311737	-	-	predicted RNA	-	595	1410	141	517	211	0.668246	1	0.113043	1.75593e-55	0.000162955	0.371141	7.36988e-30	0.0673439	1	1	1.84805e-06	1.75593e-55
780765			780840	+	valT	b0744	Val tRNA	640	1728	139	384	210	0.661905	1	0.191202	3.4574e-55	0.104954	0.320691	1.41388e-54	0.392793	1	1	1.72435e-16	3.4574e-55
3322153			3322570	+	-	predicted RNA	antisense: secG leuU	309	1059	101	197	130	0.776923	1	0.400002	9.68379e-55	0.207774	0.475907	3.32588e-46	0.577743	1	1	9.45219e-17	9.68379e-55
3453399			3453372	-	-	predicted RNA	-	1193	1934	183	594	279	0.655914	1	0.000398105	1.86308e-54	0.00549012	0.0212496	2.28969e-33	0.232959	1	1	2.42486e-09	1.86308e-54
2521193			2520936	-	-	predicted RNA	antisense: valY valU valX	718	1790	173	400	214	0.808411	1	0.138	4.00018e-54	0.0632366	0.259836	4.34947e-49	0.273307	1	1	2.54204e-09	4.00018e-54
3449899			3449886	-	-	predicted RNA	-	2789	3537	345	1309	618	0.558252	1	3.37773e-07	2.20789e-53	0.000158053	0.00836135	1.72227e-21	0.220297	1	1	9.69595e-06	2.20789e-53
2019602	2019618	2020082	2020086	+	fliL	b1944	flagellar biosynthesis protein	280	552	73	134	64	1.14062	1	0.258349	7.19093e-23	0.365669	0.0237729	4.53363e-53	0.185114	1	1	1.87732e-10	4.53363e-53
2518231			2518156	-	alaW	b2397	Ala tRNA	437	1210	127	299	156	0.814103	1	0.31139	2.35701e-29	0.258558	0.362462	1.20299e-50	0.273882	1	1	1.91717e-13	1.20299e-50
2021143			2021066	-	-	predicted RNA	antisense: fliN fliM	259	552	69	115	64	1.07812	1	0.229286	7.60116e-27	0.680452	0.0787438	1.45324e-50	0.547933	1	1	1.44015e-24	1.45324e-50
1147316	1147367	1147540	1147612	+	rpmF	b1089	50S ribosomal subunit protein L32	1252	2417	241	797	366	0.65847	1	0.0162144	5.55034e-50	0.00100062	0.205807	4.57169e-28	0.0710296	1	1	0.00582995	5.55034e-50
3210744			3210754	+	-	predicted RNA	-	744	1395	173	535	243	0.711934	1	0.0165112	5.79973e-50	0.000212224	0.32804	8.81678e-22	0.184328	1	1	4.95843e-06	5.79973e-50
1991987			1991914	-	cysT	b1910	Cys tRNA	286	954	121	157	116	1.0431	1	0.791274	2.38597e-18	0.731903	0.390522	7.40464e-50	0.828895	0.54039	1	9.11423e-41	7.40464e-50
4037260			4037335	+	alaT	b3853	Ala tRNA	85	333	65	70	43	1.51163	0.708628	0.580318	5.30923e-10	0.56695	0.437158	6.45911e-49	0.586941	1	1	7.12855e-25	6.45911e-49
225519			225370	-	-	predicted RNA	antisense: ileV alaV	203	821	106	164	105	1.00952	1	0.689811	2.2492e-19	0.852156	0.493604	3.04441e-48	0.586941	3.77309e-05	1	2.82174e-21	3.04441e-48
3427014			3427163	+	-	predicted RNA	antisense: ileU alaU	209	839	109	168	107	1.01869	1	0.675233	3.1494e-19	0.856696	0.505039	4.99511e-48	0.586941	0.0014789	1	2.37623e-21	4.99511e-48
4180532			4180559	+	-	predicted RNA	-	3606	4569	390	1523	651	0.599078	1	3.24759e-06	7.13153e-48	0.00229178	0.000112684	7.33981e-36	0.0540728	1	1	4.86905e-06	7.13153e-48
3719905			3719946	+	-	predicted RNA	-	243	8977	909	4171	1526	0.595675	1	0.401108	2.59233e-46	3.44772e-07	0.410692	2.38866e-21	0.0034431	1.75258e-47	1	0.237872	1.75258e-47
4425514	4425520	4425834	4425834	+	priB	b4201	primosomal protein N	1847	2684	280	846	371	0.754717	1	0.000180085	2.55964e-47	0.003352	0.0720423	3.279e-20	0.233385	1	1	0.129328	2.55964e-47
	2014880	2015875		+	fliG	b1939	flagellar motor switching and energizing component	180	473	59	102	57	1.03509	1	0.29861	8.10383e-32	0.261395	0.332923	2.92005e-47	0.350937	1	1	3.85401e-10	2.92005e-47
4126983	4127013	4127225	4127230	+	rpmE	b3936	50S ribosomal subunit protein L31	1054	2034	209	599	258	0.810078	1	0.0216229	4.95142e-47	0.00760429	0.00521409	6.14237e-43	0.0406069	1	1	0.000349453	4.95142e-47
33206			33191	-	-	predicted RNA	antisense: carB	392	558	94	140	106	0.886792	1	0.00425126	1.47158e-32	0.872583	0.118149	7.0101e-18	0.787053	1	0.00040572	1.89693e-46	1.89693e-46
3445606	3445597	3445244	3445234	-	rplR	b3304	50S ribosomal subunit protein L18	1712	2418	255	931	486	0.524691	0.580477	0.000107879	1.9555e-46	0.000116525	0.763078	0.000708319	0.618603	1	1	0.358143	1.9555e-46
1138378	1138378	1140021	1140021	+	flgK	b1082	flagellar hook-filament junction protein 1	332	582	62	127	61	1.01639	1	0.0165112	1.47094e-41	0.0965691	0.00855643	3.64917e-46	0.233385	1	1	0.000261218	3.64917e-46
3943536			3943435	-	-	predicted RNA	antisense: gltU	157	506	73	107	64	1.14062	1	0.667172	3.23863e-13	0.917314	0.390522	1.61726e-45	0.581833	1	1	1.64532e-22	1.61726e-45
4426071			4426107	+	-	predicted RNA	-	1677	2442	240	762	333	0.720721	1	0.00520575	1.09878e-33	0.037618	0.000433596	3.10293e-45	0.0419843	1	1	1.65647e-07	3.10293e-45
1146758	1146794	1147315	1147315	+	yceD	b1088	DUF177 family protein	976	1975	205	660	278	0.73741	1	0.0596737	1.86534e-44	0.00239952	0.394136	1.38576e-13	0.36501	1	1	0.264381	1.86534e-44
2282456			2282494	+	-	predicted RNA	-	366	829	89	250	130	0.684615	1	0.149682	1.88735e-44	0.0249001	0.384399	2.26346e-25	0.466966	1	1	3.01214e-10	1.88735e-44
3474590			3474573	-	-	predicted RNA	-	1039	1862	204	761	335	0.608955	1	0.0178664	3.82374e-44	0.000126602	0.329822	2.14767e-19	0.158673	1	1	4.79881e-05	3.82374e-44
696740			696664	-	metU	b0666	Met tRNA	316	880	94	173	114	0.824561	1	0.333676	3.38259e-27	0.717822	0.369245	1.43464e-43	0.716251	0.592324	1	1.85113e-27	1.43464e-43
2521051			2521126	+	valX	b2402	Val tRNA	804	2035	213	462	266	0.800752	1	0.328744	1.5741e-31	0.315564	0.371141	3.12993e-43	0.484572	1	1	1.96962e-15	3.12993e-43
3921235	3921189	3920950	3920950	-	atpE	b3737	F0 sector of membrane-bound ATP synthase, subunit c	1358	1643	174	755	268	0.649254	1	2.61268e-06	5.15336e-43	1.51576e-06	0.00177469	1.62966e-23	0.00243329	1	1	0.242273	5.15336e-43
1991789			1992116	+	-	predicted RNA	antisense: glyW cysT leuZ	252	767	105	142	99	1.06061	1	0.745038	1.25793e-21	0.884522	0.409059	1.3327e-42	0.704478	1	1	2.59621e-22	1.3327e-42
4425835	4425839	4426066	4426070	+	rpsR	b4202	30S ribosomal subunit protein S18	1637	2292	254	751	354	0.717514	1	0.000227029	5.7922e-42	0.003352	0.0174863	1.09322e-23	0.10717	1	1	0.0259409	5.7922e-42
3332861			3332846	-	-	predicted RNA	-	545	783	110	289	136	0.808824	1	0.00056956	7.48422e-42	0.00320746	0.133114	1.05455e-17	0.419391	1	1	2.74603e-07	7.48422e-42
3311736	3311684	3311415	3311415	-	rpsO	b3165	30S ribosomal subunit protein S15	1025	2370	265	868	369	0.718157	1	0.152723	1.10854e-41	0.000734666	0.390522	1.3086e-18	0.11746	0.268928	1	0.190771	1.10854e-41
1971611			1972047	+	-	predicted RNA	antisense: tar	502	604	76	201	78	0.974359	1	0.000685802	9.43624e-26	0.0380368	1.88025e-06	1.15895e-41	0.0124918	1	1	0.000306295	1.15895e-41
	2005713	2006078	2006078	+	fliT	b1926	putative flagellar synthesis and assembly chaperone	228	403	60	103	54	1.11111	1	0.301945	4.33618e-15	0.619955	0.0205701	6.6477e-41	0.341544	1	1	1.70735e-11	6.6477e-41
3599125			3599137	+	-	predicted RNA	antisense: livJ	410	570	96	237	159	0.603774	0.241686	0.000344502	7.5035e-41	0.00162758	0.409059	6.53925e-06	0.999393	1	1	1.6701e-09	7.5035e-41
3378794			3378712	-	-	predicted RNA	-	1119	1620	149	559	219	0.680365	1	0.000965258	1.53498e-40	0.00367153	0.00066923	9.40707e-41	0.0129453	1	1	2.5245e-05	9.40707e-41
4425064	4425118	4425513	4425513	+	rpsF	b4200	30S ribosomal subunit protein S6	1932	3091	310	971	403	0.769231	1	0.00570668	1.13505e-40	0.00855938	0.363762	1.08797e-12	0.445552	1	1	0.254561	1.13505e-40
781369			781444	+	lysZ	b0748	Lys tRNA	282	650	80	169	87	0.91954	1	0.288845	4.7442e-23	0.385233	0.264814	1.14433e-40	0.39215	1	1	4.41872e-14	1.14433e-40
3210755	3210781	3210996	3211001	+	rpsU	b3065	30S ribosomal subunit protein S21	1291	2393	270	955	405	0.666667	1	0.0319485	1.47936e-40	0.000159924	0.332923	5.52375e-18	0.0639597	1	1	0.194448	1.47936e-40
3450233	3450233	3449901	3449900	-	rplV	b3315	50S ribosomal subunit protein L22	2797	3893	380	1319	633	0.600316	1	0.000315198	1.58903e-40	0.00338805	0.953569	0.000531472	0.918417	1	1	0.35287	1.58903e-40
586057			586101	+	pauD	b4635	Xaa tRNA	17	28	65	25	48	1.35417	1	0.812862	0.157079	5.2528e-40	0.789295	0.568818	5.82337e-19	1	1	7.01648e-06	5.2528e-40
1992117			1992042	-	glyW	b1911	Gly tRNA	254	698	102	141	94	1.08511	1	0.869313	3.9107e-13	0.821334	0.381625	7.35972e-40	0.722319	1	1	1.52997e-25	7.35972e-40
4175388			4175463	+	thrU	b3976	Thr tRNA	642	873	88	250	118	0.745763	1	0.00166006	7.11275e-32	0.102533	0.000219148	9.95823e-40	0.203897	1	1	4.37091e-10	9.95823e-40
4126927			4126982	+	-	predicted RNA	-	480	1006	124	270	135	0.918519	1	0.268683	1.23664e-19	0.431717	0.149771	1.1399e-39	0.354593	1	1	2.67293e-13	1.1399e-39
1020173			1020125	-	-	predicted RNA	-	3056	3933	380	2540	841	0.451843	0.829879	6.05868e-05	2.75829e-39	2.42557e-13	0.180237	8.48969e-13	0.00059747	1	1	0.30101	2.75829e-39
696616			696542	-	glnV	b0665	Gln tRNA	227	645	83	111	90	0.922222	1	0.757112	2.29399e-19	0.804836	0.390522	1.63798e-36	0.938186	1	1	6.89832e-39	6.89832e-39
1991901			1991815	-	leuZ	b1909	Leu tRNA	168	667	97	122	90	1.07778	1	0.648566	2.0346e-13	0.681922	0.588348	8.04324e-39	0.828895	1	1	6.10177e-32	8.04324e-39
3446884	3446884	3446579	3446558	-	rpsN	b3307	30S ribosomal subunit protein S14	3010	4816	447	1911	839	0.532777	0.947984	0.00753207	9.98186e-39	0.00034857	0.818687	0.0119916	0.918156	1	1	0.888796	9.98186e-39
225381			225457	+	ileV	b0202	Ile tRNA	245	951	121	178	134	0.902985	1	0.667212	1.63407e-18	0.935866	0.508968	3.95685e-38	0.828895	0.489789	1	1.08517e-30	3.95685e-38
225500			225575	+	alaV	b0203	Ala tRNA	86	301	55	59	43	1.27907	1	0.663866	1.91292e-13	0.588632	0.435127	6.82243e-38	0.826824	1	1	7.49135e-32	6.82243e-38
3427033			3426958	-	alaU	b3276	Ala tRNA	88	336	68	73	48	1.41667	0.905409	0.582624	3.50013e-09	0.581592	0.507593	9.07207e-38	0.677492	1	1	1.5548e-22	9.07207e-38
4471455	4471447	4470986	4470986	-	pyrI	b4244	aspartate carbamoyltransferase, regulatory subunit	1160	1005	115	213	209	0.550239	0.813738	1.95353e-12	9.87862e-38	0.214446	0.00399073	6.84217e-10	0.961632	1	0.00417817	4.83072e-11	9.87862e-38
190604			190755	+	-	predicted RNA	-	1205	1906	200	775	361	0.554017	1	0.00574016	9.95986e-38	0.000179396	0.263641	9.35385e-17	0.0924997	1	1	0.0280506	9.95986e-38
3811264			3811802	+	-	predicted RNA	antisense: rpmB rpmG	1685	2732	255	827	349	0.730659	1	0.0106183	1.98586e-37	0.0182322	0.395905	1.06926e-08	0.56683	1	1	0.272788	1.98586e-37
3411492			3411131	-	-	predicted RNA	antisense: fis dusB	431	654	81	173	89	0.910112	1	0.0373218	1.71858e-25	0.199963	0.00431313	3.27969e-37	0.273882	1	1	1.91267e-08	3.27969e-37
3427152			3427076	-	ileU	b3277	Ile tRNA	247	955	126	182	137	0.919708	1	0.664844	2.87515e-17	0.910886	0.514078	7.27088e-37	0.826824	0.48049	1	1.43916e-29	7.27088e-37
3444725	3444722	3444543	3444540	-	rpmD	b3302	50S ribosomal subunit protein L30	1762	2550	296	895	483	0.612836	1	0.00162161	7.81751e-37	0.00288021	0.205807	6.96205e-14	0.273882	1	1	0.0353447	7.81751e-37
1967451	1967437	1967048	1967048	-	cheY	b1882	chemotaxis regulator transmitting signal to flagellar motor component	306	496	88	118	68	1.29412	1	0.327588	7.16514e-12	0.902325	0.0135602	1.49903e-36	0.488563	1	1	1.64253e-12	1.49903e-36
2746212	2746185	2745937	2745919	-	rpsP	b2609	30S ribosomal subunit protein S16	1112	1860	218	696	309	0.705502	1	0.0162144	2.62406e-36	0.00128343	0.175552	3.20448e-20	0.0655364	1	1	0.0821632	2.62406e-36
1135501			1134791	-	-	predicted RNA	antisense: flgG	409	670	89	182	91	0.978022	1	0.0500275	2.90569e-27	0.0981968	0.0125659	7.00646e-36	0.161953	1	1	6.39589e-05	7.00646e-36
3811417	3811417	3811250	3811214	-	rpmG	b3636	50S ribosomal subunit protein L33	1003	1486	164	508	206	0.796117	1	0.00653023	1.71502e-32	0.0111247	0.00359135	7.27344e-36	0.0225328	1	1	0.00045901	7.27344e-36
1134565	1134729	1135511	1135512	+	flgG	b1078	flagellar component of cell-distal portion of basal-body rod	406	649	85	165	88	0.965909	1	0.0358528	2.80296e-28	0.124168	0.0103043	2.57404e-35	0.236063	1	1	1.10997e-05	2.57404e-35
3982739			3982374	-	-	predicted RNA	antisense: hisR argX proM leuT	731	1820	217	453	284	0.764085	1	0.225216	2.7216e-35	0.0678755	0.432899	2.2162e-17	0.500193	0.134283	1	0.000271616	2.7216e-35
4606155			4606422	+	-	predicted RNA	antisense: leuQ leuP leuV	348	1210	150	326	167	0.898204	1	0.76938	2.12502e-29	0.11556	0.51352	3.22971e-35	0.236749	1	1	7.65958e-07	3.22971e-35
220206			220913	+	-	predicted RNA	antisense: metQ	622	730	87	308	107	0.813084	1	1.61669e-05	4.38624e-35	0.000178916	0.000247202	1.64398e-27	0.00338781	1	1	0.260997	4.38624e-35
3333505	3333451	3333140	3333120	-	rplU	b3186	50S ribosomal subunit protein L21	1623	2689	316	936	384	0.822917	1	0.0201672	6.18291e-35	0.00507577	0.251788	3.37436e-18	0.180355	1	1	0.241605	6.18291e-35
3920949	3920888	3920418	3920413	-	atpF	b3736	F0 sector of membrane-bound ATP synthase, subunit b	1205	1561	186	703	259	0.718147	1	0.000277004	7.40789e-35	5.33603e-05	0.151099	1.2797e-12	0.0950435	1	1	0.461745	7.40789e-35
3378711	3378651	3378223	3378223	-	rplM	b3231	50S ribosomal subunit protein L13	2288	3452	327	1058	498	0.656627	1	0.00690758	2.72003e-34	0.0230519	0.950209	4.38352e-05	0.918417	1	1	0.28863	2.72003e-34
189712			189847	+	tff	b4414	-	1078	1899	205	707	320	0.640625	1	0.050529	3.62512e-34	0.00260755	0.291582	5.67575e-22	0.0847382	1	1	0.00388826	3.62512e-34
	3448568	3448314	3448152	-	rpsQ	b3311	30S ribosomal subunit protein S17	1927	2915	352	1091	520	0.676923	1	0.00753207	1.24622e-33	0.00241049	0.371141	1.44744e-09	0.389986	1	1	0.271539	1.24622e-33
3211043			3210685	-	-	predicted RNA	antisense: rpsU	968	1858	226	708	311	0.726688	1	0.0939261	1.98869e-33	0.00184452	0.390522	1.82582e-13	0.21122	1	1	0.247274	1.98869e-33
3920409	3920403	3919870	3919870	-	atpH	b3735	F1 sector of membrane-bound ATP synthase, delta subunit	995	1093	134	551	207	0.647343	1	4.07912e-06	2.03388e-33	2.94661e-06	0.0787438	3.62412e-10	0.0770507	1	1	0.510516	2.03388e-33
1973339	1973339	1972836	1972692	-	cheW	b1887	purine-binding chemotaxis protein	436	530	82	145	75	1.09333	1	0.0124991	1.11012e-17	0.335669	5.9834e-05	2.53752e-33	0.277011	1	1	3.038e-07	2.53752e-33
2282495	2282517	2282801	2282813	+	rplY	b2185	50S ribosomal subunit protein L25	768	1422	170	471	252	0.674603	1	0.0636895	2.70446e-33	0.0105421	0.345132	2.75874e-18	0.253291	1	1	0.0047586	2.70446e-33
1316081	1316035	1315856	1315856	-	yciG	b1259	KGG family protein	21	20	116	188	218	0.53211	1	0.274205	7.65422e-08	0.730144	0.000321197	3.07042e-33	0.755359	1	1	1.15893e-22	3.07042e-33
850432			850446	+	-	predicted RNA	-	544	759	118	503	182	0.648352	0.938611	0.00317369	1.79051e-32	6.9122e-11	0.332923	1.02709e-10	0.00586053	1	1	0.0569669	1.79051e-32
	3448759	3448568		-	rpmC	b3312	50S ribosomal subunit protein L29	2310	3336	414	1250	624	0.663462	1	0.00485677	2.6161e-32	0.00294542	0.348068	8.49402e-10	0.36673	1	1	0.218573	2.6161e-32
3333119	3333119	3332862	3332862	-	rpmA	b3185	50S ribosomal subunit protein L27	1206	1861	231	632	288	0.802083	1	0.0109389	2.72139e-32	0.00807754	0.0485024	2.26087e-24	0.0770507	1	1	0.027902	2.72139e-32
	1583959	1583762		-	safA	b1500	two-component system connector membrane protein, EvgSA to PhoQP	7	14	28	8	11	2.54545	0.0588006	0.804152	0.309448	3.53207e-32	0.499604	0.326286	0.00425216	1	1	5.10832e-07	3.53207e-32
1641331			1641697	+	-	predicted RNA	antisense: cspB	18	938	276	841	346	0.797688	1	0.659674	0.000316705	0.00394456	0.907263	0.0345383	0.204845	5.30546e-32	1	0.676076	5.30546e-32
4426108	4426108	4426557	4426586	+	rplI	b4203	50S ribosomal subunit protein L9	1573	1782	218	684	304	0.717105	1	2.07481e-05	7.74761e-32	0.00244031	0.125931	5.73122e-10	0.350937	1	1	0.334795	7.74761e-32
585638	585633	584680	584654	-	ompT	b0565	DLP12 prophage; outer membrane protease VII (outer membrane protein 3b)	1457	1509	147	477	178	0.825843	1	1.43804e-06	1.71313e-31	0.023498	0.0103043	3.00402e-13	0.429979	1	1	0.311602	1.71313e-31
2518091			2518237	+	-	predicted RNA	antisense: alaX alaW	419	1118	134	281	164	0.817073	1	0.48869	3.95047e-24	0.327816	0.445445	2.14301e-31	0.516521	1	1	1.02967e-11	2.14301e-31
3678700			3678835	+	-	predicted RNA	antisense: yhjH	435	583	91	150	93	0.978495	1	0.187284	7.21645e-12	0.810851	0.00189083	2.18142e-31	0.527532	1	0.520844	1.14067e-12	2.18142e-31
2744530	2744530	2744183	2743619	-	rplS	b2606	50S ribosomal subunit protein L19	1100	1587	200	680	301	0.664452	1	0.00560641	2.66167e-31	0.000374639	0.311568	6.77878e-11	0.18301	1	1	0.30722	2.66167e-31
4543003			4543020	+	-	predicted RNA	-	672	451	79	473	123	0.642276	0.609681	5.35966e-18	1.51914e-29	3.56793e-31	0.00159825	1.98701e-06	1.15433e-05	1	1	0.345115	3.56793e-31
4392360			4392435	+	glyV	b4163	Gly tRNA	522	1208	148	380	192	0.770833	1	0.314959	2.13234e-20	0.164941	0.365682	5.06334e-31	0.208205	1	1	2.24112e-07	5.06334e-31
4606286			4606200	-	leuP	b4369	Leu tRNA	396	1289	183	382	198	0.924242	1	0.972311	1.3947e-15	0.36846	0.519343	2.26136e-30	0.305921	1	1	2.49022e-08	2.26136e-30
1151582	1151615	1151851	1151851	+	acpP	b1094	acyl carrier protein (ACP)	1839	3501	433	1773	760	0.569737	0.773378	0.126131	3.44162e-30	1.0957e-05	0.476501	0.00573514	0.548197	1	1	1	3.44162e-30
32828			32800	-	-	predicted RNA	antisense: carB	428	589	90	124	105	0.857143	1	0.0356741	3.01157e-21	0.994732	0.022615	3.31827e-23	0.971154	1	0.0125769	5.98538e-30	5.98538e-30
1135544	1135564	1136262	1136267	+	flgH	b1079	flagellar protein of basal-body outer-membrane L ring	184	368	62	107	55	1.12727	1	0.425701	1.41859e-14	0.353208	0.279745	8.94245e-30	0.241625	1	1	4.05434e-06	8.94245e-30
781068			781143	+	valZ	b0746	Val tRNA	377	916	111	215	146	0.760274	1	0.308902	1.41614e-20	0.610159	0.365682	2.06094e-29	0.709098	0.541936	1	8.10417e-18	2.06094e-29
2282777			2282457	-	-	predicted RNA	antisense: rplY	693	1374	177	459	236	0.75	1	0.144769	2.63718e-29	0.0148806	0.369245	9.63155e-19	0.204845	1	1	0.0112288	2.63718e-29
595586	595600	596973	597038	+	cusC	b0572	copper/silver efflux system, outer membrane component	246	445	57	170	96	0.59375	0.783692	0.0922013	3.85558e-29	0.00378378	0.443227	4.53792e-06	0.500193	1	1	0.226574	3.85558e-29
3884486	3884493	3884852		+	rnpA	b3704	protein C5 component of RNase P	351	805	116	213	120	0.966667	1	0.415205	9.32339e-21	0.277692	0.390522	4.15532e-29	0.415196	1	1	1.42516e-07	4.15532e-29
1388344			1388815	+	-	predicted RNA	antisense: tpx	908	914	118	460	170	0.694118	1	1.56095e-06	5.08401e-29	1.85036e-05	0.00190382	3.0336e-15	0.0100348	1	1	0.374812	5.08401e-29
3411072			3410828	-	-	predicted RNA	antisense: dusB	331	591	84	179	91	0.923077	1	0.284001	1.59648e-16	0.291741	0.12488	5.20937e-29	0.283736	1	1	2.19223e-07	5.20937e-29
2016041			2015910	-	-	predicted RNA	antisense: fliH	205	605	88	127	100	0.88	1	0.949348	8.29175e-14	0.931209	0.409059	5.35121e-29	0.828895	0.134283	1	1.5548e-22	5.35121e-29
1388820	1388811	1388305	1388305	-	tpx	b1324	lipid hydroperoxide peroxidase	839	873	113	426	154	0.733766	1	5.08139e-06	7.52883e-29	4.62642e-05	0.00114988	1.61147e-17	0.00651987	1	1	0.357186	7.52883e-29
3656401	3656292	3655966	3655964	-	hdeB	b3509	acid-resistance protein	32	33	211	321	400	0.5275	0.547219	0.879676	1.36875e-06	0.413363	0.921029	5.99711e-28	0.660056	1	1	1.5355e-16	5.99711e-28
220942	220928	220113	220113	-	metQ	b0197	DL-methionine transporter subunit	590	680	91	300	102	0.892157	1	0.000174435	1.96832e-27	0.000647504	0.000432702	1.15334e-24	0.00340986	1	1	0.339474	1.96832e-27
926210			926463	+	-	predicted RNA	antisense: infA	446	1184	149	377	191	0.780105	1	0.459089	2.70737e-27	0.0429361	0.483394	2.76073e-24	0.211631	1	1	0.000196348	2.70737e-27
3440035			3440009	-	-	predicted RNA	-	2056	2984	322	1102	555	0.58018	1	0.0165112	3.41406e-27	0.0163576	0.0822416	9.15925e-21	0.220297	1	1	4.2451e-05	3.41406e-27
3865			3855	-	-	predicted RNA	antisense: thrC	499	556	102	200	175	0.582857	0.404654	0.000102612	3.63949e-27	0.21765	0.371141	2.22073e-05	0.556837	1	0.00632663	1.03057e-19	3.63949e-27
3442765	3442734	3442618	3442560	-	rpmJ	b3299	50S ribosomal subunit protein L36	2164	3176	416	1417	701	0.593438	1	0.014397	3.88137e-27	0.000505782	0.345132	3.21524e-10	0.161953	1	1	0.183222	3.88137e-27
607734			607792	+	sokE	b4700	-	22	28	55	23	36	1.52778	1	0.460389	0.213773	5.0054e-27	0.499604	0.854225	4.69368e-09	1	1	1.07748e-05	5.0054e-27
1016035			1016464	+	-	predicted RNA	antisense: fabA	323	835	141	262	129	1.09302	1	0.680722	7.29479e-16	0.172689	0.448902	7.24732e-27	0.157723	1	1	0.000504125	7.24732e-27
3471399			3471349	-	-	predicted RNA	-	3380	5262	656	2108	1046	0.627151	1	0.0371593	1.28145e-26	0.00388038	0.311433	5.25548e-15	0.16783	1	1	0.0174918	1.28145e-26
2020087	2020087	2021091		+	fliM	b1945	flagellar motor switching and energizing component	178	421	64	109	65	0.984615	1	0.364192	7.76942e-20	0.268106	0.390522	1.68837e-26	0.425857	1	1	2.69272e-06	1.68837e-26
3452296	3452286	3451681		-	rplD	b3319	50S ribosomal subunit protein L4	2069	2669	256	985	469	0.545842	1	0.00322247	2.0749e-26	0.0115379	0.838109	0.0277825	0.831908	1	1	0.745098	2.0749e-26
3982375			3982451	+	argX	b3796	Arg tRNA	569	1450	207	387	235	0.880851	1	0.55918	1.96224e-15	0.538466	0.417355	2.08955e-26	0.538759	1	1	9.54531e-11	2.08955e-26
21189			21146	-	-	predicted RNA	antisense: yaaY	364	998	138	352	160	0.8625	1	0.770837	1.34447e-17	0.160937	0.410649	2.25592e-26	0.180355	1	1	5.10832e-07	2.25592e-26
926455	926443	926225	925972	-	infA	b0884	translation initiation factor IF-1	473	1277	165	399	199	0.829146	1	0.506071	2.69634e-25	0.0648984	0.470448	2.46644e-26	0.201147	1	1	7.11345e-05	2.46644e-26
3982509			3982585	+	hisR	b3797	His tRNA	976	2398	295	597	379	0.778364	1	0.425019	4.93519e-24	0.332145	0.432899	3.70559e-26	0.593025	1	1	2.71334e-11	3.70559e-26
1746435			1746511	+	valV	b1665	Val tRNA	57	104	46	32	38	1.21053	1	0.579466	0.0481085	0.0010823	0.865749	0.000235734	0.125016	1	0.540852	3.98744e-26	3.98744e-26
3378217	3378207	3377815	3377772	-	rpsI	b3230	30S ribosomal subunit protein S9	1962	2677	319	907	469	0.680171	1	0.00857449	5.1797e-26	0.025201	0.640824	0.000186809	0.739129	1	1	0.287554	5.1797e-26
3918265	3918265	3917402	3917376	-	atpG	b3733	F1 sector of membrane-bound ATP synthase, gamma subunit	632	888	117	416	179	0.653631	0.916613	0.0124991	7.41776e-26	0.000349757	0.410692	4.85473e-05	0.441025	1	1	0.683208	7.41776e-26
4472395	4472395	4471460	4471456	-	pyrB	b4245	aspartate carbamoyltransferase, catalytic subunit	1103	998	126	229	231	0.545455	0.800457	2.14919e-07	1.41676e-25	0.166761	0.852017	0.0670511	0.961166	1	1	0.00100036	1.41676e-25
3599691			3599673	-	-	predicted RNA	-	405	607	100	250	168	0.595238	0.904911	0.040025	5.46107e-25	0.0161453	0.390522	2.08817e-08	0.719711	1	1	1.20589e-05	5.46107e-25
2817860			2817784	-	argQ	b2691	Arg tRNA	76	354	70	99	57	1.22807	1	0.565473	2.83037e-09	0.969173	0.731215	5.50683e-25	0.565665	1	1	2.54221e-12	5.50683e-25
3982606			3982692	+	leuT	b3798	Leu tRNA	691	1655	222	416	270	0.822222	1	0.490745	1.57454e-18	0.503747	0.443227	1.39796e-24	0.638748	1	1	3.90042e-12	1.39796e-24
3447767	3447767	3447453	3447453	-	rplX	b3309	50S ribosomal subunit protein L24	2560	3323	402	1479	723	0.556017	0.928249	0.00592448	1.42291e-24	0.00147448	0.808029	0.0541685	0.928422	1	1	0.870216	1.42291e-24
3440008	3439999	3439616	3439591	-	rplQ	b3294	50S ribosomal subunit protein L17	1305	1740	240	686	356	0.674157	0.950016	0.00783419	1.43624e-24	0.00661508	0.384874	1.64338e-06	0.476217	1	1	0.289065	1.43624e-24
2663624			2663526	-	-	predicted RNA	antisense: suhB	230	587	101	182	99	1.0202	1	0.761802	2.79241e-09	0.699577	0.400679	2.33978e-24	0.434715	1	1	1.21385e-08	2.33978e-24
33094			33050	-	-	predicted RNA	antisense: carB	374	553	85	128	92	0.923913	1	0.0764233	1.52554e-20	0.742593	0.0457779	4.69268e-24	0.818711	1	0.33189	1.54834e-19	4.69268e-24
127805			127838	+	-	predicted RNA	-	369	635	89	243	122	0.729508	1	0.140688	4.71271e-24	0.034045	0.332923	1.91459e-17	0.355507	1	1	4.95843e-06	4.71271e-24
4470985	4470913	4470527	4470527	-	ridA	b4243	enamine/imine deaminase, reaction intermediate detoxification	832	787	107	209	169	0.633136	1	3.09458e-06	8.41529e-24	0.212073	0.00326436	3.06483e-12	0.807472	1	0.183595	2.10415e-07	8.41529e-24
2691200			2691329	+	-	predicted RNA	antisense: glmY	501	1535	826	4868	1365	0.605128	0.865686	0.162221	0.176814	5.4885e-13	0.000258311	0.738679	0.189338	1	2.31086e-23	0.116771	2.31086e-23
2947497			2947573	+	metW	b2815	Met tRNA	482	1640	237	363	279	0.849462	1	0.789741	2.45658e-15	0.855003	0.751192	2.81634e-23	0.818711	1	1	9.9718e-17	2.81634e-23
2741163	2741150	2740080	2740080	-	aroF	b2601	3-deoxy-D-arabino-heptulosonate-7-phosphate synthase, tyrosine-repressible	238	438	516	2545	787	0.655654	1	0.222656	0.613422	0.628243	0.00224957	0.757318	0.859131	1	4.56927e-23	0.0045599	4.56927e-23
2014937			2014872	-	-	predicted RNA	antisense: fliF fliG	173	544	84	117	102	0.823529	1	0.871066	3.90318e-16	0.996074	0.797321	2.90648e-18	0.969152	1	1	6.75617e-23	6.75617e-23
	1976255	1975329	1975328	-	motB	b1889	protein that enables flagellar motor rotation	236	544	85	148	85	1	1	0.312858	1.59994e-18	0.196105	0.390522	8.14263e-23	0.371938	0.808493	1	0.000154203	8.14263e-23
3678993			3679122	+	-	predicted RNA	antisense: yhjH	448	556	98	154	102	0.960784	1	0.222656	5.47508e-09	0.885875	0.00554461	8.22972e-23	0.604499	1	0.520844	1.1077e-10	8.22972e-23
3411271	3411271	3411567	3411567	+	fis	b3261	global DNA-binding transcriptional dual regulator	373	587	85	166	98	0.867347	1	0.219383	7.87536e-17	0.351256	0.115412	9.71284e-23	0.515098	1	1	5.4518e-08	9.71284e-23
3884257	3884336	3884476	3884484	+	rpmH	b3703	50S ribosomal subunit protein L34	860	1290	173	462	217	0.797235	1	0.115728	5.76114e-20	0.0591449	0.0761231	1.63786e-22	0.152034	1	1	0.000320598	1.63786e-22
4178876	4178879	4179583	4179803	+	rplA	b3984	50S ribosomal subunit protein L1	1995	3211	283	906	439	0.644647	1	0.104437	2.04358e-22	0.118744	0.842614	0.00197208	0.831908	1	1	0.306335	2.04358e-22
1970984	1970984	1969383	1969370	-	tap	b1885	methyl-accepting protein IV	334	548	82	175	72	1.13889	1	0.229286	7.38858e-14	0.146083	0.142223	4.42106e-22	0.181391	1	1	0.160235	4.42106e-22
30822			30604	-	-	predicted RNA	antisense: carA carB	458	662	112	131	115	0.973913	1	0.255584	1.04884e-11	0.767376	0.0648603	4.97693e-21	0.969469	1	0.146875	1.09892e-21	1.09892e-21
2734162			2734283	+	-	predicted RNA	antisense: ryfD	1360	2088	756	5293	2377	0.318048	0.013176	0.925001	0.00681487	1.11166e-21	0.279745	0.684848	0.831908	1	0.0445063	0.392323	1.11166e-21
3884223			3884256	+	-	predicted RNA	-	345	548	104	165	100	1.04	1	0.255459	5.89033e-12	0.681868	0.151821	1.82624e-21	0.569974	1	1	1.4758e-10	1.82624e-21
31039			30952	-	-	predicted RNA	antisense: carB	451	547	100	119	97	1.03093	1	0.194164	6.04304e-08	0.587081	0.0053001	1.31223e-20	0.934034	1	0.0147923	1.90948e-21	1.90948e-21
4180560	4180560	4180925	4180925	+	rplL	b3986	50S ribosomal subunit protein L7/L12	3875	5474	509	1797	738	0.689702	1	0.0403963	2.63541e-21	0.0625781	0.842546	0.000317519	0.939079	1	1	0.47292	2.63541e-21
4392472			4392547	+	glyX	b4164	Gly tRNA	526	889	132	315	168	0.785714	1	0.247868	4.59963e-13	0.240876	0.207288	2.69289e-21	0.28283	1	1	1.02184e-05	2.69289e-21
	1413740	1413531	1413453	-	rcbA	b1347	double-strand break reduction protein, Rac prophage	13	23	48	14	20	2.4	0.0514035	0.802027	0.244696	2.81766e-21	0.499604	0.388415	0.0406069	1	1	0.000382938	2.81766e-21
1800095	1799999	1799802	1799802	-	rpmI	b1717	50S ribosomal subunit protein L35	2472	4485	606	2085	936	0.647436	1	0.187284	3.01157e-21	0.00192665	0.475323	0.00475744	0.586941	1	1	0.839117	3.01157e-21
2947387			2947463	+	metZ	b2814	Met tRNA	281	960	177	219	181	0.977901	1	0.654495	2.50759e-08	0.694158	0.672853	3.95619e-21	0.876203	0.408664	1	9.41812e-19	3.95619e-21
2033649			2033739	+	rseX	b4603	-	10	11	35	15	12	2.91667	7.69859e-09	0.820985	0.0261264	8.69292e-21	0.953569	0.346576	0.787053	1	1	0.135872	8.69292e-21
1051320	1051461	1051673	1051680	+	cspG	b0990	cold shock protein homolog, cold-inducible	15	1323	255	475	228	1.11842	1	1.28694e-07	2.14418e-11	0.198177	4.77585e-06	1.01008e-20	0.141528	1.82778e-16	0.000250917	0.00299113	1.01008e-20
4245351			4245434	+	-	predicted RNA	antisense: malE	93	169	81	434	74	1.09459	1	0.589193	0.222075	1.05285e-06	0.664978	0.00963914	1.24738e-20	1	1	0.537787	1.24738e-20
1016475	1016470	1015952	1015649	-	fabA	b0954	beta-hydroxydecanoyl thioester dehydrase	310	795	140	262	135	1.03704	1	0.674864	2.69944e-14	0.140235	0.500554	1.5878e-20	0.194442	1	1	0.00486454	1.5878e-20
	3884816	3885073	3885075	+	yidD	b4557	membrane protein insertion efficiency factor, inner membrane protein, UPF0161 family	234	535	92	149	94	0.978723	1	0.749824	3.63858e-11	0.703403	0.459516	1.6061e-20	0.604398	1	1	1.85176e-09	1.6061e-20
2533764	2533764	2534021	2534060	+	ptsH	b2415	phosphohistidinoprotein-hexose phosphotransferase component of PTS system (Hpr)	1125	1378	205	837	373	0.549598	0.813965	0.00690758	1.80587e-20	5.69492e-06	0.371141	1.73085e-05	0.137529	1	1	0.447032	1.80587e-20
4245735			4245746	+	-	predicted RNA	antisense: malE	110	175	119	440	96	1.23958	1	0.643255	0.115295	2.60042e-09	0.854387	0.00652511	2.11086e-20	1	1	0.247848	2.11086e-20
2745918	2745918	2745370	2745343	-	rimM	b2608	16S rRNA processing protein	1649	2690	286	990	423	0.676123	1	0.143682	2.27185e-20	0.032959	0.816564	0.00109657	0.929582	1	1	0.666301	2.27185e-20
4179885	4179996	4180493	4180531	+	rplJ	b3985	50S ribosomal subunit protein L10	3006	4594	415	1445	607	0.68369	1	0.0975211	2.4504e-20	0.0892289	0.843933	0.000853738	0.831908	1	1	0.400387	2.4504e-20
1134176			1131063	-	-	predicted RNA	antisense: flgF flgE flgB flgD flgC	652	1065	85	270	77	1.1039	1	0.18066	2.72266e-18	0.229048	0.203546	2.50193e-20	0.478354	1	1	0.262644	2.50193e-20
2734295			2734153	-	ryfD	b4609	-	1210	1917	701	4838	2239	0.313086	0.013176	0.821264	0.00985062	4.11555e-20	0.263641	0.688747	0.831908	1	0.134226	0.408205	4.11555e-20
4392582			4392328	-	-	predicted RNA	antisense: glyX glyV	427	977	143	331	171	0.836257	1	0.469851	6.42161e-19	0.0905669	0.443227	5.08692e-20	0.261577	1	1	0.000367753	5.08692e-20
3452926	3452926	3452297	3452297	-	rplC	b3320	50S ribosomal subunit protein L3	2504	3492	322	1191	566	0.568905	1	0.049241	7.07896e-20	0.0598672	0.842614	0.0283559	0.831908	1	1	0.654711	7.07896e-20
3410472			3410350	-	-	predicted RNA	antisense: dusB	251	577	105	214	112	0.9375	1	0.662145	1.67136e-08	0.427512	0.409059	7.37699e-20	0.254685	1	1	4.33295e-05	7.37699e-20
1746516			1746592	+	valW	b1666	Val tRNA	58	111	52	37	45	1.15556	1	0.564584	0.0632598	0.00340994	0.858884	0.00132056	0.158673	1	1	7.39833e-20	7.39833e-20
1799801			1799757	-	-	predicted RNA	-	2293	4000	537	1854	858	0.625874	1	0.231139	7.77959e-20	0.00340994	0.404036	8.16638e-13	0.10717	1	1	0.029943	7.77959e-20
3211002			3211043	+	-	predicted RNA	-	522	1090	152	429	197	0.771574	1	0.314567	6.47182e-16	0.0953205	0.385894	1.23734e-19	0.18282	1	1	4.96348e-05	1.23734e-19
2947613			2947400	-	-	predicted RNA	antisense: metW metV metZ	365	1359	202	315	241	0.838174	1	0.767837	1.37836e-19	0.532721	0.916177	1.36342e-19	0.776407	1	1	4.29255e-11	1.36342e-19
1967047	1967037	1966393	1966393	-	cheZ	b1881	chemotaxis regulator, protein phosphatase for CheY	302	416	74	111	73	1.0137	1	0.142341	4.2616e-13	0.567005	0.0463263	2.12904e-19	0.59902	1	1	1.27009e-07	2.12904e-19
30215			29678	-	-	predicted RNA	antisense: carA	457	677	114	140	120	0.95	1	0.128233	9.88407e-16	0.854143	0.0853135	2.90492e-19	0.841083	1	0.850703	1.08234e-13	2.90492e-19
2663425	2663442	2664245	2664245	+	suhB	b2533	inositol monophosphatase	136	332	71	99	59	1.20339	1	0.901875	6.10261e-09	0.65244	0.494756	4.449e-19	0.485385	1	1	9.55968e-06	4.449e-19
297206			297254	+	ptwF	b4629	Xaa tRNA	25	31	65	29	26	2.5	0.0514035	0.45742	0.176565	5.01165e-19	0.510402	0.523703	0.191075	1	1	0.0017714	5.01165e-19
1946356	1946180	1946115	1946064	-	yobI	b4677	uncharacterized protein	13	14	46	21	24	1.91667	0.392438	0.805485	0.01156	5.01165e-19	0.498601	0.696434	0.00259917	1	1	0.241496	5.01165e-19
3474572	3474552	3474178	3474157	-	rpsL	b3342	30S ribosomal subunit protein S12	2384	3492	399	1407	630	0.633333	1	0.0874184	5.68437e-19	0.0195561	0.816343	0.0103782	0.987155	1	1	0.822424	5.68437e-19
2740077	2740069	2738948	2738590	-	tyrA	b2600	fused chorismate mutase T/prephenate dehydrogenase	137	241	291	1135	438	0.664384	1	0.061844	0.617949	0.221975	3.1886e-05	0.925157	0.844535	1	5.85909e-19	0.0231277	5.85909e-19
3451364	3451364	3450543	3450527	-	rplB	b3317	50S ribosomal subunit protein L2	2117	2784	258	998	491	0.525458	1	0.0358528	1.00326e-18	0.0518727	0.842614	0.0704505	0.831908	1	1	0.850243	1.00326e-18
758356			758307	-	-	predicted RNA	antisense: sdhB	306	531	84	219	126	0.666667	1	0.21026	1.24609e-18	0.0459456	0.39865	2.6718e-10	0.547537	1	1	6.89981e-05	1.24609e-18
3322158			3322072	-	leuU	b3174	Leu tRNA	90	317	80	73	70	1.14286	1	0.58582	0.000612623	0.228336	0.679058	5.75572e-12	0.851208	1	1	1.66618e-18	1.66618e-18
2745342	2745339	2744572	2744531	-	trmD	b2607	tRNA m(1)G37 methyltransferase, SAM-dependent	1172	1904	208	680	304	0.684211	1	0.168445	1.81603e-18	0.0536604	0.816564	0.0015746	0.998595	1	1	0.513134	1.81603e-18
3308023	3307933	3307853		-	yrbN	b4685	uncharacterized protein	83	512	83	190	95	0.873684	1	0.569725	2.25008e-10	0.360395	0.501739	1.8323e-18	0.355507	1	1	2.96502e-06	1.8323e-18
1800875			1800885	+	-	predicted RNA	antisense: thrS	370	595	128	415	179	0.715084	0.938112	0.167806	2.47379e-18	1.55206e-06	0.494862	1.49406e-05	0.202273	1	1	0.0518599	2.47379e-18
2005303	2005303	2005713		+	fliS	b1925	flagellar protein potentiates polymerization	339	501	88	145	92	0.956522	1	0.239321	2.46422e-12	0.509719	0.156687	2.49453e-18	0.56683	1	1	4.27787e-07	2.49453e-18
33796			33777	-	-	predicted RNA	antisense: carB	382	571	116	164	152	0.763158	1	0.226831	2.71843e-12	0.990207	0.38669	3.21128e-09	0.798498	1	0.453642	3.57008e-18	3.57008e-18
2001069	2001024	2000473	2000386	-	fliZ	b1921	RpoS antagonist; putative regulator of FliA activity	344	469	88	157	85	1.03529	1	0.0874184	1.36218e-11	0.290525	0.058169	3.76e-18	0.344652	1	1	0.000309799	3.76e-18
4100775			4100790	+	-	predicted RNA	-	1043	1231	195	726	284	0.68662	1	0.0106858	3.82576e-18	0.000158053	0.156687	1.40976e-10	0.0414968	1	1	0.0261304	3.82576e-18
2004730			2003994	-	-	predicted RNA	antisense: fliD	525	690	111	176	123	0.902439	1	0.043395	3.31996e-17	0.317917	0.0787438	3.74609e-15	0.638748	1	1	1.07261e-05	3.31996e-17
779067	779067	779588	779591	+	pal	b0741	peptidoglycan-associated outer membrane lipoprotein	833	1004	162	495	254	0.637795	0.91168	0.0162449	3.44973e-17	0.00273128	0.390522	0.000252852	0.441025	1	1	0.411472	3.44973e-17
4245811			4245988	+	-	predicted RNA	antisense: malE	125	181	108	499	96	1.125	1	0.623599	0.31374	1.51906e-05	0.874219	0.0465675	4.94129e-17	1	1	0.403301	4.94129e-17
3410243	3410280	3411245	3411270	+	dusB	b3260	tRNA-dihydrouridine synthase B	270	553	96	177	94	1.02128	1	0.290917	2.65176e-14	0.124208	0.385894	6.65534e-17	0.2686	0.808493	1	0.0211516	6.65534e-17
	1223163	1222990		-	ymgI	b4593	uncharacterized protein	14	18	42	15	20	2.1	0.107729	0.785361	0.188504	6.84009e-17	0.498604	0.653228	0.0352618	1	1	0.0114597	6.84009e-17
2014802			2014660	-	-	predicted RNA	antisense: fliF	197	599	112	137	122	0.918033	1	0.50208	2.40319e-08	0.73845	0.463369	8.41285e-16	0.981996	0.0599768	1	7.42538e-17	7.42538e-17
3446152	3446140	3445607	3445607	-	rplF	b3305	50S ribosomal subunit protein L6	1927	2623	299	1096	551	0.54265	1	0.0725924	7.69013e-17	0.0223136	0.826576	0.127809	0.831908	1	1	0.982559	7.69013e-17
4392845	4392892	4392945	4392947	+	yjeV	b4670	uncharacterized protein	24	35	44	25	27	1.62963	0.797872	0.485746	0.764193	8.65938e-17	0.505903	0.438144	0.000449048	1	1	7.69526e-10	8.65938e-17
1051681			1051731	+	-	predicted RNA	-	16	751	150	214	146	1.0274	1	0.179328	2.17449e-06	0.867652	0.0662623	9.90898e-17	0.755359	0.339913	0.166073	2.03464e-11	9.90898e-17
2644893	2644864	2644433	2644393	-	ndk	b2518	multifunctional nucleoside diphosphate kinase and apyrimidinic endonuclease and 3'-phosphodiesterase	308	469	79	186	90	0.877778	1	0.24376	2.70891e-13	0.0913908	0.264814	1.75682e-16	0.167898	1	1	0.0045599	1.75682e-16
448596			448900	+	-	predicted RNA	antisense: cyoC cyoB	478	743	115	244	174	0.66092	1	0.193295	3.21343e-16	0.169724	0.405556	2.73274e-10	0.678037	1	1	9.29272e-05	3.21343e-16
1972691	1972691	1971030	1970992	-	tar	b1886	methyl-accepting chemotaxis protein II	496	549	78	192	83	0.939759	1	0.00775793	3.44242e-16	0.0798825	0.0300183	5.43278e-13	0.333846	1	1	0.278202	3.44242e-16
4175754			4175829	+	thrT	b3979	Thr tRNA	765	620	94	226	124	0.758065	1	0.000219459	4.45606e-12	0.27973	5.15156e-06	3.64114e-16	0.466966	1	0.097075	3.45833e-06	3.64114e-16
3561998			3562007	+	-	predicted RNA	-	195	539	131	453	208	0.629808	0.404654	0.490745	5.40835e-16	5.2843e-09	0.512901	0.0049533	0.38803	1	1	0.164124	5.40835e-16
1555823			1555812	-	-	predicted RNA	-	127	92	220	723	394	0.558376	0.938112	0.499381	0.176814	0.00156647	0.802366	0.000320893	0.524749	1	1	6.28657e-16	6.28657e-16
32193			31615	-	-	predicted RNA	antisense: carB	477	629	111	147	120	0.925	1	0.0796251	2.48814e-14	0.692912	0.0623749	9.60461e-16	0.812277	1	0.984704	1.2728e-09	9.60461e-16
1292943	1292922	1292509	1292476	-	hns	b1237	global DNA-binding transcriptional dual regulator H-NS	947	1255	211	787	330	0.639394	0.890751	0.0692467	1.12761e-15	6.57298e-05	0.425606	0.000893347	0.2917	1	1	0.958037	1.12761e-15
190756	190857	191708	191708	+	tsf	b0170	translation elongation factor EF-Ts	871	1179	161	451	229	0.703057	1	0.0884683	1.26738e-15	0.0518727	0.813798	0.00326613	0.828895	1	1	0.390732	1.26738e-15
202363			202204	-	-	predicted RNA	antisense: fabZ	279	540	99	232	110	0.9	1	0.535796	1.13436e-08	0.222851	0.402809	1.90761e-15	0.178875	1	1	0.00122352	1.90761e-15
3445233	3445229	3444726	3444726	-	rpsE	b3303	30S ribosomal subunit protein S5	1770	2382	297	907	483	0.614907	1	0.0893931	2.31743e-15	0.0579494	0.816343	0.0426075	0.827636	1	1	0.478637	2.31743e-15
3915972	3915972	3915553	3915526	-	atpC	b3731	F1 sector of membrane-bound ATP synthase, epsilon subunit	589	844	144	403	178	0.808989	1	0.11571	2.51612e-15	0.00651663	0.279745	9.9657e-12	0.0582385	1	1	0.242273	2.51612e-15
3332846			3333491	+	-	predicted RNA	antisense: rpmA rplU	1366	2141	252	725	316	0.797468	1	0.191224	2.77649e-15	0.109054	0.991377	2.77544e-05	0.756239	1	1	0.366842	2.77649e-15
3720262			3720295	+	-	predicted RNA	-	44	1619	275	890	349	0.787966	1	0.263974	1.5793e-09	0.0294827	0.277213	3.68785e-15	0.00763393	4.39591e-08	1	0.0320536	3.68785e-15
961919			961968	+	-	predicted RNA	-	980	1410	197	633	332	0.593373	1	0.143809	3.98051e-15	0.0299804	0.352766	1.83895e-11	0.317426	1	1	0.00261658	3.98051e-15
4215415			4215463	+	-	predicted RNA	-	405	665	213	1433	1570	0.135669	3.98897e-15	0.664685	0.0176643	3.47441e-12	0.985992	0.551091	0.840601	1	1	0.745098	3.98897e-15
	1465230	1465165		-	ynbG	b4674	uncharacterized protein	6	12	30	11	14	2.14286	1.77835e-13	0.832495	0.346919	4.66487e-15	0.587208	0.0230402	0.748984	1	1	0.0192132	4.66487e-15
3474156	3474081	3473542	3473542	-	rpsG	b3341	30S ribosomal subunit protein S7	2314	3370	358	1227	575	0.622609	1	0.161426	7.29112e-15	0.0841999	0.837643	0.0343431	0.831908	1	1	0.752237	7.29112e-15
1969364	1969364	1968504	1968504	-	cheR	b1884	chemotaxis regulator, protein-glutamate methyltransferase	163	313	65	108	62	1.04839	1	0.551032	1.22382e-09	0.341925	0.43107	8.52532e-15	0.422346	1	1	0.000853093	8.52532e-15
4836			4121	-	-	predicted RNA	antisense: thrC	525	677	117	203	180	0.65	0.946927	0.0672332	9.10719e-15	0.182654	0.409059	0.000389617	0.926957	1	1	0.0019936	9.10719e-15
451639	451610	450663	450642	-	cyoA	b0432	cytochrome o ubiquinol oxidase subunit II	634	865	132	301	196	0.673469	1	0.11732	1.4659e-14	0.0981968	0.793513	0.0158046	0.962912	1	1	0.2307	1.4659e-14
1862528	1862771	1863766	1863766	+	gapA	b1779	glyceraldehyde-3-phosphate dehydrogenase A	2290	2295	228	797	399	0.571429	1	0.00422735	1.75386e-14	0.113071	0.85675	0.0599528	0.831908	1	1	0.744563	1.75386e-14
3449169	3449169	3448759		-	rplP	b3313	50S ribosomal subunit protein L16	2298	3182	388	1204	605	0.641322	1	0.133066	1.75386e-14	0.0718949	0.819951	0.0258474	0.831908	1	1	0.591676	1.75386e-14
757674	757689	758405	758405	+	sdhB	b0724	succinate dehydrogenase, FeS subunit	339	588	104	225	139	0.748201	1	0.229286	3.65253e-14	0.0536604	0.464712	5.05536e-07	0.480717	1	1	0.0749142	3.65253e-14
4200216	4200281	4200553	4200553	+	hupA	b4000	HU, DNA-binding transcriptional regulator, alpha subunit	986	1285	228	804	331	0.688822	1	0.0778705	4.28734e-14	0.000174582	0.371141	1.39087e-06	0.0566362	1	1	0.461745	4.28734e-14
2270159			2269881	-	-	predicted RNA	antisense: mepS	333	686	136	428	141	0.964539	1	0.69556	1.1556e-09	0.00333587	0.45109	4.78141e-14	0.000560413	1	1	0.265849	4.78141e-14
2691340			2691157	-	glmY	b4441	-	403	1195	624	3609	1013	0.615992	0.924768	0.187284	0.171213	5.36868e-12	0.00470763	0.721043	0.240458	1	5.80182e-14	0.208623	5.80182e-14
710753			710736	-	-	predicted RNA	-	339	552	113	320	155	0.729032	1	0.233626	5.88862e-14	0.00338805	0.413047	1.17104e-07	0.261157	1	1	0.0153616	5.88862e-14
696504			696430	-	glnX	b0664	Gln tRNA	154	323	83	85	89	0.932584	1	0.644207	0.000397425	0.38707	0.752441	2.00938e-07	0.779655	1	1	6.28978e-14	6.28978e-14
2269863			2269886	+	-	predicted RNA	-	163	529	100	268	119	0.840336	1	0.85488	7.21614e-14	0.0211124	0.981372	5.89015e-13	0.10717	1	1	0.00355684	7.21614e-14
4058637			4058428	-	-	predicted RNA	antisense: typA	479	828	131	330	197	0.664975	1	0.325334	7.38858e-14	0.0822022	0.445445	5.30299e-10	0.491237	1	1	0.00296517	7.38858e-14
1437121			1437229	+	micC	b4427	-	17	14	42	17	18	2.33333	0.177298	0.459801	0.00369536	8.08935e-14	0.510944	0.828903	0.176948	1	1	0.327444	8.08935e-14
	1418008	1417838		-	ydaE	b4526	Rac prophage; conserved protein	15	19	41	16	20	2.05	0.130621	0.779232	0.255488	1.05314e-13	0.499604	0.514607	0.0794297	1	1	0.00767278	1.05314e-13
2448			1761	-	-	predicted RNA	antisense: thrA	505	697	124	201	204	0.607843	0.797872	0.133209	1.07988e-13	0.256701	0.462232	0.00707635	0.853477	1	1	0.00059222	1.07988e-13
447493			447942	+	-	predicted RNA	antisense: cyoE cyoD	423	705	127	233	170	0.747059	1	0.237627	1.75388e-13	0.19827	0.439783	1.43681e-08	0.685239	1	1	0.000914731	1.75388e-13
3599564			3599695	+	-	predicted RNA	antisense: livJ	526	665	99	267	180	0.55	1	0.114959	1.91292e-13	0.113316	0.390522	1.26811e-07	0.689684	1	1	0.000331022	1.91292e-13
4246100			4246352	+	-	predicted RNA	antisense: malE	128	186	103	463	95	1.08421	1	0.537006	0.253605	7.30737e-06	0.741084	0.0459063	2.06829e-13	1	0.706133	0.401834	2.06829e-13
1641686	1641554	1641339	1641107	-	cspB	b1557	Qin prophage; cold shock protein	12	1049	254	801	313	0.811502	1	2.34785e-08	8.23571e-07	0.00157316	4.7818e-12	9.51152e-06	0.0100348	1.76405e-07	2.36433e-13	0.465249	2.36433e-13
3922051	3922051	3921236	3921236	-	atpB	b3738	F0 sector of membrane-bound ATP synthase, subunit a	544	732	128	372	179	0.715084	1	0.13001	2.64749e-13	0.00775723	0.434643	0.000932953	0.483417	1	1	0.6036	2.64749e-13
3965716			3965730	+	-	predicted RNA	-	356	573	126	351	185	0.681081	1	0.239321	3.04602e-13	0.00214401	0.498604	1.41081e-05	0.425857	1	1	0.0239008	3.04602e-13
922347			922336	-	-	predicted RNA	-	90	78	132	568	167	0.790419	1	0.472821	0.787947	3.21281e-13	0.494756	0.345725	0.00059747	1	1	3.50952e-13	3.21281e-13
4543666			4543679	+	-	predicted RNA	-	649	454	115	501	203	0.566502	0.450513	4.07912e-06	7.87324e-12	4.03284e-13	0.259836	0.00652511	0.0330173	1	1	0.41825	4.03284e-13
4059788			4059771	-	-	predicted RNA	antisense: typA	384	587	120	241	163	0.736196	1	0.225216	4.32597e-13	0.199586	0.390522	3.43072e-08	0.746867	1	1	7.49234e-06	4.32597e-13
762740			762967	+	-	predicted RNA	-	573	942	163	359	238	0.684874	1	0.30048	4.47596e-13	0.120542	0.472005	1.38784e-08	0.586941	1	1	0.00267812	4.47596e-13
2430575			2430727	+	-	predicted RNA	antisense: cvpA	314	600	118	295	131	0.900763	1	0.656578	1.75152e-07	0.145959	0.441987	5.19717e-13	0.0849765	1	1	0.0143449	5.19717e-13
1292548			1292938	+	-	predicted RNA	antisense: hns	1006	1289	234	806	342	0.684211	1	0.0984412	5.7214e-13	0.000407563	0.410692	0.000702173	0.277718	1	1	0.999373	5.7214e-13
1136270	1136274	1137371		+	flgI	b1080	putative flagellar basal body protein	120	241	62	78	51	1.21569	1	0.997479	4.75603e-06	0.774769	0.478145	5.82445e-13	0.548674	1	1	0.000174292	5.82445e-13
758144			757173	-	-	predicted RNA	antisense: sdhB sdhA	351	654	114	260	160	0.7125	1	0.282912	6.36093e-13	0.060833	0.498601	0.00311635	0.621216	1	1	0.278688	6.36093e-13
2062260			2062335	+	asnV	b1989	Asn tRNA	20	26	51	22	28	1.82143	0.678318	0.764322	0.264588	7.17205e-13	0.502101	0.926589	0.00903649	1	1	0.00634744	7.17205e-13
	2021088	2021501	2021501	+	fliN	b1946	flagellar motor switching and energizing component	182	389	71	105	83	0.855422	1	0.707351	2.6085e-10	0.792971	0.507232	7.26841e-13	0.831902	1	1	1.6701e-09	7.26841e-13
1146589			1146757	+	psrD	b4418	-	154	304	76	157	70	1.08571	1	0.703511	0.000386733	0.423408	0.395719	7.68935e-13	0.0651908	1	1	0.0157478	7.68935e-13
	1413927	1413733		-	ralR	b1348	Rac prophage; restriction alleviation protein	16	21	38	15	22	1.72727	0.160734	0.749824	0.31374	8.43801e-13	0.501123	0.52259	0.0089368	1	1	0.000859405	8.43801e-13
1151531			1151581	+	-	predicted RNA	-	1102	1959	303	1116	473	0.640592	1	0.3488	8.43867e-13	0.00325284	0.490958	6.81596e-10	0.052832	1	1	0.0717814	8.43867e-13
3442559	3442471	3442115	3442099	-	rpsM	b3298	30S ribosomal subunit protein S13	2345	3532	453	1480	714	0.634454	1	0.217997	1.07153e-12	0.0546469	0.809864	0.0513092	0.831908	1	1	0.899265	1.07153e-12
779598			778841	-	-	predicted RNA	antisense: ybgF tolB pal	798	1012	165	492	252	0.654762	1	0.109014	1.35813e-12	0.0165646	0.796948	0.0481901	0.811694	1	1	0.786632	1.35813e-12
2518116			2518041	-	alaX	b2396	Ala tRNA	219	495	118	163	108	1.09259	1	0.656578	0.00019953	0.831817	0.475323	1.44692e-12	0.721451	1	1	4.69939e-08	1.44692e-12
2798505	2798495	2798091	2797870	-	stpA	b2669	DNA binding protein, nucleoid-associated	432	159	54	94	52	1.03846	1	2.60899e-05	0.0150612	0.593041	1.6466e-12	3.52711e-05	0.436834	1	0.00249697	0.0588591	1.6466e-12
4175673			4175747	+	glyT	b3978	Gly tRNA	711	611	104	240	139	0.748201	1	0.00753207	3.63644e-09	0.328501	0.000543332	1.68681e-12	0.507385	1	0.396242	4.58977e-05	1.68681e-12
2021502	2021504	2021869		+	fliO	b1947	flagellar biosynthesis protein	127	317	77	91	69	1.11594	1	0.57135	2.34501e-05	0.805317	0.715894	2.0755e-12	0.817115	1	1	6.63644e-09	2.0755e-12
2100620			2100648	+	-	predicted RNA	antisense: gnd	489	605	113	263	172	0.656977	1	0.110661	2.42806e-12	0.129286	0.37695	1.89845e-06	0.742502	1	1	0.000172409	2.42806e-12
3679192	3679187	3678420	3678351	-	yhjH	b3525	cyclic-di-GMP phosphodiesterase, FlhDC-regulated	397	474	102	154	98	1.04082	1	0.160922	7.24369e-09	0.403321	0.0701997	2.93418e-12	0.517028	1	1	0.00144959	2.93418e-12
4200529			4200199	-	-	predicted RNA	antisense: hupA	925	1259	238	813	341	0.697947	1	0.158245	4.45606e-12	0.00038604	0.409059	0.000198032	0.178875	1	1	0.804702	4.45606e-12
2441736	2441605	2440385	2440362	-	fabB	b2323	3-oxoacyl-[acyl-carrier-protein] synthase I	150	369	160	115	73	2.19178	0.274757	0.440085	0.335551	0.305067	0.663315	5.8038e-12	0.517028	1	1	0.00264243	5.8038e-12
2521173			2521248	+	valY	b2403	Val tRNA	208	498	107	145	111	0.963964	1	0.659674	1.57565e-05	0.795948	0.574016	5.84034e-12	0.859131	1	1	7.75553e-11	5.84034e-12
202550			202516	-	-	predicted RNA	antisense: fabZ	331	562	109	269	156	0.698718	1	0.284404	6.58603e-12	0.0744425	0.470469	7.36059e-07	0.586941	1	1	0.00118064	6.58603e-12
1975648			1975706	+	-	predicted RNA	antisense: motB	246	594	113	168	164	0.689024	1	0.68076	2.22494e-07	0.942508	0.982067	1.08538e-07	0.841083	1	1	7.08666e-12	7.08666e-12
987948			988137	+	-	predicted RNA	antisense: asnS	392	579	104	280	129	0.806202	1	0.325226	1.65058e-09	0.07745	0.371141	7.53407e-12	0.138212	1	1	0.0169174	7.53407e-12
2003831	2003872	2005278	2005302	+	fliD	b1924	flagellar filament capping protein	426	536	90	140	90	1	1	0.142341	3.89114e-11	0.279998	0.151184	8.75534e-12	0.526572	1	1	0.00426851	8.75534e-12
4059702			4058802	-	-	predicted RNA	antisense: typA	467	728	129	290	180	0.716667	1	0.230436	8.83492e-12	0.0784407	0.777974	0.00734138	0.651639	1	1	0.290479	8.83492e-12
1637791	1637782	1637609	1637516	-	gnsB	b1550	Qin prophage; multicopy suppressor of secG(Cs) and fabA6(Ts)	111	193	55	117	43	1.27907	0.957184	0.667081	0.00458981	0.419015	0.390522	9.05204e-12	0.0102554	1	1	0.0529479	9.05204e-12
202026	202101	202556	202559	+	fabZ	b0180	(3R)-hydroxymyristol acyl carrier protein dehydratase	282	476	87	213	121	0.719008	1	0.357706	9.35195e-12	0.0492475	0.48954	1.53712e-08	0.374218	1	1	0.0353447	9.35195e-12
3377259			3377460	+	-	predicted RNA	antisense: sspA	400	660	110	345	148	0.743243	1	0.328468	1.05075e-11	0.0142256	0.390522	1.51366e-11	0.0565411	1	1	0.0554856	1.05075e-11
597464	597479	598702	598702	+	cusB	b0574	copper/silver efflux system, membrane fusion protein	297	401	76	126	102	0.745098	1	0.166302	1.16621e-11	0.207957	0.408627	0.000135585	0.827429	1	1	0.00732021	1.16621e-11
4132573	4132616	4133506	4133514	+	metF	b3941	5,10-methylenetetrahydrofolate reductase	231	190	52	80	42	1.2381	1	0.0740921	4.74744e-05	0.507048	0.000285136	1.33224e-11	0.293577	1	1	0.00846845	1.33224e-11
	448046	447717	447715	-	cyoD	b0429	cytochrome o ubiquinol oxidase subunit IV	412	633	116	225	155	0.748387	1	0.285265	1.4585e-11	0.235628	0.417677	3.52878e-09	0.643533	1	1	0.000514146	1.4585e-11
1526902	1526940	1527152	1527152	+	yncH	b1455	IPR020099 family protein	4	13	36	14	12	3	0.00238782	0.879424	0.116274	1.59611e-11	0.461182	0.418009	0.667883	1	1	0.135398	1.59611e-11
1556016			1556006	-	-	predicted RNA	-	161	158	240	910	440	0.545455	0.865686	0.507773	0.500771	4.61049e-05	0.472816	0.020402	0.344652	1	1	1.94646e-11	1.94646e-11
3447452	3447438	3446899	3446885	-	rplE	b3308	50S ribosomal subunit protein L5	2840	4043	436	1665	812	0.536946	1	0.217064	2.1952e-11	0.0825915	0.453309	0.178923	0.831908	1	1	0.92343	2.1952e-11
286789	286789	288399		+	yagH	b0271	CP4-6 prophage; putative xylosidase/arabinosidase	6	17	38	10	13	2.92308	0.00307156	0.877978	0.538002	2.2119e-11	0.475323	0.276978	0.569974	1	1	0.0344117	2.2119e-11
2905504	2905557	2905697	2905697	+	yqcG	b4682	uncharacterized protein	22	21	47	20	27	1.74074	0.130621	0.740068	0.218933	2.25952e-11	0.501807	0.814057	0.0352618	1	1	0.0385909	2.25952e-11
850931			850434	-	-	predicted RNA	antisense: ompX	1257	1552	259	1267	486	0.532922	0.905409	0.129201	3.71525e-11	2.31612e-06	0.474298	0.326774	0.831908	1	1	0.705992	3.71525e-11
1770372			1770477	+	rprA	b4431	-	10	24	57	25	26	2.19231	0.0218167	0.856638	0.176814	3.90236e-11	0.470448	0.550763	0.371938	1	1	0.0633222	3.90236e-11
3442098	3442098	3441709	3441709	-	rpsK	b3297	30S ribosomal subunit protein S11	2334	3095	419	1367	707	0.592645	1	0.18066	4.32059e-11	0.0569214	0.816564	0.156375	0.828895	1	1	0.996271	4.32059e-11
	356171	357454	357835	+	codA	b0337	cytosine/isoguanine deaminase	257	301	71	72	64	1.10938	1	0.195999	3.02671e-07	0.898693	0.0900731	4.49857e-11	0.892117	1	0.565039	1.13085e-08	4.49857e-11
754654			754644	-	-	predicted RNA	-	343	570	150	307	274	0.547445	0.408681	0.288845	1.10855e-10	0.0857758	0.870243	0.011619	0.843017	1	1	0.000456976	1.10855e-10
511202			511287	+	-	predicted RNA	antisense: copA	400	549	88	235	157	0.56051	1	0.187284	1.14082e-10	0.15229	0.390522	4.24088e-08	0.618603	1	1	0.000560875	1.14082e-10
449172			449700	+	-	predicted RNA	antisense: cyoB	481	659	132	235	205	0.643902	1	0.18701	1.17801e-10	0.196922	0.500697	0.00187377	0.9156	1	1	0.00791289	1.17801e-10
3965731	3965761	3966090	3966416	+	trxA	b3781	thioredoxin 1	662	1023	206	612	323	0.637771	1	0.239321	1.20527e-10	0.00311502	0.772835	0.00202372	0.355507	1	1	0.42516	1.20527e-10
2521253			2521328	+	lysV	b2404	Lys tRNA	96	258	79	77	65	1.21538	1	0.586718	0.00431909	0.341318	0.8435	2.08817e-08	0.979216	1	1	1.37201e-10	1.37201e-10
1323141	1323082	1323038	1323004	-	trpL	b1265	trp operon leader peptide	29	31	86	39	43	2	0.348548	0.790225	0.0251108	1.45298e-10	0.500554	0.843874	0.16783	1	1	0.339474	1.45298e-10
1863742			1862644	-	-	predicted RNA	antisense: gapA	2072	2081	225	748	383	0.587467	1	0.0282206	1.63423e-10	0.165896	0.856164	0.104648	0.831908	1	1	0.855215	1.63423e-10
	294799	293945		-	yagM	b0279	CP4-6 prophage; uncharacterized protein	10	21	43	12	15	2.86667	0.000516885	0.383573	0.550545	1.6417e-10	0.494756	0.17564	0.666296	1	1	0.0244305	1.6417e-10
202831			202742	-	-	predicted RNA	antisense: lpxA	325	571	118	259	146	0.808219	1	0.383573	3.70676e-06	0.350671	0.390522	1.69128e-10	0.39737	1	1	0.00243895	1.69128e-10
4060085			4060025	-	-	predicted RNA	antisense: typA	376	545	99	238	129	0.767442	1	0.263974	5.36865e-09	0.237329	0.357069	1.94239e-10	0.484572	1	1	0.000236449	1.94239e-10
1195027			1195066	+	-	predicted RNA	-	917	1117	181	669	293	0.617747	1	0.126131	2.23031e-10	0.00687301	0.24107	1.50309e-09	0.04946	1	1	0.0622932	2.23031e-10
	285395	286777		+	yagG	b0270	CP4-6 prophage; putative sugar transporter	7	15	43	12	16	2.6875	0.0248636	0.879676	0.244696	3.47592e-10	0.472005	0.495699	0.499411	1	1	0.218573	3.47592e-10
455023			455132	+	-	predicted RNA	-	459	596	109	274	148	0.736486	1	0.245749	2.90026e-08	0.177936	0.311568	3.63375e-10	0.371938	1	1	0.00371692	3.63375e-10
3405277	3405436	3405906	3405906	+	accB	b3255	acetyl CoA carboxylase, BCCP subunit	402	536	108	238	144	0.75	1	0.191555	4.95997e-10	0.0784073	0.390522	3.17709e-07	0.446443	1	1	0.0519301	4.95997e-10
461715			461409	-	-	predicted RNA	antisense: hupB	581	915	188	698	304	0.618421	1	0.290917	5.17408e-10	5.62813e-05	0.844382	0.00119845	0.102583	1	1	0.697919	5.17408e-10
461411			461432	+	-	predicted RNA	-	343	635	131	470	202	0.648515	1	0.364191	5.80504e-10	0.000384562	0.860064	3.50505e-05	0.131054	1	1	0.12404	5.80504e-10
2100100			2100124	+	-	predicted RNA	antisense: gnd	548	583	120	270	187	0.641711	1	0.0699762	6.15479e-10	0.15229	0.367484	5.37644e-05	0.792894	1	1	0.000784504	6.15479e-10
	238736	238257		-	ykfM	b4586	lethality reduction protein, putative inner membrane protein	11	19	38	11	19	2	0.182119	0.419127	0.328375	6.52351e-10	0.494756	0.4131	0.161953	1	1	0.0260119	6.52351e-10
1031712			1031625	-	serT	b0971	Ser tRNA	30	69	54	31	38	1.42105	0.913974	0.488923	0.355476	2.59117e-05	0.500554	0.0504468	0.138212	1	1	7.4412e-10	7.4412e-10
3405865			3405587	-	-	predicted RNA	antisense: accB	496	622	119	283	167	0.712575	1	0.20283	7.6619e-10	0.0885275	0.385894	1.66287e-07	0.46764	1	1	0.0224147	7.6619e-10
4449777	4449652	4449122	4449122	-	ppa	b4226	inorganic pyrophosphatase	748	950	191	595	271	0.704797	1	0.175741	9.24431e-10	0.00317483	0.445445	0.00744334	0.426786	1	1	0.993718	9.24431e-10
4543679			4543005	-	-	predicted RNA	antisense: fimA	1142	677	143	726	256	0.558594	0.694757	6.05532e-07	4.98815e-09	9.36972e-10	0.395158	0.250618	0.409377	1	1	0.69707	9.36972e-10
3768177	3768177	3768638	3772255	+	yibG	b3596	TPR-like repeat protein	12	25	49	14	16	3.0625	0.000516885	0.393711	0.407067	1.05954e-09	0.500554	0.150293	0.755359	1	1	0.0218505	1.05954e-09
3664864			3664968	+	gadY	b4452	-	23	35	57	26	39	1.46154	0.754528	0.464747	0.438547	1.18414e-09	0.496448	0.689712	0.00416215	1	1	0.00184264	1.18414e-09
1802152			1802369	+	-	predicted RNA	antisense: thrS	387	666	124	333	172	0.72093	1	0.453421	1.22382e-09	0.047844	0.473385	2.23384e-08	0.2686	1	1	0.0432417	1.22382e-09
1975327	1975324	1973360	1973340	-	cheA	b1888	fused chemotactic sensory histidine kinase in two-component regulatory system with CheB and CheY: sensory histidine kinase/signal sensing protein	243	359	65	110	68	0.955882	1	0.249763	1.55627e-09	0.234637	0.38669	5.69507e-08	0.534828	1	1	0.0519301	1.55627e-09
4543021	4543115	4543663	4543665	+	fimA	b4314	major type 1 subunit fimbrin (pilin)	1226	688	153	758	279	0.548387	0.609681	3.16756e-07	2.54507e-08	1.57703e-09	0.371141	0.189111	0.288415	1	1	0.701769	1.57703e-09
	448660	448046		-	cyoC	b0430	cytochrome o ubiquinol oxidase subunit III	326	458	96	176	144	0.666667	1	0.227688	1.59087e-09	0.193774	0.500554	0.000277639	0.822826	1	1	0.0114687	1.59087e-09
4158394			4158285	-	oxyS	b4458	-	25	34	35	16	21	1.66667	0.802509	0.515578	0.611496	2.65085e-09	0.558763	0.158061	0.0306792	1	1	1.84064e-09	1.84064e-09
	4329360	4330238	4330501	+	yjcZ	b4110	YjcZ family protein, mutational suppressor of yhjH motility mutation	278	370	96	147	85	1.12941	1	0.284001	9.07206e-06	0.363877	0.301243	1.96899e-09	0.403684	1	1	0.0324884	1.96899e-09
1572061	1572045	1570645	1570645	-	gadB	b1493	glutamate decarboxylase B, PLP-dependent	71	45	168	213	302	0.556291	1	0.00422735	0.0308016	0.679723	2.09768e-09	1.36976e-07	0.869788	1	1	0.00230729	2.09768e-09
1999930			2000079	+	-	predicted RNA	antisense: fliY	447	562	115	262	141	0.815603	1	0.315638	7.15525e-07	0.243518	0.364994	2.36191e-09	0.400558	1	1	0.00504054	2.36191e-09
850447	850450	850965	851122	+	ompX	b0814	outer membrane protein X	1263	1622	271	1257	483	0.561077	1	0.198349	2.45665e-09	9.36611e-05	0.474306	0.304158	0.853709	1	1	0.707413	2.45665e-09
3922065			3922200	+	-	predicted RNA	antisense: atpI	357	537	117	264	137	0.854015	1	0.483687	8.43812e-06	0.272337	0.399991	3.52562e-09	0.317426	1	1	0.00979915	3.52562e-09
1015665			1015702	+	-	predicted RNA	-	81	246	488	1777	589	0.828523	1	0.552779	0.335597	0.00297279	0.365682	0.451625	0.000600729	1	0.33189	3.7436e-09	3.7436e-09
127839	127912	129336	129376	+	lpd	b0116	lipoamide dehydrogenase, E3 component is part of three enzyme complexes	668	989	132	354	185	0.713514	1	0.268141	4.4531e-09	0.199481	0.821046	0.0332912	0.828895	1	1	0.465249	4.4531e-09
2741188			2741164	-	-	predicted RNA	-	167	321	313	1792	449	0.697105	1	0.71073	0.583115	7.73295e-08	0.774899	0.849785	4.69368e-09	1	1	2.77734e-05	4.69368e-09
2700520			2700596	+	ohsC	b4608	-	15	14	32	19	19	1.68421	0.779341	0.469851	0.262453	5.26441e-09	0.500963	0.99362	0.0566362	1	1	0.119831	5.26441e-09
2942696			2942901	+	gcvB	b4443	-	48	139	70	50	35	2	0.185701	0.515918	0.240829	0.0707891	0.809528	5.28454e-09	0.796972	1	1	8.41564e-07	5.28454e-09
2312811			2312789	-	-	predicted RNA	-	427	793	174	448	282	0.617021	1	0.460757	5.38421e-09	0.0481658	0.982606	0.00028373	0.651224	1	1	0.0152007	5.38421e-09
779592	779598	780389	780553	+	ybgF	b0742	periplasmic TolA-binding protein	231	356	77	191	99	0.777778	1	0.301945	5.55461e-09	0.0205842	0.48928	4.48503e-06	0.214519	1	1	0.269959	5.55461e-09
461433	461451	461723	461723	+	hupB	b0440	HU, DNA-binding transcriptional regulator, beta subunit	614	1004	217	765	334	0.649701	1	0.373694	5.74436e-09	0.000162374	0.951459	0.00101843	0.0951851	1	1	0.630143	5.74436e-09
3110366			3110441	+	pheV	b2967	Phe tRNA	39	101	60	41	45	1.33333	1	0.509083	0.212861	0.0114235	0.502928	0.00477644	0.533534	1	1	5.8858e-09	5.8858e-09
554026			554399	+	-	predicted RNA	antisense: ppiB	530	601	126	362	179	0.703911	1	0.123033	5.88838e-09	0.0070276	0.363762	1.01151e-05	0.150308	1	1	0.29554	5.88838e-09
1343460	1346796	1346900	1360955	+	ymiB	b4672	uncharacterized protein	12	22	42	20	20	2.1	0.366137	0.805485	0.333844	6.08006e-09	0.499604	0.605194	0.316654	1	1	0.0260904	6.08006e-09
455133	455133	456431	456470	+	tig	b0436	peptidyl-prolyl cis/trans isomerase (trigger factor)	654	854	126	334	172	0.732558	1	0.222656	6.7702e-09	0.152394	0.811512	0.0249291	0.883376	1	1	0.483447	6.7702e-09
3449885	3449883	3449182	3449170	-	rpsC	b3314	30S ribosomal subunit protein S3	2203	2869	342	1154	563	0.60746	1	0.226406	8.72213e-09	0.146504	0.836488	0.133363	0.831908	1	1	0.954172	8.72213e-09
3448149	3448149	3447778	3447768	-	rplN	b3310	50S ribosomal subunit protein L14	2633	3631	498	1709	845	0.589349	1	0.24376	9.15254e-09	0.0731425	0.461182	0.230527	0.831908	1	1	0.804986	9.15254e-09
	2021869	2022606	2022615	+	fliP	b1948	flagellar biosynthesis protein	75	201	61	57	62	0.983871	1	0.453421	0.000504892	0.538466	0.496948	1.83497e-05	0.8186	1	1	9.15375e-09	9.15375e-09
3032816	3032817	3032942	3032949	+	yqfG	b4684	uncharacterized protein	20	26	52	23	32	1.625	0.532185	0.769135	0.268858	1.05103e-08	0.498601	0.840379	0.041845	1	1	0.0464451	1.05103e-08
2270373			2270275	-	-	predicted RNA	antisense: mepS	277	584	134	325	157	0.853503	1	0.724702	4.89715e-05	0.208391	0.444262	1.07231e-08	0.168633	1	1	0.0360835	1.07231e-08
456414			455021	-	-	predicted RNA	antisense: tig	647	846	123	329	167	0.736527	1	0.226831	1.15417e-08	0.162767	0.816564	0.0268091	0.845995	1	1	0.542741	1.15417e-08
	4283075	4281783		-	yjcF	b4066	pentapeptide repeats protein	8	17	34	10	11	3.09091	0.000324483	0.83199	0.620483	1.29959e-08	0.499604	0.156375	0.807981	1	1	0.0475361	1.29959e-08
3444539	3444539	3444105	3444098	-	rplO	b3301	50S ribosomal subunit protein L15	2139	2940	414	1091	631	0.656101	1	0.244227	1.34049e-08	0.192212	0.819009	0.110724	0.828895	1	1	0.465008	1.34049e-08
122053	122092	122856	122856	+	pdhR	b0113	pyruvate dehydrogenase complex repressor; autorepressor	106	190	60	54	58	1.03448	1	0.720015	0.00118889	0.478674	0.73238	1.36671e-05	0.828895	1	1	1.55878e-08	1.55878e-08
	3734	5020	5020	+	thrC	b0004	L-threonine synthase	465	589	105	176	161	0.652174	1	0.216499	1.78636e-08	0.284658	0.473385	0.150293	0.835421	1	1	0.0508984	1.78636e-08
2269887	2269979	2270545	2270545	+	mepS	b2175	murein DD-endopeptidase, space-maker hydrolase, mutational suppressor of prc thermosensitivity, outer membrane lipoprotein	301	559	132	355	135	0.977778	1	0.599045	2.59617e-07	0.010807	0.515598	1.80549e-08	0.0123492	1	1	0.444054	1.80549e-08
638792	638945	639508	639508	+	ahpC	b0605	alkyl hydroperoxide reductase, C22 subunit	1261	1460	251	1028	407	0.616708	1	0.167199	1.8606e-08	0.0015654	0.801388	0.221691	0.826702	1	1	0.711462	1.8606e-08
3377549	3377420	3376782	3376777	-	sspA	b3229	stringent starvation protein A, phage P1 late gene activator, RNAP-associated acid-resistance protein, inactive glutathione S-transferase homolog	265	407	90	231	118	0.762712	1	0.33731	2.09875e-08	0.0165335	0.512293	1.33521e-05	0.20263	1	1	0.296241	2.09875e-08
759114			758819	-	-	predicted RNA	antisense: sucA	464	730	158	294	224	0.705357	1	0.419028	2.13351e-08	0.235882	0.604979	1.83766e-05	0.737828	1	1	0.00772684	2.13351e-08
4177743	4177743	4178288	4178412	+	nusG	b3982	transcription termination factor	308	470	104	245	153	0.679739	1	0.33731	2.1692e-08	0.0381557	0.716337	0.00033758	0.484572	1	1	0.197608	2.1692e-08
848936	848911	848408	848333	-	dps	b0812	Fe-binding and storage protein; stress-inducible DNA-binding protetin	344	355	181	855	432	0.418981	0.23807	0.919485	0.117596	2.33354e-08	0.410692	0.976307	0.958758	1	1	0.27563	2.33354e-08
761983			761460	-	-	predicted RNA	antisense: sucB sucA	440	628	140	256	209	0.669856	1	0.246424	2.45459e-08	0.158068	0.730317	0.00580133	0.831908	1	1	0.0488866	2.45459e-08
2100301			2100350	+	-	predicted RNA	antisense: gnd	435	553	113	235	159	0.710692	1	0.227528	2.93798e-08	0.329572	0.381142	1.29852e-06	0.755359	1	1	0.000155643	2.93798e-08
554563	554437	553943	553943	-	ppiB	b0525	peptidyl-prolyl cis-trans isomerase B (rotamase B)	499	607	136	355	175	0.777143	1	0.18066	2.98544e-08	0.013028	0.384746	2.43581e-05	0.16783	1	1	0.388011	2.98544e-08
	710646	710200	710197	-	fur	b0683	ferric iron uptake regulon transcriptional repressor; autorepressor	292	499	109	301	157	0.694268	1	0.515262	3.01833e-08	0.0108464	0.820332	6.10143e-05	0.214845	1	1	0.294124	3.01833e-08
4376159			4375752	-	-	predicted RNA	antisense: efp	481	640	144	317	192	0.75	1	0.231139	3.14603e-08	0.0607881	0.435127	3.71897e-05	0.453873	1	1	0.147963	3.14603e-08
4304430	4304403	4304128	4304110	-	ytcA	b4622	putative inner membrane DUF1656 family protein; efflux pump associated	21	27	55	18	26	2.11538	0.14624	0.450846	0.311216	3.24682e-08	0.500697	0.396933	0.355117	1	1	0.0465966	3.24682e-08
848380			848879	+	-	predicted RNA	antisense: dps	326	351	186	874	430	0.432558	0.28753	0.855613	0.140239	3.27592e-08	0.390522	0.939973	0.993569	1	0.957182	0.243564	3.27592e-08
8225	8238	9191	9191	+	talB	b0008	transaldolase B	585	625	126	322	187	0.673797	1	0.120782	3.34838e-08	0.0446617	0.790772	0.11282	0.787053	1	1	0.668257	3.34838e-08
2430782	2430763	2430275	2430275	-	cvpA	b2313	colicin V production membrane protein	252	425	111	221	110	1.00909	1	0.762223	1.13219e-05	0.13821	0.497542	3.70051e-08	0.168633	1	1	0.12943	3.70051e-08
3049572	3049549	3049160	3049156	-	gcvH	b2904	glycine cleavage complex lipoylprotein	89	111	50	37	44	1.13636	1	0.634512	0.154106	0.0867469	0.514649	0.00185788	0.625403	1	1	4.18275e-08	4.18275e-08
2058102			2058027	-	asnW	b1984	Asn tRNA	36	56	80	38	38	2.10526	0.0956003	0.480137	0.568631	4.4391e-08	0.514649	0.150293	0.515098	1	1	0.00064645	4.4391e-08
922336			922636	+	-	predicted RNA	antisense: cspD	176	179	226	1030	305	0.740984	1	0.293033	0.612987	5.28436e-08	0.263641	0.89213	0.00059747	1	0.00100049	0.000130983	5.28436e-08
3441708	3441675	3441055	3441030	-	rpsD	b3296	30S ribosomal subunit protein S4	2467	3584	421	1370	686	0.613703	1	0.287373	5.49343e-08	0.199963	0.453309	0.133451	0.831908	1	1	0.991783	5.49343e-08
	293918	293220		-	yagL	b0278	CP4-6 prophage; DNA-binding protein	12	20	44	14	16	2.75	0.00316357	0.409371	0.355476	5.80014e-08	0.498601	0.282875	0.722759	1	1	0.108674	5.80014e-08
29648	29651	30799	30816	+	carA	b0032	carbamoyl phosphate synthetase small subunit, glutamine amidotransferase	437	609	115	142	118	0.974576	1	0.261003	6.08909e-08	0.730144	0.380234	1.58611e-07	0.837706	1	1	4.45548e-05	6.08909e-08
2100950			2101105	+	-	predicted RNA	antisense: gnd	488	644	125	279	194	0.64433	1	0.30048	6.08909e-08	0.244158	0.435127	5.96467e-06	0.713675	1	1	0.00225089	6.08909e-08
3405907	3405917	3407266	3407269	+	accC	b3256	acetyl-CoA carboxylase, biotin carboxylase subunit	282	348	76	170	100	0.76	1	0.207768	6.19263e-08	0.0632366	0.432899	0.00392438	0.526572	1	1	0.377228	6.19263e-08
4374527	4375699	4376265	4376265	+	efp	b4147	polyproline-specific translation elongation factor EF-P	427	601	137	299	177	0.774011	1	0.246424	6.22156e-08	0.0503114	0.472005	0.000236088	0.427756	1	1	0.269959	6.22156e-08
3922468	3922440	3922060	3922052	-	atpI	b3739	ATP synthase, membrane-bound accessory factor	260	492	116	222	129	0.899225	1	0.827545	6.93738e-07	0.217547	0.590414	6.70611e-08	0.436834	1	1	0.0249245	6.70611e-08
710735	710725	710639		-	uof	b4637	ryhB-regulated fur leader peptide	394	674	131	376	187	0.700535	1	0.435084	3.95941e-07	0.0801852	0.494862	7.0589e-08	0.224131	1	1	0.0371277	7.0589e-08
755330			754971	-	-	predicted RNA	antisense: sdhC	396	959	220	392	276	0.797101	1	0.864146	8.0133e-08	0.164941	0.500554	0.000125812	0.638749	1	1	0.0626498	8.0133e-08
2087121	2087114	2087052		-	yoeI	b4678	uncharacterized protein	126	145	74	55	51	1.45098	0.829879	0.694197	0.131384	0.0727307	0.390522	6.29325e-05	0.84376	1	0.954752	8.76636e-08	8.76636e-08
710536			710752	+	-	predicted RNA	antisense: fur uof	361	597	122	332	173	0.705202	1	0.508868	9.32157e-08	0.0444278	0.515598	1.5606e-06	0.273307	1	1	0.0904433	9.32157e-08
1492346	1492129	1491962		-	mokB	b1420	regulatory peptide	114	251	79	250	73	1.08219	1	0.638235	0.0128139	0.0292161	0.708498	1.12307e-07	2.77288e-06	1	1	0.388603	1.12307e-07
4100791	4100810	4101430	4101584	+	sodA	b3908	superoxide dismutase, Mn	2011	2174	309	1372	516	0.598837	1	0.152723	1.1294e-07	0.011348	0.837541	0.249633	0.866493	1	1	0.725094	1.1294e-07
1492119			1492174	+	sokB	b4429	-	92	177	78	146	50	1.56	0.754528	0.564347	0.0434097	0.37973	0.529421	1.27937e-07	0.00173016	1	1	0.176983	1.27937e-07
711477	711465	710935	710757	-	fldA	b0684	flavodoxin 1	287	398	90	217	125	0.72	1	0.324294	1.36899e-07	0.0428705	0.499604	3.52711e-05	0.36673	1	1	0.17751	1.36899e-07
3722076			3722105	+	sokA	b4614	-	27	35	50	23	23	2.17391	0.000468698	0.458015	0.874683	1.43011e-07	0.472005	0.00434851	0.818711	1	1	0.000291213	1.43011e-07
4246432	4246419	4245229	4245229	-	malE	b4034	maltose transporter subunit	111	163	91	427	89	1.02247	1	0.441143	0.197712	1.72533e-07	0.490958	0.197644	1.71696e-07	1	0.134226	0.245908	1.71696e-07
2943184	2943145	2942918	2942918	-	ygdI	b2809	DUF903 family verified lipoprotein	56	63	86	420	108	0.796296	1	0.515262	0.891933	2.05522e-06	0.489278	0.986996	1.85595e-07	1	1	4.66039e-06	1.85595e-07
3324959	3327790	3328083	3328099	+	yhbY	b3180	RNA binding protein associated with pre-50S ribosomal subunits	249	514	111	307	150	0.74	1	0.918411	1.98304e-07	0.0247972	0.981855	2.95303e-06	0.17091	1	1	0.168713	1.98304e-07
3318212	3318006	3317554	3317527	-	rimP	b3170	ribosome maturation factor for 30S subunits	195	449	103	202	131	0.78626	1	0.876907	2.02504e-07	0.179084	0.914221	3.52341e-06	0.542784	1	1	0.0301171	2.02504e-07
3266266	3267380	3267598	3267762	+	tdcR	b3119	L-threonine dehydratase operon activator protein	22	26	44	16	18	2.44444	0.038163	0.482845	0.384693	2.05067e-07	0.649928	0.185215	0.617326	1	1	0.0110972	2.05067e-07
3377830			3378794	+	-	predicted RNA	antisense: rpsI rplM	2078	3073	317	958	468	0.67735	1	0.491581	2.13257e-07	0.666322	0.847738	0.029961	0.833979	1	1	0.423415	2.13257e-07
3986596			3986449	-	-	predicted RNA	antisense: glmZ	599	1001	284	1299	386	0.735751	1	0.918814	0.000139379	2.15949e-07	0.99799	0.00183212	3.7645e-05	1	1	0.678693	2.15949e-07
	312514	312374	311726	-	ykgO	b4506	RpmJ-like protein	30	36	81	29	35	2.31429	0.0860588	0.748654	0.213011	2.26981e-07	0.511465	0.50384	0.538759	1	1	0.133608	2.26981e-07
201024			200300	-	-	predicted RNA	antisense: lpxD skp bamA	492	671	150	452	262	0.572519	0.800457	0.256029	2.30087e-07	0.00615925	0.496939	0.344433	0.912664	1	1	0.852832	2.30087e-07
1262025	1261875	1260928	1260905	-	prs	b1207	phosphoribosylpyrophosphate synthase	374	459	105	295	146	0.719178	1	0.222656	2.32394e-07	0.0102585	0.454211	0.0182715	0.45449	1	1	0.8606	2.32394e-07
1799756	1799749	1799393	1799393	-	rplT	b1716	50S ribosomal subunit protein L20	2124	3156	490	1760	799	0.613267	1	0.307646	2.34928e-07	0.0408859	0.475323	0.250459	0.831908	1	1	0.728603	2.34928e-07
4177129	4177358	4177741	4177742	+	secE	b3981	preprotein translocase membrane subunit	329	556	128	279	169	0.757396	1	0.574118	2.35726e-07	0.0874877	0.703509	1.45496e-05	0.448518	1	1	0.106602	2.35726e-07
1915335			1915412	+	-	predicted RNA	antisense: proQ	323	566	112	310	169	0.662722	1	0.553088	1.31082e-06	0.115486	0.432899	2.46933e-07	0.326731	1	1	0.029083	2.46933e-07
450374			451629	+	-	predicted RNA	antisense: cyoB cyoA	603	827	132	287	194	0.680412	1	0.274205	2.47945e-07	0.263147	0.802151	0.119055	0.826824	1	1	0.307997	2.47945e-07
189848	189874	190599	190603	+	rpsB	b0169	30S ribosomal subunit protein S2	1876	2712	343	1095	545	0.629358	1	0.300539	2.48724e-07	0.192212	0.455843	0.150293	0.831908	1	1	0.965892	2.48724e-07
	2015868	2016554		+	fliH	b1940	negative regulator of FliI ATPase activity	178	430	102	124	114	0.894737	1	0.756606	2.65865e-07	0.835197	0.805953	9.80016e-07	0.946687	1	1	5.88555e-06	2.65865e-07
4313344	4313350	4313799	4313799	+	rpiB	b4090	ribose 5-phosphate isomerase B/allose 6-phosphate isomerase	24	33	79	26	29	2.72414	0.00213687	0.425982	0.30496	2.78784e-07	0.500554	0.319808	0.780228	1	1	0.19226	2.78784e-07
	2041375	2042025		+	zinT	b1973	zinc and cadmium binding protein, periplasmic	13	20	45	15	22	2.04545	0.130621	0.416209	0.34346	2.91147e-07	0.492081	0.432592	0.438878	1	1	0.135037	2.91147e-07
1571503			1571584	+	-	predicted RNA	antisense: gadB	156	84	300	327	505	0.594059	1	0.4861	0.0166263	0.646047	0.453309	3.7094e-07	0.409377	1	1	0.0211698	3.7094e-07
4101418			4100775	-	-	predicted RNA	antisense: sodA	1986	2152	311	1397	517	0.601547	1	0.175679	3.76582e-07	0.0119251	0.836606	0.266998	0.870356	1	1	0.722336	3.76582e-07
1462			1408	-	-	predicted RNA	antisense: thrA	518	585	136	203	217	0.626728	1	0.268683	0.000133688	0.949456	0.383448	0.000193215	0.809722	1	0.984704	4.03893e-07	4.03893e-07
1903874			1903855	-	-	predicted RNA	antisense: manY	379	582	156	422	172	0.906977	1	0.530552	1.64693e-05	0.0373424	0.409059	4.07209e-07	0.0313375	1	1	0.100012	4.07209e-07
284			165	-	-	predicted RNA	antisense: thrL	474	923	194	600	303	0.640264	1	0.804912	4.09047e-07	0.0144789	0.907771	5.23754e-05	0.226961	1	1	0.189322	4.09047e-07
	4321696	4321244		-	phnG	b4101	ribophosphonate triphosphate synthase subunit	7	12	37	13	14	2.64286	0.011337	0.843549	0.0456516	5.06357e-07	0.498601	0.741343	0.734326	1	1	0.406642	5.06357e-07
92603			92548	-	-	predicted RNA	antisense: ftsI	177	501	122	344	141	0.865248	1	0.623599	0.000338334	0.113075	0.673847	5.12021e-07	0.05138	1	1	0.115792	5.12021e-07
1757375	1757421	1757657	1757862	+	lpp	b1677	murein lipoprotein	4037	9154	1126	5176	1764	0.638322	1	0.804055	6.26841e-07	0.045069	0.476682	0.133295	0.897614	0.480622	1	0.724858	6.26841e-07
	3623399	3623782	3624035	+	yhhH	b3483	putative immunity protein for putative polymorphic toxin RhsB	12	34	52	18	15	3.46667	5.28067e-05	0.84085	0.798472	6.29569e-07	0.500697	0.014782	0.995645	1	1	0.00773059	6.29569e-07
527581	527581	527949	528525	+	ybbC	b0498	putative immunity protein	15	21	66	23	24	2.75	0.00378859	0.383573	0.0821242	6.37166e-07	0.497212	0.51432	0.807981	1	1	0.366842	6.37166e-07
922668	922590	922366	922348	-	cspD	b0880	inhibitor of DNA replication, cold shock protein homolog	170	187	242	1048	322	0.751553	1	0.310791	0.571493	7.0966e-07	0.264814	0.980561	0.000270268	1	0.00587303	0.000504196	7.0966e-07
4392583			4392658	+	glyY	b4165	Gly tRNA	146	232	65	104	64	1.01562	1	0.812836	0.000143124	0.726098	0.421294	7.23691e-07	0.667883	1	1	0.000299855	7.23691e-07
3982735			3982811	+	proM	b3799	Pro tRNA	91	219	74	83	60	1.23333	1	0.582624	0.00972621	0.602308	0.866053	7.32816e-07	0.836638	1	1	4.95843e-06	7.32816e-07
3919869	3919857	3918316	3918266	-	atpA	b3734	F1 sector of membrane-bound ATP synthase, alpha subunit	992	1322	167	624	265	0.630189	1	0.278947	7.34042e-07	0.12021	0.834246	0.154428	0.837406	1	1	0.801511	7.34042e-07
2990980	2991268	2991759	2991842	+	ygeG	b2851	SycD-like chaperone family TPR-repeat-containing protein	16	29	51	18	22	2.31818	0.0384596	0.426611	0.655028	7.54527e-07	0.498601	0.230175	0.617326	1	1	0.028412	7.54527e-07
2620877	2620872	2620246	2620243	-	upp	b2498	uracil phosphoribosyltransferase	258	268	67	81	81	0.82716	1	0.205727	5.99068e-06	0.996491	0.34329	8.7138e-06	0.929986	1	0.520844	7.68289e-07	7.68289e-07
578895	578893	578600	578168	-	borD	b0557	DLP12 prophage; putative lipoprotein	179	421	128	163	120	1.06667	1	0.495196	0.000850595	0.944391	0.855572	8.43653e-07	0.755359	1	1	0.000489577	8.43653e-07
1050585			1050458	-	-	predicted RNA	antisense: insB1	297	634	149	260	181	0.823204	1	0.733569	3.37365e-05	0.62522	0.859935	8.45887e-07	0.72194	1	1	0.000510229	8.45887e-07
2462875	2463012	2464070	2464297	+	yfdF	b2345	uncharacterized protein	14	21	46	16	19	2.42105	0.0521897	0.792551	0.537758	8.59822e-07	0.500433	0.376794	0.616759	1	1	0.135037	8.59822e-07
1150670	1150670	1151404	1151530	+	fabG	b1093	3-oxoacyl-[acyl-carrier-protein] reductase	367	579	137	360	193	0.709845	1	0.314253	8.73667e-07	0.0190798	0.808969	0.0346961	0.515098	1	1	0.725094	8.73667e-07
1915534	1915534	1914836	1914831	-	proQ	b1831	RNA chaperone, putative ProP translation regulator	349	536	129	298	187	0.68984	1	0.31139	8.79839e-07	0.0430018	0.653492	0.02391	0.526572	1	1	0.406987	8.79839e-07
3853257			3853118	-	istR	b4616	-	25	24	45	21	23	1.95652	0.177298	0.714423	0.30397	8.8709e-07	0.627283	0.444306	0.485385	1	1	0.0625597	8.8709e-07
1622620	1622646	1622741	1622750	+	yneM	b4599	inner membrane-associated protein	98	404	133	290	123	1.0813	1	0.526294	0.0225	0.336417	0.499604	9.37606e-07	0.0316054	1	1	0.17566	9.37606e-07
2989904	2989899	2989819	2989476	-	yqeL	b4683	uncharacterized protein	14	24	47	25	16	2.9375	0.00461378	0.421695	0.217279	9.67959e-07	0.502971	0.283678	0.995528	1	1	0.170691	9.67959e-07
200361			200420	+	-	predicted RNA	-	391	658	129	399	213	0.605634	1	0.530552	1.04225e-06	0.0512792	0.443227	4.21375e-06	0.292908	1	1	0.0640895	1.04225e-06
729025	728821	728732		-	kdpF	b4513	potassium ion accessory transporter subunit	11	17	41	22	21	1.95238	0.430513	0.401181	0.0770542	1.05285e-06	0.485854	0.942128	0.4257	1	1	0.394565	1.05285e-06
1456186			1456161	-	-	predicted RNA	antisense: paaD	303	71	277	284	314	0.882166	1	0.582624	2.70431e-05	0.340017	0.504157	1.05853e-06	0.719528	1	1	0.000100076	1.05853e-06
2716450	2716449	2716066	2716066	-	grcA	b2579	autonomous glycyl radical cofactor	185	132	52	51	40	1.3	0.913974	0.385365	0.0725167	0.392379	0.004202	1.06936e-06	0.826824	1	0.0595158	4.90347e-05	1.06936e-06
2561614	2561625	2561993	2562110	+	yffN	b2445	CPZ-55 prophage; uncharacterized protein	26	26	63	22	33	1.90909	0.208227	0.460694	0.234492	1.08696e-06	0.498601	0.660603	0.383552	1	1	0.211033	1.08696e-06
448020			448106	+	-	predicted RNA	antisense: cyoD cyoC	393	583	117	216	178	0.657303	1	0.326405	1.21775e-06	0.643348	0.460037	1.48139e-06	0.872792	1	1	1.1925e-05	1.21775e-06
710272			710432	+	-	predicted RNA	antisense: fur	309	541	113	303	159	0.710692	1	0.623277	1.30145e-06	0.0879564	0.655199	2.9304e-06	0.347469	1	1	0.0562332	1.30145e-06
4269162	4269012	4268809	4268737	-	yjbS	b4621	uncharacterized protein	22	20	51	20	21	2.42857	0.026099	0.469851	0.107421	1.33933e-06	0.527243	0.570609	0.719711	1	1	0.317444	1.33933e-06
1051971	1051175	1050963	1050963	-	cspH	b0989	stress protein, member of the CspA-family	36	164	71	59	51	1.39216	0.779341	0.480669	0.138999	0.163041	0.498601	3.68264e-06	0.975309	1	1	1.39269e-06	1.39269e-06
3950310	3950322	3950420	3950420	+	ilvL	b3766	ilvG operon leader peptide	435	849	229	860	245	0.934694	1	0.669347	0.000435015	0.00101314	0.73129	1.41549e-06	1.03265e-05	1	1	0.52593	1.41549e-06
3337			3090	-	-	predicted RNA	antisense: thrB	510	668	159	232	240	0.6625	1	0.366051	1.4967e-06	0.688907	0.544241	0.000528866	0.900537	1	1	8.23557e-05	1.4967e-06
4611295	4611396	4612001	4612029	+	osmY	b4376	periplasmic protein	127	102	95	399	155	0.612903	1	0.462681	0.429445	1.51576e-06	0.409059	0.968322	0.041845	1	1	0.0297437	1.51576e-06
4111099			4111223	+	-	predicted RNA	antisense: tpiA	406	555	116	313	164	0.707317	1	0.368354	2.50036e-06	0.10773	0.434643	1.52955e-06	0.344053	1	1	0.0417096	1.52955e-06
4151502			4151621	+	-	predicted RNA	antisense: ppc	472	647	134	302	246	0.544715	1	0.383573	1.60993e-06	0.271291	0.724486	0.00122076	0.865878	1	1	0.00483343	1.60993e-06
639477			638824	-	-	predicted RNA	antisense: ahpC	1137	1387	241	934	372	0.647849	1	0.246424	1.61584e-06	0.0123146	0.801388	0.216146	0.876203	1	1	0.716224	1.61584e-06
4370686	4370688	4370981	4371024	+	groS	b4142	Cpn10 chaperonin GroES, small subunit of GroESL	479	340	83	193	98	0.846939	1	0.022174	3.78476e-05	0.159259	0.00431313	1.72325e-06	0.281969	1	1	0.0699487	1.72325e-06
754971	755177	755566		+	sdhC	b0721	succinate dehydrogenase, membrane subunit, binds cytochrome b556	305	634	158	244	193	0.818653	1	0.9347	1.75713e-06	0.433562	0.851183	4.0189e-05	0.787053	1	1	0.00583046	1.75713e-06
	1492071	1491922	1491639	-	hokB	b4428	toxic polypeptide, small	127	261	81	265	82	0.987805	1	0.647456	0.0119703	0.0232228	0.730591	1.81366e-06	2.10912e-05	1	1	0.390553	1.81366e-06
4058090			4058043	-	-	predicted RNA	-	275	664	172	387	198	0.868687	1	0.63897	0.00106164	0.346944	0.870243	1.98278e-06	0.337048	1	1	0.0341703	1.98278e-06
3885076	3885076	3886722	3886722	+	yidC	b3705	membrane protein insertase	259	409	83	133	84	0.988095	1	0.344579	2.02993e-06	0.303174	0.410649	2.57434e-06	0.562777	1	1	0.0841368	2.02993e-06
148	190	255	265	+	thrL	b0001	thr operon leader peptide	512	1024	213	713	343	0.620991	1	0.751578	2.2222e-06	0.0134832	0.935406	8.26647e-05	0.192596	1	1	0.183222	2.2222e-06
3952085	3952201	3952464	3952464	+	ilvM	b3769	acetolactate synthase 2 small subunit	35	71	37	26	29	1.27586	0.96348	0.565473	0.268862	0.0684123	0.64162	0.00374177	0.719254	1	1	2.35226e-06	2.35226e-06
79146			79173	+	-	predicted RNA	antisense: leuD	374	525	134	475	321	0.417445	0.286879	0.321186	2.35399e-06	0.000373446	0.601435	0.125934	0.738355	1	1	0.254561	2.35399e-06
1299488			1299510	+	-	predicted RNA	-	268	680	174	598	282	0.617021	1	0.650017	2.39386e-06	0.000709211	0.502971	0.00406836	0.241071	1	1	0.239213	2.39386e-06
1923284			1923164	-	sdsR	b4433	-	165	302	99	265	94	1.05319	1	0.654355	0.0219429	0.123993	0.510489	2.40902e-06	0.00153447	1	1	0.307582	2.40902e-06
3937242			3937114	-	-	predicted RNA	antisense: rbsB	174	455	124	476	137	0.905109	1	0.647819	0.00120125	0.00162381	0.827862	2.56351e-06	7.99074e-06	1	1	0.424432	2.56351e-06
449795			450005	+	-	predicted RNA	antisense: cyoB	443	576	130	212	176	0.738636	1	0.381491	2.96992e-06	0.645664	0.41711	9.18494e-06	0.864728	1	1	0.000108822	2.96992e-06
1923066			1923314	+	ryeA	b4432	-	159	300	93	253	90	1.03333	1	0.61331	0.00438221	0.0538701	0.70234	2.98345e-06	0.00270075	1	1	0.334765	2.98345e-06
200421	200482	200967	200967	+	skp	b0178	periplasmic chaperone	546	687	173	476	279	0.620072	0.825198	0.245291	3.05869e-06	0.0096021	0.679226	0.103448	0.524749	1	1	0.706471	3.05869e-06
192739	192872	193429	193429	+	frr	b0172	ribosome recycling factor	387	410	104	275	160	0.65	1	0.179795	3.43937e-06	0.0118747	0.458446	0.00945779	0.395026	1	1	0.400387	3.43937e-06
3311225			3311398	+	psrO	b4449	-	66	138	32	77	43	0.744186	1	0.834134	3.52909e-06	0.165244	0.999167	1.10484e-05	0.515098	1	1	0.0136685	3.52909e-06
1351111	1351039	1350251	1350251	-	fabI	b1288	enoyl-[acyl-carrier-protein] reductase, NADH-dependent	495	610	146	311	172	0.848837	1	0.250893	3.59756e-06	0.0918001	0.421515	0.00276485	0.504212	1	1	0.412999	3.59756e-06
2351015	2351011	2349935	2349935	-	glpQ	b2239	periplasmic glycerophosphodiester phosphodiesterase	100	184	92	263	69	1.33333	1	0.374087	0.120782	0.00836036	0.701617	0.0025288	3.6505e-06	1	1	0.561212	3.6505e-06
3986432			3986638	+	glmZ	b4456	-	399	718	216	901	278	0.776978	1	0.828767	0.00040584	4.47287e-06	0.842142	0.00195263	0.000118097	1	1	0.753997	4.47287e-06
2757509	2758644	2758856	2758984	+	alpA	b2624	CP4-57 prophage; DNA-binding transcriptional activator	24	32	47	19	43	1.09302	1	0.482845	0.568503	4.58164e-06	0.490958	0.840264	0.00049089	1	1	0.00729123	4.58164e-06
1068013	1068081	1068254	1068367	+	ymdF	b4518	KGG family protein	27	32	166	177	157	1.05732	1	0.871066	7.8214e-06	0.640762	0.41711	5.85638e-05	0.974421	1	1	4.80882e-06	4.80882e-06
189538	189506	188712	188712	-	map	b0168	methionine aminopeptidase	185	279	71	152	102	0.696078	1	0.507276	4.81533e-06	0.0841773	0.930482	0.00214333	0.574401	1	1	0.187969	4.81533e-06
236931			237007	+	aspV	b0216	Asp tRNA	30	65	51	37	30	1.7	0.77648	0.490745	0.33103	0.00417399	0.511465	0.0261305	0.691482	1	1	4.95843e-06	4.95843e-06
4218388			4215415	-	-	predicted RNA	antisense: aceA aceB	763	469	197	2683	1460	0.134932	0.392438	0.395262	0.767847	4.95866e-06	0.502971	0.968896	0.723487	1	0.490608	0.0898406	4.95866e-06
3658054			3657986	-	arrS	b4704	-	18	18	47	27	28	1.67857	0.82418	0.456426	0.0865399	5.34502e-06	0.499604	0.723513	0.211631	1	1	0.461745	5.34502e-06
3648294			3648377	+	agrB	b4713	-	32	43	68	35	43	1.5814	0.593055	0.482845	0.543745	5.43695e-06	0.499604	0.49617	0.20316	1	1	0.0180033	5.43695e-06
2976189			2976102	-	omrA	b4444	-	32	33	64	33	40	1.6	0.511744	0.483512	0.306941	5.50582e-06	0.500554	0.757318	0.275417	1	1	0.12404	5.50582e-06
3766317	3766337	3767179	3768176	+	yibA	b3594	HEAT-domain lethality reduction protein; putative immunity protein for putative polymorphic toxin RhsA	14	25	44	17	16	2.75	0.00210519	0.43932	0.815131	5.57456e-06	0.508093	0.127653	0.948862	1	1	0.0923923	5.57456e-06
	4003193	4002813		-	yigG	b3818	PRK11371 family inner membrane protein	12	16	29	11	12	2.41667	0.0860588	0.464423	0.352486	5.816e-06	0.508968	0.278087	0.656515	1	1	0.0520695	5.816e-06
2983			2661	-	-	predicted RNA	antisense: thrA thrB	492	612	156	235	224	0.696429	1	0.318505	5.97038e-06	0.543467	0.548227	0.00147661	0.983054	1	1	0.00231935	5.97038e-06
202560	202560	203348		+	lpxA	b0181	UDP-N-acetylglucosamine acetyltransferase	224	332	86	177	109	0.788991	1	0.434211	6.21643e-06	0.0857758	0.65214	0.000478385	0.46764	1	1	0.232773	6.21643e-06
1555812			1556030	+	-	predicted RNA	antisense: sra	224	226	392	1470	726	0.539945	0.609681	0.187284	0.789865	5.99068e-05	6.79095e-05	0.133295	0.535167	1	0.000233195	6.65712e-06	6.65712e-06
290322	290305	289301	289301	-	argF	b0273	ornithine carbamoyltransferase 2, chain F; CP4-6 prophage	153	175	141	78	52	2.71154	0.011337	0.43932	0.484375	0.0661247	0.390522	6.66959e-06	0.601242	1	1	0.0187054	6.66959e-06
1527153	1529922	1530404	1531815	+	ydcD	b1457	uncharacterized protein	7	17	39	15	11	3.54545	3.50774e-05	0.441807	0.25171	7.30737e-06	0.500554	0.187819	0.875631	1	1	0.215502	7.30737e-06
289234	289162	288404	288404	-	yagI	b0272	CP4-6 prophage; putative DNA-binding transcriptional regulator	39	67	48	27	21	2.28571	0.0588006	0.434325	0.342211	0.0296836	0.499604	8.38089e-06	0.826384	1	1	0.000256631	8.38089e-06
2211113	2211225	2211686	2214863	+	yehR	b2123	lipoprotein, DUF1307 family	22	26	52	20	29	1.7931	0.241686	0.459514	0.383486	8.43087e-06	0.498601	0.422621	0.441025	1	1	0.138595	8.43087e-06
2389912	2388426	2387710	2387617	-	yfbN	b2273	uncharacterized protein	21	26	59	22	32	1.84375	0.404654	0.77807	0.48649	8.61963e-06	0.49957	0.511946	0.400558	1	1	0.197608	8.61963e-06
1556005	1555963	1555826	1555824	-	sra	b1480	stationary-phase-induced ribosome-associated protein	262	250	437	1682	847	0.515939	0.541503	0.255509	0.877525	2.1128e-05	0.000248933	0.110855	0.365917	1	0.000928974	8.77821e-06	8.77821e-06
185947	185947	185123	185121	-	dapD	b0166	2,3,4,5-tetrahydropyridine-2-carboxylate N-succinyltransferase	440	520	130	381	292	0.445205	0.404654	0.244743	9.40636e-06	0.00813579	0.537544	0.759553	0.826824	1	1	0.783601	9.40636e-06
491373	491412	491963	491963	+	apt	b0469	adenine phosphoribosyltransferase	178	264	84	107	80	1.05	1	0.920796	0.00116237	0.874739	0.498601	1.01599e-05	0.767619	1	1	0.00225089	1.01599e-05
1641846	1641855	1642067	1642270	+	cspF	b1558	Qin prophage; cold shock protein	33	261	94	118	82	1.14634	1	0.437027	0.0353719	0.829676	0.465415	1.01676e-05	0.713675	1	1	0.00264886	1.01676e-05
3086579	3086706	3087860	3087950	+	metK	b2942	S-adenosylmethionine synthetase	452	329	85	220	97	0.876289	1	0.0126767	1.02806e-05	0.0196002	0.119652	0.00111821	0.226961	1	1	0.771804	1.02806e-05
1151900	1151939	1153180	1153180	+	fabF	b1095	3-oxoacyl-[acyl-carrier-protein] synthase II	245	365	91	189	107	0.850467	1	0.326405	1.05016e-05	0.0982571	0.554569	0.00406836	0.508996	1	1	0.409843	1.05016e-05
3784153	3784128	3783661		-	secB	b3609	protein export chaperone	290	329	83	227	104	0.798077	1	0.29508	1.06783e-05	0.0182322	0.397177	3.33671e-05	0.0876959	1	1	0.29554	1.06783e-05
1287440			1287465	+	-	predicted RNA	-	373	554	154	219	182	0.846154	1	0.484378	2.79188e-05	0.857611	0.502971	0.000112031	0.99372	1	1	1.12362e-05	1.12362e-05
494050	494076	494405		+	ybaB	b0471	DNA-binding protein, putative nucleoid-associated protein	239	311	91	166	96	0.947917	1	0.654355	0.00105544	0.412189	0.432899	1.1387e-05	0.47173	1	1	0.0449732	1.1387e-05
135593	135582	134788	134788	-	speD	b0120	S-adenosylmethionine decarboxylase	218	270	73	109	81	0.901235	1	0.325044	2.50892e-05	0.506602	0.405298	1.16386e-05	0.716212	1	1	0.00861481	1.16386e-05
1663			1594	-	-	predicted RNA	antisense: thrA	552	582	134	225	239	0.560669	1	0.232137	8.38285e-05	0.852156	0.435127	0.0025102	0.788137	1	1	1.19506e-05	1.19506e-05
932633			932422	-	-	predicted RNA	antisense: lrp	541	644	159	510	321	0.495327	0.845378	0.353738	1.22628e-05	0.00391008	0.96665	0.0402672	0.50382	1	1	0.396709	1.22628e-05
1147621	1147621	1148691	1148709	+	plsX	b1090	putative phosphate acyltransferase	115	253	80	122	73	1.09589	1	0.474309	0.000884496	0.354443	0.831255	1.28994e-05	0.429979	1	1	0.137205	1.28994e-05
2013019	2013014	2012700	2012412	-	fliE	b1937	flagellar basal-body component	130	191	68	69	66	1.0303	1	0.650323	0.0271685	0.489579	0.533809	0.000146262	0.929335	1	1	1.30876e-05	1.30876e-05
3581676	3581863	3583041	3583482	+	yhhZ	b3442	putative Hcp1 family polymorphic toxin protein; putative colicin-like DNase/tRNase activity	16	24	45	16	16	2.8125	0.00572143	0.74242	0.796717	1.35771e-05	0.513239	0.186855	0.837706	1	1	0.0923185	1.35771e-05
1801638			1801660	+	-	predicted RNA	antisense: thrS	407	563	150	320	206	0.728155	1	0.33912	1.35996e-05	0.208634	0.566971	0.000934272	0.719711	1	1	0.0150224	1.35996e-05
125695	125695	127587	127804	+	aceF	b0115	pyruvate dehydrogenase, dihydrolipoyltransacetylase component E2	308	371	75	149	87	0.862069	1	0.268683	1.40101e-05	0.234701	0.494862	0.00456437	0.638748	1	1	0.334887	1.40101e-05
3308924	3308924	3308040	3308024	-	nlpI	b3163	lipoprotein involved in osmotic sensitivity and filamentation	201	807	163	473	230	0.708696	1	0.516016	1.40101e-05	0.0621917	0.443227	0.159932	0.85286	0.0129679	1	0.789968	1.40101e-05
2804792	2804815	2806017		+	proV	b2677	glycine betaine transporter subunit	181	258	68	97	76	0.894737	1	0.343288	1.49846e-05	0.506587	0.473385	9.28302e-05	0.785877	1	1	0.0114597	1.49846e-05
1583713	1583687	1582926	1582641	-	ydeO	b1499	UV-inducible global regulator, EvgA-, GadE-dependent	16	28	52	20	29	1.7931	0.423588	0.803852	0.717478	1.51906e-05	0.494756	0.45473	0.397552	1	1	0.110173	1.51906e-05
	997868	998407		+	elfA	b0938	laminin-binding fimbrin subunit	13	19	43	16	30	1.43333	0.797872	0.419701	0.298958	1.51906e-05	0.471567	0.924704	0.0770507	1	1	0.207575	1.51906e-05
	4316082	4315525		-	phnN	b4094	ribose 1,5-bisphosphokinase	10	16	38	15	15	2.53333	0.0315294	0.39995	0.250155	1.55326e-05	0.497588	0.392391	0.776407	1	1	0.242544	1.55326e-05
3667593	3667580	3666180	3665950	-	gadA	b3517	glutamate decarboxylase A, PLP-dependent	86	48	158	199	272	0.580882	1	0.0874184	0.0688895	0.678418	6.26999e-05	1.60096e-05	0.903242	1	1	0.0110272	1.60096e-05
	1981612	1980188	1980155	-	otsA	b1896	trehalose-6-phosphate synthase	47	47	106	224	140	0.757143	1	0.00954408	0.282755	0.235072	1.61267e-05	0.133713	0.894761	1	0.000417716	0.00133612	1.61267e-05
3948070	3948086	3948424	3948435	+	yifE	b3764	UPF0438 family protein	152	145	53	83	47	1.12766	1	0.575562	0.0444217	0.828227	0.279745	1.71345e-05	0.453248	1	1	0.0439447	1.71345e-05
1198237	1198237	1197533		-	ymfE	b1138	e14 prophage; putative inner membrane protein	12	20	43	16	15	2.86667	0.00203043	0.409624	0.374907	1.81911e-05	0.499604	0.253191	0.925987	1	1	0.202592	1.81911e-05
2907944	2907941	2906643	2906628	-	eno	b2779	enolase	747	946	154	467	251	0.613546	1	0.297552	1.88053e-05	0.147125	0.464599	0.380874	0.831908	1	1	0.760316	1.88053e-05
2243152			2243410	+	-	predicted RNA	antisense: folE	385	591	170	234	183	0.928962	1	0.811963	0.000171274	0.7585	0.532733	1.92789e-05	0.807981	1	1	0.00148273	1.92789e-05
3648302	3647788	3647705	3647686	-	dinQ	b4613	UV-inducible membrane toxin, DinQ-AgrB type I toxin-antitoxin system	174	427	146	296	145	1.0069	1	0.602309	0.032915	0.444492	0.789745	1.99573e-05	0.161302	1	1	0.147963	1.99573e-05
3071374			3071268	-	-	predicted RNA	-	487	639	144	336	214	0.672897	1	0.401529	2.02185e-05	0.231594	0.490958	8.23363e-05	0.61445	1	1	0.021051	2.02185e-05
2801	2801	3733		+	thrB	b0003	homoserine kinase	439	560	133	200	196	0.678571	1	0.288845	2.0485e-05	0.298485	0.476682	0.24019	0.769388	1	1	0.0816112	2.0485e-05
1907753	1907591	1907448	1907436	-	yobF	b1824	DUF2527 family heat-induced protein	1470	2867	742	1943	1349	0.550037	0.741656	0.777526	2.09471e-05	0.0229449	0.580665	0.635087	0.847938	1	1	0.937681	2.09471e-05
657238	657292	657501	657901	+	cspE	b0623	constitutive cold shock family transcription antitermination protein; negative regulator of cspA transcription; RNA melting protein; ssDNA-binding protein	904	4208	780	3042	1223	0.637776	1	0.55659	2.11758e-05	0.0138679	0.409059	0.300486	0.965451	2.11945e-05	1	0.711046	2.11758e-05
200969	200971	201996	201996	+	lpxD	b0179	UDP-3-O-(3-hydroxymyristoyl)-glucosamine N-acyltransferase	286	442	112	265	168	0.666667	0.989798	0.350009	2.17686e-05	0.054084	0.720398	0.250871	0.710544	1	1	0.71309	2.17686e-05
2685543			2685531	-	-	predicted RNA	-	439	619	181	404	226	0.800885	1	0.3575	2.29153e-05	0.116596	0.458446	0.000170261	0.484572	1	1	0.0403048	2.29153e-05
1982387	1982387	1981587		-	otsB	b1897	trehalose-6-phosphate phosphatase, biosynthetic	49	51	132	255	179	0.73743	1	0.0165112	0.272537	0.118082	2.30947e-05	0.0891985	0.625008	1	0.134226	0.00389093	2.30947e-05
2906654			2907944	+	-	predicted RNA	antisense: eno	764	942	155	457	250	0.62	1	0.288845	2.4882e-05	0.163134	0.462083	0.373929	0.831908	1	1	0.785101	2.4882e-05
1121560	1121487	1121242	1121236	-	dinI	b1061	DNA damage-inducible protein I	77	134	46	71	45	1.02222	1	0.652999	0.0346181	0.941668	0.593097	2.60173e-05	0.593025	1	1	0.011143	2.60173e-05
106517			106554	+	-	predicted RNA	-	316	678	159	440	228	0.697368	1	0.665598	2.65798e-05	0.0913908	0.828576	8.85919e-05	0.40473	1	1	0.0629894	2.65798e-05
3473541	3473514	3471400	3471400	-	fusA	b3340	protein chain elongation factor EF-G, GTP-binding	2792	3873	443	1476	710	0.623944	1	0.910621	2.73985e-05	0.572854	0.837643	0.219077	0.839971	1	1	0.947865	2.73985e-05
735649	735650	736219	736219	+	ybfC	b0704	putative periplasmic protein	26	23	67	26	23	2.91304	0.000324483	0.773119	0.174203	2.78645e-05	0.581156	0.385303	0.968485	1	1	0.383824	2.78645e-05
3707862	3707705	3706098	3706098	-	dppA	b3544	dipeptide transporter	630	772	127	460	205	0.619512	1	0.288845	2.82675e-05	0.0687336	0.461393	0.398364	0.831908	1	1	0.725641	2.82675e-05
	764180	765049	765128	+	sucD	b0729	succinyl-CoA synthetase, NAD(P)-binding, alpha subunit	515	706	156	311	219	0.712329	1	0.325083	2.82675e-05	0.199097	0.475323	0.17564	0.903242	1	1	0.371837	2.82675e-05
3888428	3888435	3888509	3888729	+	tnaC	b3707	tryptophanase leader peptide	22	34	58	35	41	1.41463	0.938112	0.769605	0.53601	2.8416e-05	0.492121	0.769481	0.138256	1	1	0.0626498	2.8416e-05
757051			756873	-	-	predicted RNA	antisense: sdhA	431	693	175	337	269	0.650558	1	0.742393	3.25064e-05	0.313207	0.995942	0.00191442	0.824359	1	1	0.0220881	3.25064e-05
1866491	1866472	1865726	1865686	-	mipA	b1782	scaffolding protein for murein synthesizing machinery	226	246	67	116	78	0.858974	1	0.261437	3.43494e-05	0.315462	0.390522	4.32537e-05	0.60543	1	1	0.0381054	3.43494e-05
2059851			2059926	+	asnU	b1986	Asn tRNA	28	75	76	40	41	1.85366	0.241686	0.782079	0.540862	6.57298e-05	0.498601	0.035289	0.618603	1	1	3.58295e-05	3.58295e-05
311656	312112	312339	313257	+	ykgL	b0295	uncharacterized protein	30	34	71	28	39	1.82051	0.333581	0.462509	0.290727	3.85644e-05	0.500554	0.571708	0.480717	1	1	0.189322	3.85644e-05
136569	136464	135598	135598	-	speE	b0121	spermidine synthase (putrescine aminopropyltransferase)	210	281	78	112	87	0.896552	1	0.383573	4.14122e-05	0.527948	0.460037	6.40379e-05	0.765461	1	1	0.011527	4.14122e-05
1252			666	-	-	predicted RNA	antisense: thrA	621	602	165	237	238	0.693277	0.982293	0.18701	4.18432e-05	0.413363	0.45109	0.105907	0.863732	1	1	0.042933	4.18432e-05
	2989304	2989786	2989786	+	yqeJ	b2848	uncharacterized protein	17	25	43	17	20	2.15	0.113534	0.453007	0.540026	4.24423e-05	0.500697	0.301819	0.659257	1	1	0.0880628	4.24423e-05
3486320			3486051	-	-	predicted RNA	antisense: crp	478	515	135	476	236	0.572034	1	0.301945	4.27656e-05	0.000602623	0.631478	0.0173178	0.123944	1	1	0.599556	4.27656e-05
4506406	4506448	4506573	4508785	+	ythA	b4655	uncharacterized protein	29	35	64	28	26	2.46154	0.0125416	0.736278	0.298958	4.538e-05	0.679618	0.214266	0.874161	1	1	0.124479	4.538e-05
318675	318567	318331	318320	-	rclB	b0303	reactive chlorine species (RCS) stress resistance periplasmic protein	15	29	43	18	22	1.95455	0.248473	0.764232	0.52782	4.61049e-05	0.501111	0.271487	0.565439	1	1	0.025435	4.61049e-05
4190487			4190327	-	sroH	b4691	-	77	128	52	86	42	1.2381	0.967911	0.627099	0.130741	0.907955	0.621993	4.72516e-05	0.303655	1	1	0.0705405	4.72516e-05
1299511	1301182	1302813	1302813	+	oppA	b1243	oligopeptide transporter subunit	1096	1340	176	799	264	0.666667	1	0.367979	4.83228e-05	0.0793619	0.842614	0.158325	0.913662	1	1	0.723196	4.83228e-05
4400456			4400442	-	-	predicted RNA	antisense: hfq	365	521	157	432	218	0.720183	1	0.436349	4.83387e-05	0.0124011	0.683613	0.00199835	0.280091	1	1	0.187928	4.83387e-05
2022616	2022616	2022885	2022892	+	fliQ	b1949	flagellar biosynthesis protein	77	228	88	86	97	0.907216	1	0.57987	0.0490138	0.44412	0.509211	0.00694866	0.770267	1	1	4.96348e-05	4.96348e-05
2467855	2467855	2468217		+	gtrA	b2350	CPS-53 (KpLE1) prophage; bactoprenol-linked glucose translocase (flippase)	61	119	51	68	41	1.2439	0.96348	0.628339	0.129767	0.923109	0.798392	5.04449e-05	0.500193	1	1	0.0472466	5.04449e-05
	4317218	4316082		-	phnM	b4095	ribophosphonate triphosphate hydrolase	11	13	39	15	15	2.6	0.00854314	0.812127	0.1733	5.72667e-05	0.500433	0.47682	0.876203	1	1	0.403301	5.72667e-05
3736886			3737159	+	-	predicted RNA	antisense: bax	291	311	121	483	188	0.643617	1	0.758378	0.0306598	6.09971e-05	0.96684	0.125662	0.00999959	1	1	0.723196	6.09971e-05
3478003			3478491	+	-	predicted RNA	antisense: slyD	502	763	208	437	299	0.695652	0.974992	0.387255	6.13365e-05	0.0825915	0.857839	0.131365	0.619398	1	1	0.424432	6.13365e-05
2079397	2079361	2079032	2078900	-	yeeX	b2007	UPF0265 family protein	332	301	87	141	99	0.878788	1	0.288845	0.000868215	0.633678	0.273116	6.28077e-05	0.717642	1	1	0.0085829	6.28077e-05
3822096	3822106	3822381	3822399	+	rpoZ	b3649	RNA polymerase, omega subunit	307	434	112	256	151	0.741722	1	0.56924	6.31991e-05	0.13122	0.52872	0.000271225	0.484572	1	1	0.118131	6.31991e-05
1795556	1795552	1795253	1795253	-	ihfA	b1712	integration host factor (IHF), DNA-binding protein, alpha subunit	404	586	235	867	347	0.677233	1	0.724754	0.0176874	6.4223e-05	0.475323	0.236829	0.0951851	1	1	0.484595	6.4223e-05
122888	123017	125680	125694	+	aceE	b0114	pyruvate dehydrogenase, decarboxylase component E1, thiamine triphosphate-binding	430	522	84	185	103	0.815534	1	0.30048	6.70585e-05	0.489615	0.834452	0.0635263	0.828895	1	1	0.428585	6.70585e-05
12003	11786	11382	11357	-	yaaI	b0013	UPF0412 family protein	18	17	46	19	27	1.7037	0.404654	0.457502	0.134926	6.91566e-05	0.498079	0.964122	0.429979	1	1	0.406642	6.91566e-05
3268414	3268415	3269602	3270217	+	yhaC	b3121	pentapetide repeats-related protein	22	23	51	19	22	2.31818	0.0783032	0.285265	0.538002	7.0591e-05	0.926011	0.400012	0.748984	1	1	0.243543	7.0591e-05
302973	302991	303605	303605	+	yagU	b0287	DUF1440 family inner membrane protein	229	256	112	149	84	1.33333	1	0.866473	0.0384662	0.666184	0.409059	7.33968e-05	0.37992	1	1	0.156354	7.33968e-05
3917375	3917375	3915993	3915973	-	atpD	b3732	F1 sector of membrane-bound ATP synthase, beta subunit	719	958	158	465	219	0.721461	1	0.457818	7.86018e-05	0.190587	0.460037	0.204924	0.831908	1	1	0.767035	7.86018e-05
	4321247	4320663		-	phnH	b4100	ribophosphonate triphosphate synthase subunit	7	15	30	12	12	2.5	0.0421706	0.829884	0.335597	7.87981e-05	0.496791	0.309786	0.816794	1	1	0.176296	7.87981e-05
3847167	3847167	3845776	3845764	-	uhpT	b3666	hexose phosphate transporter	94	86	65	185	53	1.22642	1	0.481689	0.34997	0.00759039	0.961902	0.167262	7.89985e-05	1	1	0.265849	7.89985e-05
2520698	2520672	2519257	2518468	-	gltX	b2400	glutamyl-tRNA synthetase	172	258	71	127	86	0.825581	1	0.383573	8.02715e-05	0.146083	0.941724	0.0108999	0.578054	1	1	0.28863	8.02715e-05
637769	637618	636716	636570	-	ybdO	b0603	putative DNA-binding transcriptional regulator	9	20	43	17	20	2.15	0.122477	0.380503	0.521422	8.07195e-05	0.476501	0.409619	0.707107	1	1	0.226612	8.07195e-05
2313084			2313176	+	micF	b4439	-	13	21	38	24	18	2.11111	0.228006	0.440085	0.347785	8.20804e-05	0.499604	0.510226	0.76344	1	1	0.183884	8.20804e-05
2101165			2101209	+	-	predicted RNA	antisense: gnd	468	555	135	257	204	0.661765	1	0.300281	8.21087e-05	0.558912	0.409059	0.000497574	0.884119	1	1	0.000944282	8.21087e-05
201913			201781	-	-	predicted RNA	antisense: lpxD	325	578	140	359	205	0.682927	1	0.850602	8.32836e-05	0.115746	0.939181	0.000351461	0.479661	1	1	0.109406	8.32836e-05
3072536			3072554	+	-	predicted RNA	antisense: pgk	376	568	162	351	223	0.726457	1	0.634214	8.35514e-05	0.191707	0.826576	0.00182632	0.664893	1	1	0.0360835	8.35514e-05
2017946	2017946	2018389		+	fliJ	b1942	flagellar protein	99	195	77	74	74	1.04054	1	0.50697	0.0337912	0.496594	0.740956	0.00113388	0.875631	1	1	8.45716e-05	8.45716e-05
432107	432013	431129	430585	-	tsx	b0411	nucleoside channel, receptor of phage T6 and colicin K	253	259	74	116	91	0.813187	1	0.222656	8.62115e-05	0.392921	0.390522	0.00117389	0.776407	1	1	0.0426595	8.62115e-05
3317526	3317526	3316039	3316039	-	nusA	b3169	transcription termination/antitermination L factor	179	361	87	127	100	0.87	1	0.877994	8.87551e-05	0.344826	0.995478	0.00937828	0.815075	0.812946	1	0.0797768	8.87551e-05
4160951	4160790	4159390	4158470	-	sthA	b3962	pyridine nucleotide transhydrogenase, soluble	123	220	62	117	76	0.815789	1	0.845984	8.87867e-05	0.115714	0.538815	0.00894869	0.535167	1	1	0.308727	8.87867e-05
3172973	3172211	3171879	3169808	-	ygiZ	b3027	inner membrane protein	29	25	56	23	29	1.93103	0.22616	0.482845	0.26535	8.93067e-05	0.51215	0.567406	0.586941	1	1	0.256929	8.93067e-05
1151852			1151899	+	-	predicted RNA	-	438	629	179	427	219	0.817352	1	0.864146	0.00471388	0.261063	0.435127	8.94355e-05	0.292908	1	1	0.11602	8.94355e-05
3072259			3072284	+	-	predicted RNA	antisense: pgk	398	562	162	378	243	0.666667	1	0.488212	9.00938e-05	0.11863	0.887434	0.00756368	0.691482	1	1	0.0668593	9.00938e-05
1237259	1237241	1235709	1235709	-	ycgB	b1188	SpoVR family stationary phase protein	45	37	97	136	125	0.776	1	0.0162144	0.234492	0.424851	9.2577e-05	0.0882975	0.929147	1	0.421996	0.0584851	9.2577e-05
2737496	2737599	2737646	2737744	+	pheL	b2598	pheA gene leader peptide	62	110	54	198	78	0.692308	1	0.562481	0.0682228	9.2937e-05	0.500697	0.177133	0.020481	1	1	0.891889	9.2937e-05
2167114			2167200	+	cyaR	b4438	-	22	35	34	26	24	1.41667	1	0.503143	0.555615	0.0031694	0.510874	0.252452	0.415196	1	1	9.37028e-05	9.37028e-05
4111507	4111507	4110740	4110537	-	tpiA	b3919	triosephosphate isomerase	344	428	122	274	167	0.730539	1	0.286848	9.58725e-05	0.0492475	0.87388	0.0570508	0.515098	1	1	0.458953	9.58725e-05
2819201	2819146	2818961	2818880	-	csrA	b2696	pleiotropic regulatory protein for carbon source metabolism	435	785	219	677	298	0.734899	1	0.954985	0.000101642	0.00337165	0.863911	0.00138125	0.05138	1	1	0.465008	0.000101642
716079	720583	720840	720840	+	ybfK	b4590	uncharacterized protein	8	13	37	16	15	2.46667	0.0456678	0.821412	0.0958961	0.00010169	0.494644	0.734758	0.828895	1	1	0.484459	0.00010169
1926658	1924969	1924595	1924595	-	yobA	b1841	CopC family protein	100	182	89	70	80	1.1125	1	0.489699	0.138639	0.226012	0.627283	0.0101283	0.762595	1	1	0.000103272	0.000103272
283201	283201	285168	285168	+	yagF	b0269	CP4-6 prophage; dehydratase family protein	8	14	40	16	12	3.33333	0.000104564	0.740575	0.264682	0.000470709	0.499604	0.346576	0.817115	1	1	0.415922	0.000104564
932422			932549	+	-	predicted RNA	-	561	696	176	527	330	0.533333	1	0.472821	0.000110084	0.0227348	0.98634	0.0232478	0.541638	1	1	0.283963	0.000110084
3822418			3822289	-	-	predicted RNA	antisense: rpoZ spoT	438	621	156	354	209	0.746411	1	0.604541	0.000142146	0.21579	0.577511	0.000111746	0.515353	1	1	0.0584851	0.000111746
2777972			2777985	+	psaA	b4645	-	83	37	96	63	73	1.31507	0.00395481	0.589193	0.0359149	0.000116525	0.369245	0.948421	0.795328	1	1	0.87939	0.000116525
2404628	2404613	2403951	2403951	-	nuoB	b2287	NADH:ubiquinone oxidoreductase, chain B	247	319	93	200	112	0.830357	1	0.441993	0.00011771	0.0666645	0.548161	0.000931931	0.335897	1	1	0.311086	0.00011771
1948707	1948632	1948180	1948152	-	nudB	b1865	dihydroneopterin triphosphate pyrophosphatase	84	158	64	84	53	1.20755	1	0.532922	0.0589111	0.972695	0.925834	0.000117987	0.616759	1	1	0.0238956	0.000117987
1704746	1704949	1705164	1705235	+	cnu	b1625	nucleoid-associated oriC-binding protein; H-NS and StpA stabilizing factor	20	31	42	19	21	2	0.23807	0.724066	0.68803	0.000118045	0.514649	0.195178	0.628568	1	1	0.0122085	0.000118045
2561368	2561368	2561613	2561613	+	yffM	b2444	CPZ-55 prophage; uncharacterized protein	37	39	91	38	60	1.51667	0.604373	0.456842	0.253761	0.000118045	0.494556	0.926589	0.295353	1	1	0.295408	0.000118045
3043155	3043148	3042489	3042449	-	yqfA	b2899	hemolysin III family HylIII inner membrane protein	90	323	174	125	105	1.65714	0.672643	0.0740921	0.192041	0.282604	0.390522	0.000121648	0.831908	1	1	0.00336712	0.000121648
1637010	1637047	1637457	1641012	+	ydfO	b1549	Qin prophage; uncharacterized protein	16	21	40	17	18	2.22222	0.0974959	0.458296	0.347785	0.000125258	0.502177	0.34155	0.750613	1	1	0.170627	0.000125258
1245064	1245160	1245600	1245600	+	ycgY	b1196	uncharacterized protein	24	25	76	31	40	1.9	0.286879	0.426061	0.127903	0.000126602	0.494756	0.938222	0.577743	1	1	0.430283	0.000126602
572361	572368	572469		+	ylcH	b4588	uncharacterized protein, DLP12 prophage	28	37	80	36	46	1.73913	0.482072	0.777206	0.231652	0.000130234	0.498601	0.883056	0.45086	1	1	0.23503	0.000130234
2887354			2887409	+	sokX	b4701	-	33	26	40	28	33	1.21212	1	0.516739	0.5548	0.000133467	0.509159	0.956751	0.0275024	1	1	0.0793162	0.000133467
3599672	3599658	3598555	3597917	-	livJ	b3460	leucine/isoleucine/valine transporter subunit	520	671	139	285	202	0.688119	1	0.330892	0.000138477	0.263147	0.473385	0.266535	0.826384	1	1	0.398991	0.000138477
1988211	1988222	1988545	1988545	+	yecR	b1904	lipoprotein, function unknown	58	112	62	48	57	1.08772	1	0.580318	0.270153	0.11863	0.529372	0.0364255	0.635405	1	1	0.000139141	0.000139141
2000385	2000385	1999585	1999585	-	fliY	b1920	cystine transporter subunit	316	429	123	206	137	0.89781	1	0.330657	0.00014095	0.186244	0.514649	0.00309488	0.566367	1	1	0.236619	0.00014095
2995233	2990360	2989935	2989935	-	yqeK	b2849	uncharacterized protein	13	23	43	18	18	2.38889	0.0624367	0.425572	0.407067	0.000142131	0.499604	0.29129	0.80462	1	1	0.144018	0.000142131
1968503	1968501	1967452	1967452	-	cheB	b1883	fused chemotaxis regulator: protein-glutamate methylesterase in two-component regulatory system with CheA	125	204	72	68	70	1.02857	1	0.769428	0.00396291	0.743999	0.9156	0.000517377	0.932546	1	1	0.000144474	0.000144474
781577			781652	+	lysQ	b0749	Lys tRNA	53	103	55	48	50	1.1	1	0.556736	0.139197	0.235773	0.591737	0.0172967	0.75497	1	1	0.000145005	0.000145005
	3721198	3722049	3722075	+	insK	b3558	IS150 transposase B	23	37	55	22	29	1.89655	0.381139	0.718169	0.832543	0.000146389	0.504538	0.306547	0.542784	1	1	0.0438343	0.000146389
2113433	2113061	2111976		-	rfbB	b2041	dTDP-glucose 4,6 dehydratase, NAD(P)-binding	96	159	66	87	53	1.24528	1	0.480669	0.0246513	0.662492	0.811512	0.000147651	0.484572	1	1	0.128132	0.000147651
1130870	1130863	1130204	1130129	-	flgA	b1072	assembly protein for flagellar basal-body periplasmic P ring	181	241	78	103	82	0.95122	1	0.751355	0.00133731	0.791004	0.502971	0.000154916	0.803322	1	1	0.00723734	0.000154916
3477502	3477419	3476607	3476606	-	fkpA	b3347	FKBP-type peptidyl-prolyl cis-trans isomerase (rotamase)	200	302	89	196	116	0.767241	1	0.643255	0.000155947	0.0490272	0.877123	0.0101258	0.41766	1	1	0.400267	0.000155947
3519069	3519064	3518543	3518487	-	aroK	b3390	shikimate kinase I	226	380	114	213	127	0.897638	1	0.996318	0.000223206	0.170302	0.858848	0.000157057	0.425857	1	1	0.184011	0.000157057
4156840	4156850	4158223	4158224	+	argH	b3960	argininosuccinate lyase	174	259	105	99	74	1.41892	0.961831	0.949891	0.162744	0.618971	0.497474	0.000161639	0.725907	1	1	0.0330491	0.000161639
427265	427287	427619	427646	+	yajC	b0407	SecYEG protein translocase auxillary subunit	266	354	103	204	121	0.85124	1	0.643255	0.000565979	0.245734	0.489035	0.000161649	0.484572	1	1	0.102272	0.000161649
1914902			1915124	+	-	predicted RNA	antisense: proQ	417	625	177	339	242	0.731405	1	0.755909	0.000168361	0.243706	0.83211	0.00187377	0.681817	1	1	0.0805976	0.000168361
564715	564480	563848	563848	-	sfmZ	b0535	response regulator family protein	19	20	49	20	32	1.53125	0.626185	0.458447	0.289641	0.000168376	0.496448	0.648444	0.294169	1	1	0.321705	0.000168376
2704063	2704063	2703383		-	rnc	b2567	RNase III	100	177	64	108	60	1.06667	1	0.503157	0.00739044	0.39034	0.904772	0.00016885	0.41041	1	1	0.14422	0.00016885
1961932	1961972	1962460	1962715	+	yecT	b1877	uncharacterized protein	20	50	39	21	27	1.44444	0.661969	0.482845	0.465838	0.00699092	0.498601	0.0460886	0.570169	1	1	0.000170874	0.000170874
2597243			2597345	+	-	predicted RNA	antisense: purC	463	621	180	346	216	0.833333	1	0.694447	0.00268197	0.472455	0.500433	0.00017576	0.583875	1	1	0.0365287	0.00017576
2174576	2174566	2174282	2173363	-	gatB	b2093	galactitol-specific enzyme IIB component of PTS	355	623	266	935	361	0.736842	1	0.448174	0.032191	0.000179396	0.445445	0.219021	0.067777	1	1	0.482377	0.000179396
2819236			2819202	-	-	predicted RNA	-	317	583	159	475	218	0.729358	1	0.801795	0.000191883	0.025201	0.897446	0.000864495	0.197573	1	1	0.200002	0.000191883
1399528	1399526	1398774	1398774	-	fnr	b1334	oxygen-sensing anaerobic growth regulon transcriptional regulator; autorepressor	237	401	118	263	147	0.802721	1	0.782197	0.000195954	0.0498885	0.546216	0.0194544	0.4257	1	1	0.450697	0.000195954
3478498	3478497	3477907	3477881	-	slyD	b3349	FKBP-type peptidyl prolyl cis-trans isomerase (rotamase)	455	662	187	392	274	0.682482	0.980636	0.364191	0.000202869	0.0922414	0.886584	0.251967	0.688312	1	1	0.453362	0.000202869
2531251	2531233	2530247	2530247	-	zipA	b2412	FtsZ stabilizer	95	144	49	109	49	1	1	0.9242	0.0028845	0.0744425	0.638449	0.000211388	0.0770507	1	1	0.367136	0.000211388
	1072863	1072171	1072171	-	rutB	b1011	ureidoacrylate amidohydrolase	81	19	92	71	80	1.15	1	0.325226	0.000231918	0.329058	0.432899	0.0166128	0.815075	1	1	0.109997	0.000231918
2044549			2044624	+	asnT	b1977	Asn tRNA	34	102	58	52	37	1.56757	0.741903	0.492451	0.180336	0.267479	0.502971	0.00023858	0.826824	1	1	0.00097198	0.00023858
3915208	3915200	3913830	3913820	-	glmU	b3730	fused N-acetyl glucosamine-1-phosphate uridyltransferase/glucosamine-1-phosphate acetyl transferase	212	295	83	113	95	0.873684	1	0.346732	0.000239696	0.467095	0.618154	0.0101258	0.844436	1	1	0.0621416	0.000239696
255930	255977	256435	256435	+	gpt	b0238	xanthine phosphoribosyltransferase; xanthine-guanine phosphoribosyltransferase	154	214	73	84	79	0.924051	1	0.945778	0.00687166	0.814105	0.765343	0.000667448	0.968091	1	1	0.00024136	0.00024136
1648665	1648665	1648793	1648821	+	ydfB	b1572	Qin prophage; uncharacterized protein	38	46	82	37	49	1.67347	0.469132	0.472856	0.340841	0.00025903	0.500554	0.55811	0.483646	1	1	0.139767	0.00025903
3737183	3737177	3736353	3735778	-	bax	b3570	putative glucosaminidase	225	296	117	416	174	0.672414	0.938112	0.861776	0.0211632	0.00025903	0.511465	0.385015	0.344652	1	1	0.769728	0.00025903
	733776	734102	735648	+	ybfB	b0702	putative membrane protein	11	15	30	14	13	2.30769	0.0874408	0.747636	0.277298	0.000275561	0.511465	0.37528	0.824812	1	1	0.23319	0.000275561
444683	444683	445174	445294	+	yajQ	b0426	phage Phi6 host factor, ATP/GTP binding protein	166	212	78	141	75	1.04	1	0.911137	0.0116895	0.317989	0.478895	0.000283728	0.300065	1	1	0.205438	0.000283728
1072170	1072159	1071773	1071766	-	rutC	b1010	putative aminoacrylate deaminase, reactive intermediate detoxification; weak enamine/imine deaminase activity	59	18	85	59	73	1.16438	1	0.641538	0.000287078	0.115415	0.516493	0.00638272	0.655567	1	1	0.146737	0.000287078
4400385			4400352	-	-	predicted RNA	antisense: hfq	356	485	142	426	203	0.699507	1	0.528173	0.00029397	0.0139543	0.709957	0.00435092	0.253145	1	1	0.239213	0.00029397
4612032	4612128	4612289	4612296	+	ytjA	b4568	uncharacterized protein	122	92	113	467	167	0.676647	1	0.60366	0.601598	0.000294803	0.502777	0.94103	0.00338781	1	1	0.00280853	0.000294803
3270592			3270216	-	rnpB	b3123	-	4766	19673	1898	6722	2140	0.886916	1	0.447401	0.000307915	0.807765	0.476504	0.0027666	0.861745	0.619931	1	0.531425	0.000307915
3187416	3189881	3190630	3190631	+	yqiH	b3047	putative periplasmic pilin chaperone	20	27	47	20	26	1.80769	0.412253	0.755909	0.797967	0.000315015	0.500697	0.420267	0.538759	1	1	0.151999	0.000315015
3346151	3346173	3346460	3346460	+	hpf	b3203	ribosome hibernation promoting factor HPF; stabilizes 70S dimers (100S)	277	348	94	255	151	0.622517	1	0.514111	0.000315103	0.0459456	0.727623	0.0088678	0.483646	1	1	0.280702	0.000315103
	2469131	2470462	2470671	+	gtrS	b2352	serotype-specific glucosyl transferase, CPS-53 (KpLE1) prophage	37	44	33	21	16	2.0625	0.160734	0.436775	0.346877	0.0932177	0.467457	0.000326122	0.780776	1	1	0.00791912	0.000326122
963669	963828	964112	964112	+	ihfB	b0912	integration host factor (IHF), DNA-binding protein, beta subunit	357	387	108	243	148	0.72973	1	0.390777	0.000328111	0.139243	0.453309	0.00137993	0.515098	1	1	0.159421	0.000328111
2101592	2101268	2099862	2099829	-	gnd	b2029	6-phosphogluconate dehydrogenase, decarboxylating	405	496	108	224	158	0.683544	1	0.326249	0.000339908	0.250414	0.472907	0.302981	0.825977	1	1	0.422339	0.000339908
1649593	1647850	1647620	1645873	-	dicC	b1569	Qin prophage; DNA-binding transcriptional regulator for DicB	25	20	45	21	30	1.5	0.649696	0.48869	0.212825	0.000349757	0.500697	0.962458	0.344652	1	1	0.35287	0.000349757
	2600478	2600948	2600948	+	bcp	b2480	peroxiredoxin; thiol peroxidase, thioredoxin-dependent	359	408	125	296	178	0.702247	1	0.359032	0.000360462	0.034817	0.715415	0.022932	0.436834	1	1	0.395605	0.000360462
2364554	2364554	2364979	2365222	+	nudI	b2251	nucleoside triphosphatase	24	30	60	26	34	1.76471	0.333581	0.457818	0.441633	0.000362126	0.498601	0.443391	0.577743	1	1	0.228256	0.000362126
3356091			3355880	-	-	predicted RNA	antisense: gltB	598	663	197	354	323	0.609907	1	0.410712	0.000371726	0.311684	0.806847	0.0335581	0.923238	1	1	0.0710047	0.000371726
1269858			1269923	+	rdlB	b4422	-	27	23	54	36	45	1.2	1	0.480817	0.0826263	0.000373446	0.494756	0.395711	0.0754291	1	1	0.717377	0.000373446
272580			272654	+	eyeA	b4690	-	34	34	53	35	41	1.29268	1	0.50208	0.681252	0.000374639	0.500554	0.770129	0.155639	1	1	0.0669127	0.000374639
4128480	4128395	4128078	4127920	-	metJ	b3938	transcriptional repressor, S-adenosylmethionine-binding	143	126	51	97	47	1.08511	1	0.552354	0.0949942	0.514258	0.310125	0.000381593	0.18917	1	1	0.219928	0.000381593
2807132	2807132	2808124	2808245	+	proX	b2679	glycine betaine transporter subunit	213	254	78	110	96	0.8125	1	0.325226	0.000382106	0.519525	0.514538	0.00895138	0.877818	1	1	0.0399112	0.000382106
3270224			3270583	+	-	predicted RNA	antisense: rnpB	4966	20515	1946	7027	2241	0.868362	1	0.444861	0.000386733	0.812597	0.476682	0.00299694	0.861705	0.619931	1	0.536712	0.000386733
1813849	1813867	1816128	1816131	+	katE	b1732	catalase HPII, heme d-containing	60	45	108	196	147	0.734694	1	0.133066	0.158793	0.900534	0.0103043	0.0209061	0.775641	1	0.490608	0.000388707	0.000388707
	2016554	2017927	2017933	+	fliI	b1941	flagellum-specific ATP synthase	101	219	66	79	71	0.929577	1	0.524775	0.000391145	0.80376	0.500697	0.00106736	0.918417	1	1	0.00500415	0.000391145
	755560	755907		+	sdhD	b0722	succinate dehydrogenase, membrane subunit, binds cytochrome b556	236	371	109	152	135	0.807407	1	0.887126	0.000391145	0.783782	0.797096	0.000679221	0.934034	1	1	0.00180338	0.000391145
447705	447705	446815	446810	-	cyoE	b0428	protoheme IX farnesyltransferase	296	419	122	180	157	0.77707	1	0.367979	0.000395239	0.329545	0.744331	0.0808661	0.932546	1	1	0.142157	0.000395239
	1137371	1138312	1138377	+	flgJ	b1081	flagellar rod assembly protein and murein hydrolase; flagellum-specific muramidase	126	237	84	97	79	1.06329	1	0.488342	0.00508425	0.915808	0.852485	0.000406696	0.826824	1	1	0.0114597	0.000406696
4260576	4260599	4261306	4261605	+	yjbM	b4048	uncharacterized protein	24	35	59	25	27	2.18519	0.114273	0.748673	0.945207	0.000408203	0.504157	0.276399	0.785877	1	1	0.124479	0.000408203
4404958			4404772	-	-	predicted RNA	antisense: purA	570	618	176	448	222	0.792793	1	0.405427	0.000415896	0.0531907	0.432899	0.000505583	0.197573	1	1	0.292545	0.000415896
3328845	3328715	3328239	3328157	-	greA	b3181	transcript cleavage factor	89	150	62	88	53	1.16981	1	0.544419	0.066331	0.876313	0.851859	0.000416341	0.552446	1	1	0.0639539	0.000416341
1800641	1800638	1800096	1800096	-	infC	b1718	translation initiation factor IF-3	1745	3069	484	1683	734	0.659401	1	0.803357	0.000426971	0.164941	0.475323	0.284567	0.835457	1	1	0.730654	0.000426971
1795256			1795775	+	-	predicted RNA	antisense: pheT ihfA	371	513	208	743	326	0.638037	0.938112	0.897962	0.0369752	0.000437523	0.50792	0.767221	0.525899	1	1	0.713276	0.000437523
4152509			4152610	+	-	predicted RNA	antisense: ppc	567	601	155	316	302	0.513245	1	0.34727	0.000438489	0.400725	0.776651	0.0399932	0.937054	1	1	0.0211725	0.000438489
	281983	280829		-	yagA	b0267	CP4-6 prophage; putative DNA-binding transcriptional regulator	12	13	40	17	18	2.22222	0.107729	0.7962	0.169265	0.000470709	0.499604	0.620008	0.798739	1	1	0.43589	0.000470709
568648	568902	570428	570892	+	ybcK	b0544	DLP12 prophage; putative recombinase	19	22	50	20	24	2.08333	0.209872	0.0967552	0.473948	0.000490352	0.443227	0.482463	0.712832	1	1	0.327597	0.000490352
2620160	2620160	2618871	2618781	-	uraA	b2497	uracil permease	138	134	69	49	71	0.971831	1	0.815631	0.125037	0.260773	0.80827	0.115122	0.527532	1	1	0.000490716	0.000490716
4257115	4257115	4257723	4257723	+	lexA	b4043	transcriptional repressor of SOS regulon	104	199	78	108	71	1.09859	1	0.462681	0.0172618	0.706038	0.696095	0.000497574	0.604499	1	1	0.0670635	0.000497574
1269323			1269389	+	rdlA	b4420	-	40	61	61	44	50	1.22	1	0.506428	0.653695	0.00606916	0.500697	0.290087	0.344053	1	1	0.000500728	0.000500728
	1649609	1649797		+	dicB	b1575	Qin prophage; cell division inhibition protein	13	20	39	19	19	2.05263	0.130621	0.782211	0.277288	0.000506013	0.498601	0.391128	0.7894	1	1	0.257504	0.000506013
2905711	2905711	2906583	2906624	+	ygcG	b2778	uncharacterized protein	22	29	54	22	30	1.8	0.482072	0.715433	0.791983	0.000506013	0.502971	0.457995	0.527532	1	1	0.187898	0.000506013
3597696	3597560	3596451	3596404	-	livK	b3458	leucine transporter subunit	238	247	76	110	81	0.938272	1	0.250085	0.000510156	0.451773	0.377302	0.000725821	0.709098	1	1	0.0699487	0.000510156
3926461	3926455	3926012	3925997	-	mioC	b3742	FMN-binding protein MioC	145	301	103	174	108	0.953704	1	0.474858	0.00343365	0.371983	0.538815	0.000528094	0.524749	1	1	0.11987	0.000528094
729583	729583	733776		+	rhsC	b0700	Rhs family putative polymorphic toxin	19	18	54	34	28	1.92857	0.800457	0.000534761	0.108496	0.259921	0.390522	0.702908	0.844436	1	1	0.462978	0.000534761
3086104	3086051	3085920	3085912	-	yqgB	b2939	uncharacterized protein	120	149	55	89	54	1.01852	1	0.676634	0.0730169	0.909323	0.418902	0.00053664	0.606863	1	1	0.0323381	0.00053664
785628	785633	786685	787567	+	aroG	b0754	3-deoxy-D-arabino-heptulosonate-7-phosphate synthase, phenylalanine repressible	436	646	144	344	224	0.642857	1	0.718169	0.000543748	0.177936	0.475323	0.47086	0.826824	1	1	0.914873	0.000543748
4467406	4467431	4467484	4467522	+	mgtL	b4702	regulatory leader peptide for mgtA	214	357	110	328	132	0.833333	1	0.676894	0.0037888	0.0380368	0.870996	0.000568536	0.0388291	1	1	0.289065	0.000568536
4056463	4058407	4060230	4060257	+	typA	b3871	GTP-binding protein	414	639	117	265	163	0.717791	1	0.782197	0.000573107	0.339301	0.476461	0.279235	0.828895	1	1	0.764428	0.000573107
	2468214	2469134		+	gtrB	b2351	CPS-53 (KpLE1) prophage; bactoprenol glucosyl transferase	75	115	64	54	42	1.52381	0.905409	0.399415	0.154106	0.45329	0.9523	0.000578998	0.807472	1	1	0.0112288	0.000578998
507204			507287	+	chiX	b4585	-	21	41	70	39	42	1.66667	0.437434	0.797123	0.435563	0.000586989	0.48281	0.508703	0.572679	1	1	0.15247	0.000586989
4013005	4013053	4015314	4015314	+	metE	b3829	5-methyltetrahydropteroyltriglutamate-homocysteine S-methyltransferase	1975	2098	208	542	273	0.761905	1	0.649756	0.00059113	0.791274	0.872336	0.0202354	0.837706	1	1	0.247848	0.00059113
2405114	2405072	2404629	2404629	-	nuoA	b2288	NADH:ubiquinone oxidoreductase, membrane subunit A	226	292	94	184	106	0.886792	1	0.724702	0.00161509	0.206613	0.514078	0.000604516	0.429979	1	1	0.180444	0.000604516
2089994	2089996	2090046	2090112	+	hisL	b2018	his operon leader peptide	258	498	139	445	186	0.747312	1	0.653471	0.00378896	0.0382715	0.87027	0.000617386	0.04946	1	1	0.304433	0.000617386
1798214			1798235	+	-	predicted RNA	antisense: pheS	269	376	131	461	179	0.731844	1	0.888003	0.00335129	0.000645862	0.984881	0.0167992	0.0208769	1	1	0.458103	0.000645862
564723			564799	+	argU	b0536	Arg tRNA	30	103	55	51	44	1.25	1	0.485023	0.140341	0.324746	0.498601	0.00266747	0.982758	1	1	0.00065546	0.00065546
3784442	3784442	3784191	3784188	-	grxC	b3610	glutaredoxin 3	199	233	83	146	87	0.954023	1	0.819918	0.0279523	0.586917	0.474298	0.00067527	0.524749	1	1	0.0913264	0.00067527
4400203	4400288	4400596	4400596	+	hfq	b4172	global sRNA chaperone; HF-I, host factor for RNA phage Q beta replication	327	450	139	389	198	0.70202	1	0.747392	0.000684582	0.0112163	0.950584	0.0106609	0.18282	1	1	0.468446	0.000684582
	1197532	1196867	1196862	-	ymfD	b1137	e14 prophage; putative SAM-dependent methyltransferase	20	27	53	24	23	2.30435	0.0466725	0.460694	0.542897	0.000727758	0.501111	0.324377	0.879296	1	1	0.255603	0.000727758
2191679	2191645	2190926	2190911	-	yehC	b2110	putative periplasmic pilin chaperone	18	17	40	18	22	1.81818	0.14624	0.476111	0.298958	0.000727758	0.500697	0.156375	0.621547	1	1	0.345115	0.000727758
3499448	3499448	3499615	3499901	+	yhfL	b3369	small lipoprotein	26	22	39	20	26	1.5	0.430672	0.685269	0.325285	0.000727758	0.515072	0.816292	0.38803	1	1	0.197608	0.000727758
2535794	2535834	2536343	2537184	+	crr	b2417	glucose-specific enzyme IIA component of PTS	657	769	227	799	398	0.570352	0.829879	0.31139	0.000738602	0.000845502	0.538221	0.939878	0.876198	1	1	0.685877	0.000738602
3192208	3192208	3192837	3192863	+	yqiJ	b3050	DUF1449 family inner membrane protein	30	30	61	27	35	1.74286	0.532185	0.715332	0.560998	0.000749942	0.504538	0.509663	0.532082	1	1	0.269959	0.000749942
233690			233948	+	-	predicted RNA	antisense: mltD	245	489	178	596	213	0.835681	1	0.471382	0.00800179	0.000756795	0.453765	0.00927835	0.00242319	1	1	0.898712	0.000756795
80912			81034	+	-	predicted RNA	antisense: leuB	395	551	148	477	299	0.494983	1	0.646479	0.000759902	0.0146714	0.661695	0.0670511	0.547933	1	1	0.344827	0.000759902
4472636	4472533	4472399	4472396	-	pyrL	b4246	pyrBI operon leader peptide	161	179	92	82	81	1.1358	1	0.66338	0.262453	0.211887	0.435127	0.00733894	0.861826	1	1	0.000760516	0.000760516
4410007	4410133	4410534	4410548	+	yjfI	b4181	DUF2170 family protein	6	18	33	15	16	2.0625	0.160734	0.837142	0.34997	0.000776272	0.471855	0.114303	0.776407	1	1	0.194163	0.000776272
2022893	2022893	2023678	2023821	+	fliR	b1950	flagellar export pore protein	30	98	60	41	44	1.36364	1	0.876247	0.239258	0.137226	0.514039	0.0136868	0.824359	0.21746	1	0.000806388	0.000806388
152828	152812	152243	152232	-	yadM	b0138	putative fimbrial-like adhesin protein	18	19	45	20	30	1.5	0.672643	0.454271	0.267058	0.000816727	0.494756	0.935809	0.4257	1	1	0.358207	0.000816727
3113542	3113477	3113067	3112690	-	yghG	b2971	secretin (GspDbeta) OM localization lipoprotein pilotin	19	31	54	25	28	1.92857	0.199141	0.439569	0.5548	0.000825425	0.496948	0.346576	0.726115	1	1	0.180678	0.000825425
3966417	3966417	3967676	3967748	+	rho	b3783	transcription termination factor	339	568	126	259	162	0.777778	1	0.756037	0.000830148	0.274983	0.475323	0.16175	0.842363	1	1	0.471322	0.000830148
4557377	4556320	4555490	4555376	-	yjiC	b4325	uncharacterized protein	21	24	42	19	25	1.68	0.552269	0.723597	0.832431	0.000845502	0.502971	0.449645	0.526572	1	1	0.17566	0.000845502
754089			754654	+	-	predicted RNA	antisense: gltA	486	691	205	473	479	0.427975	0.392116	0.383573	0.000856722	0.0653529	0.753559	0.757318	0.776407	1	1	0.888738	0.000856722
3852875			3852993	+	-	predicted RNA	antisense: ivbL	303	783	251	662	293	0.856655	1	0.514517	0.0041293	0.0469548	0.461182	0.000859177	0.067777	1	1	0.394565	0.000859177
2810770	2810770	2811300	2811304	+	mprA	b2684	transcriptional repressor of microcin B17 synthesis and multidrug efflux	118	150	60	77	55	1.09091	1	0.797347	0.04356	0.975937	0.599571	0.000872113	0.77483	1	1	0.0183983	0.000872113
932550	932595	933089	933097	+	lrp	b0889	leucine-responsive global transcriptional regulator	454	504	161	445	292	0.55137	0.609681	0.300281	0.000881396	0.00864869	0.753223	0.38242	0.601242	1	1	0.844383	0.000881396
958742	958812	960095	960108	+	aroA	b0908	5-enolpyruvylshikimate-3-phosphate synthetase	165	243	76	125	95	0.8	1	0.568411	0.000891621	0.204558	0.609225	0.0528448	0.756272	1	1	0.269959	0.000891621
454192	454167	453589	453583	-	yajG	b0434	putative lipoprotein	139	174	73	84	65	1.12308	1	0.87898	0.036826	0.909323	0.500554	0.000903478	0.813908	1	1	0.0134017	0.000903478
80352			80389	+	-	predicted RNA	antisense: leuC	373	496	146	461	320	0.45625	0.797872	0.634308	0.000921627	0.0123146	0.742209	0.121618	0.695068	1	1	0.295408	0.000921627
1213252	1213107	1212703	1212557	-	ycgX	b1161	DUF1398 family protein	17	29	62	28	36	1.72222	0.367367	0.405969	0.335855	0.000955816	0.474298	0.51042	0.616759	1	1	0.302687	0.000955816
1004749	1004768	1005778	1005799	+	pyrD	b0945	dihydro-orotate oxidase, FMN-linked	108	133	55	52	55	1	1	0.945778	0.0256234	0.657962	0.678074	0.00526521	0.870356	1	1	0.000963992	0.000963992
3185325	3185414	3185965	3186186	+	ygiL	b3043	putative fimbrial-like adhesin protein	33	29	55	25	43	1.27907	1	0.698264	0.538211	0.000981351	0.502177	0.79817	0.137529	1	1	0.241483	0.000981351
888054			887976	-	rybB	b4417	-	32	32	69	40	49	1.40816	0.935705	0.477505	0.229698	0.00102656	0.498601	0.889567	0.345229	1	1	0.424432	0.00102656
2737138	2737154	2737495	2737495	+	raiA	b2597	cold shock protein associated with 30S ribosomal subunit	121	112	100	347	146	0.684932	1	0.501563	0.464619	0.00103329	0.417703	0.54945	0.0327807	1	1	0.22243	0.00103329
107475	107705	108217	108218	+	secM	b0097	regulator of secA translation	97	171	64	109	64	1	1	0.530552	0.0219957	0.488518	0.886119	0.00106736	0.500193	1	1	0.139767	0.00106736
932066	932050	931085	931072	-	trxB	b0888	thioredoxin reductase, FAD/NAD(P)-binding	211	237	77	149	96	0.802083	1	0.328732	0.00108123	0.113071	0.523114	0.01751	0.525634	1	1	0.347467	0.00108123
1882653			1882639	-	-	predicted RNA	antisense: dmlA	246	81	272	244	314	0.866242	1	0.545445	0.00431407	0.267386	0.505994	0.00108937	0.429979	1	1	0.157459	0.00108937
961201	961201	961884	961918	+	cmk	b0910	cytidylate kinase	169	271	92	138	99	0.929293	1	0.839753	0.00216008	0.473971	0.951909	0.00108937	0.666296	1	1	0.0831697	0.00108937
3720409	3720680	3721201		+	insJ	b3557	IS150 transposase A	35	42	50	23	28	1.78571	0.350371	0.53914	0.577033	0.00109473	0.672082	0.154428	0.639582	1	1	0.0117168	0.00109473
434627	434647	435117	435136	+	ribE	b0415	riboflavin synthase beta chain	175	279	88	137	112	0.785714	1	0.962145	0.00114227	0.547232	0.99799	0.00335899	0.828895	1	1	0.0295075	0.00114227
	1962972	1962580	1962574	-	flhE	b1878	proton seal during flagellar secretion	48	105	63	47	51	1.23529	1	0.55144	0.298958	0.133095	0.509211	0.023584	0.799424	1	1	0.00114673	0.00114673
3915559			3921663	+	-	predicted RNA	antisense: atpB atpA atpD atpC atpF atpE atpH atpG	855	1128	149	539	225	0.662222	1	0.838568	0.00114893	0.370921	0.836169	0.385015	0.845163	1	1	0.74377	0.00114893
2240471	2240348	2239350	2239349	-	mglB	b2150	methyl-galactoside transporter subunit	45	63	58	146	50	1.16	1	0.322912	0.428136	0.0192147	0.432899	0.309754	0.00115598	1	1	0.334795	0.00115598
79246			79334	+	-	predicted RNA	antisense: leuD	360	545	145	477	335	0.432836	0.809118	0.667081	0.00116405	0.019731	0.473385	0.142746	0.725498	1	1	0.318875	0.00116405
848175	848004	847258	847254	-	glnH	b0811	glutamine transporter subunit	207	276	90	223	116	0.775862	1	0.638163	0.00119246	0.0212471	0.99799	0.0181308	0.234276	1	1	0.471322	0.00119246
79453	79453	78848	77376	-	leuD	b0071	3-isopropylmalate dehydratase small subunit	366	498	159	447	312	0.509615	0.553847	0.476111	0.00119247	0.00877026	0.716337	0.95291	0.944096	1	1	0.744563	0.00119247
1903039	1903082	1903882	1903882	+	manY	b1818	mannose-specific enzyme IIC component of PTS	258	358	115	308	132	0.871212	1	0.530552	0.00119458	0.0131489	0.872336	0.0150662	0.161953	1	1	0.947513	0.00119458
3853002	3852988	3852890	3852875	-	ivbL	b3672	ilvB operon leader peptide	307	790	260	665	300	0.866667	1	0.607653	0.00821956	0.0786976	0.48954	0.00121291	0.0957147	0.339913	1	0.339711	0.00121291
3991189			3991094	-	-	predicted RNA	antisense: cyaA	292	549	148	434	226	0.654867	1	0.727489	0.00126543	0.0562519	0.60245	0.00341417	0.326731	1	1	0.249861	0.00126543
2992094	2992094	2993470	2993560	+	ygeH	b2852	putative transcriptional regulator	21	28	48	20	24	2	0.254567	0.203407	0.885561	0.00128423	0.481776	0.348055	0.739129	1	1	0.180282	0.00128423
1203268	1203268	1203825		+	ymfL	b1147	e14 prophage; putative DNA-binding transcriptional regulator	20	32	51	24	31	1.64516	0.532185	0.456416	0.91481	0.00134145	0.497939	0.396407	0.552446	1	1	0.133656	0.00134145
4594729	4594722	4593361	4592036	-	yjjL	b4356	L-galactonate transporter	71	117	67	59	44	1.52273	0.938112	0.372337	0.179735	0.649574	0.978797	0.00135113	0.719711	1	1	0.0588591	0.00135113
28374	28374	29195	29217	+	dapB	b0031	dihydrodipicolinate reductase	130	148	109	192	366	0.297814	0.00470108	0.405427	0.325746	0.160937	0.00136749	0.158061	0.45821	1	1	0.791492	0.00136749
3376776	3376776	3376279	3376275	-	sspB	b3228	ClpXP protease specificity enhancing factor	169	248	78	154	96	0.8125	1	0.887522	0.0013792	0.216613	0.780644	0.00193912	0.527532	1	1	0.162587	0.0013792
1019019			1020177	+	-	predicted RNA	antisense: ompA	5080	5760	720	3785	1445	0.49827	1	0.909711	0.00138522	0.10773	0.455843	0.93692	0.845163	1	1	0.725094	0.00138522
3967628	3965630	3964365	3964230	-	rhlB	b3780	ATP-dependent RNA helicase	178	302	92	191	128	0.71875	1	0.842621	0.00138539	0.107707	0.837588	0.276978	0.677492	1	1	0.605092	0.00138539
	3343380	3343937	3343943	+	lptA	b3200	periplasmic LPS-binding protein	147	243	78	145	100	0.78	1	0.864809	0.00139082	0.24985	0.87445	0.00504024	0.636121	1	1	0.146961	0.00139082
2427799	2427791	2427009	2427009	-	argT	b2310	lysine/arginine/ornithine transporter subunit	110	110	73	230	108	0.675926	1	0.516016	0.257542	0.00139135	0.463654	0.571559	0.123944	1	1	0.301685	0.00139135
2641830	2641804	2640686	2640576	-	ispG	b2515	1-hydroxy-2-methyl-2-(E)-butenyl 4-diphosphate synthase	116	197	65	137	81	0.802469	1	0.819413	0.0014083	0.0686477	0.532132	0.0173776	0.415196	1	1	0.40935	0.0014083
228928			229004	+	aspU	b0206	Asp tRNA	37	31	75	43	70	1.07143	1	0.483512	0.123784	0.00141712	0.494756	0.307066	0.0254409	1	1	0.623389	0.00141712
3959939	3959813	3959532	3957948	-	ppiC	b3775	peptidyl-prolyl cis-trans isomerase C (rotamase C)	96	155	70	89	61	1.14754	1	0.523265	0.149088	0.85271	0.481732	0.00143942	0.691482	1	1	0.0439447	0.00143942
764948			763761	-	-	predicted RNA	antisense: sucD sucC	545	762	156	331	223	0.699552	1	0.952527	0.0014467	0.333311	0.475323	0.320141	0.826853	1	1	0.647774	0.0014467
3950446	3950507	3950557	3950828	+	ilvX	b4669	uncharacterized protein	225	208	98	103	102	0.960784	1	0.757803	0.0961662	0.535299	0.434643	0.0369957	0.800763	1	1	0.00144959	0.00144959
4118411	4118515	4118760	4119427	+	zapB	b3928	FtsZ stabilizer; septal ring assembly factor, stimulates cell division	233	261	79	183	100	0.79	1	0.545303	0.00466182	0.203978	0.494862	0.00146245	0.425857	1	1	0.180545	0.00146245
1719774	1719876	1720343	1720343	+	slyB	b1641	outer membrane lipoprotein	561	710	224	508	285	0.785965	1	0.34888	0.00148366	0.0591429	0.792004	0.0857607	0.494392	1	1	0.786161	0.00148366
4274103	4274125	4274661	4275277	+	ssb	b4059	single-stranded DNA-binding protein	77	138	77	98	53	1.45283	0.946927	0.440487	0.188504	0.909161	0.909253	0.00148894	0.395026	1	1	0.206828	0.00148894
1413452	1413452	1413237	1413236	-	ydaQ	b1346	Rac prophage; conserved protein	19	38	59	28	34	1.73529	0.429526	0.756909	0.548386	0.00155635	0.499604	0.353713	0.610527	1	1	0.11366	0.00155635
3412615	3412621	3412800	3413093	+	yhdU	b3263	putative membrane protein	17	20	41	21	28	1.46429	0.797872	0.749824	0.271698	0.00155635	0.499604	0.991566	0.403684	1	1	0.334765	0.00155635
1720968	1721025	1721261	1721263	+	ydhI	b1643	DUF1656 family putative inner membrane efflux pump associated protein	28	38	51	28	36	1.41667	0.785193	0.489405	0.791944	0.00155926	0.500554	0.386794	0.534556	1	1	0.115538	0.00155926
492048	492092	494023	494024	+	dnaX	b0470	DNA polymerase III/DNA elongation factor III, tau and gamma subunits	41	97	45	57	36	1.25	1	0.32186	0.075146	0.731903	0.476682	0.00156994	0.515353	1	1	0.206828	0.00156994
1103834	1103951	1104406	1104446	+	csgB	b1041	curlin nucleator protein, minor subunit in curli complex	29	19	60	28	41	1.46341	0.809118	0.482845	0.0777821	0.00157316	0.499604	0.576604	0.409595	1	1	0.730365	0.00157316
392957	394506	395129	395129	+	yaiV	b0375	putative transcriptional regulator	16	22	44	21	28	1.57143	0.604373	0.44332	0.473033	0.00157494	0.492121	0.512416	0.524749	1	1	0.272954	0.00157494
1257812	1257812	1256721	1256689	-	ychF	b1203	catalase inhibitor protein; ATPase, K+-dependent, ribosome-associated	109	161	65	80	61	1.06557	1	0.671431	0.0186386	0.80914	0.85808	0.00160844	0.744642	1	1	0.0574883	0.00160844
1122607	1122607	1121561	1121561	-	pyrC	b1062	dihydro-orotase	233	230	76	142	105	0.72381	1	0.255584	0.00162287	0.130819	0.592353	0.101061	0.725498	1	1	0.35287	0.00162287
951314			951650	+	-	predicted RNA	antisense: pflB	322	488	201	625	333	0.603604	0.865686	0.585149	0.0222338	0.00162381	0.441987	0.347013	0.400558	1	1	0.590412	0.00162381
1417837	1417763	1417488	1417387	-	racC	b1351	Rac prophage; uncharacterized protein	29	23	55	27	27	2.03704	0.160734	0.482845	0.182509	0.00162758	0.524537	0.725019	0.825307	1	1	0.466479	0.00162758
325371	325364	324696	324643	-	ykgH	b0310	putative inner membrane protein	16	24	44	21	29	1.51724	0.740789	0.447331	0.561189	0.00162758	0.490958	0.51245	0.464343	1	1	0.244611	0.00162758
435137	435137	435556	435556	+	nusB	b0416	transcription antitermination protein	217	330	109	147	127	0.858268	1	0.974148	0.00196741	0.782906	0.830883	0.00166973	0.87646	1	1	0.0087884	0.00166973
2987530	2987536	2988168	2988229	+	yqeH	b2846	putative LuxR family transcriptional regulator	21	25	50	24	23	2.17391	0.0624367	0.469851	0.494445	0.00167073	0.390522	0.345725	0.899203	1	1	0.288042	0.00167073
1822306	1822256	1821918	1821918	-	osmE	b1739	osmotically-inducible lipoprotein	123	164	119	385	151	0.788079	1	0.453421	0.334634	0.00169944	0.413047	0.394127	0.0115893	1	1	0.401718	0.00169944
81270			81436	+	-	predicted RNA	antisense: leuB	379	457	132	472	327	0.40367	0.502981	0.57898	0.00170266	0.0026046	0.458861	0.234528	0.636473	1	1	0.477008	0.00170266
3471348	3471329	3470145	3470112	-	tufA	b3339	translation elongation factor EF-Tu 1	4565	5879	824	2506	1334	0.617691	1	0.834134	0.0017029	0.7756	0.458446	0.729783	0.836638	1	1	0.887242	0.0017029
	4293543	4294139	4294398	+	nrfG	b4076	heme lyase (NrfEFG) for insertion of heme into c552, subunit NrfG	26	26	45	21	31	1.45161	0.82418	0.510108	0.685602	0.00179458	0.502177	0.499898	0.409377	1	1	0.195738	0.00179458
1288664	1288624	1287782	1287623	-	purU	b1232	formyltetrahydrofolate hydrolase	148	176	64	89	68	0.941176	1	0.722512	0.00681487	0.654849	0.511465	0.00185453	0.746867	1	1	0.0534564	0.00185453
121665	121551	120178	120126	-	aroP	b0112	aromatic amino acid transporter	230	274	85	177	113	0.752212	1	0.333235	0.00189126	0.105369	0.623466	0.225523	0.638748	1	1	0.670201	0.00189126
2248532	2248532	2247063	2247015	-	lysP	b2156	lysine transporter	262	335	91	122	113	0.80531	1	0.375546	0.00192423	0.538466	0.481732	0.139805	0.831908	1	1	0.0816112	0.00192423
497149	497175	497819	497891	+	adk	b0474	adenylate kinase	272	340	114	190	129	0.883721	1	0.518268	0.00192423	0.264309	0.601484	0.00437364	0.590592	1	1	0.209092	0.00192423
4213160	4213234	4213617	4214279	+	yjaA	b4011	stress-induced protein	14	23	45	22	24	1.875	0.28753	0.426715	0.33725	0.00192854	0.494756	0.451239	0.745679	1	1	0.27563	0.00192854
3796939	3796948	3798207	3798231	+	waaL	b3622	O-antigen ligase	46	57	44	31	22	2	0.28992	0.383573	0.337366	0.199481	0.614361	0.0019304	0.726115	1	1	0.0391624	0.0019304
1907435	1907435	1907226	1907226	-	cspC	b1823	stress protein, member of the CspA-family	1169	2403	650	1483	1093	0.594694	1	0.893006	0.00194566	0.134833	0.701617	0.997177	0.826824	1	1	0.97388	0.00194566
3099598	3099565	3098558	3095081	-	yggM	b2956	DUF1202 family putative secreted protein	30	34	65	28	40	1.625	0.773378	0.191555	0.736536	0.00195417	0.417513	0.510236	0.515098	1	1	0.259042	0.00195417
4406158	4406190	4406615	4406645	+	nsrR	b4178	nitric oxide-sensitive repressor for NO regulon	33	168	62	91	65	0.953846	1	0.491938	0.0279523	0.837631	0.487288	0.00196495	0.765461	1	1	0.0304603	0.00196495
669037	669036	668719	668716	-	rsfS	b0637	ribosomal silencing factor	163	239	88	130	93	0.946237	1	0.646747	0.0261264	0.82344	0.851859	0.00199553	0.762421	1	1	0.0324459	0.00199553
	4325165	4324377		-	phnC	b4106	phosphonate ABC transporter ATP-binding subunit	22	15	41	20	22	1.86364	0.367367	0.710323	0.188504	0.00200879	0.518175	0.866224	0.709098	1	1	0.465035	0.00200879
2563588	2563592	2563969	2563979	+	yffQ	b2448	CPZ-55 prophage; uncharacterized protein	48	33	99	46	56	1.76786	0.441095	0.723597	0.148769	0.0020554	0.504157	0.999679	0.641281	1	1	0.533739	0.0020554
293219	292948	292322	291996	-	yagK	b0277	CP4-6 prophage; conserved protein	20	28	46	22	22	2.09091	0.113913	0.47062	0.789467	0.00206071	0.502971	0.277279	0.841083	1	1	0.185658	0.00206071
	2303013	2302750		-	napD	b2207	assembly protein for periplasmic nitrate reductase	18	12	44	22	23	1.91304	0.270715	0.462681	0.00871795	0.0020628	0.500697	0.622976	0.775641	1	1	0.893457	0.0020628
3347115	3347115	3347969		+	yhbJ	b3205	adaptor protein RapZ for GlmZ/GlmY sRNA decay; glucosamine-6-phosphate regulated; NTPase	115	191	64	135	81	0.790123	1	0.76938	0.00208097	0.0923544	0.721973	0.0102393	0.441025	1	1	0.334795	0.00208097
313278	313242	313141	313098	-	ykgR	b4671	uncharacterized protein	32	41	63	34	32	1.96875	0.139514	0.732047	0.45341	0.00208282	0.481776	0.234875	0.852047	1	1	0.132587	0.00208282
3720701	3720600	3720448	3720298	-	hokA	b4455	toxic polypeptide, small	28	48	39	25	21	1.85714	0.28753	0.539297	0.445182	0.0230519	0.899312	0.00711573	0.97584	1	1	0.00209418	0.00209418
2657083	2657083	2656748	2656737	-	fdx	b2525	[2Fe-2S] ferredoxin	170	233	90	134	91	0.989011	1	0.696808	0.0359149	0.771772	0.789295	0.00210997	0.677242	1	1	0.0626498	0.00210997
4479669	4479730	4480926	4480965	+	yjgN	b4257	DUF898 family inner membrane protein	31	33	66	28	37	1.78378	0.553847	0.138	0.590309	0.00212382	0.413136	0.505975	0.59902	1	1	0.306335	0.00212382
896048			895951	-	-	predicted RNA	antisense: potG	164	69	206	189	295	0.698305	1	0.545957	0.0726398	0.303478	0.496939	0.00213483	0.316654	1	1	0.355236	0.00213483
3867008	3866897	3866469	3866453	-	ibpB	b3686	heat shock chaperone	24	26	41	20	22	1.86364	0.294836	0.495196	0.662672	0.00214921	0.538815	0.316449	0.744642	1	1	0.14422	0.00214921
2629792	2629792	2630310	2630310	+	yfgH	b2505	outer membrane integrity lipoprotein	20	21	38	19	34	1.11765	1	0.483512	0.432081	0.00217902	0.494556	0.979233	0.0810915	1	1	0.242937	0.00217902
2283976	2284129	2284356	2284375	+	yejL	b2187	UPF0352 family protein	133	219	87	140	88	0.988636	1	0.764322	0.0768864	0.75882	0.830195	0.00225471	0.577992	1	1	0.103671	0.00225471
523261	523261	527541	527580	+	rhsD	b0497	Rhs family putative polymorphic toxin	23	22	56	29	30	1.86667	0.840765	0.00227377	0.13584	0.124139	0.397177	0.756922	0.88567	1	1	0.894361	0.00227377
715199	715412	715906	716078	+	ybfP	b0689	lipoprotein	26	29	50	24	33	1.51515	0.645563	0.490499	0.683899	0.00229178	0.500697	0.457995	0.517028	1	1	0.196444	0.00229178
1734222	1734101	1733754	1733605	-	grxD	b1654	glutaredoxin-4	222	269	106	175	107	0.990654	1	0.978115	0.0258396	0.490528	0.532833	0.00231464	0.524757	1	1	0.157712	0.00231464
985733	985709	984519	984429	-	aspC	b0928	aspartate aminotransferase, PLP-dependent	287	404	112	248	171	0.654971	1	0.416856	0.00231597	0.140565	0.515598	0.546377	0.82263	1	1	0.888207	0.00231597
3318289			3318213	-	metY	b3171	Met tRNA	167	607	168	532	270	0.622222	1	0.572835	0.00231597	0.0308407	0.497212	0.00930956	0.279283	1	1	0.3129	0.00231597
223771			225312	+	rrsH	b0201	16S ribosomal RNA of rrnH operon	8116	2638	1215	1340	9024	0.134641	1	0.886697	0.773486	0.587081	0.455843	0.95541	0.00242319	1	1	0.77174	0.00242319
225307			223788	-	-	predicted RNA	antisense: rrsH	8063	2631	1173	1348	9085	0.129114	1	0.887126	0.777845	0.583069	0.459034	0.995775	0.00242319	1	1	0.761975	0.00242319
2731157			2729616	-	rrsG	b2591	16S ribosomal RNA of rrnG operon	9688	3171	1406	1579	10685	0.131586	1	0.887126	0.773618	0.586357	0.394993	0.842648	0.00242319	1	1	0.781136	0.00242319
3428762			3427221	-	rrsD	b3278	16S ribosomal RNA of rrnD operon	9851	3230	1431	1602	10855	0.131829	1	0.887126	0.773486	0.587081	0.390522	0.843616	0.00243329	1	1	0.778836	0.00243329
3427226			3428740	+	-	predicted RNA	antisense: rrsD	9759	3200	1390	1604	10820	0.128466	1	0.887464	0.776347	0.583069	0.39998	0.842104	0.00243329	1	1	0.774307	0.00243329
729116	729134	729340	729343	+	ybfA	b0699	DUF2517 family protein	21	35	47	28	26	1.80769	0.386291	0.47777	0.736131	0.00245947	0.502177	0.253099	0.839881	1	1	0.13519	0.00245947
343934	344176	344991	345018	+	yahL	b0326	uncharacterized protein	15	18	42	20	21	2	0.204102	0.453007	0.343652	0.00246955	0.499604	0.479866	0.814849	1	1	0.371837	0.00246955
2597706	2597618	2596905	2596905	-	purC	b2476	phosphoribosylaminoimidazole-succinocarboxamide synthetase	337	432	142	271	169	0.840237	1	0.41171	0.00248719	0.115534	0.931138	0.0476654	0.515098	1	1	0.430283	0.00248719
3943344			3941830	-	-	predicted RNA	antisense: rrsC	10062	3284	1423	1646	11152	0.1276	1	0.887522	0.776254	0.583129	0.390522	0.843694	0.00252116	1	1	0.762832	0.00252116
	2703386	2702481	2702470	-	era	b2566	membrane-associated, 16S rRNA-binding GTPase	117	206	72	126	78	0.923077	1	0.613777	0.00312627	0.21907	0.792141	0.00252323	0.485385	1	1	0.246342	0.00252323
151002	150953	149715	149619	-	yadC	b0135	putative fimbrial-like adhesin protein	31	28	63	27	44	1.43182	1	0.160083	0.481983	0.00253787	0.390522	0.85068	0.344053	1	1	0.371305	0.00253787
679408	679406	678852	678595	-	ybeT	b0647	Sel1 family TPR-like repeat protein	19	19	56	27	40	1.4	0.946927	0.43617	0.134468	0.00254471	0.476682	0.665102	0.371938	1	1	0.622643	0.00254471
3941808			3943349	+	rrsC	b3756	16S ribosomal RNA of rrnC operon	10152	3317	1460	1647	11197	0.130392	1	0.887126	0.773618	0.587081	0.390522	0.843874	0.00259917	1	1	0.76356	0.00259917
532451	532451	532933	533010	+	allA	b0505	ureidoglycolate lyase, releasing urea	46	31	89	41	71	1.25352	1	0.68076	0.199267	0.0026154	0.504157	0.618174	0.178875	1	1	0.461067	0.0026154
1070955	1070955	1070365	1070365	-	rutE	b1008	putative malonic semialdehyde reductase	81	20	96	86	94	1.02128	1	0.33731	0.00261992	0.561639	0.410826	0.00586692	0.837406	1	1	0.0305958	0.00261992
1222996	1223264	1223449	1224154	+	ymgJ	b4594	uncharacterized protein	20	20	50	26	32	1.5625	0.645563	0.743904	0.151117	0.0026204	0.500697	0.846369	0.527223	1	1	0.60211	0.0026204
228647			225778	-	-	predicted RNA	antisense: rrlH	6121	1981	884	941	6523	0.13552	1	0.886814	0.770604	0.598325	0.863957	0.843874	0.00263023	1	1	0.778111	0.00263023
933020			932853	-	-	predicted RNA	antisense: lrp	529	549	169	474	323	0.52322	1	0.453007	0.00263037	0.0305573	0.899312	0.104648	0.618603	1	1	0.406642	0.00263037
2114330	2114327	2113434	2113434	-	wcaN	b2042	putative regulatory subunit for GalU	192	247	85	163	105	0.809524	1	0.608678	0.00273545	0.115608	0.970319	0.0279602	0.524749	1	1	0.372448	0.00273545
	4640306	4639590	4639559	-	arcA	b4401	response regulator in two-component regulatory system with ArcB or CpxA	255	251	141	445	199	0.708543	1	0.942172	0.190925	0.00277291	0.506371	0.511946	0.41381	1	1	0.430283	0.00277291
3401104	3401087	3400044	3400044	-	mreB	b3251	cell wall structural complex MreBCD, actin-like component MreB	224	290	96	203	126	0.761905	1	0.453589	0.00279772	0.0803186	0.635195	0.128834	0.527532	1	1	0.529989	0.00279772
4525868	4525803	4525015	4525015	-	yjhI	b4299	putative DNA-binding transcriptional regulator	44	40	79	35	42	1.88095	0.388999	0.228019	0.691069	0.00280343	0.461768	0.454359	0.719711	1	1	0.29554	0.00280343
2632535	2632535	2630958	2630925	-	guaA	b2507	GMP synthetase (glutamine aminotransferase)	312	379	94	175	124	0.758065	1	0.394948	0.00285312	0.301787	0.474298	0.238572	0.826824	1	1	0.400387	0.00285312
1425313	1425377	1425640	1426434	+	ynaK	b1365	Rac prophage; conserved protein	36	29	77	38	48	1.60417	0.45528	0.472821	0.15487	0.00288114	0.498601	0.95541	0.618603	1	1	0.590143	0.00288114
4035531			4037072	+	rrsA	b3851	16S ribosomal RNA of rrnA operon	10087	3310	1463	1646	11101	0.13179	1	0.887126	0.772892	0.587081	0.390522	0.843694	0.0029227	1	1	0.761986	0.0029227
2013156	2013229	2014887		+	fliF	b1938	flagellar basal-body MS-ring and collar protein	153	354	89	112	91	0.978022	1	0.808157	0.00293224	0.73426	0.970043	0.00431969	0.842363	0.373715	1	0.0307409	0.00293224
3321613	3321613	3319988	3318290	-	yhbX	b3173	putative EptAB family phosphoethanolamine transferase, inner membrane protein	18	25	48	21	33	1.45455	1	0.112074	0.700839	0.0029376	0.390522	0.553239	0.409377	1	1	0.272788	0.0029376
2352376	2352374	2351016	2351016	-	glpT	b2240	sn-glycerol-3-phosphate transporter	87	144	84	198	65	1.29231	1	0.367347	0.229698	0.0518727	0.500433	0.0367789	0.00304581	1	1	0.54914	0.00304581
1418838	1418229	1418008		-	kilR	b1352	Rac prophage; inhibitor of ftsZ, killing protein	33	25	68	35	49	1.38776	0.785885	0.477505	0.102968	0.00309982	0.497443	0.620008	0.440309	1	1	0.735556	0.00309982
3411568	3411653	3412537	3412608	+	yhdJ	b3262	DNA adenine methyltransferase, SAM-dependent	29	33	64	28	50	1.28	1	0.350009	0.73244	0.00310519	0.858164	0.726359	0.194503	1	1	0.288049	0.00310519
3736455			3736485	+	-	predicted RNA	antisense: bax	227	316	135	434	198	0.681818	1	0.74242	0.0331495	0.00310519	0.558763	0.14656	0.20263	1	1	0.586845	0.00310519
3036282	3036282	3035184	3035183	-	prfB	b2891	peptide chain release factor RF-2	224	310	101	165	113	0.893805	1	0.497572	0.00311079	0.208391	0.958315	0.029792	0.586941	1	1	0.344827	0.00311079
2380745			2381016	+	-	predicted RNA	antisense: elaB	168	154	249	742	409	0.608802	0.91168	0.268683	0.975635	0.00311893	0.0290185	0.264845	0.416047	1	0.382975	0.00665303	0.00311893
4639778			4639952	+	-	predicted RNA	antisense: arcA	258	271	138	480	201	0.686567	1	0.646475	0.206464	0.00312919	0.647775	0.263598	0.0353012	1	1	0.938521	0.00312919
2203912	2203972	2204289	2204340	+	yehK	b4541	uncharacterized protein	13	13	37	19	23	1.6087	0.532185	0.751355	0.0830115	0.00317483	0.499604	0.77334	0.613208	1	1	0.778836	0.00317483
607793	607836	607988	608055	+	hokE	b4415	toxic polypeptide, small	33	33	65	34	53	1.22642	1	0.482845	0.268862	0.00319678	0.497443	0.846621	0.241625	1	1	0.383479	0.00319678
4209683			4208164	-	-	predicted RNA	antisense: rrsE	10527	3424	1490	1719	11659	0.127798	1	0.887402	0.775182	0.585365	0.390522	0.843874	0.00319793	1	1	0.745098	0.00319793
2744197			2746237	+	-	predicted RNA	antisense: rpsP rplS rimM trmD	1289	2031	225	763	333	0.675676	1	0.864574	0.00320233	0.804427	0.443227	0.161574	0.845163	1	1	0.835571	0.00320233
3423794			3426764	+	-	predicted RNA	antisense: rrlD	5646	1771	892	892	6070	0.146952	1	0.882606	0.756618	0.606553	0.447304	0.843874	0.00322014	1	1	0.738968	0.00322014
3943704			3946607	+	rrlC	b3758	23S ribosomal RNA of rrnC operon	5670	1835	887	895	6044	0.146757	1	0.882934	0.7625	0.605123	0.424883	0.843874	0.00322014	1	1	0.770239	0.00322014
4208147			4209688	+	rrsE	b4007	16S ribosomal RNA of rrnE operon	10584	3452	1528	1719	11681	0.130811	1	0.886814	0.772878	0.588632	0.408627	0.843874	0.00322924	1	1	0.745098	0.00322924
4166659			4168200	+	rrsB	b3968	16S ribosomal RNA of rrnB operon	10586	3451	1528	1720	11683	0.130788	1	0.887126	0.772878	0.588632	0.408627	0.843874	0.00322924	1	1	0.745098	0.00322924
2729621			2731413	+	-	predicted RNA	antisense: rrsG	8193	2753	1170	1367	9050	0.129282	1	0.887522	0.778624	0.581761	0.403167	0.841027	0.00322924	1	1	0.781136	0.00322924
3219491	3219494	3220873	3221250	+	patA	b3073	putrescine:2-oxoglutaric acid aminotransferase, PLP-dependent	61	63	102	235	178	0.573034	1	0.175053	0.371335	0.147353	0.00323919	0.0971897	0.826824	1	1	0.0108077	0.00323919
2444169	2444169	2443891	2443759	-	yfcL	b2325	uncharacterized protein	99	160	76	75	66	1.15152	1	0.691127	0.175388	0.430528	0.48877	0.00356357	0.975088	1	1	0.00327192	0.00327192
3486041	3486120	3486752	3486754	+	crp	b3357	cAMP-activated global transcription factor, mediator of catabolite repression	414	412	141	392	218	0.646789	0.905409	0.274205	0.00328147	0.00904124	0.67528	0.295482	0.515098	1	1	0.846929	0.00328147
1648499	1648508	1648663	1648664	+	ydfA	b1571	Qin prophage; uncharacterized protein	33	39	66	34	46	1.43478	0.752839	0.482845	0.381646	0.00329164	0.499604	0.704128	0.483432	1	1	0.210552	0.00329164
787661	787595	786843	785701	-	gpmA	b0755	phosphoglyceromutase 1	441	620	177	448	302	0.586093	1	0.425198	0.00331348	0.0800939	0.633773	0.914408	0.826824	1	1	0.735556	0.00331348
2758985	2758985	2760394	2760394	+	yfjI	b2625	CP4-57 prophage; uncharacterized protein	31	25	56	25	33	1.69697	0.656162	0.203681	0.509747	0.003352	0.443227	0.547088	0.586941	1	1	0.369808	0.003352
	572466	572921		+	ybcN	b0547	DLP12 prophage; uncharacterized protein	36	34	72	35	50	1.44	0.938112	0.727489	0.271698	0.003352	0.500697	0.797079	0.427756	1	1	0.351779	0.003352
3215598			3215673	+	ileX	b3069	Ile tRNA	43	41	47	35	43	1.09302	1	0.54313	0.803166	0.00338805	0.533925	0.531566	0.0770507	1	1	0.0085829	0.00338805
2381027	2381027	2380722	2380722	-	elaB	b2266	DUF883 family protein, putative membrane-anchored ribosome-binding protein	167	160	239	705	391	0.611253	0.865686	0.259397	0.924784	0.00340994	0.0236582	0.298234	0.441025	1	0.271275	0.0153122	0.00340994
1879588	1879585	1879403	1879278	-	yoaG	b1796	uncharacterized protein	31	25	65	33	51	1.27451	0.946927	0.474246	0.130601	0.00340994	0.494756	0.54065	0.292908	1	1	0.678205	0.00340994
852775			852941	+	-	predicted RNA	antisense: mntS	84	409	193	632	331	0.583082	1	0.472856	0.124606	0.00340994	0.444993	0.310592	0.236063	1	1	0.932195	0.00340994
406968	406979	407170	407170	+	yaiA	b0389	OxyR-regulated conserved protein	147	383	137	325	155	0.883871	1	0.937004	0.0222743	0.130838	0.504538	0.00341417	0.168633	0.349288	1	0.33852	0.00341417
4021945	4021945	4022214	4022214	+	tatA	b3836	TatABCE protein translocation system subunit	210	306	103	214	125	0.824	1	0.839686	0.00983058	0.250657	0.957128	0.00355794	0.483432	1	1	0.202192	0.00355794
1287622			1287538	-	tyrT	b1231	Tyr tRNA	211	241	89	122	111	0.801802	1	0.756572	0.0730169	0.798805	0.501807	0.0136868	0.932546	1	1	0.00355829	0.00355829
1002878	1002889	1003431	1003431	+	ycbU	b0942	putative fimbriae protein	18	20	51	26	44	1.15909	1	0.438979	0.232585	0.00356354	0.470089	0.611282	0.125956	1	1	0.444054	0.00356354
1901946	1902048	1903019	1903038	+	manX	b1817	fused mannose-specific PTS enzymes: IIA component/IIB component	202	299	102	257	111	0.918919	1	0.782079	0.00360567	0.025201	0.865668	0.0206186	0.190128	1	1	0.938057	0.00360567
2098301	2098301	2097321	2089975	-	wzzB	b2027	regulator of length of O-antigen component of lipopolysaccharide chains	194	276	95	192	98	0.969388	1	0.72221	0.00363954	0.0846585	0.758046	0.00408806	0.246694	1	1	0.461067	0.00363954
3821427	3821428	3822051	3822051	+	gmk	b3648	guanylate kinase	119	194	66	141	90	0.733333	1	0.741188	0.00369658	0.122607	0.593097	0.0181283	0.527532	1	1	0.302687	0.00369658
4322476	4322422	4321697		-	phnF	b4102	putative DNA-binding transcriptional regulator of phosphonate uptake and biodegradation	15	16	39	19	21	1.85714	0.306903	0.451546	0.28134	0.00375999	0.498601	0.589774	0.776407	1	1	0.406642	0.00375999
3785015	3785015	3784584	3784443	-	yibN	b3611	putative rhodanese-related sulfurtransferase	191	222	79	145	91	0.868132	1	0.741573	0.0116774	0.36197	0.501111	0.00376844	0.547537	1	1	0.167008	0.00376844
4313800	4313868	4314197	4314584	+	yjdP	b4487	putative periplasmic protein	13	26	46	24	23	2	0.0601724	0.782197	0.407067	0.00381421	0.498601	0.347242	0.842363	1	1	0.242612	0.00381421
4352908	4352908	4353081	4353175	+	yjdO	b4559	uncharacterized protein	42	43	66	34	43	1.53488	0.661969	0.509876	0.527164	0.00381421	0.504157	0.444022	0.534556	1	1	0.147989	0.00381421
4161098	4161124	4161771		+	fabR	b3963	transcriptional repressor of fabA and fabB	86	156	61	120	64	0.953125	1	0.489436	0.0216431	0.208662	0.632064	0.00390613	0.300065	1	1	0.333178	0.00390613
	3342836	3343411		+	lptC	b3199	lipopolysaccharide export, IM-tethered periplasmic protein of the LptBFGC export complex	93	161	56	101	66	0.848485	1	0.539687	0.0102055	0.413363	0.720798	0.00399576	0.614377	1	1	0.126818	0.00399576
2562111	2562111	2562527		+	yffO	b2446	CPZ-55 prophage; uncharacterized protein	28	19	56	28	37	1.51351	0.661969	0.482845	0.117386	0.0040154	0.499604	0.762746	0.538759	1	1	0.723196	0.0040154
225759			228662	+	rrlH	b0204	23S ribosomal RNA of rrnH operon	6150	2016	915	955	6497	0.140834	1	0.88616	0.768869	0.602336	0.899074	0.843694	0.00403607	1	1	0.769075	0.00403607
737536	738092	738853	738994	+	ybfD	b0706	H repeat-associated putative transposase	29	21	69	32	33	2.09091	0.22616	0.631137	0.10849	0.00408721	0.516493	0.912743	0.828895	1	1	0.691436	0.00408721
	4577958	4576912	4576905	-	mcrC	b4345	5-methylcytosine-specific restriction enzyme McrBC, subunit McrC	26	36	55	25	26	2.11538	0.173754	0.280769	0.92003	0.00408893	0.540331	0.250663	0.845163	1	1	0.163204	0.00408893
1988699	1988716	1989213	1989282	+	ftnA	b1905	ferritin iron storage protein (cytoplasmic)	70	96	55	45	41	1.34146	0.96348	0.530109	0.268776	0.230458	0.815112	0.00599504	0.992537	1	1	0.00411361	0.00411361
4152963			4153096	+	-	predicted RNA	antisense: ppc	557	548	168	344	324	0.518519	1	0.42684	0.00418254	0.322259	0.926452	0.118225	0.977828	1	1	0.111089	0.00418254
3703848	3703848	3702865		-	dppD	b3541	dipeptide/heme transporter	103	117	57	69	48	1.1875	1	0.808617	0.0818115	0.884532	0.509211	0.00419397	0.651333	1	1	0.116771	0.00419397
3426783			3423880	-	rrlD	b3275	23S ribosomal RNA of rrnD operon	5837	1850	941	930	6251	0.150536	1	0.880375	0.755481	0.608919	0.470469	0.843874	0.00425216	1	1	0.737348	0.00425216
	494405	495010	495010	+	recR	b0472	gap repair protein	132	167	73	110	69	1.05797	1	0.781196	0.0470214	0.579681	0.644044	0.00428079	0.535696	1	1	0.186328	0.00428079
	573730	573870	573870	+	ylcG	b4509	uncharacterized protein, DLP12 prophage	38	33	79	42	56	1.41071	0.790686	0.474858	0.158766	0.00429861	0.498601	0.769246	0.485385	1	1	0.628917	0.00429861
1553853	1553838	1552828	1552828	-	adhP	b1478	ethanol-active dehydrogenase/acetaldehyde-active reductase	65	57	119	163	154	0.772727	1	0.0898368	0.368937	0.461055	0.00431313	0.229382	0.893056	1	1	0.208623	0.00431313
4037067			4035254	-	-	predicted RNA	antisense: rrsA	8444	2888	1210	1413	9303	0.130066	1	0.887126	0.779473	0.583069	0.390522	0.842104	0.00431745	1	1	0.774307	0.00431745
3957927	3957970	3959445	3960239	+	ilvC	b3774	ketol-acid reductoisomerase, NAD(P)-binding	1251	932	172	360	227	0.757709	1	0.18701	0.00432813	0.903932	0.851859	0.277279	0.828895	1	1	0.743686	0.00432813
2760261	2758600	2757644	2757578	-	yfjH	b2623	CP4-57 prophage; uncharacterized protein	21	29	50	23	26	1.92308	0.333581	0.710313	0.90293	0.00435773	0.508654	0.379006	0.783611	1	1	0.24125	0.00435773
2800146	2800146	2800475	2800490	+	ygaM	b2672	DUF883 family protein, putative membrane-anchored ribosome-binding protein	71	71	116	357	179	0.648045	1	0.657839	0.970611	0.00435773	0.885981	0.521916	0.168633	1	1	0.00479797	0.00435773
2903625	2900273	2899488	2899488	-	ygcW	b2774	putative dehydrogenase	30	31	59	28	47	1.25532	1	0.869107	0.708771	0.00435773	0.680345	0.725019	0.236063	1	1	0.304649	0.00435773
1304743	1304754	1305767		+	oppD	b1246	oligopeptide transporter subunit	242	305	103	233	121	0.85124	1	0.423552	0.0043799	0.0607881	0.925019	0.054235	0.413673	1	1	0.867648	0.0043799
4171541			4168660	-	-	predicted RNA	antisense: rrlB	7009	2231	1047	1083	7472	0.140123	1	0.88656	0.764816	0.605781	0.539334	0.843874	0.00437993	1	1	0.737781	0.00437993
4212937			4210062	-	-	predicted RNA	antisense: rrlE	7229	2301	1070	1115	7714	0.138709	1	0.886814	0.765475	0.605123	0.54671	0.843874	0.00437993	1	1	0.737779	0.00437993
3346468	3346578	3347069	3347076	+	ptsN	b3204	sugar-specific enzyme IIA component of PTS	160	207	68	156	97	0.701031	1	0.800451	0.00442348	0.113071	0.93072	0.0212679	0.524757	1	1	0.312304	0.00442348
3413542	3413465	3412803	3412702	-	acrS	b3264	acrAB operon transcriptional repressor	22	20	47	24	39	1.20513	1	0.482845	0.304477	0.00448401	0.494862	0.83556	0.192265	1	1	0.400387	0.00448401
4205942	4205931	4204642	4204636	-	purD	b4005	phosphoribosylglycinamide synthetase phosphoribosylamine-glycine ligase	143	183	65	99	69	0.942029	1	0.596692	0.00458981	0.356726	0.644826	0.00623242	0.63168	1	1	0.203356	0.00458981
988985	988985	987585	987489	-	asnS	b0930	asparaginyl tRNA synthetase	302	410	106	228	128	0.828125	1	0.789152	0.00462126	0.22028	0.476682	0.144055	0.776407	1	1	0.849397	0.00462126
1821709	1821619	1821299	1821265	-	chbB	b1738	N,N'-diacetylchitobiose-specific enzyme IIB component of PTS	20	32	69	35	36	1.91667	0.177298	0.410712	0.315764	0.00462994	0.483527	0.443125	0.844371	1	1	0.367476	0.00462994
1218852	1218983	1219201	1220309	+	ymgF	b4520	inner membrane division septum protein	19	26	53	28	36	1.47222	0.740789	0.749824	0.275577	0.00466759	0.499604	0.95291	0.524749	1	1	0.396261	0.00466759
4579835			4579911	+	symR	b4625	-	51	32	69	42	47	1.46809	0.772084	0.536317	0.21473	0.00467256	0.548298	0.946963	0.56683	1	1	0.547406	0.00467256
191709	191855	192580	192637	+	pyrH	b0171	uridylate kinase	177	216	77	94	89	0.865169	1	0.723377	0.00473255	0.884532	0.674735	0.00525906	0.97005	1	1	0.00997818	0.00473255
4168195			4166382	-	-	predicted RNA	antisense: rrsB	8874	3006	1261	1473	9786	0.128858	1	0.887402	0.778865	0.584191	0.390522	0.843874	0.004753	1	1	0.753576	0.004753
4037519			4040423	+	rrlA	b3854	23S ribosomal RNA of rrnA operon	6658	2143	988	1027	7007	0.141002	1	0.886814	0.766587	0.604843	0.522136	0.843874	0.00478556	1	1	0.745812	0.00478556
1556612	1556625	1557056	1557067	+	osmC	b1482	lipoyl-dependent Cys-based peroxidase, hydroperoxide resistance; salt-shock inducible membrane protein; peroxiredoxin	222	149	285	667	414	0.688406	1	0.263974	0.407529	0.0815166	0.264814	0.185852	0.826702	1	1	0.00482184	0.00482184
406371	406405	406929	406967	+	aroL	b0388	shikimate kinase II	196	390	145	301	151	0.960265	1	0.451718	0.00799578	0.0732182	0.502177	0.00482572	0.178875	1	1	0.443964	0.00482572
1420365	1420365	1420661	1420683	+	ydaS	b1357	Rac prophage; putative DNA-binding transcriptional regulator	18	21	39	20	24	1.625	0.506521	0.474858	0.323008	0.00483462	0.500554	0.646601	0.663948	1	1	0.311602	0.00483462
1477500	1477621	1478226		+	ynbA	b1408	inner membrane protein	30	30	62	30	56	1.10714	1	0.720276	0.518842	0.00489468	0.498601	0.938081	0.0868393	1	1	0.358143	0.00489468
2726195			2729165	+	-	predicted RNA	antisense: rrlG	6811	2167	1029	1061	7261	0.141716	1	0.886364	0.763869	0.605977	0.539958	0.843874	0.00508656	1	1	0.734149	0.00508656
612927			612797	-	-	predicted RNA	antisense: fes	194	77	205	210	336	0.610119	1	0.575562	0.180336	0.559338	0.98865	0.00521949	0.345229	1	1	0.406642	0.00521949
1987990	1987959	1987873	1987873	-	azuC	b4663	acid-inducible small membrane-associated protein	34	107	51	58	52	0.980769	1	0.509876	0.0821242	0.703403	0.499604	0.032614	0.884172	1	1	0.00525027	0.00525027
1570644	1570489	1568954	1568954	-	gadC	b1492	glutamate:gamma-aminobutyric acid antiporter	55	46	114	118	157	0.726115	1	0.0415888	0.22445	0.587081	0.00525296	0.0507788	0.691482	1	1	0.232773	0.00525296
648035	648035	647484		-	citX	b0614	apo-citrate lyase phosphoribosyl-dephospho-CoA transferase	27	23	55	28	45	1.22222	1	0.487609	0.295277	0.00534179	0.498601	0.843616	0.241071	1	1	0.411579	0.00534179
4079739	4079751	4079969	4079969	+	yiiF	b3890	putative thymol sensitivity protein, CopG family putative transcriptional regulator	33	36	59	31	34	1.73529	0.428265	0.491364	0.481983	0.00540047	0.504157	0.382233	0.728626	1	1	0.203356	0.00540047
2233600	2233600	2233839	2233839	+	yeiS	b2145	DUF2542 family protein	17	28	59	31	25	2.36	0.0514035	0.764076	0.276451	0.00544418	0.502101	0.35417	0.918417	1	1	0.406642	0.00544418
1149728	1149728	1150657	1150669	+	fabD	b1092	malonyl-CoA-[acyl-carrier-protein] transacylase	209	257	91	166	111	0.81982	1	0.530552	0.00545181	0.143555	0.963031	0.0576025	0.578054	1	1	0.388893	0.00545181
1755143	1755141	1754932	1754931	-	ydhZ	b1675	uncharacterized protein	21	42	66	35	40	1.65	0.532185	0.79611	0.550545	0.00548404	0.489637	0.390881	0.664893	1	1	0.184323	0.00548404
1958438	1958132	1957032	1957008	-	torY	b1873	TMAO reductase III (TorYZ), cytochrome c-type subunit	17	16	52	24	40	1.3	1	0.788804	0.141893	0.00551052	0.490958	0.508814	0.272011	1	1	0.626736	0.00551052
919333	919120	918128	917501	-	ybjX	b0877	DUF535 family protein	200	217	78	187	92	0.847826	1	0.404872	0.00551208	0.0296047	0.538221	0.023943	0.189414	1	1	0.535401	0.00551208
3359647			3358790	-	-	predicted RNA	antisense: gltD gltB	587	758	187	383	324	0.57716	1	0.836067	0.00551208	0.284336	0.477436	0.827885	0.776407	1	1	0.720912	0.00551208
4376536	4376553	4376699	4376699	+	ecnB	b4411	entericidin B membrane lipoprotein	57	128	166	556	278	0.597122	1	0.43617	0.610329	0.00555763	0.425981	0.750536	0.20738	1	1	0.0344401	0.00555763
2679463	2679367	2678384	2678362	-	yphF	b2548	putative ABC superfamily sugar transporter periplasmic-binding protein	24	22	54	25	39	1.38462	1	0.506428	0.362892	0.00557924	0.679058	0.9831	0.41381	1	1	0.426264	0.00557924
1201075	1201032	1200787		-	xisE	b1141	e14 prophage; putative excisionase	17	30	51	27	32	1.59375	0.604373	0.755909	0.416227	0.00563975	0.498601	0.50757	0.621547	1	1	0.23503	0.00563975
1856932	1856928	1855981	1855981	-	ydjH	b1772	putative kinase	27	28	69	32	45	1.53333	0.888193	0.283564	0.379323	0.00566834	0.811512	0.830113	0.529704	1	1	0.426415	0.00566834
1645118	1644902	1644651	1644651	-	rem	b1561	Qin prophage; uncharacterized protein	50	47	107	56	69	1.55072	0.627648	0.477505	0.291498	0.00567292	0.499604	0.837236	0.614377	1	1	0.410152	0.00567292
	1200806	1199679	1199294	-	intE	b1140	e14 prophage; putative integrase	19	32	59	27	34	1.73529	0.553847	0.35488	0.763601	0.00567682	0.501111	0.469256	0.687315	1	1	0.297903	0.00567682
	3225722	3226171	3226233	+	ebgC	b3077	evolved beta-D-galactosidase, beta subunit; cupin superfamily	26	22	39	21	29	1.34483	0.809118	0.514693	0.467984	0.00567682	0.502928	0.645014	0.478354	1	1	0.252014	0.00567682
4051242			4051051	-	-	predicted RNA	antisense: csrC	575	1600	660	1788	1484	0.444744	0.565942	0.30048	0.0863456	0.0393981	0.00568567	0.676867	0.776407	1	0.954752	0.708082	0.00568567
3441029	3441029	3440040	3440036	-	rpoA	b3295	RNA polymerase, alpha subunit	2370	3373	420	1339	674	0.623145	1	0.86021	0.00591844	0.791591	0.446115	0.443121	0.838491	1	1	0.99955	0.00591844
2771616	2773318	2775021	2775021	+	yfjW	b2642	CP4-57 prophage; putative inner membrane protein	12	26	36	17	15	2.4	0.0526081	0.62797	0.708771	0.00603877	0.510402	0.0921828	0.974421	1	1	0.0977306	0.00603877
81806			82050	+	-	predicted RNA	antisense: leuA leuB	357	456	160	480	336	0.47619	0.620934	0.836067	0.00643029	0.00611659	0.472348	0.306282	0.627269	1	1	0.785541	0.00611659
4002800	4002799	4002419	4002419	-	yigF	b3817	putative inner membrane protein	18	22	31	16	16	1.9375	0.248473	0.501234	0.677663	0.00615925	0.574163	0.244797	0.839971	1	1	0.133175	0.00615925
1819452	1819447	1818605	1818552	-	chbR	b1735	repressor of chb operon for N,N'-diacetylchitobiose utilization	31	25	66	31	49	1.34694	1	0.340548	0.327328	0.00615925	0.708219	0.917639	0.355117	1	1	0.439382	0.00615925
1230224	1230767	1231186		+	umuD	b1183	DNA polymerase V, subunit D	19	25	55	29	46	1.19565	1	0.436775	0.305916	0.00615925	0.470448	0.880006	0.260083	1	1	0.394565	0.00615925
4210043			4212946	+	rrlE	b4009	23S ribosomal RNA of rrnE operon	7299	2342	1106	1136	7706	0.143525	1	0.886814	0.764193	0.606489	0.548383	0.843874	0.00616834	1	1	0.737024	0.00616834
1509070	1509064	1508834	1508254	-	yncJ	b1436	uncharacterized protein	45	45	92	48	55	1.67273	0.392438	0.478655	0.341744	0.00620351	0.499604	0.519879	0.750613	1	1	0.35287	0.00620351
2993624	2993638	2993856	2993942	+	ygeI	b2853	uncharacterized protein	17	29	41	23	23	1.78261	0.441095	0.740057	0.601454	0.00621234	0.504157	0.30073	0.755359	1	1	0.115436	0.00621234
4086926	4087002	4088057	4091057	+	yiiG	b3896	DUF3829 family lipoprotein	38	36	62	29	48	1.29167	1	0.255509	0.911522	0.00621234	0.410649	0.556986	0.293577	1	1	0.242496	0.00621234
4168641			4171544	+	rrlB	b3970	23S ribosomal RNA of rrnB operon	7071	2273	1082	1106	7482	0.144614	1	0.886364	0.763735	0.606824	0.542506	0.843874	0.00622252	1	1	0.736075	0.00622252
2850449	2850435	2849974	2849926	-	hycA	b2725	regulator of the transcriptional regulator FhlA	34	20	55	29	32	1.71875	0.404654	0.517155	0.156546	0.00623293	0.611697	0.9831	0.756239	1	1	0.678693	0.00623293
762968	763014	764180		+	sucC	b0728	succinyl-CoA synthetase, beta subunit	553	741	164	305	215	0.762791	1	0.79384	0.00628763	0.515519	0.474791	0.293586	0.826824	1	1	0.406642	0.00628763
1819855	1819805	1819455	1819453	-	chbA	b1736	N,N'-diacetylchitobiose-specific enzyme IIA component of PTS	30	31	64	33	52	1.23077	1	0.472856	0.338055	0.00635075	0.492121	0.977788	0.294371	1	1	0.361685	0.00635075
4337958	4337929	4337168	4337032	-	adiY	b4116	adi system transcriptional activator	41	40	74	35	41	1.80488	0.485382	0.246424	0.789581	0.00635294	0.457225	0.452341	0.728626	1	1	0.298964	0.00635294
34291	34300	34695	34705	+	caiF	b0034	cai operon transcriptional activator	60	57	79	41	57	1.38596	0.960463	0.618244	0.634082	0.00635294	0.558321	0.435452	0.464343	1	1	0.116618	0.00635294
4078723	4079297	4079509	4079640	+	yiiE	b3889	CopG family putative transcriptional regulator	41	34	54	29	35	1.54286	0.627648	0.530552	0.457017	0.00639427	0.589984	0.489741	0.61445	1	1	0.206364	0.00639427
2729184			2726281	-	rrlG	b2589	23S ribosomal RNA of rrnG operon	7075	2273	1085	1109	7485	0.144957	1	0.885763	0.763695	0.606926	0.542789	0.843874	0.00641856	1	1	0.735556	0.00641856
1649382			1649434	+	dicF	b1574	-	40	24	56	45	50	1.12	1	0.515262	0.137084	0.00641925	0.501021	0.39265	0.173043	1	1	0.871602	0.00641925
1903883	1903895	1904746	1904754	+	manZ	b1819	mannose-specific enzyme IID component of PTS	269	376	130	344	160	0.8125	1	0.640291	0.00644342	0.0215181	0.62596	0.14177	0.403684	1	1	0.670201	0.00644342
2028058	2028017	2026323	2025849	-	yedQ	b1956	putative membrane-anchored diguanylate cyclase	37	33	89	61	82	1.08537	1	0.00649708	0.226537	0.198177	0.0167603	0.278629	0.527532	1	1	0.783665	0.00649708
4579340	4579337	4577958		-	mcrB	b4346	5-methylcytosine-specific restriction enzyme McrBC, subunit McrB	39	41	55	25	32	1.71875	0.661969	0.255138	0.766748	0.00651228	0.497443	0.298347	0.644303	1	1	0.0810759	0.00651228
3104066	3104093	3104368	3104368	+	yggX	b2962	protein that protects iron-sulfur proteins against oxidative damage	154	144	59	85	63	0.936508	1	0.628896	0.102026	0.96989	0.409059	0.00657169	0.776407	1	1	0.052259	0.00657169
2243695	2243652	2242984	2242984	-	folE	b2153	GTP cyclohydrolase I	390	508	173	216	184	0.940217	1	0.446508	0.00657877	0.65754	0.755692	0.0261464	0.870567	1	1	0.0921581	0.00657877
2796786	2796786	2796337	2796209	-	ygaU	b2665	uncharacterized protein	86	63	144	312	191	0.753927	1	0.250893	0.48623	0.062174	0.107645	0.246492	0.464709	1	1	0.00660293	0.00660293
3634063	3632590	3630968	3630914	-	yhiJ	b3488	DUF4049 family protein	23	26	44	20	22	2	0.350371	0.197255	0.887704	0.00661508	0.460037	0.36529	0.807472	1	1	0.244996	0.00661508
587090	586908	586147	585934	-	envY	b0566	porin thermoregulatory transcriptional activator	22	22	54	26	38	1.42105	0.984644	0.749627	0.309823	0.00661508	0.498601	0.994284	0.484572	1	1	0.427854	0.00661508
1737787	1737844	1738869	1738875	+	purR	b1658	transcriptional repressor, hypoxanthine-binding	146	193	73	118	77	0.948052	1	0.889231	0.0101382	0.29761	0.833224	0.00671998	0.529447	1	1	0.262464	0.00671998
3147755	3146737	3146450	3146422	-	yghW	b2998	DUF2623 family protein	39	39	73	39	48	1.52083	0.552269	0.488679	0.419	0.00679146	0.500554	0.521859	0.646628	1	1	0.312652	0.00679146
2402052	2402052	2401552		-	nuoE	b2285	NADH:ubiquinone oxidoreductase, chain E	180	261	94	139	112	0.839286	1	0.893006	0.00679808	0.598364	0.947053	0.00803293	0.817115	1	1	0.0626493	0.00679808
384755	384616	384059	383936	-	yaiS	b0364	putative PIG-L family deacetylase	20	17	43	23	39	1.10256	1	0.47179	0.21176	0.00682264	0.481472	0.513043	0.138212	1	1	0.539655	0.00682264
1119467	1119447	1119307	1119277	-	yceO	b1058	uncharacterized protein	32	20	72	39	44	1.63636	0.532185	0.755169	0.0128139	0.00687301	0.500554	0.462441	0.707432	1	1	0.789139	0.00687301
	572921	573091		+	ninE	b0548	DLP12 prophage; conserved protein	32	35	63	34	57	1.10526	1	0.483017	0.148769	0.00687301	0.490127	0.906475	0.167898	1	1	0.302687	0.00687301
950252	949568	948660	947006	-	ycaN	b0900	LysR family putative transcriptional regulator	17	18	39	19	38	1.02632	1	0.755883	0.424057	0.00695565	0.479894	0.750369	0.0511613	1	1	0.388893	0.00695565
	2475873	2476178	2476309	+	yfdT	b2363	CPS-53 (KpLE1) prophage; uncharacterized protein	31	38	61	33	45	1.35556	0.797872	0.482845	0.611804	0.00697789	0.496948	0.483344	0.515098	1	1	0.22346	0.00697789
	4319606	4318761		-	phnJ	b4098	carbon-phosphorus lyase, SAM-dependent	15	20	44	22	23	1.91304	0.367367	0.448037	0.440055	0.00699092	0.498601	0.498302	0.800763	1	1	0.392002	0.00699092
	2018386	2019513	2019600	+	fliK	b1943	flagellar hook-length control protein	97	193	84	77	91	0.923077	1	0.392656	0.0500317	0.701622	0.460037	0.0955057	0.756239	1	1	0.00700201	0.00700201
2598865	2598865	2597831	2597740	-	bamC	b2477	BamABCDE complex OM biogenesis lipoprotein	200	261	94	204	125	0.752	1	0.607653	0.00709722	0.063454	0.588219	0.187232	0.524318	1	1	0.68446	0.00709722
3952465	3952484	3953413	3953413	+	ilvE	b3770	branched-chain amino-acid aminotransferase	123	144	67	65	61	1.09836	1	0.824747	0.0644346	0.721185	0.637522	0.00733416	0.979216	1	1	0.0108077	0.00733416
2009725	2009821	2010489	2010489	+	yedK	b1931	DUF159 family protein	26	15	62	41	64	0.96875	1	0.739107	0.00734506	0.112764	0.48379	0.00786627	0.403646	1	1	0.406642	0.00734506
2736068	2736146	2736883	2736899	+	bamD	b2595	BamABCDE complex OM biogenesis lipoprotein	223	287	106	216	133	0.796992	1	0.751292	0.00736812	0.0796506	0.765828	0.0689113	0.476217	1	1	0.441224	0.00736812
2617578	2617578	2617937	2619043	+	yfgD	b2495	putative oxidoreductase	107	158	63	110	67	0.940299	1	0.612385	0.0673106	0.58606	0.928106	0.00743316	0.56683	1	1	0.163459	0.00743316
4317902	4317895	4317215		-	phnL	b4096	ribophosphonate triphosphate synthase subunit; putative ABC transporter ATP-binding protein	16	19	43	23	20	2.15	0.0853116	0.452304	0.328138	0.00743655	0.499604	0.414212	0.994951	1	1	0.400387	0.00743655
1074764	1074011	1072863		-	rutA	b1012	pyrimidine oxygenase, FMN-dependent	45	16	75	46	58	1.2931	1	0.192865	0.00749456	0.11232	0.390522	0.11918	0.713675	1	1	0.429789	0.00749456
4093447	4093438	4093124	4093095	-	rhaM	b3901	L-rhamnose mutarotase	22	26	35	19	31	1.12903	1	0.507074	0.77233	0.00749947	0.498601	0.620008	0.20263	1	1	0.111682	0.00749947
1842150	1842135	1841863	1841594	-	ynjH	b1760	DUF1496 family protein	150	130	66	66	67	0.985075	1	0.882419	0.2292	0.417519	0.452823	0.0385942	0.84298	1	1	0.00753003	0.00753003
1921989			1921775	-	-	predicted RNA	antisense: yebV	89	131	432	640	578	0.747405	1	0.248235	0.139268	0.374015	0.329822	0.0175827	0.958267	1	1	0.00758724	0.00758724
3283143	3283143	3284003	3284169	+	kbaY	b3137	tagatose 6-phosphate aldolase 1, kbaY subunit	23	29	52	25	39	1.33333	1	0.714423	0.835191	0.00759039	0.500433	0.555351	0.400558	1	1	0.289065	0.00759039
	3496551	3496877	3496879	+	nirD	b3366	nitrite reductase, NAD(P)H-binding, small subunit	24	22	47	25	31	1.51613	0.649438	0.482845	0.286705	0.00761893	0.499604	0.877215	0.611129	1	1	0.413891	0.00761893
4639953	4640402	4640542	4640574	+	yjjY	b4402	uncharacterized protein	167	264	132	449	173	0.763006	1	0.645494	0.22267	0.00780083	0.532585	0.184612	0.0123492	1	1	0.923167	0.00780083
579777	579594	579184	579152	-	ybcV	b0558	DLP12 prophage; uncharacterized protein	10	113	101	86	56	1.80357	0.430672	0.00790799	0.444073	0.372558	0.390522	0.0335581	0.634571	1	1	0.218849	0.00790799
785447	785317	784937	784936	-	ybgS	b0753	putative periplasmic protein	29	33	54	154	71	0.760563	1	0.486567	0.649657	0.0445167	0.470937	0.668475	0.138212	1	1	0.00791289	0.00791289
4051036			4051280	+	csrC	b4457	-	477	1342	551	1491	1197	0.460317	0.741903	0.300805	0.119646	0.0591429	0.008063	0.67254	0.776407	1	0.954752	0.707413	0.008063
4352475	4352584	4352880	4352883	+	yjdK	b4128	uncharacterized protein	42	37	60	33	41	1.46341	0.609681	0.519953	0.559243	0.00813579	0.584094	0.435401	0.63009	1	1	0.241496	0.00813579
84323	84368	85312	85505	+	leuO	b0076	global transcription factor	22	20	48	23	35	1.37143	1	0.694447	0.363954	0.00813579	0.502177	0.978025	0.441025	1	1	0.427403	0.00813579
3511438	3511422	3511060	3510977	-	yhfY	b3382	PRD domain protein	22	26	41	23	30	1.36667	0.813422	0.486915	0.540164	0.00814204	0.498601	0.534365	0.517028	1	1	0.221556	0.00814204
1921765	1921780	1922016	1922016	+	yebV	b1836	uncharacterized protein	90	130	391	629	530	0.737736	1	0.227777	0.200324	0.237645	0.247443	0.0347095	0.847472	1	1	0.00828744	0.00828744
2303552	2303497	2303003		-	napF	b2208	ferredoxin-type protein, role in electron transfer to periplasmic nitrate reductase NapA	42	20	72	37	40	1.8	0.412253	0.675508	0.0306673	0.00829911	0.548161	0.714916	0.779827	1	1	0.964866	0.00829911
2630311	2630326	2630865	2630928	+	yfgI	b2506	nalidixic acid resistance protein, putative periplasmic protein	17	24	47	25	29	1.62069	0.532185	0.444865	0.493419	0.00839041	0.492121	0.479866	0.710093	1	1	0.329039	0.00839041
2892211	2892214	2892579	2892656	+	queD	b2765	6-pyruvoyl tetrahydrobiopterin synthase (PTPS)	54	70	53	37	44	1.20455	1	0.596171	0.438642	0.0788651	0.782303	0.125895	0.685277	1	1	0.00865862	0.00865862
3157521	3157650	3158576	3158597	+	yqhG	b3013	DUF3828 family putative periplasmic protein	32	31	65	31	52	1.25	1	0.230436	0.613745	0.00882595	0.390522	0.882849	0.28834	1	1	0.37386	0.00882595
2433951	2433926	2433012	2433012	-	accD	b2316	acetyl-CoA carboxylase, beta (carboxyltransferase) subunit	302	308	111	222	132	0.840909	1	0.31139	0.00886645	0.0981968	0.535455	0.0921884	0.484572	1	1	0.500062	0.00886645
4049899			4050007	+	spf	b3864	-	37	61	57	38	29	1.96552	0.14624	0.685488	0.550739	0.0332153	0.924911	0.00895022	0.838491	1	1	0.0174257	0.00895022
1208131	1208132	1208545	1208770	+	tfaP	b1155	e14 prophage; uncharacterized protein	25	24	48	26	35	1.37143	0.798204	0.483512	0.348189	0.00900475	0.498601	0.818473	0.533488	1	1	0.36157	0.00900475
3744211	3744328	3744801	3744803	+	yiaM	b3577	2,3-diketo-L-gulonate TRAP transporter small permease protein	38	30	49	27	38	1.28947	1	0.55289	0.708221	0.00926101	0.521242	0.536818	0.434715	1	1	0.253334	0.00926101
960109	960264	961028	961200	+	ycaL	b0909	putative peptidase-related chaperone	18	27	37	20	30	1.23333	1	0.482845	0.67003	0.00926835	0.497337	0.494136	0.3524	1	1	0.146095	0.00926835
1810049	1810211	1810801	1810933	+	ydjM	b1728	inner membrane protein regulated by LexA	23	26	44	24	37	1.18919	1	0.490745	0.719888	0.00950736	0.497939	0.702532	0.270731	1	1	0.260644	0.00950736
	3301485	3302480		+	yhbU	b3158	U32 peptidase family protein	22	17	37	19	31	1.19355	1	0.654355	0.482972	0.00950736	0.511465	0.994837	0.272011	1	1	0.392323	0.00950736
	2104509	2103391	2102912	-	wbbK	b2032	lipopolysaccharide biosynthesis protein	55	69	52	49	30	1.73333	0.609681	0.383573	0.317773	0.650116	0.858507	0.00966388	0.546275	1	1	0.20691	0.00966388
3383426			3384442	+	-	predicted RNA	antisense: mdh	840	984	213	669	318	0.669811	1	0.96278	0.00969937	0.150688	0.473385	0.926589	0.831908	1	1	0.716855	0.00969937
3236517	3236540	3237232	3237278	+	ygjQ	b3086	DUF218 superfamily protein	41	35	70	34	49	1.42857	0.988991	0.342095	0.669687	0.0097777	0.496948	0.0736502	0.515098	1	1	0.358207	0.0097777
	2087062	2085704	2085700	-	plaP	b2014	putrescine importer, low affinity	132	135	73	57	65	1.12308	1	0.956013	0.164558	0.413381	0.681167	0.0589166	0.818311	1	1	0.00978897	0.00978897
	1044676	1044230	1044211	-	etp	b0982	Protein-tyrosine-phosphatase, role in O-antigen capsule formation; dephosphorylates Etk-P	20	20	44	24	29	1.51724	0.568349	0.46901	0.290343	0.00988055	0.494862	0.827788	0.666296	1	1	0.424432	0.00988055
3356818			3356155	-	-	predicted RNA	antisense: gltB	707	851	228	420	382	0.596859	1	0.63897	0.00994532	0.315564	0.476682	0.883483	0.776407	1	1	0.427519	0.00994532
450641	450641	448650		-	cyoB	b0431	cytochrome o ubiquinol oxidase subunit I	452	605	122	230	175	0.697143	1	0.79724	0.00994594	0.997566	0.473385	0.714916	0.776222	1	1	0.488326	0.00994594
1020124	1020053	1019013	1018985	-	ompA	b0957	outer membrane protein A (3a;II*;G;d)	5032	5680	728	3781	1462	0.497948	1	0.865702	0.0100307	0.167003	0.458446	0.973849	0.847938	1	1	0.710064	0.0100307
2386930	2386934	2387437	2387783	+	yfbM	b2272	DUF1877 family protein	32	25	68	35	45	1.51111	0.799358	0.739107	0.232108	0.0100666	0.500697	0.965742	0.597867	1	1	0.51617	0.0100666
2724128	2724128	2724451	2725796	+	yfiM	b2586	putative lipoprotein	137	331	121	315	168	0.720238	1	0.471917	0.0102532	0.0284398	0.410506	0.0400214	0.270731	1	1	0.599828	0.0102532
1641700			1641687	-	-	predicted RNA	-	16	429	197	582	225	0.875556	1	0.920765	0.0531784	0.0106811	0.940767	0.0273856	0.0102554	1	1	0.691436	0.0102554
	2482176	2480638	2477808	-	emrY	b2367	putative multidrug efflux system	27	23	52	25	37	1.40541	1	0.187284	0.499169	0.0102874	0.394993	0.843874	0.484572	1	1	0.406642	0.0102874
2760402	2760547	2761173	2765885	+	yfjJ	b2626	CP4-57 prophage; uncharacterized protein	18	25	32	17	27	1.18519	1	0.492575	0.612009	0.0102874	0.498079	0.452189	0.294169	1	1	0.0898406	0.0102874
4156013	4156013	4156789	4156806	+	argB	b3959	acetylglutamate kinase	144	170	103	88	74	1.39189	1	0.461947	0.208047	0.546963	0.689183	0.0104634	0.838685	1	1	0.0515926	0.0104634
	2475511	2475873		+	yfdS	b2362	CPS-53 (KpLE1) prophage; uncharacterized protein	41	27	73	40	50	1.46	0.815908	0.501563	0.189131	0.0105216	0.500963	0.847184	0.568527	1	1	0.668257	0.0105216
	520416	522830	522830	+	ybbP	b0496	putative ABC transporter permease	30	31	67	31	40	1.675	0.724899	0.0105609	0.283832	0.0178377	0.384399	0.923435	0.661265	1	1	0.432234	0.0105609
767978	767978	770611	770714	+	mngB	b0732	alpha-mannosidase	29	25	66	39	60	1.1	1	0.0105609	0.212825	0.143061	0.106799	0.28225	0.441025	1	1	0.935203	0.0105609
3083969	3086187	3086402	3086403	+	yqgC	b2940	uncharacterized protein	209	295	143	159	130	1.1	1	0.541029	0.147812	0.730302	0.929897	0.0106278	0.869466	1	1	0.0277261	0.0106278
3332792	3332735	3331770	3331770	-	yhbE	b3184	EamA family inner membrane putative transporter	55	115	55	55	50	1.1	1	0.383573	0.0777821	0.739595	0.452823	0.0107022	0.971369	1	1	0.0153122	0.0107022
1978381	1978197	1977847	1977845	-	flhD	b1892	flagellar class II regulon transcriptional activator, with FlhC	153	185	87	113	81	1.07407	1	0.574435	0.127043	0.994732	0.754306	0.0107022	0.773832	1	1	0.0775925	0.0107022
3771761	3771744	3771382	3771380	-	yibI	b3598	DUF3302 family inner membrane protein	36	29	64	35	48	1.33333	0.938112	0.49822	0.298958	0.0110527	0.500554	0.999264	0.515098	1	1	0.42516	0.0110527
2579617	2579636	2581639	2581734	+	tktB	b2465	transketolase 2, thiamine triphosphate-binding	66	60	114	210	161	0.708075	1	0.152723	0.30629	0.915808	0.0110542	0.11282	0.775826	1	0.641379	0.0159461	0.0110542
1878742	1878773	1878871	1878871	+	yoaK	b4676	inner membrane-associated protein	41	87	61	56	40	1.525	0.651343	0.53107	0.364912	0.271626	0.538815	0.0110545	0.787053	1	1	0.0438581	0.0110545
4410549	4410553	4411251	4411301	+	yjfJ	b4182	PspA/IM30 family protein	26	31	57	29	34	1.67647	0.609681	0.72959	0.800018	0.0110647	0.502177	0.475154	0.71805	1	1	0.311602	0.0110647
1198219	1198695	1199588	1200201	+	lit	b1139	e14 prophage; cell death peptidase, inhibitor of T4 late gene expression	22	29	44	22	26	1.69231	0.627648	0.698862	0.811298	0.0110772	0.509795	0.386794	0.709098	1	1	0.194566	0.0110772
1615686	1615763	1616878	1617027	+	yneK	b1527	uncharacterized protein	30	31	67	33	48	1.39583	1	0.128918	0.545884	0.0110772	0.364239	0.799676	0.481561	1	1	0.396316	0.0110772
1049438	1049332	1048688		-	gfcB	b0986	O-antigen capsule production lipoprotein	34	20	56	29	45	1.24444	1	0.659674	0.212155	0.0111247	0.510874	0.642496	0.344652	1	1	0.580081	0.0111247
2167633	2167520	2167302	2164018	-	ogrK	b2082	positive regulator of P2 growth (insertion of P2 ogr gene into the chromosome)	29	23	41	24	26	1.57692	0.609681	0.519459	0.332758	0.0111779	0.533925	0.6956	0.709611	1	1	0.358207	0.0111779
1374933	1374963	1376015	1376033	+	ycjQ	b1313	putative Zn-dependent NAD(P)-binding oxidoreductase	19	18	50	25	34	1.47059	0.930899	0.928098	0.256455	0.0112044	0.500697	0.95541	0.566367	1	1	0.486579	0.0112044
1216341	1216369	1216635	1216708	+	ariR	b1166	RcsB connector protein for regulation of biofilm and acid-resistance	13	18	36	21	17	2.11765	0.158805	0.756606	0.268357	0.0112163	0.504538	0.473409	0.979216	1	1	0.465035	0.0112163
3902288	3902220	3900604	3900578	-	bglH	b3720	carbohydrate-specific outer membrane porin, cryptic	36	30	54	26	43	1.25581	1	0.226437	0.739243	0.0114214	0.390522	0.809049	0.292908	1	1	0.31065	0.0114214
2988502	2988502	2989311		+	yqeI	b2847	putative transcriptional regulator	29	31	49	25	32	1.53125	0.829868	0.720123	0.911522	0.0114583	0.529372	0.452189	0.60543	1	1	0.225863	0.0114583
4376282	4376317	4376442	4376488	+	ecnA	b4410	entericidin A membrane lipoprotein, antidote entericidin B	49	114	61	64	59	1.0339	1	0.539687	0.286904	0.363589	0.500702	0.0468126	0.884172	1	1	0.0114687	0.0114687
753184	752795	752229	752224	-	ybgD	b0719	putative fimbrial-like adhesin protein	29	23	56	30	50	1.12	1	0.723597	0.30629	0.0115419	0.498601	0.733289	0.196664	1	1	0.430283	0.0115419
2192222	2192222	2191680	2191680	-	yehD	b2111	putative fimbrial-like adhesin protein	20	20	41	22	27	1.51852	0.609681	0.478655	0.367967	0.0115479	0.498601	0.640091	0.673344	1	1	0.369091	0.0115479
2976385			2976304	-	omrB	b4445	-	37	43	83	51	51	1.62745	0.532185	0.749824	0.285763	0.0116998	0.500697	0.778467	0.775826	1	1	0.447838	0.0116998
152231	152231	151626	151600	-	yadL	b0137	putative fimbrial-like adhesin protein	40	27	61	32	55	1.10909	1	0.350009	0.379323	0.0118421	0.52779	0.810354	0.184328	1	1	0.416415	0.0118421
3727769	3727748	3727407	3727362	-	yiaB	b3563	YiaAB family inner membrane protein	62	58	83	46	59	1.40678	0.899874	0.648376	0.763874	0.0119251	0.558763	0.436331	0.552446	1	1	0.176983	0.0119251
1191986	1191986	1190616	1190616	-	purB	b1131	adenylosuccinate lyase	220	225	81	140	98	0.826531	1	0.324685	0.0120232	0.171197	0.646254	0.1449	0.617301	1	1	0.426511	0.0120232
2427008	2426788	2426006	2425982	-	hisJ	b2309	histidine/lysine/arginine/ornithine transporter subunit	248	257	99	191	106	0.933962	1	0.429696	0.0120232	0.109788	0.479894	0.0126297	0.315384	1	1	0.420502	0.0120232
279177	278802	277756	275118	-	afuC	b0262	CP4-6 prophage; putative ferric transporter subunit	21	22	43	22	30	1.43333	1	0.757464	0.694643	0.0120435	0.508093	0.559833	0.524757	1	1	0.358207	0.0120435
709783	709790	710116	710184	+	chiQ	b0682	chitosugar-induced verified lipoprotein	17	38	45	25	28	1.60714	0.553847	0.450553	0.634082	0.0120862	0.494862	0.247412	0.733742	1	1	0.0667389	0.0120862
3526154	3526149	3525589	3525339	-	nudE	b3397	adenosine nucleotide hydrolase; substrates include Ap3A, Ap2A, ADP-ribose, NADH	82	142	63	94	64	0.984375	1	0.500999	0.0800968	0.707368	0.640256	0.0120921	0.650183	1	1	0.160999	0.0120921
	1305764	1306768	1308645	+	oppF	b1247	oligopeptide transporter subunit	248	320	114	242	132	0.863636	1	0.519011	0.0121703	0.0952132	0.658714	0.102485	0.484572	1	1	0.892171	0.0121703
1704550	1704551	1704676	1704707	+	blr	b4409	beta-lactam resistance membrane protein; divisome-associated protein	40	56	67	40	43	1.55814	0.645563	0.500999	0.911522	0.0123029	0.504157	0.28181	0.696479	1	1	0.0703192	0.0123029
3267821	3267854	3268393	3268400	+	yhaB	b3120	uncharacterized protein	42	31	72	37	39	1.84615	0.388979	0.653247	0.379323	0.0123146	0.598875	0.519316	0.828895	1	1	0.422338	0.0123146
2521329	2525127	2525891	2526830	+	yfeN	b2408	putative outer membrane protein	22	21	46	24	31	1.48387	0.911914	0.732379	0.421505	0.0123146	0.500697	0.77709	0.569974	1	1	0.406642	0.0123146
3158627	3158627	3158884	3159028	+	yqhH	b3014	outer membrane lipoprotein, Lpp paralog	42	45	76	43	64	1.1875	1	0.490745	0.570054	0.0123146	0.497542	0.762746	0.355507	1	1	0.2759	0.0123146
2024982	2024986	2025213	2025213	+	yodD	b1953	uncharacterized protein	26	37	96	160	121	0.793388	1	0.403127	0.190013	0.681868	0.432899	0.101557	0.814849	1	1	0.0123588	0.0123588
3267142	3267065	3266127	3266127	-	tdcA	b3118	tdc operon transcriptional activator	39	26	62	31	43	1.44186	1	0.272714	0.444637	0.0123717	0.434781	0.883483	0.51735	1	1	0.429111	0.0123717
3367827	3367827	3368954	3370563	+	yhcG	b3220	DUF1016 family protein in the PD-(D/E)XK nuclease superfamily	19	20	45	23	21	2.14286	0.175087	0.9242	0.473704	0.0124011	0.514649	0.472662	0.956122	1	1	0.420932	0.0124011
2455815	2455646	2455083	2455040	-	yfcV	b2339	putative fimbrial-like adhesin protein	14	14	34	19	24	1.41667	0.672643	0.460694	0.207078	0.0124062	0.48954	0.922816	0.628568	1	1	0.657982	0.0124062
3384461	3384268	3383330	3381704	-	mdh	b3236	malate dehydrogenase, NAD(P)-binding	866	989	223	684	327	0.681957	1	0.916961	0.0124079	0.151883	0.474298	0.912621	0.831908	1	1	0.714896	0.0124079
912161	912150	911182	911050	-	hcr	b0872	HCP oxidoreductase, NADH-dependent	36	12	50	40	50	1	1	0.320291	0.0124209	0.301917	0.390522	0.0207969	0.671592	1	1	0.239213	0.0124209
111846	111846	111649	111203	-	yacG	b0101	DNA gyrase inhibitor	58	112	61	78	52	1.17308	1	0.565473	0.287097	0.738274	0.596739	0.012437	0.691214	1	1	0.0960808	0.012437
4606165			4606079	-	leuV	b4368	Leu tRNA	209	319	140	195	155	0.903226	1	0.63897	0.162117	0.878312	0.988929	0.0124417	0.831908	1	1	0.0414256	0.0124417
4247900	4247971	4249311	4249324	+	lamB	b4036	maltose outer membrane porin (maltoporin)	115	133	105	362	102	1.02941	1	0.446508	0.477954	0.013735	0.474298	0.478184	0.0124918	1	0.287502	0.186554	0.0124918
803399	803503	805764	807294	+	ybhJ	b0771	putative hydratase	33	36	74	44	67	1.10448	1	0.0124991	0.295179	0.129341	0.105081	0.373929	0.425857	1	1	0.823638	0.0124991
3593438	3593437	3592724	3592679	-	livF	b3454	leucine/isoleucine/valine transporter subunit	137	172	77	93	77	1	1	0.768759	0.0471525	0.90241	0.801388	0.0126125	0.831772	1	1	0.0652979	0.0126125
	3312777	3311833	3311766	-	truB	b3166	tRNA pseudouridine synthase B: tRNA pseudouridine(55) synthase and putative tmRNA pseudouridine(342) synthase	89	130	61	67	58	1.05172	1	0.490745	0.0678097	0.935866	0.980669	0.0127703	0.870649	1	1	0.0444341	0.0127703
4207553	4207532	4205943	4205943	-	purH	b4006	fused IMP cyclohydrolase/phosphoribosylaminoimidazolecarboxamide formyltransferase	169	193	70	105	76	0.921053	1	0.370732	0.0128408	0.284209	0.612634	0.0512261	0.662725	1	1	0.334765	0.0128408
3067313	3067173	3066277	3060774	-	ygfI	b2921	putative DNA-binding transcriptional regulator	28	31	60	30	45	1.33333	1	0.363477	0.721316	0.0129516	0.958315	0.636694	0.446443	1	1	0.358207	0.0129516
4475315	4475437	4477251	4478455	+	yjgL	b4253	uncharacterized protein	20	27	41	20	21	1.95238	0.404654	0.179795	0.935951	0.0130174	0.443541	0.305527	0.828895	1	1	0.1989	0.0130174
832958	832950	832468	832468	-	ybiA	b0798	DUF1768 family protein	27	20	54	33	31	1.74194	0.367367	0.483512	0.184017	0.0130572	0.501021	0.895585	0.943937	1	1	0.817511	0.0130572
3204589	3204589	3204221	3204138	-	folB	b3058	bifunctional dihydroneopterin aldolase/dihydroneopterin triphosphate 2'-epimerase	50	52	75	42	58	1.2931	1	0.681677	0.775182	0.0130635	0.50426	0.478236	0.478354	1	1	0.180969	0.0130635
3860045	3860283	3861176	3861185	+	yidL	b3680	AraC family putative transcriptional regulator	27	24	45	23	28	1.60714	0.661969	0.916237	0.717501	0.0131117	0.549911	0.50384	0.70946	1	1	0.35287	0.0131117
583638	583681	584430	585796	+	appY	b0564	global transcriptional activator; DLP12 prophage	16	24	46	26	19	2.42105	0.0131931	0.448037	0.61269	0.0215145	0.502177	0.250618	0.760873	1	1	0.383824	0.0131931
2644388	2644283	2643129	2643017	-	rlmN	b2517	dual specificity 23S rRNA m(2)A2503, tRNA m(2)A37 methyltransferase, SAM-dependent	73	114	54	60	51	1.05882	1	0.468074	0.0691622	0.971449	0.836676	0.0133062	0.844973	1	1	0.0574883	0.0133062
563320	563330	563845	563845	+	sfmF	b0534	FimA homolog, function unknown	30	29	67	35	54	1.24074	1	0.747258	0.334428	0.0133975	0.496948	0.885032	0.355117	1	1	0.426156	0.0133975
1212081	1212003	1211680	1211680	-	iraM	b1160	RpoS stabilzer during Mg starvation, anti-RssB factor	37	33	69	39	54	1.27778	1	0.489405	0.325021	0.0134114	0.498601	0.995146	0.483432	1	1	0.40935	0.0134114
3906844	3906567	3905731	3905598	-	bglG	b3723	transcriptional antiterminator of the bgl operon	25	24	43	22	30	1.43333	0.946927	0.679167	0.844158	0.0134491	0.510404	0.521866	0.552446	1	1	0.304433	0.0134491
1556319	1556280	1556065	1556017	-	bdm	b1481	biofilm-dependent modulation protein	33	32	46	121	47	0.978723	1	0.520862	0.581331	0.154935	0.498601	0.95504	0.0135945	1	1	0.0370288	0.0135945
4240322	4240055	4239777	4238331	-	yjbT	b4620	putative periplasmic protein	46	31	66	37	43	1.53488	0.553847	0.523265	0.30496	0.0136137	0.629004	0.773351	0.721451	1	1	0.426264	0.0136137
3362112	3362112	3362786	3362806	+	yhcA	b3215	putative periplasmic chaperone protein	26	20	52	27	32	1.625	0.647764	0.71963	0.256528	0.013621	0.502928	0.917639	0.710545	1	1	0.505009	0.013621
	2298718	2298269	2298260	-	napB	b2203	nitrate reductase, small, cytochrome C550 subunit, periplasmic	21	16	46	26	34	1.35294	0.825198	0.472447	0.123935	0.013735	0.494756	0.657324	0.56683	1	1	0.860582	0.013735
1771058	1771071	1772285	1772292	+	ydiM	b1690	MFS superfamily sugar transport 1 family protein	22	23	55	27	36	1.52778	0.938112	0.244613	0.458149	0.013735	0.473385	0.776364	0.586941	1	1	0.429656	0.013735
1854857	1854854	1854096	1854096	-	ydjF	b1770	putative DNA-binding transcriptional regulator	32	37	65	33	40	1.625	0.773378	0.542224	0.898252	0.0137655	0.538221	0.482855	0.663948	1	1	0.302687	0.0137655
4315103	4315102	4314344	4313209	-	phnP	b4092	5-phospho-alpha-D-ribosyl 1,2-cyclic phosphate phosphodiesterase	13	20	38	21	22	1.72727	0.430672	0.437027	0.552389	0.0137751	0.493914	0.456636	0.814451	1	1	0.349813	0.0137751
761520	761522	762739	762739	+	sucB	b0727	dihydrolipoyltranssuccinase	493	683	160	284	230	0.695652	1	0.769757	0.0138097	0.637455	0.476504	0.80104	0.776407	1	1	0.406642	0.0138097
2508460	2508242	2507916	2507895	-	fryB	b2387	putative enzyme IIB component of PTS	33	16	50	29	30	1.66667	0.475712	0.514729	0.0564706	0.0138679	0.569146	0.722541	0.789786	1	1	0.953138	0.0138679
	1460471	1460893		+	paaI	b1396	hydroxyphenylacetyl-CoA thioesterase	26	19	41	26	39	1.05128	1	0.508868	0.179063	0.0138679	0.498601	0.720805	0.412053	1	1	0.507341	0.0138679
2534066	2534066	2535793	2535793	+	ptsI	b2416	PEP-protein phosphotransferase of PTS system (enzyme I)	548	767	151	572	266	0.567669	1	0.802518	0.0138851	0.119323	0.481794	0.816745	0.837406	1	1	0.707413	0.0138851
	3617776	3618582	3618582	+	nikE	b3480	nickel transporter subunit	14	20	41	22	24	1.70833	0.441095	0.441807	0.45296	0.0139543	0.49621	0.50384	0.809321	1	1	0.398991	0.0139543
1087716	1092876	1094234	1095503	+	ycdT	b1025	diguanylate cyclase, membrane-anchored	23	28	61	30	40	1.525	0.938112	0.0432801	0.520771	0.0139543	0.332333	0.689699	0.586941	1	1	0.406642	0.0139543
570893	570893	571444	571453	+	ybcL	b0545	inactive polymorphonuclear leukocyte migration suppressor; DLP12 prophage; secreted protein, UPF0098 family	33	36	58	32	44	1.31818	1	0.698599	0.961027	0.0139609	0.502177	0.522741	0.484572	1	1	0.260968	0.0139609
3360622			3359712	-	-	predicted RNA	antisense: gltD	479	652	174	333	280	0.621429	1	0.763393	0.0142352	0.319393	0.494644	0.947371	0.776407	1	1	0.615062	0.0142352
763664			762087	-	-	predicted RNA	antisense: sucB sucC	563	784	159	314	238	0.668067	1	0.797347	0.0142362	0.992663	0.476682	0.856923	0.776407	1	1	0.732149	0.0142362
1648823	1648823	1649041	1649381	+	ydfC	b1573	uncharacterized protein, Qin prophage	37	42	61	41	39	1.5641	0.609681	0.501563	0.678539	0.0143688	0.502971	0.379971	0.847938	1	1	0.121902	0.0143688
1857789	1857769	1856933	1856933	-	ydjI	b1773	putative aldolase	32	33	72	36	52	1.38462	1	0.284722	0.536652	0.0144883	0.474298	0.790242	0.515098	1	1	0.413356	0.0144883
1916128	1916128	1915631	1915535	-	msrC	b1832	free methionine-(R)-sulfoxide reductase	153	235	96	169	106	0.90566	1	0.540287	0.0261659	0.300548	0.777403	0.0145932	0.524757	1	1	0.289065	0.0145932
312830	312777	312514		-	ykgM	b0296	50S ribosomal protein L31 type B; alternative L31 utilized during zinc limitation	23	32	53	31	34	1.55882	0.609681	0.462965	0.45706	0.0146714	0.498601	0.481825	0.726602	1	1	0.289065	0.0146714
3005360	3006262	3007452	3007491	+	ygeW	b2870	putative carbamoyltransferase	37	40	64	32	53	1.20755	1	0.221196	0.954778	0.0147751	0.390522	0.63569	0.294371	1	1	0.253929	0.0147751
1638204	1638109	1637954	1637815	-	ynfN	b1551	Qin prophage; cold shock-induced protein	13	28	41	25	37	1.10811	1	0.793066	0.49228	0.0148968	0.467457	0.944813	0.286109	1	1	0.23503	0.0148968
1824962	1824937	1824362	1823931	-	ves	b1742	cold- and stress-inducible protein	122	164	95	80	83	1.14458	1	0.43617	0.188276	0.423137	0.679058	0.0419805	0.867098	1	1	0.0150268	0.0150268
1105340	1105414	1105725	1105819	+	ymdA	b1044	uncharacterized protein	121	136	84	72	63	1.33333	0.96348	0.565724	0.306968	0.287651	0.566971	0.0151037	0.950121	1	1	0.0197294	0.0151037
1813132	1813132	1812329	1810892	-	ydjO	b1730	uncharacterized protein	21	39	44	23	29	1.51724	0.800457	0.73181	0.545392	0.0151088	0.500963	0.270422	0.646956	1	1	0.0534564	0.0151088
3757827	3757827	3756676	3756518	-	yiaY	b3589	putative Fe-containing alcohol dehydrogenase, Pfam00465 family	34	31	60	30	39	1.53846	0.888193	0.226831	0.685746	0.0151216	0.432992	0.536818	0.63197	1	1	0.371305	0.0151216
2750730	2750708	2750115	2750115	-	grpE	b2614	heat shock protein	210	205	86	129	93	0.924731	1	0.653471	0.0327174	0.551312	0.500697	0.0152294	0.691482	1	1	0.172436	0.0152294
191584			189728	-	-	predicted RNA	antisense: rpsB tsf tff	1338	1925	242	757	374	0.647059	1	0.863251	0.0152316	0.798496	0.445445	0.418598	0.840601	1	1	0.981018	0.0152316
3280195	3280217	3280690	3280690	+	agaV	b3133	N-acetylgalactosamine-specific enzyme IIB component of PTS	39	32	62	35	54	1.14815	1	0.691127	0.521028	0.0153018	0.501111	0.975702	0.272011	1	1	0.366842	0.0153018
2474980	2474984	2475520		+	yfdR	b2361	CPS-53 (KpLE1) prophage; conserved protein	33	21	57	32	50	1.14	1	0.706019	0.188504	0.0153209	0.500433	0.48355	0.26501	1	1	0.707855	0.0153209
1989490	1989490	1989251	1989021	-	yecH	b1906	DUF2492 family protein	35	30	74	43	41	1.80488	0.335507	0.472821	0.184633	0.0154355	0.500697	0.883483	0.870649	1	1	0.737779	0.0154355
	2110138	2109581		-	rfbC	b2038	dTDP-4-deoxyrhamnose-3,5-epimerase	54	77	50	56	36	1.38889	0.913974	0.520354	0.322111	0.709747	0.861231	0.0154406	0.618603	1	1	0.176843	0.0154406
1908777	1908766	1908623	1908549	-	mgrB	b1826	regulatory peptide for PhoPQ, feedback inhibition	54	172	117	139	85	1.37647	0.749565	0.471917	0.387289	0.694616	0.494485	0.0155058	0.52183	1	1	0.227606	0.0155058
4496405			4496489	+	leuX	b4270	Leu tRNA	66	76	74	47	61	1.21311	1	0.55054	0.681252	0.0187997	0.410692	0.30073	0.445552	1	1	0.0157821	0.0157821
1948151	1948151	1947411	1947384	-	yebC	b1864	UPF0082 family protein	163	213	84	126	95	0.884211	1	0.949304	0.0158276	0.477255	0.971315	0.018244	0.732242	1	1	0.173734	0.0158276
	2880387	2879788	2879774	-	casE	b2756	CRISPR RNA precursor cleavage enzyme; CRISP RNA (crRNA) containing Cascade antiviral complex protein	41	31	65	34	44	1.47727	0.930899	0.987565	0.53601	0.0158439	0.548126	0.615556	0.595914	1	1	0.401265	0.0158439
1813829	1813663	1813421	1813418	-	cedA	b1731	cell division modulator	41	37	67	39	53	1.26415	0.928249	0.50208	0.389088	0.015901	0.498601	0.832668	0.518493	1	1	0.351779	0.015901
142670	142670	142008	142002	-	can	b0126	carbonic anhydrase	497	523	183	516	299	0.61204	0.962173	0.349178	0.0160613	0.0214157	0.550954	0.976307	0.999305	1	1	0.678693	0.0160613
237332	237335	238120	238173	+	yafT	b0217	lipoprotein	22	24	54	28	40	1.35	1	0.741188	0.463792	0.0161453	0.498601	0.883984	0.515098	1	1	0.424432	0.0161453
3281665	3281976	3283130	3283142	+	agaS	b3136	tagatose-6-phosphate ketose/aldose isomerase	31	32	62	31	54	1.14815	1	0.18701	0.700839	0.0162919	0.340388	0.929892	0.256157	1	1	0.367147	0.0162919
1244694	1244728	1244982	1245049	+	ymgE	b1195	UPF0410 family putative inner membrane protein	116	39	129	125	159	0.811321	1	0.483017	0.0683961	0.522947	0.441842	0.0163796	0.644119	1	1	0.241496	0.0163796
4504058	4504058	4505275	4505275	+	yjhB	b4279	putative transporter	37	30	73	36	32	2.28125	0.112794	0.148838	0.383486	0.0164141	0.499604	0.468579	0.963475	1	1	0.443069	0.0164141
2028370	2028370	2028188	2028060	-	yodC	b1957	uncharacterized protein	82	43	157	125	167	0.94012	1	0.492928	0.0211985	0.212279	0.488452	0.0165059	0.560604	1	1	0.321363	0.0165059
1893367	1893367	1893711	1893738	+	yoaB	b1809	putative reactive intermediate deaminase	135	153	67	104	70	0.957143	1	0.83142	0.116274	0.791274	0.624412	0.0165059	0.688312	1	1	0.139767	0.0165059
	2622234	2622872	2622872	+	purN	b2500	phosphoribosylglycinamide formyltransferase 1	207	303	120	198	149	0.805369	1	0.757803	0.0166263	0.26257	0.499604	0.0861585	0.736331	1	1	0.31325	0.0166263
2770428	2770445	2770681		+	ypjK	b2635	CP4-57 prophage; putative inner membrane protein	45	28	63	37	60	1.05	1	0.522456	0.235398	0.0168023	0.498601	0.574806	0.26501	1	1	0.629576	0.0168023
	1649794	1649985	1650425	+	ydfD	b1576	Qin prophage; uncharacterized protein	17	23	54	32	43	1.25581	1	0.773716	0.161375	0.0168023	0.482073	0.585697	0.484572	1	1	0.792819	0.0168023
1511629	1511654	1512799	1512799	+	ydcS	b1440	polyhydroxybutyrate (PHB) synthase, ABC transporter periplasmic binding protein homolog	28	27	62	88	71	0.873239	1	0.142341	0.477954	0.540307	0.0169258	0.41488	0.809321	1	1	0.219947	0.0169258
2578620	2578666	2579616	2579616	+	talA	b2464	transaldolase A	71	66	107	202	151	0.708609	1	0.200743	0.77733	0.119062	0.0169258	0.302981	0.728298	1	0.641379	0.146961	0.0169258
1878872	1878874	1878948	1879286	+	yoaJ	b4675	inner membrane-associated protein	37	46	66	44	49	1.34694	1	0.492575	0.786461	0.0169358	0.499604	0.562049	0.555783	1	1	0.12029	0.0169358
1810934	1810934	1812325	1812475	+	ydjN	b1729	putative transporter	282	292	95	135	108	0.87963	1	0.353738	0.0169806	0.391157	0.577213	0.117608	0.828895	1	1	0.260968	0.0169806
	3461974	3462351		+	gspI	b3330	general secretory pathway component, cryptic	47	29	70	40	77	0.909091	1	0.530552	0.269065	0.0170416	0.499604	0.380874	0.0388291	1	1	0.522383	0.0170416
3313341	3313178	3312777		-	rbfA	b3167	30s ribosome binding factor	102	135	61	77	62	0.983871	1	0.599791	0.1349	0.876266	0.844526	0.0170603	0.85286	1	1	0.04456	0.0170603
4275144	4275041	4274760	4274750	-	yjcB	b4060	putative inner membrane protein	23	58	45	33	27	1.66667	0.485382	0.483017	0.469318	0.0861737	0.501111	0.0189557	0.944096	1	1	0.0172068	0.0172068
3151243	3151243	3150818	3150749	-	exbD	b3005	membrane spanning protein in TonB-ExbB-ExbD complex	177	324	129	275	214	0.602804	1	0.46926	0.017315	0.0841773	0.401256	0.244527	0.776407	1	1	0.450291	0.017315
990402	990356	989154	988996	-	pncB	b0931	nicotinate phosphoribosyltransferase	183	294	102	215	139	0.733813	1	0.656578	0.0173625	0.1227	0.796073	0.376794	0.68287	1	1	0.937026	0.0173625
1418012	1418671	1419159	1420230	+	sieB	b1353	Rac prophage; phage superinfection exclusion protein	28	27	55	31	40	1.375	0.930899	0.489479	0.450371	0.0173972	0.499604	0.737088	0.575061	1	1	0.383824	0.0173972
3455578	3455578	3456393		+	gspC	b3324	general secretory pathway component, cryptic	25	27	51	27	47	1.08511	1	0.689679	0.74797	0.0177623	0.500554	0.926848	0.193526	1	1	0.35822	0.0177623
720490	720460	718262		-	speF	b0693	ornithine decarboxylase isozyme, inducible	26	19	58	30	46	1.26087	1	0.0177711	0.17558	0.0334817	0.188228	0.395875	0.419391	1	1	0.776903	0.0177711
3234455	3234455	3234141		-	higB	b3083	mRNA interferase toxin of the HigB-HigA toxin-antitoxin system	39	38	59	34	38	1.55263	0.527079	0.515262	0.733535	0.0177909	0.467457	0.376794	0.776438	1	1	0.245908	0.0177909
4427422	4427422	4426628	4426588	-	yjfZ	b4204	uncharacterized protein	35	47	65	34	44	1.47727	0.946927	0.326405	0.666208	0.0178473	0.498601	0.398935	0.601653	1	1	0.16871	0.0178473
3923743	3923680	3923057	3922617	-	rsmG	b3740	16S rRNA m(7)G527 methyltransferase, SAM-dependent; glucose-inhibited cell-division protein	42	80	44	41	47	0.93617	1	0.631445	0.242524	0.434848	0.616562	0.119888	0.773157	1	1	0.0180456	0.0180456
	1782681	1782974	1783030	+	ydiT	b1700	putative 3Fe-4S ferredoxin-type protein	19	23	42	25	38	1.10526	1	0.471917	0.340068	0.0182283	0.476682	0.902983	0.316654	1	1	0.395976	0.0182283
1169061	1169073	1169330	1170386	+	bhsA	b1112	biofilm, cell surface and signaling protein	21	22	51	30	31	1.64516	0.532185	0.457818	0.224293	0.0182322	0.498601	0.935353	0.80462	1	1	0.677324	0.0182322
3898022	3898022	3898609	3899203	+	cbrC	b3717	UPF0167 family protein	46	48	87	45	59	1.47458	0.946927	0.346933	0.835191	0.0182322	0.501111	0.522806	0.601242	1	1	0.339711	0.0182322
2710059	2710012	2709437	2709437	-	rpoE	b2573	RNA polymerase sigma E factor	134	245	160	413	212	0.754717	1	0.29738	0.254128	0.0182322	0.357926	0.606934	0.405892	1	1	0.410152	0.0182322
252700	252709	253161	253270	+	yafP	b0234	putative acyl-CoA transferase	37	25	60	34	49	1.22449	1	0.516188	0.281112	0.0182322	0.500697	0.840264	0.445789	1	1	0.496427	0.0182322
949663	949668	950258	951142	+	ycaK	b0901	putative NAD(P)H-dependent oxidoreductase	30	23	62	33	48	1.29167	1	0.724536	0.0982115	0.0182322	0.499604	0.784982	0.464709	1	1	0.536195	0.0182322
2056816	2056858	2057574	2057574	+	yeeN	b1983	UPF0082 family protein	93	104	63	56	48	1.3125	1	0.482845	0.230238	0.449743	0.809864	0.018266	0.938186	1	1	0.027902	0.018266
	25207	25701	25701	+	lspA	b0027	prolipoprotein signal peptidase (signal peptidase II)	104	156	67	105	73	0.917808	1	0.527861	0.0710158	0.634159	0.776466	0.0184399	0.669906	1	1	0.17566	0.0184399
2738394			2738299	-	-	predicted RNA	antisense: pheA	187	200	153	495	264	0.579545	1	0.61331	0.458505	0.0185615	0.500702	0.549934	0.371938	1	1	0.624977	0.0185615
363230	363179	361926	361926	-	lacY	b0343	lactose permease	39	23	70	35	46	1.52174	0.938112	0.175053	0.19697	0.0187512	0.409059	0.85615	0.618603	1	1	0.635785	0.0187512
35376	35371	34781	34361	-	caiE	b0035	stimulator of CaiD and CaiB enzyme activities	31	32	65	35	50	1.3	1	0.723377	0.590309	0.0188742	0.499604	0.770129	0.483417	1	1	0.394565	0.0188742
553100	553100	552591		-	purE	b0523	N5-carboxyaminoimidazole ribonucleotide mutase	175	220	96	144	102	0.941176	1	0.791169	0.0458592	0.565503	0.833224	0.0189547	0.674929	1	1	0.197252	0.0189547
107437			106518	-	-	predicted RNA	antisense: lpxC	481	894	214	676	333	0.642643	1	0.471382	0.0190519	0.124654	0.513239	0.890315	0.831908	1	1	0.707903	0.0190519
3361107	3361176	3361940	3362093	+	gltF	b3214	periplasmic protein	51	50	45	27	36	1.25	1	0.488679	0.465068	0.0463703	0.842614	0.252489	0.533534	1	1	0.0191073	0.0191073
456581	456677	457300	457345	+	clpP	b0437	proteolytic subunit of ClpA-ClpP and ClpX-ClpP ATP-dependent serine proteases	202	214	85	157	118	0.720339	1	0.688618	0.0191309	0.218053	0.98904	0.0923009	0.725498	1	1	0.329308	0.0191309
878240	878248	878631	878631	+	bssR	b0836	repressor of biofilm formation by indole transport regulation	37	35	120	157	112	1.07143	1	0.799823	0.0895785	0.82721	0.46025	0.189111	0.717642	1	1	0.0191617	0.0191617
160634	160604	160149	160149	-	dksA	b0145	transcriptional regulator of rRNA transcription, DnaK suppressor protein	332	381	154	289	171	0.900585	1	0.749824	0.0193476	0.142608	0.796264	0.0238219	0.422346	1	1	0.394565	0.0193476
945582	945557	944931	944906	-	ycaC	b0897	putative isochorismatase family hydrolase	46	33	94	151	107	0.878505	1	0.256084	0.247727	0.374154	0.311568	0.214373	0.644119	1	1	0.0193782	0.0193782
1405751			1405656	-	mcaS	b4426	-	42	26	52	35	45	1.15556	1	0.542377	0.285126	0.0194894	0.51352	0.682465	0.356781	1	1	0.617623	0.0194894
260386	260100	259045	258891	-	phoE	b0241	outer membrane phosphoporin protein E	32	25	59	31	38	1.55263	0.829868	0.225216	0.461465	0.0195246	0.413047	0.688928	0.681817	1	1	0.440169	0.0195246
3131262	3134131	3134823	3135441	+	yghT	b2986	putative ATP-binding protein	36	26	58	31	40	1.45	0.946927	0.949551	0.442754	0.0195246	0.546281	0.801186	0.603384	1	1	0.427519	0.0195246
1622914			1622817	-	mgrR	b4698	-	30	74	80	50	45	1.77778	0.404654	0.767119	0.874876	0.0195561	0.500433	0.128834	0.877818	1	1	0.0460779	0.0195561
157252	156883	156299	156299	-	yadN	b0141	putative fimbrial-like adhesin protein	25	15	44	26	38	1.15789	1	0.501234	0.138639	0.0196002	0.498601	0.41866	0.36501	1	1	0.87939	0.0196002
1643254	1643241	1642489	1641701	-	quuQ	b1559	Qin prophage; putative antitermination protein Q	48	42	90	46	68	1.32353	1	0.212983	0.518816	0.0196049	0.390522	0.88665	0.484572	1	1	0.419055	0.0196049
2447507	2447473	2446388	2446388	-	aroC	b2329	chorismate synthase	142	171	69	116	78	0.884615	1	0.820652	0.0197627	0.239831	0.954814	0.0355314	0.577992	1	1	0.338139	0.0197627
	4530533	4530255	4530244	-	sgcB	b4565	putative enzyme IIB component of PTS	42	40	71	41	57	1.24561	1	0.502048	0.47767	0.0197928	0.499604	0.817331	0.485385	1	1	0.339474	0.0197928
4115713			4115670	-	-	predicted RNA	-	243	296	194	655	273	0.710623	1	0.604541	0.387898	0.0197928	0.502928	0.345195	0.0225103	1	1	0.742851	0.0197928
1531816	1531816	1532952	1533014	+	ydcC	b1460	H repeat-associated putative transposase	29	27	72	37	38	1.89474	0.392438	0.0601803	0.302483	0.019812	0.397177	0.585697	0.857253	1	1	0.482227	0.019812
2382711	2382713	2383924	2384849	+	elaD	b2269	protease, capable of cleaving an AMC-ubiquitin model substrate	32	25	65	33	42	1.54762	0.911914	0.166302	0.341589	0.0198425	0.401256	0.89357	0.648573	1	1	0.465008	0.0198425
1640369	1640365	1640054		-	ydfR	b1555	Qin prophage; uncharacterized protein	33	36	55	33	37	1.48649	0.645563	0.501325	0.722589	0.0198587	0.501111	0.397001	0.719528	1	1	0.242544	0.0198587
2151132	2151185	2151646	2151764	+	yegJ	b2071	uncharacterized protein	42	29	81	44	53	1.5283	0.82418	0.703511	0.210956	0.0199655	0.504157	0.918733	0.667883	1	1	0.680616	0.0199655
4324376	4324352	4323336	4322978	-	phnD	b4105	phosphonate ABC transporter periplasmic binding protein	37	24	58	30	30	1.93333	0.348548	0.277904	0.453743	0.0201606	0.611278	0.5198	0.893056	1	1	0.441939	0.0201606
2473967	2474032	2474856	2474859	+	yfdQ	b2360	CPS-53 (KpLE1) prophage; uncharacterized protein	26	23	45	25	31	1.45161	0.938112	0.675656	0.662235	0.0201624	0.511465	0.550763	0.618603	1	1	0.383622	0.0201624
1095843	1095843	1096829	1097680	+	ycdU	b1029	putative inner membrane protein	43	30	84	42	58	1.44828	1	0.177113	0.273829	0.0202002	0.395905	0.928305	0.577743	1	1	0.507341	0.0202002
1947378	1947376	1946855	1946855	-	ruvC	b1863	component of RuvABC resolvasome, endonuclease	80	134	69	83	63	1.09524	1	0.483687	0.158779	0.935663	0.443227	0.0203692	0.794837	1	1	0.0981072	0.0203692
3444097	3444097	3442766	3442766	-	secY	b3300	preprotein translocase membrane subunit	1521	2319	315	972	521	0.604607	1	0.850076	0.0204389	0.791516	0.460037	0.886372	0.837406	1	1	0.918681	0.0204389
80020			80109	+	-	predicted RNA	antisense: leuC	380	514	171	466	342	0.5	1	0.937004	0.0204389	0.0939214	0.481427	0.194504	0.776407	1	1	0.339474	0.0204389
	755907	757673	757673	+	sdhA	b0723	succinate dehydrogenase, flavoprotein subunit	264	438	107	194	147	0.727891	1	0.767119	0.0205502	0.554299	0.480943	0.602966	0.776407	1	1	0.471529	0.0205502
1523276	1523307	1524368	1524394	+	yncE	b1452	ATP-binding protein, periplasmic, function unknown	133	183	74	149	106	0.698113	1	0.8551	0.0205684	0.0848485	0.492121	0.252407	0.655174	1	1	0.459129	0.0205684
	4320663	4319599		-	phnI	b4099	ribophosphonate triphosphate synthase complex putative catalytic subunit	13	18	42	22	22	1.90909	0.341341	0.798172	0.396155	0.0205842	0.497557	0.525359	0.897808	1	1	0.447032	0.0205842
2814882	2814733	2814218	2813725	-	luxS	b2687	S-ribosylhomocysteine lyase	224	215	98	253	139	0.705036	1	0.769757	0.060676	0.02069	0.925019	0.185571	0.293933	1	1	0.97927	0.02069
329341	329334	328747	328734	-	betI	b0313	choline-inducible betIBA-betT divergent operon transcriptional repressor	54	87	53	49	41	1.29268	1	0.480669	0.277717	0.441707	0.712833	0.0209061	0.893056	1	1	0.0407148	0.0209061
956641	956632	954872	954829	-	ycaO	b0905	ribosomal protein S12 methylthiotransferase accessory factor	66	96	51	45	43	1.18605	1	0.438979	0.141072	0.640085	0.807935	0.0209484	0.971154	1	1	0.0329247	0.0209484
335030	335280	335885	335924	+	yahD	b0318	ankyrin repeat protein	37	29	63	34	42	1.5	0.905409	0.658565	0.464842	0.0211124	0.517242	0.713276	0.645451	1	1	0.422339	0.0211124
2255252	2255355	2256014	2256570	+	yeiL	b2163	putative transcriptional regulator	29	25	55	30	38	1.44737	0.938112	0.698071	0.417456	0.0211124	0.504157	0.81736	0.61562	1	1	0.42552	0.0211124
3190632	3190632	3191696	3192207	+	yqiI	b3048	fimbrial protein	41	32	69	36	48	1.4375	1	0.228019	0.536405	0.0211124	0.419456	0.745155	0.586941	1	1	0.420061	0.0211124
1326752	1326852	1327727	1327727	+	rluB	b1269	23S rRNA pseudouridine(2605) synthase	98	166	86	77	81	1.06173	1	0.409371	0.116025	0.63932	0.500554	0.0420746	0.890886	1	1	0.0211698	0.0211698
925971			925884	-	serW	b0883	Ser tRNA	80	93	65	57	47	1.38298	0.957184	0.583145	0.344701	0.21321	0.827012	0.0406157	0.995528	1	1	0.0214106	0.0214106
1067110	1067091	1066864	1066860	-	yccJ	b1003	uncharacterized protein	89	75	144	332	217	0.663594	1	0.676726	0.557535	0.110258	0.756996	0.312095	0.578054	1	1	0.0214965	0.0214965
1908548	1908548	1908261	1908205	-	yebO	b1825	putative inner membrane protein	57	140	93	100	67	1.38806	0.913974	0.515535	0.340068	0.638625	0.502177	0.0216657	0.666296	1	1	0.170691	0.0216657
712908	712987	713532	713557	+	seqA	b0687	negative modulator of initiation of replication	138	176	68	128	85	0.8	1	0.95374	0.0218527	0.270958	1	0.0277152	0.59902	1	1	0.271539	0.0218527
3311254	3311168	3309033	3308925	-	pnp	b3164	polynucleotide phosphorylase/polyadenylase	305	548	116	257	165	0.70303	1	0.776658	0.0219204	0.758574	0.492121	0.821287	0.828895	1	1	0.88765	0.0219204
117708	117549	117109	117109	-	ppdD	b0108	putative prepilin peptidase-dependent pilin	41	22	71	40	64	1.10938	1	0.698599	0.0747791	0.0219241	0.500554	0.218292	0.273882	1	1	0.981018	0.0219241
	3594206	3593439	3593439	-	livG	b3455	leucine/isoleucine/valine transporter subunit	153	185	76	117	87	0.873563	1	0.965462	0.022174	0.444492	0.889621	0.0250671	0.71805	1	1	0.200636	0.022174
4332009	4332116	4332205	4332219	+	pmrR	b4703	putative membrane-bound BasS regulator	80	98	74	59	65	1.13846	1	0.579766	0.452859	0.111619	0.617529	0.187457	0.701788	1	1	0.022283	0.022283
	3337256	3336963	3336804	-	mlaB	b3191	ABC transporter maintaining OM lipid asymmetry, cytoplasmic STAS component	106	133	66	96	64	1.03125	1	0.644207	0.209696	0.92656	0.784047	0.0223044	0.659257	1	1	0.175726	0.0223044
4411302	4411302	4411961	4411978	+	yjfK	b4183	DUF2491 family protein	40	27	63	35	45	1.4	1	0.552354	0.379323	0.0224266	0.611695	0.926103	0.60543	1	1	0.450291	0.0224266
1244586	1244527	1243793	1243145	-	ycgR	b1194	flagellar velocity braking protein, c-di-GMP-regulated	425	261	106	158	121	0.876033	1	0.14008	0.0225729	0.4234	0.264814	0.0476735	0.756272	1	1	0.243331	0.0225729
3719447	3719478	3719768	3719904	+	yiaG	b3555	HTH_CROC1 family putative transcriptional regulator	66	62	143	276	244	0.586066	1	0.716234	0.397649	0.218693	0.790772	0.0488275	0.883917	1	1	0.0226356	0.0226356
1141168	1144502	1144822	1144846	+	yceQ	b1085	uncharacterized protein	71	142	64	119	68	0.941176	1	0.623484	0.14819	0.517958	0.554569	0.0228053	0.484572	1	1	0.280203	0.0228053
2709436	2709404	2708754		-	rseA	b2572	anti-sigma factor	164	285	173	460	246	0.703252	1	0.324815	0.253761	0.0228183	0.371141	0.610502	0.581833	1	1	0.465249	0.0228183
3433670	3433690	3434199	3434213	+	def	b3287	peptide deformylase	132	219	88	186	116	0.758621	1	0.483512	0.022838	0.120424	0.443227	0.0554662	0.515098	1	1	0.427519	0.022838
2476584			2476598	+	pawZ	b4643	Xaa tRNA	28	32	63	35	43	1.46512	0.404654	0.751292	0.0229028	1	0.721967	0.729757	1	1	1	1	0.0229028
3151870			3151899	+	-	predicted RNA	antisense: exbB	313	576	201	419	282	0.712766	1	0.620408	0.0229191	0.39636	0.546216	0.0297114	0.740674	1	1	0.118707	0.0229191
900617	900575	899844	899755	-	artJ	b0860	arginine binding protein, periplasmic	341	218	157	140	99	1.58586	0.81891	0.516306	0.323008	0.680044	0.233756	0.0233337	0.648573	1	1	0.243331	0.0233337
3035182	3035174	3033657	3033057	-	lysS	b2890	lysine tRNA synthetase, constitutive	219	327	97	165	116	0.836207	1	0.755909	0.0234949	0.339301	0.503879	0.218571	0.779199	1	1	0.412512	0.0234949
2316161	2316177	2316827	2316834	+	rcsB	b2217	response regulator in two-component regulatory system with RcsC and YojN	199	253	105	194	132	0.795455	1	0.955559	0.0234949	0.158068	0.682347	0.0903938	0.599501	1	1	0.388687	0.0234949
3800965	3800965	3800267	3800267	-	waaY	b3625	lipopolysaccharide core biosynthesis protein	32	50	38	36	24	1.58333	0.604373	0.629717	0.424057	0.413705	0.896456	0.0236267	0.664893	1	1	0.176843	0.0236267
	3432464	3431991	3431991	-	smg	b3284	DUF494 family putative periplasmic protein	139	184	90	236	130	0.692308	1	0.49909	0.108835	0.0236917	0.432899	0.221206	0.294169	1	1	0.981018	0.0236917
1089865	1089857	1087839		-	pgaB	b1023	poly-beta-1,6-N-acetyl-D-glucosamine (PGA) N-deacetylase outer membrane export lipoprotein	31	23	63	31	42	1.5	0.860248	0.0413019	0.224953	0.0237907	0.369245	0.885832	0.63009	1	1	0.57645	0.0237907
4308488	4308478	4307783		-	alsE	b4085	allulose-6-phosphate 3-epimerase	42	34	70	37	51	1.37255	1	0.325226	0.583002	0.0237907	0.470026	0.696925	0.565665	1	1	0.412999	0.0237907
2173362			2173078	-	-	predicted RNA	-	288	273	225	548	309	0.728155	1	0.453007	0.356786	0.0237907	0.443227	0.738679	0.337193	1	1	0.371248	0.0237907
2621184	2621197	2622234		+	purM	b2499	phosphoribosylaminoimidazole synthetase	281	384	128	231	163	0.785276	1	0.50697	0.0237953	0.233784	0.731215	0.309525	0.717642	1	1	0.489747	0.0237953
4092855	4092823	4092377	4092377	-	frvA	b3900	putative enzyme IIA component of PTS	32	21	49	29	42	1.16667	1	0.517852	0.256279	0.0239207	0.500697	0.714916	0.425857	1	1	0.62355	0.0239207
4289201	4289245	4289811		+	nrfB	b4071	nitrite reductase, formate-dependent, penta-heme cytochrome c	41	33	52	30	46	1.13043	1	0.619311	0.927747	0.0239388	0.528321	0.626545	0.333846	1	1	0.293353	0.0239388
765984	765984	767960	767977	+	mngA	b0731	fused 2-O-a-mannosyl-D-glycerate specific PTS enzymes: IIA component/IIB component/IIC component	62	24	93	71	101	0.920792	1	0.222606	0.0458592	0.343197	0.333552	0.023943	0.568339	1	1	0.2182	0.023943
2599773	2599760	2598882	2598875	-	dapA	b2478	dihydrodipicolinate synthase	255	313	121	267	161	0.751553	1	0.635794	0.0240169	0.0719926	0.708929	0.290778	0.552446	1	1	0.977484	0.0240169
4556867	4556993	4557385	4557595	+	iraD	b4326	RpoS stabilzer after DNA damage, anti-RssB factor	26	27	47	28	35	1.34286	0.82418	0.490745	0.494445	0.0240235	0.498601	0.616218	0.621799	1	1	0.334765	0.0240235
	3456377	3458329	3458329	+	gspD	b3325	general secretory pathway component, cryptic	69	37	75	58	88	0.852273	1	0.350102	0.319121	0.0240235	0.394993	0.270277	0.484572	1	1	0.850179	0.0240235
4201720	4201688	4201263	4200936	-	zraP	b4002	Zn-dependent periplasmic chaperone	39	25	64	38	37	1.72973	0.392438	0.515262	0.231425	0.0241346	0.563368	0.814522	0.87977	1	1	0.685888	0.0241346
	301887	300931		-	paoB	b0285	PaoABC aldehyde oxidoreductase, FAD-containing subunit	69	18	74	62	55	1.34545	1	0.323713	0.0241686	0.471039	0.494862	0.266776	0.917384	1	1	0.210552	0.0241686
2537324	2537342	2537716	2537716	+	yfeK	b2419	uncharacterized protein	26	22	42	25	24	1.75	0.404654	0.507276	0.10709	0.0242537	0.556182	0.495242	0.883376	1	1	0.413891	0.0242537
4404386	4404386	4404583	4404681	+	yjeT	b4176	DUF2065 family protein	42	37	72	44	42	1.71429	0.428265	0.498689	0.312125	0.0242537	0.511465	0.603994	0.867098	1	1	0.46016	0.0242537
4399977			4399887	-	-	predicted RNA	antisense: miaA	314	434	153	488	243	0.62963	1	0.635007	0.0378454	0.0242537	0.831272	0.0774887	0.241625	1	1	0.429111	0.0242537
1311809	1314020	1314658	1314877	+	ompW	b1256	outer membrane protein W	31	25	58	32	63	0.920635	1	0.698764	0.339731	0.0242537	0.498601	0.48355	0.0582385	1	1	0.453362	0.0242537
	1634885	1634310	1634152	-	tfaQ	b1546	Qin prophage; putative tail fiber assembly protein	52	104	157	119	114	1.37719	1	0.0243081	0.951654	0.367468	0.264814	0.487986	0.981859	1	1	0.472901	0.0243081
1051732	1051847	1052077		+	ymcE	b0991	cold shock gene	50	88	69	51	58	1.18966	1	0.52635	0.467253	0.101858	0.501111	0.133857	0.755359	1	1	0.0245392	0.0245392
573871	573956	574339	576858	+	quuD	b0551	DLP12 prophage; putative antitermination protein	33	31	66	40	48	1.375	0.911914	0.483512	0.3546	0.0246005	0.498604	0.855553	0.627811	1	1	0.42516	0.0246005
4107499	4107552	4108514	4108704	+	pfkA	b3916	6-phosphofructokinase I	184	204	83	136	102	0.813725	1	0.626324	0.0246916	0.270968	0.99642	0.104368	0.733742	1	1	0.339474	0.0246916
	4318764	4318006	4317903	-	phnK	b4097	carbon-phosphorus lyase complex subunit, putative ATP transporter ATP-binding protein	18	22	53	29	27	1.96296	0.28753	0.7962	0.358974	0.0247	0.498601	0.511946	0.951887	1	1	0.451347	0.0247
1645880	1645897	1646202	1646223	+	ydfV	b1565	Qin prophage; uncharacterized protein	24	37	54	33	34	1.58824	0.565394	0.468074	0.781692	0.0248364	0.498079	0.364743	0.798994	1	1	0.239213	0.0248364
890759	890753	890496	890444	-	grxA	b0849	glutaredoxin 1, redox coenzyme for ribonucleotide reductase (RNR1a)	41	33	57	35	43	1.32558	0.708628	0.522456	0.418581	0.0248364	0.509211	0.632405	0.613208	1	1	0.358207	0.0248364
3263673	3263660	3262452	3262419	-	tdcD	b3115	propionate kinase/acetate kinase C, anaerobic	25	25	45	24	31	1.45161	1	0.270531	0.854761	0.0249001	0.435127	0.533422	0.59902	1	1	0.35287	0.0249001
1692851	1692851	1691586	1691367	-	uidC	b1615	putative outer membrane porin for beta-glucuronides porin protein	34	28	77	38	64	1.20312	1	0.0743595	0.274985	0.0249426	0.274319	0.623963	0.344053	1	1	0.509477	0.0249426
3725326	3725318	3724407	3724398	-	glyQ	b3560	glycine tRNA synthetase, alpha subunit	207	223	91	135	105	0.866667	1	0.55054	0.0250212	0.416771	0.775009	0.06756	0.776407	1	1	0.260968	0.0250212
	1036354	1036752		+	hyaE	b0976	putative HyaA chaperone	37	25	68	40	56	1.21429	1	0.501234	0.178696	0.0250473	0.499604	0.553033	0.46764	1	1	0.817456	0.0250473
3946872			3946948	+	aspT	b3760	Asp tRNA	100	172	97	103	108	0.898148	1	0.576433	0.313891	0.385233	0.502971	0.14774	0.776494	1	1	0.0250652	0.0250652
2822707	2822639	2822139	2822014	-	recX	b2698	regulatory protein for RecA	27	28	46	28	29	1.58621	0.552269	0.50697	0.708726	0.0251419	0.512293	0.418252	0.809321	1	1	0.312304	0.0251419
1799031	1798942	1797959	1797954	-	pheS	b1714	phenylalanine tRNA synthetase, alpha subunit	199	296	120	323	146	0.821918	1	0.606609	0.0498215	0.0253093	0.55264	0.282009	0.4257	1	1	0.670921	0.0253093
4352074	4352085	4352357	4352438	+	yjdJ	b4127	putative acyl-CoA transferase	55	52	97	58	58	1.67241	0.44332	0.503157	0.524907	0.0254386	0.510874	0.45831	0.844436	1	1	0.376679	0.0254386
1517202	1517389	1517562	1517638	+	ydcX	b1445	DUF2566 family protein	33	84	71	51	47	1.51064	0.673066	0.472856	0.497876	0.0718648	0.498604	0.080836	0.882121	1	1	0.0256224	0.0256224
4371025	4371025	4372671	4372671	+	groL	b4143	Cpn60 chaperonin GroEL, large subunit of GroESL	605	462	115	289	153	0.751634	1	0.255584	0.0258684	0.242212	0.824952	0.478236	0.828895	1	1	0.709899	0.0258684
3800219	3800196	3799345	3799313	-	waaZ	b3624	lipopolysaccharide core biosynthesis protein	25	41	37	29	20	1.85	0.328706	0.653891	0.483873	0.225106	0.827862	0.0259045	0.681754	1	1	0.175998	0.0259045
1720860	1720824	1720390	1719798	-	slyA	b1642	global transcriptional regulator	121	171	74	148	83	0.891566	1	0.541029	0.0726901	0.247174	0.813809	0.0260629	0.412053	1	1	0.352786	0.0260629
2814802			2814879	+	micA	b4442	-	143	195	87	172	94	0.925532	1	0.638774	0.179063	0.583069	0.982606	0.0260629	0.491237	1	1	0.241496	0.0260629
3726071	3725712	3725413	3725327	-	ysaB	b4553	uncharacterized protein	47	44	82	50	53	1.54717	0.609681	0.502563	0.515219	0.0260831	0.501364	0.490495	0.787053	1	1	0.374256	0.0260831
155426	155426	152829	152829	-	htrE	b0139	putative outer membrane usher protein	21	19	47	23	29	1.62069	0.797872	0.0271143	0.274449	0.0260831	0.372059	0.932914	0.703034	1	1	0.481227	0.0260831
3727361	3727361	3726924	3726761	-	yiaA	b3562	YiaAB family inner membrane protein, tandem domains	55	46	75	43	53	1.41509	0.938112	0.617694	0.953977	0.0260831	0.550391	0.49972	0.636069	1	1	0.309281	0.0260831
	3285478	3286269		+	agaD	b3140	N-acetylgalactosamine-specific enzyme IID component of PTS	35	25	57	31	43	1.32558	1	0.382436	0.47767	0.0260831	0.499604	0.888533	0.542784	1	1	0.440169	0.0260831
4457931	4457865	4457314	4456700	-	yjgA	b4234	ribosome-associated UPF0307 family protein	72	121	64	74	58	1.10345	1	0.482845	0.180133	0.85271	0.594809	0.0261305	0.828895	1	1	0.0845364	0.0261305
3515921	3515913	3515077	3515077	-	dam	b3387	DNA adenine methyltransferase	68	106	48	74	51	0.941176	1	0.487002	0.0707902	0.580515	0.591229	0.0261305	0.660283	1	1	0.208373	0.0261305
4262793	4262840	4263082	4263265	+	pspG	b4050	phage shock protein G	36	43	59	37	39	1.51282	0.661969	0.50208	0.876243	0.0261494	0.501807	0.357085	0.765461	1	1	0.197608	0.0261494
4118137	4118090	4117245	4117245	-	glpF	b3927	glycerol facilitator	254	259	198	728	284	0.697183	1	0.821412	0.687371	0.0262163	0.472005	0.673642	0.838685	1	1	0.260644	0.0262163
1866775	1866908	1868842	1868896	+	yeaG	b1783	protein kinase, endogenous substrate unidentified; autokinase	48	48	98	160	118	0.830508	1	0.0371593	0.265098	0.737797	0.0318917	0.166721	0.826824	1	1	0.0263914	0.0263914
2572154	2572050	2571763	2571752	-	eutN	b2456	Ethanolamine catabolic microcompartment shell protein	28	16	50	31	31	1.6129	0.552269	0.491783	0.0418462	0.0264363	0.502177	0.608676	0.826824	1	1	0.788629	0.0264363
2828595	2828621	2828980	2828980	+	srlM	b2706	sorbitol-responsive srl operon transcriptional activator	31	21	50	33	37	1.35135	0.800457	0.508542	0.217519	0.026469	0.501111	0.872711	0.779827	1	1	0.888796	0.026469
2655074	2654933	2654157	2653904	-	sseB	b2522	rhodanase-like enzyme, sulfur transfer from thiosulfate	49	59	38	37	28	1.35714	0.999513	0.525062	0.323008	0.496438	0.753573	0.0268422	0.817115	1	1	0.0968148	0.0268422
2705310	2705309	2704335	2704284	-	lepB	b2568	leader peptidase (signal peptidase I)	97	152	64	107	76	0.842105	1	0.515327	0.0269876	0.291425	0.511465	0.0531255	0.655768	1	1	0.302687	0.0269876
2225640	2225631	2225044	2225044	-	yohC	b2135	Yip1 family inner membrane protein	58	26	97	115	107	0.906542	1	0.259595	0.0631066	0.922725	0.259836	0.0361163	0.950058	1	1	0.0270978	0.0270978
4312100	4312042	4311107	4310990	-	alsB	b4088	D-allose transporter subunit	38	30	67	36	43	1.55814	0.839761	0.237103	0.49228	0.0273326	0.434643	0.643369	0.720937	1	1	0.441939	0.0273326
2850583	2850647	2850997	2850997	+	hypA	b2726	protein involved in nickel insertion into hydrogenases 3	47	26	73	44	49	1.4898	0.724899	0.522831	0.153155	0.0274325	0.510489	0.827934	0.745679	1	1	0.892171	0.0274325
1104903	1104961	1105293	1105293	+	csgC	b1043	curli assembly protein	43	50	67	41	55	1.21818	1	0.513987	0.804726	0.0274325	0.500697	0.470642	0.517028	1	1	0.200799	0.0274325
3754430	3754428	3754105	3754100	-	yiaW	b3587	DUF3302 family inner membrane protein	52	36	75	46	58	1.2931	1	0.531288	0.350136	0.0274325	0.504157	0.939878	0.572679	1	1	0.430283	0.0274325
1779617	1779617	1780381	1780381	+	ydiQ	b1697	putative electron transfer flavoprotein subunit	24	24	51	29	49	1.04082	1	0.725761	0.48623	0.0274325	0.494862	0.822203	0.246694	1	1	0.433533	0.0274325
2894180	2894196	2894771	2897621	+	ygcP	b2768	putative antiterminator regulatory protein	31	27	50	29	39	1.28205	1	0.691429	0.570054	0.0274773	0.502971	0.725019	0.533534	1	1	0.376089	0.0274773
	3513638	3512634	3512557	-	trpS	b3384	tryptophanyl-tRNA synthetase	133	155	65	101	75	0.866667	1	0.890786	0.0275026	0.393983	0.939249	0.0421238	0.710544	1	1	0.253334	0.0275026
	1087846	1086521	1086520	-	pgaC	b1022	biofilm PGA synthase PgaCD, catalytic subunit; poly-beta-1,6-N-acetyl-D-glucosamine synthase; c-di-GMP-stimulated activity and dimerization	40	26	69	35	52	1.32692	1	0.171877	0.298958	0.0275286	0.390522	0.842675	0.515098	1	1	0.503249	0.0275286
2537717	2537749	2538483	2538733	+	yfeS	b2420	WGR domain protein	27	57	58	33	28	2.07143	0.184399	0.70472	0.492717	0.0410685	0.514039	0.0275777	0.908775	1	1	0.0479582	0.0275777
3577646	3577592	3577065	3577065	-	gntK	b3437	gluconate kinase 2	41	32	61	35	46	1.32609	1	0.654163	0.567264	0.0276363	0.515598	0.721043	0.550995	1	1	0.393332	0.0276363
535710	535710	536486	536531	+	hyi	b0508	hydroxypyruvate isomerase	44	26	69	37	52	1.32692	1	0.285498	0.300601	0.0280741	0.411166	0.857705	0.522807	1	1	0.511959	0.0280741
218779	218775	217057	217057	-	proS	b0194	prolyl-tRNA synthetase	206	250	81	158	105	0.771429	1	0.57987	0.0280911	0.224086	0.494756	0.357142	0.870216	1	1	0.784292	0.0280911
4403298	4403300	4404304	4404337	+	hflC	b4175	modulator for HflB protease specific for phage lambda cII repressor	191	226	93	172	111	0.837838	1	0.705901	0.0282291	0.120424	0.643913	0.15389	0.527532	1	1	0.465249	0.0282291
4022215	4022218	4022733	4022733	+	tatB	b3838	TatABCE protein translocation system subunit	147	204	87	137	99	0.878788	1	0.638163	0.038809	0.494827	0.824952	0.0283418	0.70946	1	1	0.211245	0.0283418
4310980	4310980	4309448		-	alsA	b4087	fused D-allose transporter subunits of ABC superfamily: ATP-binding components	34	29	60	31	39	1.53846	0.890751	0.164151	0.527164	0.028945	0.409059	0.640643	0.701802	1	1	0.423764	0.028945
	1181267	1180479	1175479	-	ycfZ	b1121	inner membrane protein	36	32	68	37	61	1.11475	1	0.305904	0.550545	0.0293539	0.425981	0.937284	0.311304	1	1	0.427933	0.0293539
2259296	2259296	2258355		-	psuK	b2166	pseudouridine kinase	25	27	56	30	46	1.21739	1	0.530552	0.590309	0.0293584	0.682873	0.946963	0.429205	1	1	0.422498	0.0293584
3793986	3793987	3794919	3794928	+	hldD	b3619	ADP-L-glycero-D-mannoheptose-6-epimerase, NAD(P)-binding	164	190	80	133	92	0.869565	1	0.822369	0.0294408	0.258712	1	0.0592914	0.619864	1	1	0.34827	0.0294408
2076761	2076817	2077038	2077038	+	yeeT	b2003	CP4-44 prophage; uncharacterized protein	40	31	63	40	59	1.0678	1	0.507074	0.298586	0.0296047	0.494862	0.77081	0.389986	1	1	0.529077	0.0296047
515914	515919	516596		+	fetA	b0490	iron exporter, ATP-binding subunit, ABC transporter FetAB subunit; peroxide resistance protein	37	32	59	33	43	1.37209	1	0.834221	0.735819	0.0296047	0.553545	0.569922	0.577992	1	1	0.388603	0.0296047
3851092	3851092	3850802	3850802	-	ilvN	b3670	acetolactate synthase 1 small subunit	171	188	83	124	91	0.912088	1	0.858399	0.117596	0.845889	0.71779	0.0297178	0.787137	1	1	0.118707	0.0297178
3574888	3574878	3573775	3573503	-	asd	b3433	aspartate-semialdehyde dehydrogenase, NAD(P)-binding	527	681	173	346	534	0.32397	0.630278	0.769428	0.0297453	0.376531	0.712833	0.655953	0.825307	1	1	0.903996	0.0297453
2635883	2635814	2635599	2635170	-	yfgJ	b2510	DUF1407 family protein	44	88	54	57	44	1.22727	1	0.539687	0.347359	0.42496	0.510489	0.0298881	0.840601	1	1	0.0595824	0.0298881
1755685	1755698	1757110	1757123	+	pykF	b1676	pyruvate kinase I	222	261	91	178	127	0.716535	1	0.421433	0.0299486	0.184376	0.597262	0.478236	0.861705	1	1	0.789968	0.0299486
4620877	4620883	4621602	4621614	+	deoD	b4384	purine-nucleoside phosphorylase	177	187	79	108	91	0.868132	1	0.757018	0.0299684	0.681627	0.699253	0.0299918	0.831908	1	1	0.117162	0.0299684
1792233	1792020	1791307	1791245	-	ydiV	b1707	anti-FlhD4C2 factor, inactive EAL family phosphodiesterase	35	39	58	32	38	1.52632	0.865686	0.839686	0.815276	0.0299804	0.548131	0.435452	0.715938	1	1	0.263894	0.0299804
2777433	2777453	2777782	2777971	+	ypjF	b2646	CP4-57 prophage; toxin of the YpjF-YfjZ toxin-antitoxin system	34	22	44	28	43	1.02326	1	0.532724	0.310836	0.0299804	0.499604	0.756295	0.311304	1	1	0.488606	0.0299804
246239	246239	245961	245858	-	yafQ	b0225	translation inhibitor toxin of toxin-antitoxin pair YafQ/DinJ	43	132	65	99	65	1	1	0.516016	0.212825	0.865573	0.498601	0.0305319	0.651333	1	1	0.200919	0.0305319
1302814	1302899	1303819	1303833	+	oppB	b1244	oligopeptide transporter subunit	220	227	94	176	118	0.79661	1	0.492757	0.0308016	0.121002	0.941778	0.181848	0.578054	1	1	0.456475	0.0308016
943404	943414	944031	944032	+	dmsB	b0895	dimethyl sulfoxide reductase, anaerobic, subunit B	28	27	60	34	58	1.03448	1	0.734087	0.442754	0.0310195	0.492675	0.775395	0.229107	1	1	0.433671	0.0310195
1802638	1802570	1800642	1800642	-	thrS	b1719	threonyl-tRNA synthetase	364	578	128	342	181	0.707182	1	0.781301	0.0311534	0.297668	0.490958	0.895932	0.831908	1	1	0.725641	0.0311534
2823785	2823769	2822708	2822708	-	recA	b2699	DNA recombination and repair protein; ssDNA-dependent ATPase; synaptase; ssDNA and dsDNA binding protein forming filaments; ATP-dependent homologous DNA strand exchanger; recombinase A; LexA autocleavage cofactor	162	229	94	170	114	0.824561	1	0.817874	0.0312732	0.135872	0.508968	0.187457	0.56683	1	1	0.469947	0.0312732
1409129			1409250	+	fnrS	b4699	-	40	37	70	45	49	1.42857	0.773378	0.494125	0.291498	0.0313175	0.500963	0.932914	0.729084	1	1	0.5497	0.0313175
2178625	2178564	2177512	2177363	-	fbaB	b2097	fructose-bisphosphate aldolase class I	73	71	107	256	143	0.748252	1	0.227517	0.756639	0.0485635	0.191622	0.343579	0.565665	1	1	0.0314503	0.0314503
691785	691784	690906	690900	-	ybeX	b0658	putative ion transport	186	313	124	238	167	0.742515	1	0.530552	0.0314538	0.126953	0.475776	0.348557	0.63197	1	1	0.647774	0.0314538
3055587	3055612	3055941	3055982	+	zapA	b2910	FtsZ stabilizer	208	319	132	311	183	0.721311	1	0.507917	0.0315543	0.0560301	0.442299	0.0932374	0.425857	1	1	0.642813	0.0315543
636569	636569	635349		-	ybdN	b0602	PAPS reductase-like domain protein	37	22	63	34	39	1.61538	0.788423	0.222825	0.267058	0.0315725	0.441987	0.947371	0.774185	1	1	0.590143	0.0315725
1789613	1789613	1789804	1789824	+	ydiE	b1705	hemin uptake protein HemP homolog	58	119	60	81	63	0.952381	1	0.567111	0.25415	0.813374	0.510402	0.0316067	0.826853	1	1	0.0840507	0.0316067
853032	852997	852869	852800	-	mntS	b4705	Mn(2)-response protein, MntR-repressed	95	293	179	518	268	0.66791	1	0.487609	0.309341	0.0316275	0.461182	0.390542	0.273307	1	1	0.984391	0.0316275
	2893919	2894179	2894179	+	ygcO	b2767	putative 4Fe-4S cluster-containing protein	36	29	56	35	51	1.09804	1	0.507897	0.334428	0.0317464	0.497337	0.898439	0.438878	1	1	0.453362	0.0317464
3927141	3927155	3928147	3928147	+	asnA	b3744	asparagine synthetase A	78	137	164	118	137	1.19708	1	0.0319485	0.506671	0.249611	0.289599	0.920083	0.732358	1	1	0.471322	0.0319485
1491506			1491443	-	rydC	b4597	-	50	79	71	55	49	1.44898	0.845378	0.517155	0.49228	0.100315	0.588219	0.0903938	0.897651	1	1	0.032051	0.032051
3994504	3994522	3994725	3994761	+	yifL	b4558	putative lipoprotein	115	148	74	97	77	0.961039	1	0.662145	0.234492	0.82721	0.74886	0.0322225	0.831908	1	1	0.0887375	0.0322225
4325748	4325741	4325298	4325293	-	yjdN	b4107	metalloprotein superfamily protein	25	21	75	80	65	1.15385	1	0.43617	0.032278	0.680452	0.466212	0.145308	0.870649	1	1	0.057536	0.032278
1872041	1872041	1873531	1873571	+	yeaJ	b1786	putative diguanylate cyclase	23	25	43	24	32	1.34375	1	0.217716	0.868624	0.0323477	0.390522	0.550853	0.548685	1	1	0.35534	0.0323477
1226492	1226600	1226968	1227025	+	ycgJ	b1177	uncharacterized protein	33	45	76	46	44	1.72727	0.428265	0.46926	0.76446	0.0325081	0.499604	0.396933	0.892117	1	1	0.339474	0.0325081
	4309469	4308489	4308489	-	alsC	b4086	D-allose transporter subunit	48	30	66	36	50	1.32	1	0.286848	0.517645	0.0325816	0.439898	0.900006	0.544261	1	1	0.441224	0.0325816
3708692			3708616	-	proK	b3545	Pro tRNA	22	30	33	30	25	1.32	1	0.512034	0.898109	0.0326988	0.510402	0.501542	0.547933	1	1	0.0574883	0.0326988
1102545	1102541	1102152	1102128	-	csgE	b1039	curlin secretion specificity factor	24	23	50	31	39	1.28205	0.946927	0.477505	0.280595	0.0327274	0.494756	0.937035	0.60435	1	1	0.595274	0.0327274
1855980	1855971	1854991	1854858	-	ydjG	b1771	alpha-Keto reductase, NADH-dependent; can use methylglyoxal as substrate	31	26	58	32	51	1.13725	1	0.250893	0.525666	0.0328639	0.385894	0.904392	0.344053	1	1	0.440169	0.0328639
1224545	1224545	1224279	1224223	-	minE	b1174	cell division topological specificity factor	141	170	77	148	84	0.916667	1	0.63856	0.141893	0.442591	0.820711	0.0328937	0.484572	1	1	0.304893	0.0328937
2560257	2560257	2560898	2561237	+	yffL	b2443	CPZ-55 prophage; uncharacterized protein	40	29	68	38	45	1.51111	0.913974	0.507917	0.437548	0.032921	0.616214	0.761881	0.707426	1	1	0.451025	0.032921
	573371	573733		+	rusA	b0550	DLP12 prophage; endonuclease RUS	46	27	66	41	69	0.956522	1	0.53062	0.22445	0.032921	0.499604	0.35417	0.152034	1	1	0.751656	0.032921
683470	683393	681723	680625	-	hscC	b0650	Hsp70 family chaperone Hsc62, binds to RpoD and inhibits transcription	32	23	57	29	48	1.1875	1	0.144769	0.33773	0.032959	0.348068	0.721878	0.371443	1	1	0.478445	0.032959
3496880	3497003	3497809	3497809	+	nirC	b3367	nitrite transporter	36	24	51	28	43	1.18605	1	0.390357	0.537898	0.0330521	0.466212	0.991673	0.425857	1	1	0.429111	0.0330521
4264303	4264314	4265729	4265729	+	dnaB	b4052	replicative DNA helicase	77	121	62	67	56	1.10714	1	0.423845	0.12283	0.994732	0.568349	0.0332051	0.831908	1	1	0.132838	0.0332051
1310275	1310269	1309016	1308804	-	kch	b1250	voltage-gated potassium channel	25	31	62	33	46	1.34783	1	0.0759591	0.645782	0.0332091	0.279745	0.754507	0.552446	1	1	0.406642	0.0332091
958575			957607	-	-	predicted RNA	antisense: serC	630	711	188	550	341	0.55132	1	0.888616	0.0333935	0.140942	0.48379	0.787295	0.828895	1	1	0.707413	0.0333935
1580790	1580790	1579633	1579546	-	ydeM	b1497	putative YdeN-specific sulfatase-maturating enzyme	22	26	54	29	40	1.35	1	0.303137	0.609573	0.0334303	0.651676	0.764238	0.565665	1	1	0.420932	0.0334303
1232241	1230394	1229483	1229477	-	hlyE	b1182	hemolysin E	27	26	61	33	46	1.32609	1	0.380503	0.431171	0.0334817	0.669525	0.97984	0.552446	1	1	0.461686	0.0334817
1049767	1049744	1049439	1049439	-	gfcA	b0987	O-antigen capsule production threonine-rich inner membrane protein	42	43	61	38	60	1.01667	1	0.520354	0.997136	0.0334817	0.499604	0.657324	0.273882	1	1	0.239213	0.0334817
1370195	1370216	1371895	1371908	+	ycjM	b1309	alpha amylase catalytic domain family protein	22	21	55	29	37	1.48649	0.938112	0.0415888	0.285715	0.0334865	0.359866	0.996773	0.691482	1	1	0.529849	0.0334865
2899487	2899418	2897964	2897871	-	ygcU	b4463	putative FAD-containing dehydrogenase	29	25	54	29	42	1.28571	1	0.196687	0.545392	0.0336218	0.390522	0.909319	0.52183	1	1	0.429111	0.0336218
4635481	4635521	4635994	4636006	+	creA	b4397	putative periplasmic protein	54	50	64	38	42	1.52381	0.740117	0.667266	0.590423	0.033804	0.983441	0.32427	0.776407	1	1	0.172096	0.033804
1209605	1209119	1208517	1208387	-	tfaE	b1156	e14 prophage; putative tail fiber assembly protein	23	24	45	27	36	1.25	1	0.490499	0.531191	0.0338158	0.498601	0.81871	0.526572	1	1	0.392323	0.0338158
1279716	1279864	1283607		+	narG	b1224	nitrate reductase 1, alpha subunit	28	20	58	33	53	1.09434	1	0.0338346	0.127572	0.167996	0.214441	0.187819	0.484572	1	1	0.725094	0.0338346
2038933	2038956	2039369	2039477	+	hiuH	b1970	hydroxyisourate hydrolase	17	20	38	24	25	1.52	0.661969	0.472821	0.346627	0.034045	0.498029	0.728453	0.783611	1	1	0.441224	0.034045
1454857	1454868	1455155	1455163	+	paaB	b1389	putative ring 1,2-phenylacetyl-CoA epoxidase subunit	47	33	97	59	72	1.34722	0.96348	0.482845	0.113545	0.034045	0.498601	0.55811	0.63009	1	1	0.991869	0.034045
2175053	2175049	2174597	2174577	-	gatA	b2094	galactitol-specific enzyme IIA component of PTS	506	889	402	1531	574	0.700348	1	0.910315	0.334428	0.034045	0.473385	0.758674	0.872968	1	1	0.751656	0.034045
	1285849	1286526	1286590	+	narI	b1227	nitrate reductase 1, gamma (cytochrome b(NR)) subunit	43	19	74	50	72	1.02778	1	0.32186	0.0341778	0.134186	0.409059	0.0637051	0.506897	1	1	0.515724	0.0341778
2084466	2084453	2084226	2084225	-	yeeD	b2012	putative TusA family sulfurtransferase	264	358	180	233	177	1.01695	1	0.490987	0.124629	0.87672	0.777452	0.0342614	0.783119	1	1	0.150926	0.0342614
2136103	2136098	2135655	2135655	-	wzb	b2061	colanic acid production protein-tyrosine-phosphatase; Wzc-P dephosphorylase	31	15	51	36	51	1	1	0.5078	0.0342733	0.0819346	0.497939	0.0554662	0.436834	1	1	0.536774	0.0342733
2300266	2300260	2299565		-	napG	b2205	ferredoxin-type protein essential for electron transfer from ubiquinol to periplasmic nitrate reductase (NapAB)	26	14	50	30	30	1.66667	0.568349	0.709936	0.0343282	0.0427182	0.505039	0.613415	0.844973	1	1	0.751656	0.0343282
1339177	1339160	1338570	1335790	-	ribA	b1277	GTP cyclohydrolase II	97	136	65	95	67	0.970149	1	0.50208	0.102672	0.681922	0.734949	0.0343697	0.70946	1	1	0.201189	0.0343697
1175219	1175165	1174092	1174092	-	ycfT	b1115	inner membrane protein	30	26	62	34	60	1.03333	1	0.179328	0.460489	0.0346274	0.172968	0.693961	0.20263	1	1	0.45857	0.0346274
2356712	2356904	2357803	2357803	+	yfaD	b2244	transposase_31 family protein	29	31	59	32	43	1.37209	1	0.368054	0.747779	0.0346274	0.938181	0.580603	0.586941	1	1	0.397767	0.0346274
	2754298	2754008	2753502	-	ratB	b2618	UPF0125 family protein	52	87	49	57	47	1.04255	1	0.585149	0.299083	0.584191	0.710119	0.0346961	0.87477	1	1	0.063788	0.0346961
3211046	3211107	3212852	3212880	+	dnaG	b3066	DNA primase	84	157	63	79	63	1	1	0.482845	0.0349462	0.655998	0.498601	0.0430677	0.817115	1	1	0.19226	0.0349462
252301	252301	252699	252699	+	yafO	b0233	mRNA interferase toxin of the YafO-YafN toxin-antitoxin system	30	34	58	36	40	1.45	0.724899	0.485469	0.651329	0.0350252	0.499604	0.476775	0.776407	1	1	0.35287	0.0350252
4478473	4478473	4478889	4478901	+	rraB	b4255	protein inhibitor of RNase E	237	310	138	219	154	0.896104	1	0.698599	0.0456516	0.403565	0.927775	0.035544	0.63197	1	1	0.286977	0.035544
246667	246712	247461	247461	+	yafL	b0227	putative lipoprotein and C40 family peptidase	30	22	60	34	50	1.2	1	0.760118	0.237911	0.0355547	0.502971	0.632405	0.465971	1	1	0.697966	0.0355547
3336803	3336803	3336549	3336549	-	ibaG	b3190	acid stress protein; putative transcriptional regulator, BolA family	121	162	69	112	82	0.841463	1	0.659013	0.125037	0.782906	0.957128	0.035587	0.776407	1	1	0.146961	0.035587
	3702868	3701864	3700262	-	dppF	b3540	dipeptide transporter	147	127	80	92	63	1.26984	1	0.920765	0.224533	0.885867	0.497337	0.0358691	0.598582	1	1	0.312512	0.0358691
4215464	4215478	4217079	4217079	+	aceB	b4014	malate synthase A	665	844	365	2158	2651	0.137684	0.412253	0.471165	0.765475	0.179835	0.0358747	0.994985	0.795604	1	0.33189	0.778934	0.0358747
999192	999216	1001816		+	elfC	b0940	putative outer membrane fimbrial subunit export usher protein	31	27	65	33	54	1.2037	1	0.0365001	0.247736	0.0462616	0.332923	0.355279	0.294169	1	1	0.685877	0.0365001
	1342658	1342984	1343233	+	yciH	b1282	initiation factor function partial mimic, SUI1 family	51	65	60	40	47	1.2766	0.946927	0.561322	0.520771	0.0522993	0.633049	0.207278	0.688049	1	1	0.0365287	0.0365287
3543125	3543167	3544045	3544045	+	yhgA	b3411	transposase_31 family protein	42	39	67	37	50	1.34	1	0.274205	0.927747	0.0366255	0.421515	0.540928	0.568667	1	1	0.351874	0.0366255
2388491	2388635	2389057	2389115	+	yfbO	b2274	uncharacterized protein	32	26	66	41	61	1.08197	1	0.483512	0.244696	0.0367925	0.492121	0.546377	0.368424	1	1	0.717462	0.0367925
30817	30817	34038	34069	+	carB	b0033	carbamoyl-phosphate synthase large subunit	362	481	91	121	101	0.90099	1	0.820652	0.036826	0.699528	0.453309	0.164061	0.776407	1	1	0.104277	0.036826
1833354	1833401	1834111	1834115	+	ydjX	b1750	TVP38/TMEM64 family inner membrane protein	43	30	71	40	51	1.39216	1	0.300539	0.410568	0.036896	0.443227	0.925157	0.623518	1	1	0.465035	0.036896
1216068	1216068	1216340	1216340	+	ymgA	b1165	RcsB connector protein for regulation of biofilm	30	25	51	33	32	1.59375	0.604373	0.496486	0.288144	0.0371898	0.502177	0.824422	0.831908	1	1	0.60427	0.0371898
1712765	1712769	1714271	1714371	+	dtpA	b1634	dipeptide and tripeptide permease A	36	39	78	41	62	1.25806	1	0.0372421	0.471733	0.0462238	0.259557	0.946963	0.483432	1	1	0.423764	0.0372421
	373868	374881	375458	+	mhpE	b0352	4-hyroxy-2-oxovalerate/4-hydroxy-2-oxopentanoic acid aldolase, class I	42	31	72	39	61	1.18033	1	0.230436	0.481027	0.0378555	0.390522	0.89213	0.422945	1	1	0.453362	0.0378555
2776869	2776877	2777077	2777114	+	ypjJ	b4548	uncharacterized protein	41	29	57	37	62	0.919355	1	0.523708	0.299083	0.037918	0.494756	0.549788	0.180355	1	1	0.568857	0.037918
2575457	2575457	2574978		-	eutP	b2461	putative P-loop NTPase ethanolamine utilization protein	32	17	57	35	36	1.58333	0.609681	0.503793	0.0419126	0.0380368	0.502472	0.580603	0.828895	1	1	0.757464	0.0380368
1376034	1376034	1376822	1376831	+	ycjR	b1314	putative TIM alpha/beta barrel enzyme	38	24	66	37	57	1.15789	1	0.293516	0.277599	0.0380368	0.405298	0.645024	0.416047	1	1	0.60211	0.0380368
795011	795089	795862		+	modA	b0763	molybdate transporter subunit	113	145	75	75	75	1	1	0.512459	0.114807	0.769531	0.928659	0.0503935	0.940264	1	1	0.0381054	0.0381054
1058024	1058084	1059256		+	torC	b0996	trimethylamine N-oxide (TMAO) reductase I, cytochrome c-type subunit	29	21	54	30	47	1.14894	1	0.222656	0.361234	0.0382715	0.352728	0.756922	0.405892	1	1	0.493853	0.0382715
3206307	3206256	3205324	3204668	-	ttdR	b3060	transcriptional activator of ttdABT	43	37	64	36	51	1.2549	1	0.286848	0.870564	0.0382715	0.425981	0.60016	0.518723	1	1	0.370742	0.0382715
3418342	3418390	3418611	3418622	+	yhdV	b3267	putative outer membrane protein	18	27	34	22	29	1.17241	1	0.708672	0.818244	0.0382715	0.500697	0.527151	0.524749	1	1	0.155098	0.0382715
1420684	1420684	1421106	1421118	+	ydaT	b1358	Rac prophage; uncharacterized protein	22	18	42	27	34	1.23529	0.96348	0.482845	0.240829	0.0387052	0.494756	0.814516	0.610527	1	1	0.747744	0.0387052
2365653	2365620	2365018	2364737	-	ais	b2252	putative LPS core heptose(II)-phosphate phosphatase	43	26	58	34	47	1.23404	1	0.989153	0.364681	0.0387052	0.568349	0.923235	0.515098	1	1	0.462787	0.0387052
1125390	1125326	1124118	1124060	-	mdtH	b1065	multidrug resistance efflux transporter conferring overexpression resistance to norfloxacin and enoxacin	60	26	94	73	104	0.903846	1	0.18701	0.0726398	0.417519	0.214441	0.0387371	0.515098	1	1	0.383622	0.0387371
3477626	3477640	3477858	3477891	+	slyX	b3348	phi X174 lysis protein	49	59	47	37	36	1.30556	0.938112	0.577618	0.483237	0.111923	0.782777	0.138655	0.831908	1	1	0.0388979	0.0388979
106555	106557	107474	107474	+	lpxC	b0096	UDP-3-O-acyl N-acetylglucosamine deacetylase	480	853	218	666	336	0.64881	1	0.471382	0.0390527	0.145494	0.517505	0.81736	0.831908	1	1	0.707413	0.0390527
	2708754	2707798		-	rseB	b2571	anti-sigma E factor, binds RseA	86	164	87	203	115	0.756522	1	0.3575	0.138134	0.0392209	0.401256	0.355324	0.429979	1	1	0.758544	0.0392209
3389126	3389126	3388194	3388189	-	aaeA	b3241	p-hydroxybenzoic acid efflux system component	37	27	58	32	48	1.20833	1	0.284892	0.5796	0.0392504	0.39998	0.947371	0.478211	1	1	0.429789	0.0392504
	748982	747921	747777	-	ybgO	b0716	putative fimbrial protein	28	25	56	31	40	1.4	1	0.239321	0.517645	0.0392611	0.409059	0.846418	0.613208	1	1	0.447838	0.0392611
663975	663963	662752	662643	-	dacA	b0632	D-alanyl-D-alanine carboxypeptidase (penicillin-binding protein 5)	106	136	65	85	65	1	1	0.630987	0.0777821	0.672508	0.901007	0.0395708	0.745679	1	1	0.228899	0.0395708
4538765	4538765	4537659	4537659	-	nanM	b4310	N-acetylneuraminic acid mutarotase	35	33	62	35	43	1.44186	1	0.225251	0.74708	0.0397502	0.410826	0.546377	0.667883	1	1	0.397767	0.0397502
4199504	4199504	4200094	4200206	+	yjaG	b3999	DUF416 domain protein	72	108	58	81	54	1.07407	1	0.501234	0.200324	0.828227	0.719645	0.0400214	0.646956	1	1	0.241496	0.0400214
775846	775849	776277	776277	+	tolR	b0738	membrane spanning protein in TolA-TolQ-TolR complex	46	102	57	66	52	1.09615	1	0.570397	0.257542	0.772086	0.510404	0.0400318	0.831902	1	1	0.108221	0.0400318
2737745	2737745	2738905	2741186	+	pheA	b2599	chorismate mutase and prephenate dehydratase, P-protein	136	171	133	443	232	0.573276	1	0.426061	0.517696	0.0400568	0.281116	0.984341	0.828895	1	0.173596	0.263894	0.0400568
727058	727036	724988	724988	-	kdpB	b0697	potassium translocating ATPase, subunit B	24	17	54	32	38	1.42105	1	0.0403963	0.137777	0.104993	0.351513	0.614657	0.779827	1	1	0.930496	0.0403963
1161615	1161551	1159362	1159331	-	fhuE	b1102	ferric-rhodotorulic acid outer membrane transporter	34	34	70	53	72	0.972222	1	0.0403963	0.307649	0.272337	0.0843045	0.320105	0.524757	1	1	0.834438	0.0403963
1985138	1985069	1983555	1983555	-	araG	b1900	fused L-arabinose transporter subunits of ABC superfamily: ATP-binding components	46	28	91	65	90	1.01111	1	0.0403963	0.136663	0.221205	0.0449724	0.143076	0.515098	1	1	0.545799	0.0403963
1397345	1397365	1397622	1397887	+	ynaJ	b1332	DUF2534 family putative inner membrane protein	124	216	114	181	109	1.04587	1	0.497654	0.208047	0.6583	0.498601	0.0407976	0.527532	1	1	0.304649	0.0407976
2024823	2024823	2024635	2024452	-	dsrB	b1952	uncharacterized protein	24	31	63	41	57	1.10526	1	0.456721	0.280124	0.0408859	0.470469	0.735376	0.46764	1	1	0.658458	0.0408859
1369393	1369393	1369614	1369681	+	pspD	b1307	peripheral inner membrane phage-shock protein	27	21	51	34	34	1.5	0.661969	0.483512	0.170411	0.0410979	0.500554	0.867601	0.817115	1	1	0.938371	0.0410979
117108	117099	115714		-	hofB	b0107	T2SE secretion family protein; P-loop ATPase superfamily protein	32	26	55	30	51	1.07843	1	0.226831	0.542897	0.0410979	0.367612	0.822705	0.2686	1	1	0.438007	0.0410979
2769603	2769703	2770404	2770427	+	yfjR	b2634	CP4-57 prophage; putative DNA-binding transcriptional regulator	35	26	54	31	45	1.2	1	0.973718	0.517148	0.0410979	0.544025	0.965143	0.500193	1	1	0.431703	0.0410979
3640084	3640111	3640545	3640655	+	uspA	b3495	universal stress global response regulator	546	351	155	353	247	0.62753	0.974873	0.195999	0.0419321	0.0412312	0.594111	0.346576	0.641119	1	1	0.780449	0.0412312
	52430	51609	51607	-	rsmA	b0051	16S rRNA m(6)A1518, m(6)A1519 dimethyltransferase, SAM-dependent	109	177	78	131	87	0.896552	1	0.471382	0.0416232	0.282848	0.51271	0.0423943	0.566367	1	1	0.350525	0.0416232
	2569511	2568324	2568108	-	eutG	b2453	ethanol dehydrogenase involved in ethanolamine utilization; aldehyde reductase, converts acetaldehyde to ethanol	21	16	45	25	33	1.36364	1	0.364191	0.276451	0.0416348	0.991377	0.870214	0.61445	1	1	0.627059	0.0416348
998490	998490	999191	999191	+	elfD	b0939	putative periplasmic pilin chaperone	37	27	71	40	61	1.16393	1	0.394269	0.318504	0.0416348	0.738231	0.72623	0.429979	1	1	0.532367	0.0416348
	846463	845741	845735	-	glnQ	b0809	glutamine transporter subunit	110	133	68	112	67	1.01493	1	0.584547	0.119867	0.395353	0.931138	0.0418627	0.488563	1	1	0.400267	0.0418627
1307181	1307150	1306821	1299485	-	yciU	b1248	UPF0263 family protein	75	133	71	115	68	1.04412	1	0.578429	0.237756	0.708985	0.634835	0.0421238	0.524749	1	1	0.301015	0.0421238
194900	194903	195664	195664	+	ispU	b0174	undecaprenyl pyrophosphate synthase	153	260	113	151	126	0.896825	1	0.453421	0.0421285	0.589769	0.480061	0.0801898	0.831908	1	1	0.218849	0.0421285
1268130	1268165	1269019	1269322	+	kdsA	b1215	3-deoxy-D-manno-octulosonate 8-phosphate synthase	155	201	89	164	111	0.801802	1	0.79384	0.0422578	0.143061	0.500315	0.152494	0.595827	1	1	0.429111	0.0422578
3517310	3517306	3516020	3515966	-	damX	b3388	cell division protein that binds to the septal ring	166	224	90	171	113	0.79646	1	0.985439	0.042447	0.143553	0.70855	0.307546	0.61445	1	1	0.747557	0.042447
3328153	3327664	3327035	3326955	-	rlmE	b3179	23S rRNA U2552 2'-O-ribose methyltransferase, SAM-dependent	170	228	101	202	129	0.782946	1	0.671431	0.0424951	0.105098	0.505632	0.11962	0.515098	1	1	0.512497	0.0424951
159126	159126	157729		-	pcnB	b0143	poly(A) polymerase	148	204	82	117	96	0.854167	1	0.896941	0.0424951	0.385273	0.581091	0.19687	0.831908	1	1	0.350657	0.0424951
2495552	2495645	2496565	2496721	+	lpxP	b2378	palmitoleoyl-acyl carrier protein (ACP)-dependent acyltransferase	68	244	104	142	117	0.888889	1	0.20084	0.0425254	0.538035	0.191622	0.125662	0.841069	1	1	0.255603	0.0425254
3348427	3348452	3349084	3349510	+	yrbL	b3207	Mg(2+)-starvation-stimulated protein	267	333	209	584	302	0.692053	1	0.506967	0.337366	0.0425761	0.434781	0.684646	0.818711	1	1	0.551101	0.0425761
2132557	2132555	2132067		-	wcaB	b2058	putative acyl transferase	53	22	78	60	82	0.95122	1	0.733894	0.0428453	0.219855	0.842614	0.046909	0.552446	1	1	0.428097	0.0428453
4411979	4411979	4412377	4412386	+	yjfL	b4184	UPF0719 family inner membrane protein	52	29	69	43	64	1.07812	1	0.653684	0.282347	0.0429361	0.509211	0.635785	0.385804	1	1	0.648545	0.0429361
156201	156201	155461	155427	-	yadV	b0140	putative periplasmic pilin chaperone	28	21	48	28	42	1.14286	1	0.679936	0.347177	0.0429565	0.502177	0.81736	0.446443	1	1	0.488606	0.0429565
830805	830872	832236	832426	+	rhlE	b0797	ATP-dependent RNA helicase	56	96	68	57	48	1.41667	1	0.286848	0.304076	0.524326	0.47937	0.0429643	0.838685	1	1	0.134083	0.0429643
4351731	4351843	4352073	4352073	+	yjdI	b4126	putative 4Fe-4S mono-cluster protein	72	72	108	69	92	1.17391	1	0.528577	0.971053	0.0430018	0.501111	0.532258	0.515098	1	1	0.294124	0.0430018
4050778	4050765	4050133	4050013	-	yihA	b3865	cell division GTP-binding protein	73	126	65	81	64	1.01562	1	0.459801	0.141606	0.938396	0.494756	0.043031	0.818631	1	1	0.145186	0.043031
2278254	2278237	2277893	2275053	-	yejG	b2181	uncharacterized protein	109	275	125	207	140	0.892857	1	0.395776	0.0672275	0.417033	0.409059	0.0430677	0.619864	1	1	0.298964	0.0430677
1267317	1267320	1268129	1268129	+	ychA	b1214	transglutaminase-like TPR-repeat protein	95	142	71	108	72	0.986111	1	0.462965	0.0933521	0.467095	0.61923	0.0430677	0.586941	1	1	0.339474	0.0430677
281651	282278	283186	283200	+	yagE	b0268	2-keto-3-deoxy gluconate (KDG) aldolase; CP4-6 prophage	9	14	31	19	18	1.72222	0.455811	0.4102	0.348942	0.0430892	0.476682	0.539789	0.914628	1	1	0.47018	0.0430892
2454820	2452336	2451584		-	yfcS	b2336	putative periplasmic pilin chaperone	36	26	67	38	60	1.11667	1	0.364191	0.323008	0.0430892	0.470469	0.66232	0.36501	1	1	0.530352	0.0430892
3970133	3970133	3971263		+	wecB	b3786	UDP-N-acetyl glucosamine-2-epimerase	58	97	49	52	49	1	1	0.411083	0.10849	0.843718	0.458446	0.0433738	0.999321	1	1	0.0501928	0.0433738
	2231019	2231714	2231814	+	yohK	b2142	LrgB family inner membrane protein	21	19	53	31	33	1.60606	0.645563	0.764797	0.190925	0.0433783	0.499604	0.974455	0.831908	1	1	0.847786	0.0433783
4404684	4404687	4405985	4405985	+	purA	b4177	adenylosuccinate synthetase	407	442	129	336	160	0.80625	1	0.9347	0.0434097	0.162767	0.473385	0.354794	0.88719	1	1	0.701048	0.0434097
1102127	1102127	1101711	1101711	-	csgF	b1038	curli nucleation outer membrane protein	33	26	56	36	44	1.27273	1	0.503793	0.310836	0.0434546	0.500518	0.952284	0.61065	1	1	0.570279	0.0434546
3648378	3648528	3648881	3648923	+	arsR	b3501	arsenical resistance operon transcriptional repressor; autorepressor	44	29	54	35	44	1.22727	1	0.549968	0.412642	0.0434546	0.536408	0.87772	0.595827	1	1	0.413891	0.0434546
2025313			2025227	-	dsrA	b1954	-	12	22	55	56	50	1.1	1	0.845984	0.04356	0.482122	0.441987	0.152639	0.898258	1	1	0.191967	0.04356
687897	687747	686839	686791	-	gltI	b0655	glutamate, aspartate binding protein, periplasmic; part of GltJKLI ABC transporter	163	174	77	153	93	0.827957	1	0.79724	0.0436016	0.103029	0.989338	0.0955595	0.441025	1	1	0.495742	0.0436016
1119072	1119046	1118480	1118479	-	yceJ	b1057	putative cytochrome b561	29	27	64	38	55	1.16364	1	0.74242	0.347359	0.0436164	0.494797	0.81736	0.45086	1	1	0.490522	0.0436164
752223	752169	749722	749708	-	ybgQ	b0718	putative outer membrane protein	32	22	66	37	58	1.13793	1	0.0437096	0.175388	0.095481	0.301243	0.257638	0.39924	1	1	0.967985	0.0437096
2639283	2639283	2638663	2638653	-	yfgM	b2513	putative anti-RcsB factor	156	205	91	151	109	0.834862	1	0.704323	0.0438252	0.328252	0.768899	0.0658074	0.667883	1	1	0.327444	0.0438252
2882154	2882142	2881051	2881049	-	casC	b2758	CRISP RNA (crRNA) containing Cascade antiviral complex protein	33	29	60	34	42	1.42857	1	0.227314	0.636729	0.0438627	0.409059	0.632317	0.666296	1	1	0.425095	0.0438627
1653926	1653915	1652896	1649908	-	rspB	b1580	putative Zn-dependent NAD(P)-binding oxidoreductase	24	26	59	33	45	1.31111	1	0.332339	0.48623	0.0439432	0.991377	0.949536	0.572832	1	1	0.459496	0.0439432
4599464	4603477	4604202		+	yjjQ	b4365	putative transcriptional regulator	35	22	49	29	38	1.28947	1	0.923309	0.38713	0.0440249	0.558253	0.99362	0.568339	1	1	0.462978	0.0440249
4150328	4150265	4148532	4148528	-	eptC	b3955	LPS heptose I phosphoethanolamine transferase	78	87	47	43	46	1.02174	1	0.658565	0.147356	0.676415	0.950511	0.0846515	0.87279	1	1	0.0440775	0.0440775
4306597	4306597	4304612	4304612	-	yjcS	b4083	metallo-beta-lactamase superfamily protein	45	29	61	32	55	1.10909	1	0.255509	0.366045	0.0441141	0.421515	0.591221	0.257575	1	1	0.441224	0.0441141
361886	361860	361249	360320	-	lacA	b0342	thiogalactoside acetyltransferase	43	29	69	40	46	1.5	0.916613	0.537963	0.366483	0.0442903	0.612682	0.858081	0.741127	1	1	0.486579	0.0442903
3805152	3805116	3804181	3804138	-	waaS	b3629	lipopolysaccharide core biosynthesis protein	36	53	54	31	29	1.86207	0.428265	0.297552	0.486349	0.0444278	0.51643	0.0850505	0.940264	1	1	0.0545252	0.0444278
1070364	1070354	1069860	1069840	-	rutF	b1007	flavin:NADH reductase	20	14	45	29	33	1.36364	0.896749	0.468074	0.0448168	0.0444278	0.494644	0.413303	0.719254	1	1	0.726975	0.0444278
2358862	2358845	2358042	2357341	-	rhmA	b2245	2-keto-3-deoxy-L-rhamnonate aldolase	40	31	73	41	61	1.19672	1	0.230209	0.429173	0.0444278	0.372793	0.889567	0.487559	1	1	0.47292	0.0444278
2767483	2765776	2765513	2765327	-	yfjM	b2629	CP4-57 prophage; uncharacterized protein	41	44	81	53	70	1.15714	1	0.482845	0.470325	0.0444278	0.494392	0.939973	0.515098	1	1	0.406381	0.0444278
	577613	578110		+	rrrD	b0555	DLP12 prophage; putative lysozyme	50	59	95	55	80	1.1875	1	0.609083	0.963437	0.0444278	0.662121	0.560729	0.484572	1	1	0.33661	0.0444278
4473276	4473209	4472814	4472778	-	yjgH	b4248	UPF0131 family protein	49	40	86	51	76	1.13158	1	0.696546	0.277288	0.0444278	0.500697	0.875142	0.429979	1	1	0.450291	0.0444278
1360922	1360908	1359490	1359454	-	puuA	b1297	glutamate--putrescine ligase	57	85	51	49	43	1.18605	1	0.400002	0.20076	0.741626	0.662121	0.0444328	0.883376	1	1	0.107354	0.0444328
	1838747	1839400	1839466	+	ynjD	b1756	putative ABC superfamily transporter ATP-binding subunit	29	26	51	31	40	1.275	1	0.698707	0.537758	0.0446617	0.502177	0.804983	0.595827	1	1	0.421213	0.0446617
4287758	4287371	4285413	4285399	-	acs	b4069	acetyl-CoA synthetase	95	71	100	228	112	0.892857	1	0.448037	0.467929	0.309013	0.441987	0.470721	0.96646	1	1	0.0447164	0.0447164
3518486	3518486	3517398	3517398	-	aroB	b3389	3-dehydroquinate synthase	179	252	103	164	118	0.872881	1	0.803365	0.0448168	0.228583	0.557298	0.169219	0.657494	1	1	0.426511	0.0448168
3463908	3463922	3465085		+	gspL	b3333	general secretory pathway component, cryptic	41	30	61	34	55	1.10909	1	0.255584	0.609573	0.0449596	0.390522	0.95541	0.376681	1	1	0.42808	0.0449596
872802	872979	875327	875327	+	yliE	b0833	putative membrane-anchored cyclic-di-GMP phosphodiesterase	26	33	49	26	33	1.48485	0.938112	0.0898368	0.747258	0.0451787	0.390522	0.499488	0.713675	1	1	0.284085	0.0451787
1870239	1870385	1871860	1871958	+	yeaI	b1785	putative membrane-anchored diguanylate cyclase	34	27	65	35	48	1.35417	1	0.132068	0.354286	0.0451787	0.383163	0.936058	0.577743	1	1	0.491586	0.0451787
2473475	2473604	2473966	2473966	+	yfdP	b2359	CPS-53 (KpLE1) prophage; uncharacterized protein	31	18	50	32	39	1.28205	0.938112	0.50697	0.108835	0.0451956	0.499604	0.514607	0.656435	1	1	0.918681	0.0451956
	2844210	2843443		-	hycG	b2719	hydrogenase 3 and formate hydrogenase complex, HycG subunit	36	20	53	31	36	1.47222	0.940284	0.436775	0.270153	0.0452314	0.538456	0.964222	0.721451	1	1	0.675592	0.0452314
399371	399333	399025	396288	-	yaiY	b0379	DUF2755 family inner membrane protein	31	31	75	49	61	1.22951	1	0.457818	0.250247	0.0452314	0.479894	0.766682	0.574401	1	1	0.753997	0.0452314
1717256	1717222	1715948	1715948	-	tyrS	b1637	tyrosyl-tRNA synthetase	138	176	76	120	81	0.938272	1	0.977679	0.0452499	0.24496	0.754306	0.0850505	0.585499	1	1	0.406642	0.0452499
3434214	3434214	3435161	3435161	+	fmt	b3288	10-formyltetrahydrofolate:L-methionyl-tRNA(fMet) N-formyltransferase	97	175	78	138	97	0.804124	1	0.434905	0.0453641	0.184376	0.458156	0.14656	0.641865	1	1	0.40935	0.0453641
777720	777740	779032	779066	+	tolB	b0740	periplasmic protein	232	270	100	209	136	0.735294	1	0.432309	0.0455937	0.146191	0.674735	0.468506	0.798739	1	1	0.941534	0.0455937
1834794	1834808	1835515		+	ydjZ	b1752	TVP38/TMEM64 family inner membrane protein	44	26	75	43	61	1.22951	1	0.272742	0.246877	0.0457596	0.394993	0.675649	0.524279	1	1	0.722336	0.0457596
4065771	4065766	4064363	4064296	-	yihO	b3876	putative transporter	43	27	54	30	43	1.25581	1	0.281072	0.618064	0.0458337	0.417677	0.883767	0.524757	1	1	0.425682	0.0458337
	1694263	1692890	1692852	-	uidB	b1616	glucuronide transporter	38	26	73	39	70	1.04286	1	0.112074	0.234492	0.0459456	0.205807	0.316449	0.205656	1	1	0.688911	0.0459456
676711	676711	677418		+	ybeR	b0645	uncharacterized protein	24	23	50	30	40	1.25	1	0.73336	0.410751	0.0459456	0.498601	0.980561	0.541638	1	1	0.45819	0.0459456
549617	549627	550442		+	ylbF	b0520	putative anaerobic allantoin catabolic oxamate carbamoyltransferase; DUF2877 family protein	112	33	131	102	123	1.06504	1	0.300539	0.0459517	0.422764	0.441987	0.0752884	0.739236	1	1	0.314975	0.0459517
3507710	3507701	3507348	3507337	-	yhfU	b3378	DUF2620 family protein	32	22	47	31	32	1.46875	0.661969	0.516796	0.292989	0.0461902	0.533422	0.87882	0.820792	1	1	0.641509	0.0461902
4304109	4304109	4303078		-	mdtN	b4082	membrane fusion protein of efflux pump	56	28	63	36	56	1.125	1	0.324685	0.495602	0.0462616	0.424898	0.85381	0.395984	1	1	0.459129	0.0462616
4518243	4518235	4517714		-	fecI	b4293	RNA polymerase, sigma 19 factor	64	133	108	166	148	0.72973	1	0.259007	0.358974	0.451773	0.0463263	0.584179	0.893843	1	1	0.735556	0.0463263
	3462344	3462931		+	gspJ	b3331	putative general secretory pathway component, cryptic	47	38	71	41	71	1	1	0.428739	0.760638	0.0463594	0.473385	0.977788	0.234276	1	1	0.404525	0.0463594
463787	463937	464308	464355	+	ybaV	b0442	putative competence-suppressing periplasmic helix-hairpin-helix DNA-binding protein	32	26	48	31	44	1.09091	1	0.514517	0.382522	0.0463594	0.498601	0.937569	0.464343	1	1	0.433089	0.0463594
4326778	4326734	4326399	4326293	-	yjdM	b4108	zinc-ribbon family protein	61	64	59	48	35	1.68571	0.412253	0.602524	0.517696	0.174978	0.510402	0.0465093	0.776407	1	1	0.147963	0.0465093
	4315538	4315104	4315104	-	phnO	b4093	aminoalkylphosphonate N-acetyltransferase	15	26	45	29	24	1.875	0.274757	0.437027	0.532145	0.0466747	0.494862	0.358606	0.925987	1	1	0.374812	0.0466747
251954	252005	252298	252300	+	yafN	b0232	antitoxin of the YafO-YafN toxin-antitoxin system	37	39	61	40	43	1.4186	0.702141	0.50208	0.659867	0.0466747	0.500963	0.434514	0.798368	1	1	0.329308	0.0466747
	2871780	2871301		-	ispF	b2746	2C-methyl-D-erythritol 2,4-cyclodiphosphate synthase	51	75	44	44	39	1.12821	1	0.572835	0.302483	0.461533	0.943594	0.0468126	0.970073	1	1	0.0501928	0.0468126
	573084	573374		+	ybcO	b0549	DLP12 prophage; uncharacterized protein	61	40	90	58	90	1	1	0.531735	0.305617	0.0468882	0.500554	0.598162	0.294169	1	1	0.603119	0.0468882
	2444751	2444203	2444170	-	epmC	b2326	Elongation Factor P Lys34 hydroxylase	64	128	76	76	66	1.15152	1	0.387333	0.228387	0.631209	0.443227	0.046909	0.945571	1	1	0.0636659	0.046909
4163273	4163270	4162170	4161098	-	trmA	b3965	tRNA m(5)U54 methyltransferase, SAM-dependent; tmRNA m(5)U341 methyltransferase	62	95	49	58	49	1	1	0.43617	0.114672	0.939299	0.491981	0.046909	0.844535	1	1	0.128132	0.046909
3814480	3814494	3815090	3815311	+	slmA	b3641	nucleoid occlusion factor, anti-FtsZ division inhibitor	102	111	68	67	57	1.19298	1	0.492575	0.254002	0.611267	0.896743	0.0470504	0.910447	1	1	0.0775046	0.0470504
1222641	1222634	1222305	1222250	-	ymgD	b1171	uncharacterized protein	41	31	78	50	55	1.41818	0.829879	0.488212	0.232585	0.0470764	0.499604	0.926589	0.767425	1	1	0.792794	0.0470764
	996944	995985		-	ssuA	b0936	aliphatic sulfonate binding protein, SsuABC ABC transporter	40	25	70	40	59	1.18644	1	0.230436	0.276782	0.047345	0.390522	0.661023	0.483646	1	1	0.670201	0.047345
4062146	4062247	4063512	4064235	+	yihN	b3874	MFS transporter family protein	44	31	58	33	50	1.16	1	0.268697	0.715816	0.0474749	0.404036	0.907896	0.446389	1	1	0.407343	0.0474749
3063983	3063993	3064778	3064778	+	scpB	b2919	methylmalonyl-CoA decarboxylase, biotin-independent	43	31	70	40	63	1.11111	1	0.268683	0.488089	0.0476092	0.381625	0.843874	0.389986	1	1	0.461067	0.0476092
1181782	1181725	1181264		-	ymfA	b1122	DUF3592 family inner membrane protein	40	29	74	45	62	1.19355	1	0.710323	0.265098	0.047844	0.500554	0.711374	0.517028	1	1	0.707413	0.047844
766063	765875	765153	765024	-	mngR	b0730	Transcriptional repressor for the mannosyl-D-glycerate catabolic operon	20	27	46	28	36	1.27778	1	0.753613	0.908268	0.047844	0.496948	0.547735	0.586941	1	1	0.366842	0.047844
485671	485619	484426	484404	-	acrA	b0463	multidrug efflux system	91	130	60	87	64	0.9375	1	0.50697	0.0590425	0.490762	0.657475	0.0479883	0.696392	1	1	0.271539	0.0479883
1995812	1995818	1996042	1996385	+	yecF	b1915	DUF2594 family protein	35	47	54	37	38	1.42105	0.773378	0.510618	0.755944	0.0481658	0.502971	0.295482	0.7894	1	1	0.141527	0.0481658
532231	532221	531295	531227	-	allS	b0504	allD operon transcriptional activator	40	23	66	38	47	1.40426	1	0.255509	0.255839	0.0481992	0.419333	0.857705	0.664893	1	1	0.716224	0.0481992
2548102	2548102	2549406	2552157	+	yfeW	b2430	penicillin binding protein PBP4B; weak DD-carboxypeptidase activity	25	20	50	28	35	1.42857	1	0.192196	0.383424	0.0482027	0.390522	0.969983	0.662725	1	1	0.504428	0.0482027
2539716	2539583	2538672	2538415	-	cysM	b2421	cysteine synthase B (O-acetylserine sulfhydrolase B)	119	201	101	97	99	1.0202	1	0.399149	0.114018	0.787573	0.477412	0.0736561	0.918255	1	1	0.0483882	0.0483882
1734396	1734435	1735250	1735294	+	mepH	b1655	murein DD-endopeptidase, space-maker hydrolase	39	36	72	41	43	1.67442	0.6997	0.233626	0.696635	0.0484581	0.432926	0.512416	0.831908	1	1	0.420116	0.0484581
1770478	1770615	1770971	1771057	+	ydiL	b1689	putative HTH domain DNA-binding protein	24	24	58	38	41	1.41463	0.740789	0.459514	0.226297	0.0484647	0.48954	0.941909	0.798498	1	1	0.834298	0.0484647
961969	961995	963668	963668	+	rpsA	b0911	30S ribosomal subunit protein S1	1831	2850	363	1060	614	0.591205	1	0.858399	0.0485973	0.806314	0.465415	0.547088	0.831908	1	1	0.76415	0.0485973
2268848	2268854	2269567	2269592	+	lpxT	b2174	lipid A 1-diphosphate synthase; undecaprenyl pyrophosphate:lipid A 1-phosphate phosphotransferase	57	88	76	51	69	1.10145	1	0.326249	0.3959	0.132635	0.416201	0.300486	0.552446	1	1	0.0492404	0.0492404
1696071	1696071	1694260		-	uidA	b1617	beta-D-glucuronidase	37	34	72	43	68	1.05882	1	0.049241	0.307649	0.10773	0.0865363	0.414065	0.402431	1	1	0.68987	0.049241
	1640057	1639524	1639524	-	rrrQ	b1554	Qin prophage; putative lysozyme	39	34	58	36	59	0.983051	1	0.659674	0.821976	0.0494439	0.502971	0.931275	0.272011	1	1	0.374519	0.0494439
1582524	1582524	1580842	1580791	-	ydeN	b1498	putative Ser-type periplasmic non-aryl sulfatase	32	35	68	43	54	1.25926	1	0.0494795	0.514911	0.16172	0.279745	0.977788	0.710544	1	1	0.565656	0.0494795
1063882	1064036	1065292	1065322	+	yccE	b1001	uncharacterized protein	25	23	54	31	29	1.86207	0.412253	0.166615	0.453743	0.0494798	0.431548	0.533805	0.969014	1	1	0.472091	0.0494798
3875172	3875160	3874471		-	dgoR	b4479	putative DNA-binding transcriptional regulator	31	26	45	28	34	1.32353	1	0.655752	0.747296	0.0494798	0.516155	0.542727	0.66161	1	1	0.388893	0.0494798
3284685	3284685	3285488		+	agaC	b3139	N-acetylgalactosamine-specific enzyme IIC component of PTS	31	23	43	26	37	1.16216	1	0.879676	0.691333	0.0494798	0.556344	0.854565	0.478354	1	1	0.406642	0.0494798
	2445560	2444751		-	yfcA	b2327	UPF0721 family inner membrane protein	54	110	65	64	57	1.14035	1	0.353738	0.205491	0.70201	0.443227	0.0495527	0.932546	1	1	0.0816112	0.0495527
472596	472598	472936	472965	+	glnK	b0450	nitrogen assimilation regulatory protein for GlnL, GlnE, and AmtB	50	32	81	52	74	1.09459	1	0.517005	0.237911	0.0498575	0.500433	0.545088	0.441025	1	1	0.786161	0.0498575
1515578	1515578	1517002	1517199	+	patD	b1444	gamma-aminobutyraldehyde dehydrogenase	47	39	89	88	91	0.978022	1	0.0655856	0.298871	0.840481	0.0500903	0.303365	0.853709	1	1	0.433533	0.0500903
311336	311336	310746	310746	-	ecpR	b0294	putative transcriptional regulator for the ecp operon	47	28	61	37	43	1.4186	0.982293	0.536913	0.430777	0.0501151	0.815423	0.838146	0.710545	1	1	0.458818	0.0501151
605886	605886	605518	605428	-	ybdF	b0579	DUF419 family protein	35	34	64	42	57	1.12281	1	0.490745	0.483237	0.050159	0.496448	0.982629	0.484572	1	1	0.414494	0.050159
3039842	3039855	3040376	3040387	+	fldB	b2895	flavodoxin 2	83	137	73	78	73	1	1	0.475436	0.174982	0.738314	0.498601	0.0607951	0.974487	1	1	0.0503101	0.0503101
3284170	3284170	3284646	3284669	+	agaB	b3138	N-acetylgalactosamine-specific enzyme IIB component of PTS	34	26	49	32	43	1.13953	1	0.531288	0.463813	0.0503114	0.501111	0.956602	0.52554	1	1	0.42292	0.0503114
4362626			4362551	-	pheU	b4134	Phe tRNA	129	93	117	80	96	1.21875	1	0.584277	0.818244	0.0503114	0.792184	0.482855	0.616874	1	1	0.200002	0.0503114
651954	651856	650798	650784	-	citC	b0618	[citrate [pro-3S]-lyase] ligase	48	27	75	42	66	1.13636	1	0.226831	0.26753	0.0503803	0.384834	0.542688	0.415196	1	1	0.677631	0.0503803
1250976	1251066	1252985	1253234	+	dhaR	b1201	dhaKLM operon transcription activator	36	35	70	44	68	1.02941	1	0.0505195	0.322376	0.130504	0.0776761	0.386794	0.406045	1	1	0.722354	0.0505195
4053757	4053757	4053647	4051928	-	yshB	b4686	uncharacterized protein	145	149	77	121	78	0.987179	1	0.656578	0.269065	0.963758	0.590836	0.0511442	0.689619	1	1	0.186933	0.0511442
	2963156	2962749		-	ygdB	b2824	DUF2509 family protein	35	35	71	44	45	1.57778	0.649438	0.484776	0.464456	0.0511727	0.500697	0.534641	0.836638	1	1	0.430527	0.0511727
1640710	1640585	1640370	1640370	-	essQ	b1556	Qin prophage; putative S lysis protein	31	30	49	33	35	1.4	0.809118	0.507773	0.423932	0.0511727	0.502177	0.681954	0.776407	1	1	0.406244	0.0511727
708256	708334	709740	709740	+	chiP	b0681	chitoporin, uptake of chitosugars	36	26	68	37	57	1.19298	1	0.133066	0.298958	0.0511727	0.345132	0.674939	0.46764	1	1	0.577137	0.0511727
4044199	4044199	4045629	4045839	+	yihF	b3861	DUF945 family protein	34	27	55	31	44	1.25	1	0.224112	0.573194	0.0511727	0.390522	0.9295	0.527532	1	1	0.434969	0.0511727
3563531	3575071	3575664	3575709	+	yhgN	b3434	UPF0056 family inner membrane protein	61	46	63	38	51	1.23529	1	0.43932	0.617402	0.0511727	0.513239	0.495572	0.552446	1	1	0.260968	0.0511727
3151984	3151984	3151250	3151244	-	exbB	b3006	membrane spanning protein in TonB-ExbB-ExbD complex	229	455	173	353	265	0.65283	1	0.514021	0.0512477	0.151502	0.427813	0.977788	0.822826	1	1	0.996332	0.0512477
	1673149	1672820	1672581	-	mdtI	b1599	multidrug efflux system transporter	40	31	69	45	64	1.07812	1	0.501563	0.303849	0.0513621	0.497588	0.714916	0.438878	1	1	0.647774	0.0513621
43174	43188	44129	44169	+	fixB	b0042	putative electron transfer flavoprotein, NAD/FAD-binding domain and ETFP adenine nucleotide-binding domain-like protein	27	16	52	30	42	1.2381	1	0.404874	0.130086	0.0513975	0.938181	0.434308	0.527532	1	1	0.999373	0.0513975
	3398875	3398387	3398387	-	mreD	b3249	cell wall structural complex MreBCD transmembrane component MreD	72	142	77	82	86	0.895349	1	0.432537	0.190925	0.700892	0.416201	0.130434	0.831908	1	1	0.0514562	0.0514562
3941339	3941327	3940635	3940635	-	yieP	b3755	putative transcriptional regulator	58	71	45	41	44	1.02273	1	0.519011	0.302483	0.416463	0.717086	0.145013	0.828895	1	1	0.0514562	0.0514562
4539515	4539501	4538785	4538766	-	nanC	b4311	N-acetylnuraminic acid outer membrane channel protein	49	37	72	42	50	1.44	1	0.303137	0.693925	0.0517265	0.443227	0.561921	0.717642	1	1	0.423254	0.0517265
577392	577398	577613		+	essD	b0554	DLP12 prophage; putative phage lysis protein	34	40	57	39	56	1.01786	1	0.501325	0.680451	0.0523542	0.490958	0.818219	0.429979	1	1	0.286319	0.0523542
208609	208621	209580	209606	+	accA	b0185	acetyl-CoA carboxylase, carboxytransferase, alpha subunit	190	215	95	163	123	0.772358	1	0.788718	0.0524422	0.179878	0.544241	0.262399	0.745679	1	1	0.43589	0.0524422
	2882637	2882155	2882155	-	casB	b2759	CRISP RNA (crRNA) containing Cascade antiviral complex protein	45	31	65	40	48	1.35417	1	0.652803	0.254128	0.0524619	0.517682	0.885333	0.667883	1	1	0.457987	0.0524619
2010490	2010600	2011079	2011152	+	yedL	b1932	putative acyl transferase	44	23	81	61	79	1.02532	1	0.683799	0.0526597	0.211583	0.500697	0.10384	0.625459	1	1	0.45854	0.0526597
2933691	2933688	2933041	2933014	-	fucA	b2800	L-fuculose-1-phosphate aldolase	42	25	64	38	49	1.30612	1	0.441143	0.286243	0.0529443	0.518973	0.864537	0.621201	1	1	0.670201	0.0529443
	1182829	1181783	1181783	-	potD	b1123	polyamine transporter subunit	173	149	86	121	74	1.16216	1	0.769065	0.187875	0.480855	0.481472	0.053073	0.465971	1	1	0.420116	0.053073
1069839	1069839	1068511	1068009	-	rutG	b1006	pyrimidine permease	85	30	114	86	100	1.14	1	0.246424	0.053117	0.258712	0.410826	0.118603	0.746867	1	1	0.28863	0.053117
426137	426137	427264	427264	+	tgt	b0406	tRNA-guanine transglycosylase	113	158	82	82	76	1.07895	1	0.471382	0.129551	0.876638	0.671033	0.0531546	0.946876	1	1	0.0921581	0.0531546
229167	229167	229970	230111	+	dkgB	b0207	2,5-diketo-D-gluconate reductase B	28	33	63	37	44	1.43182	1	0.989153	0.725575	0.0531907	0.504157	0.554704	0.71805	1	1	0.418083	0.0531907
1737563	1737545	1737456	1737396	-	ynhF	b4602	stress response membrane	36	65	64	46	51	1.2549	1	0.503157	0.665782	0.0611853	0.501111	0.295482	0.628568	1	1	0.0534564	0.0534564
2788934	2788985	2789962	2789978	+	csiD	b2659	carbon starvation protein	21	25	65	103	54	1.2037	1	0.55659	0.328375	0.372626	0.75267	0.75372	0.26501	1	1	0.0534564	0.0534564
801887	801887	803320	803391	+	ybhI	b0770	putative transporter	37	33	75	49	80	0.9375	1	0.0758066	0.367967	0.194325	0.0535044	0.305717	0.344053	1	1	0.795599	0.0535044
1193778	1193773	1192667	1192667	-	mnmA	b1133	tRNA(Gln,Lys,Glu) U34 2-thiouridylase, first step in mnm(5)-s(2)U34-tRNA synthesis	126	222	95	125	101	0.940594	1	0.472856	0.0536126	0.583069	0.490958	0.105907	0.828895	1	1	0.260968	0.0536126
66834	66550	65855	65781	-	araD	b0061	L-ribulose-5-phosphate 4-epimerase	19	17	50	30	43	1.16279	1	0.462681	0.157438	0.0536604	0.479224	0.456636	0.515098	1	1	0.965892	0.0536604
1040433	1040445	1040537	1040537	+	cbdX	b4592	putative cytochrome bd-II oxidase subunit	42	29	77	55	75	1.02667	1	0.709581	0.109766	0.0536604	0.499604	0.23854	0.436834	1	1	0.844417	0.0536604
4484439	4484280	4483837		-	holC	b4259	DNA polymerase III, chi subunit	118	139	67	100	72	0.930556	1	0.570024	0.151349	0.786803	0.990722	0.0537258	0.762431	1	1	0.197132	0.0537258
	4615543	4614680	4611015	-	yjjW	b4379	putative pyruvate formate lyase activating enzyme	32	23	54	32	44	1.22727	1	0.381556	0.413825	0.0539069	0.496801	0.936058	0.542784	1	1	0.488606	0.0539069
1369688	1369689	1370003	1370003	+	pspE	b1308	thiosulfate:cyanide sulfurtransferase (rhodanese)	44	61	57	67	33	1.72727	0.392438	0.535748	0.530223	0.694508	0.831669	0.0539118	0.234276	1	1	0.404525	0.0539118
4422837	4422846	4423700		+	ulaE	b4197	L-xylulose 5-phosphate 3-epimerase	43	37	69	40	53	1.30189	1	0.268913	0.764016	0.054084	0.411571	0.652416	0.601242	1	1	0.411637	0.054084
3421316	3421325	3422428	3422435	+	yhdY	b3270	putative amino-acid transporter subunit	39	21	59	34	56	1.05357	1	0.272714	0.276451	0.054084	0.390522	0.472678	0.303333	1	1	0.697953	0.054084
51606	51606	51229	51229	-	apaG	b0050	protein associated with Co2+ and Mg2+ efflux	101	164	86	125	86	1	1	0.501325	0.190925	0.787279	0.517682	0.0541685	0.688049	1	1	0.243127	0.0541685
3897440	3897506	3897973	3898021	+	cbrB	b3716	PRK09823 family inner membrane protein, creBC regulon	63	50	80	49	72	1.11111	1	0.43617	0.991444	0.0542193	0.475323	0.623304	0.45086	1	1	0.355236	0.0542193
1099617	1099640	1100194	1100194	+	ycdY	b1035	redox enzyme maturation protein (REMP) chaperone for YcdX	97	126	64	84	66	0.969697	1	0.514367	0.155518	0.924777	0.797096	0.0543546	0.826824	1	1	0.154727	0.0543546
	647509	646631	646581	-	citG	b0613	2-(5''-triphosphoribosyl)-3'-dephosphocoenzyme-A synthase	34	22	54	32	48	1.125	1	0.325083	0.343331	0.0544528	0.41711	0.735664	0.450369	1	1	0.546125	0.0544528
4080175	4073571	4072675	4072654	-	yihU	b3882	gamma-hydroxybutyrate dehydrogenase, NADH-dependent	41	28	49	29	40	1.225	1	0.383573	0.895866	0.0546469	0.461182	0.598162	0.537872	1	1	0.388893	0.0546469
1677950	1677903	1676371	1676371	-	pntA	b1603	pyridine nucleotide transhydrogenase, alpha subunit	447	364	109	222	161	0.677019	1	0.317288	0.0546617	0.301051	0.474298	0.947371	0.826824	1	1	0.951446	0.0546617
4042063	4042069	4042338	4042414	+	yihD	b3858	DUF1040 protein YihD	62	76	49	59	43	1.13953	1	0.61331	0.365305	0.643348	0.938405	0.054864	0.776407	1	1	0.163459	0.054864
	2566884	2565481	2562269	-	eutA	b2451	reactivating factor for ethanolamine ammonia lyase	39	14	55	38	42	1.30952	1	0.250893	0.0548881	0.222614	0.410692	0.315623	0.831902	1	1	0.486349	0.0548881
2792722	2792735	2794015	2794015	+	gabT	b2662	4-aminobutyrate aminotransferase, PLP-dependent	29	26	62	104	57	1.08772	1	0.142134	0.429445	0.228214	0.233923	0.711431	0.288353	1	1	0.0553197	0.0553197
2142962	2142948	2142307	2142266	-	udk	b2066	uridine/cytidine kinase	73	76	50	53	40	1.25	1	0.530801	0.318205	0.661195	0.716273	0.0554662	0.803322	1	1	0.160973	0.0554662
3561848	3561823	3561497	3561497	-	glpE	b3425	thiosulfate:cyanide sulfurtransferase (rhodanese)	78	144	80	104	75	1.06667	1	0.571662	0.256515	0.949755	0.569073	0.0554662	0.776407	1	1	0.183884	0.0554662
2412636	2412594	2412100	2412100	-	yfbU	b2294	UPF0304 family protein	111	117	62	78	61	1.01639	1	0.582624	0.208457	0.928459	0.82856	0.0554662	0.831908	1	1	0.130631	0.0554662
970672	970673	970855		+	ycaR	b0917	peroxide and acid resistance protein, UPF0434 family	80	111	58	79	62	0.935484	1	0.620634	0.270746	0.81332	0.842614	0.0554662	0.842166	1	1	0.102272	0.0554662
2298259	2298259	2297657	2297657	-	napC	b2202	quinol dehydrogenase, electron source for NapAB	24	20	36	24	25	1.44	0.708628	0.518555	0.535191	0.0554998	0.517682	0.499898	0.828895	1	1	0.400387	0.0554998
1634412			1634533	+	-	predicted RNA	antisense: tfaQ	50	134	219	143	124	1.76613	0.361826	0.383259	0.781692	0.0556279	0.462083	0.357875	0.962056	1	1	0.367105	0.0556279
2663328	2663323	2662583	2662320	-	trmJ	b2532	tRNA mC32,mU32 2'-O-methyltransferase, SAM-dependent	120	165	80	137	87	0.91954	1	0.506428	0.0777821	0.275063	0.755692	0.0560745	0.517028	1	1	0.419218	0.0560745
774751	774752	775156		+	ybgC	b0736	acyl-CoA thioester hydrolase	88	137	67	98	72	0.930556	1	0.539135	0.171491	0.855651	0.540331	0.0560875	0.783119	1	1	0.176843	0.0560875
1567269	1567140	1565758	1565734	-	dosC	b1490	diguanylate cyclase, cold- and stationary phase-induced oxygen-dependent biofilm regulator	40	48	83	73	75	1.10667	1	0.056338	0.597237	0.674432	0.166549	0.843874	0.897614	1	1	0.955513	0.056338
2423647	2423539	2422649	2422649	-	yfcI	b2305	transposase_31 family protein	18	31	48	29	33	1.45455	0.938112	0.757803	0.900286	0.0564836	0.497939	0.47086	0.773157	1	1	0.339474	0.0564836
	2109584	2108337	2108337	-	wzxB	b2037	putative polisoprenol-linked O-antigen transporter	42	62	53	46	33	1.60606	0.797872	0.300539	0.375102	0.527462	0.554011	0.0569505	0.720937	1	1	0.238866	0.0569505
1923706	1923706	1923365	1923338	-	yebY	b1839	DUF2511 family protein	104	145	91	86	81	1.12346	1	0.500348	0.296186	0.458406	0.640755	0.0878497	0.938842	1	1	0.0569669	0.0569669
983065	983075	983623	983644	+	ycbK	b0926	M15A protease-related family periplasmic protein	171	272	178	394	252	0.706349	1	0.335601	0.262453	0.0570874	0.390522	0.787295	0.56683	1	1	0.458155	0.0570874
3618583	3618588	3618989	3619035	+	nikR	b3481	transcriptional repressor, Ni-binding	30	37	51	34	30	1.7	0.392438	0.500865	0.862376	0.0570955	0.435127	0.259775	0.979283	1	1	0.258565	0.0570955
2385104	2385860	2386831	2386929	+	yfbL	b2271	putative peptidase	39	32	76	44	69	1.10145	1	0.187284	0.437436	0.0570955	0.330771	0.764118	0.41381	1	1	0.488606	0.0570955
4563603	4563603	4562743	4562676	-	yjiK	b4333	SdiA-regulated family putative membrane-anchored protein; putative phytase-like esterase	37	37	60	35	39	1.53846	0.874395	0.284892	0.964903	0.0571327	0.441987	0.463282	0.795328	1	1	0.35287	0.0571327
911049	911049	909331	909325	-	poxB	b0871	pyruvate dehydrogenase (pyruvate oxidase), thiamine triphosphate-binding, FAD-binding	52	44	81	148	96	0.84375	1	0.195999	0.344249	0.258288	0.288967	0.302981	0.681901	1	1	0.0574883	0.0574883
	4161771	4162130	4162193	+	yijD	b3964	DUF1422 family inner membrane protein	136	188	80	165	100	0.8	1	0.570397	0.0783645	0.246854	0.712893	0.057521	0.517028	1	1	0.35287	0.057521
1074022	1074242	1074880	1075572	+	rutR	b1013	rut operon transcriptional repressor for	34	26	59	36	34	1.73529	0.52611	0.669514	0.389156	0.0575688	0.524341	0.550853	0.934296	1	1	0.495881	0.0575688
1780382	1780401	1781339	1781394	+	ydiR	b1698	putative electron transfer flavoprotein, FAD-binding subunit	34	27	69	40	67	1.02985	1	0.187284	0.361423	0.0578117	0.205807	0.585697	0.31272	1	1	0.544545	0.0578117
1343356	1343328	1343110	1341746	-	osmB	b1283	lipoprotein	28	37	67	136	66	1.01515	1	0.462509	0.365208	0.422751	0.46851	0.864292	0.158673	1	1	0.0578809	0.0578809
694976	694955	693531	693416	-	miaB	b0661	tRNA-i(6)A37 methylthiotransferase	86	108	55	65	54	1.01852	1	0.525062	0.115169	0.885082	0.835092	0.0580314	0.831908	1	1	0.175328	0.0580314
875328	875335	876663	878239	+	yliF	b0834	putative membrane-anchored diguanylate cyclase	32	35	58	33	39	1.48718	0.946927	0.20283	0.891481	0.0581556	0.413047	0.490482	0.770585	1	1	0.371305	0.0581556
3724397	3724397	3722328	3722320	-	glyS	b3559	glycine tRNA synthetase, beta subunit	177	233	74	132	83	0.891566	1	0.755909	0.0585657	0.337763	0.480061	0.200046	0.691482	1	1	0.636882	0.0585657
	552594	551527	551321	-	purK	b0522	N5-carboxyaminoimidazole ribonucleotide synthase	144	226	98	133	102	0.960784	1	0.512914	0.0587913	0.511154	0.500697	0.0932374	0.776407	1	1	0.302687	0.0587913
4070401	4070401	4069475	4069398	-	yihR	b3879	mutarotase superfamily protein, YihR family	35	20	51	30	44	1.15909	1	0.320291	0.360807	0.0591449	0.402612	0.777704	0.483646	1	1	0.533739	0.0591449
1433697	1433674	1433084	1432707	-	pinR	b1374	Rac prophage; putative site-specific recombinase	38	42	89	53	54	1.64815	0.708628	0.820652	0.567264	0.0591656	0.510402	0.542727	0.843017	1	1	0.448382	0.0591656
1045841	1045803	1044664		-	gfcE	b0983	putative O-antigen capsule outer membrane auxillary protein export channel	27	21	56	33	59	0.949153	1	0.195999	0.307649	0.0591656	0.151821	0.391182	0.174899	1	1	0.653306	0.0591656
454437	454472	454789	454828	+	bolA	b0435	stationary-phase morphogene, transcriptional repressor for mreB; also regulator for dacA, dacC, and ampC	109	115	132	312	189	0.698413	1	0.381556	0.535291	0.0591656	0.311568	0.910674	0.46764	1	1	0.394565	0.0591656
	653862	654542	655048	+	citB	b0620	response regulator in two-component regulatory system with CitA	29	33	52	32	51	1.01961	1	0.689679	0.972845	0.0591656	0.500554	0.749343	0.355117	1	1	0.353651	0.0591656
3650225	3650237	3650662	3650715	+	arsC	b3503	arsenate reductase	59	42	77	48	64	1.20312	1	0.67149	0.661369	0.0591737	0.548298	0.790242	0.552446	1	1	0.413891	0.0591737
618156	618254	619387	622299	+	fepE	b0587	regulator of length of O-antigen component of lipopolysaccharide chains	22	22	52	30	35	1.48571	0.946927	0.331665	0.416227	0.0593942	0.87027	0.764882	0.776407	1	1	0.47523	0.0593942
649581	649571	648039	648036	-	citF	b0615	citrate lyase, citrate-ACP transferase (alpha) subunit	32	22	58	32	51	1.13725	1	0.175679	0.302483	0.0598672	0.34828	0.585697	0.425857	1	1	0.617623	0.0598672
1880759	1880759	1880121	1880121	-	leuE	b1798	leucine efflux protein	45	29	82	49	66	1.24242	1	0.307387	0.252004	0.0598672	0.443227	0.692246	0.565665	1	1	0.76356	0.0598672
2150985	2150985	2149039	2148986	-	yegI	b2070	protein kinase-related putative non-specific DNA-binding protein	30	21	60	35	43	1.39535	1	0.059882	0.200324	0.0964751	0.357926	0.708174	0.737828	1	1	0.933936	0.059882
3287426	3287426	3288010	3288010	+	yraH	b3142	putative fimbrial-like adhesin protein	42	33	58	36	51	1.13725	1	0.323828	0.523971	0.0598883	0.543734	0.729049	0.515098	1	1	0.400387	0.0598883
2796800	2797211	2797510	2797519	+	ygaV	b2667	tributyltin-inducible repressor of ygaVP	25	21	33	23	25	1.32	0.938112	0.530552	0.429445	0.060293	0.504631	0.77421	0.725498	1	1	0.419286	0.060293
4143610	4143624	4143944	4143993	+	frwB	b3950	putative enzyme IIB component of PTS	69	28	68	46	49	1.38776	0.82418	0.610478	0.236776	0.0607077	0.916952	0.925157	0.79476	1	1	0.851848	0.0607077
	4399252	4400202	4400202	+	miaA	b4171	delta(2)-isopentenylpyrophosphate tRNA-adenosine transferase	187	204	105	231	137	0.766423	1	0.920321	0.13297	0.0607881	0.510404	0.389496	0.515098	1	1	0.872725	0.0607881
	4602097	4601624	4601560	-	yjjB	b4363	DUF3815 family inner membrane protein	50	32	78	48	60	1.3	1	0.657817	0.298259	0.060833	0.526916	0.881064	0.63778	1	1	0.675737	0.060833
1627517	1627517	1628263	1628263	+	ydfG	b1539	NADP-dependent 3-hydroxy acid dehydrogenase; malonic semialdehyde reductase	145	150	77	141	80	0.9625	1	0.886444	0.107286	0.199963	0.818021	0.0608988	0.378941	1	1	0.575625	0.0608988
1633503	1633622	1634212	1634220	+	pinQ	b1545	Qin prophage; putative site-specific recombinase	39	46	95	56	59	1.61017	0.773378	0.483512	0.59542	0.0611853	0.512293	0.545088	0.831908	1	1	0.447032	0.0611853
4139708	4139708	4139046	4139046	-	fsaB	b3946	fructose-6-phosphate aldolase 2	43	21	56	34	39	1.4359	0.946927	0.449826	0.267058	0.0611853	0.662883	0.949555	0.77012	1	1	0.745098	0.0611853
2188429	2188414	2187380	2187220	-	yehA	b2108	putative fimbrial-like adhesin protein	28	32	55	33	48	1.14583	1	0.268141	0.922955	0.0611853	0.401256	0.711825	0.491237	1	1	0.385469	0.0611853
2660316	2660289	2659903	2659903	-	iscU	b2529	iron-sulfur cluster assembly scaffold protein	289	342	159	342	203	0.783251	1	0.817677	0.0612431	0.0687336	0.642819	0.142746	0.424209	1	1	0.742851	0.0612431
3790095	3790081	3789047	3785016	-	waaH	b3615	LPS(HepIII)-glucuronic acid glycosyltransferase	52	35	76	43	52	1.46154	0.999513	0.243503	0.527164	0.0613901	0.435127	0.730343	0.751293	1	1	0.45907	0.0613901
	2180095	2181099		+	yegU	b2099	ADP-ribosylglycohydrolase family protein	28	25	50	30	47	1.06383	1	0.325334	0.638585	0.0616554	0.424883	0.947371	0.39177	1	1	0.437352	0.0616554
1562481	1562481	1560931	1560930	-	ddpA	b1487	D-ala-D-a la transporter subunit	36	37	73	50	64	1.14062	1	0.0617554	0.496994	0.248749	0.205807	0.799109	0.679751	1	1	0.740933	0.0617554
2640575	2640575	2639301	2639284	-	hisS	b2514	histidyl tRNA synthetase	180	271	103	176	132	0.780303	1	0.66338	0.0618816	0.248268	0.859765	0.396933	0.725498	1	1	0.514352	0.0618816
1987770	1987758	1987507	1987498	-	yecJ	b4537	uncharacterized protein	69	94	73	62	63	1.15873	1	0.576681	0.45706	0.184057	0.620661	0.160502	0.831908	1	1	0.0620711	0.0620711
3751933	3751868	3751128	3744107	-	yiaT	b3584	putative outer membrane protein	66	35	79	47	71	1.11268	1	0.328605	0.496994	0.0622647	0.430666	0.85068	0.441025	1	1	0.471322	0.0622647
2552342	2552352	2553221	2553224	+	amiA	b2435	N-acetylmuramoyl-l-alanine amidase I	53	70	45	52	37	1.21622	1	0.475342	0.275294	0.891493	0.818732	0.0624486	0.755359	1	1	0.218573	0.0624486
1773789	1773789	1774655	1774655	+	ydiB	b1692	quinate/shikimate 5-dehydrogenase, NAD(P)-binding	34	20	53	32	47	1.12766	1	0.34159	0.285141	0.0625781	0.434781	0.617703	0.46764	1	1	0.707413	0.0625781
2799134	2799164	2799613	2800145	+	alaE	b2670	alanine exporter, alanine-inducible, stress-responsive	31	24	49	33	37	1.32432	0.938112	0.514517	0.348541	0.0625976	0.501111	0.893149	0.755359	1	1	0.54971	0.0625976
3413665	3413864	3415021	3415021	+	acrE	b3265	cytoplasmic membrane lipoprotein	30	21	50	30	50	1	1	0.259287	0.41108	0.0628016	0.34329	0.580603	0.265142	1	1	0.513136	0.0628016
4431983	4431983	4431321	4431320	-	ytfE	b4209	iron-sulfur cluster repair protein RIC	51	43	77	46	77	1	1	0.300428	0.835191	0.0629299	0.373421	0.994837	0.282512	1	1	0.406642	0.0629299
	2450590	2450051	2450051	-	yfcP	b2333	putative fimbrial-like adhesin protein	55	34	90	54	77	1.16883	1	0.31759	0.284319	0.0631666	0.419333	0.6749	0.515098	1	1	0.707413	0.0631666
4401953	4402038	4403297	4403297	+	hflK	b4174	modulator for HflB protease specific for phage lambda cII repressor	205	263	102	193	129	0.790698	1	0.9347	0.0631867	0.191132	0.954264	0.376598	0.674891	1	1	0.855252	0.0631867
3407270	3407375	3407617		+	yhdT	b3257	DUF997 family putative inner membrane protein	35	35	43	30	38	1.13158	1	0.540287	0.994525	0.0632366	0.502177	0.475513	0.561528	1	1	0.200002	0.0632366
1071765	1071765	1070965	1070956	-	rutD	b1009	putative aminoacrylate hydrolase, reactive intermediate detoxification	44	17	61	42	54	1.12963	1	0.328109	0.0633693	0.15229	0.410692	0.196385	0.634571	1	1	0.591676	0.0633693
1858833	1858833	1857790	1857790	-	ydjJ	b1774	putative Zn-dependent NAD(P)-binding oxidoreductase	44	27	80	45	67	1.19403	1	0.18701	0.228869	0.063454	0.371314	0.558876	0.522501	1	1	0.789831	0.063454
3815769	3815768	3815127	3815127	-	pyrE	b3642	orotate phosphoribosyltransferase	51	48	74	45	63	1.1746	1	0.31759	0.911522	0.063454	0.408627	0.556123	0.515098	1	1	0.34807	0.063454
1509168	1509286	1509462	1509507	+	hicA	b4532	mRNA interferase toxin of the HicAB toxin-antitoxin system	58	62	95	65	85	1.11765	1	0.50208	0.681252	0.063454	0.497542	0.719304	0.558831	1	1	0.339474	0.063454
1256219	1255952	1253085	1252669	-	ycgV	b1202	putative adhesin	37	31	69	46	67	1.02985	1	0.0635337	0.229884	0.241904	0.259836	0.276399	0.527532	1	1	0.770239	0.0635337
1928860	1928839	1926779	1926697	-	ptrB	b1845	protease II	34	39	66	52	62	1.06452	1	0.0635337	0.373699	0.351959	0.156448	0.591901	0.731643	1	1	0.981018	0.0635337
1983554	1983540	1982554	1982497	-	araH	b4460	fused L-arabinose transporter subunits of ABC superfamily: membrane components	59	33	118	87	119	0.991597	1	0.0635337	0.0879851	0.319134	0.0740265	0.0877803	0.542784	1	1	0.45725	0.0635337
	3783661	3782642	3782641	-	gpsA	b3608	glycerol-3-phosphate dehydrogenase (NAD+)	156	199	101	150	93	1.08602	1	0.53442	0.13624	0.339301	0.80022	0.0635879	0.483646	1	1	0.429111	0.0635879
1746684	1746700	1747005	1747005	+	ydhR	b1667	putative monooxygenase	160	153	87	150	82	1.06098	1	0.627586	0.265098	0.546963	0.626184	0.0635879	0.415991	1	1	0.390553	0.0635879
	204493	205089	205116	+	rnhB	b0183	ribonuclease HII, degrades RNA of DNA-RNA hybrids	66	121	65	74	65	1	1	0.453007	0.176814	0.859324	0.46025	0.0637051	0.938186	1	1	0.0917797	0.0637051
3073691	3073691	3072672	3072672	-	epd	b2927	D-erythrose 4-phosphate dehydrogenase	109	140	67	94	72	0.930556	1	0.606609	0.0742047	0.570729	0.784047	0.0637051	0.755359	1	1	0.254561	0.0637051
3532759	3532818	3534440	3534440	+	pck	b3403	phosphoenolpyruvate carboxykinase	106	140	88	255	100	0.88	1	0.500865	0.402866	0.0638296	0.478979	0.657324	0.4257	1	1	0.718145	0.0638296
144480	144577	145017	145074	+	yadI	b0129	putative PTS Enzyme IIA	40	37	63	41	51	1.23529	1	0.691429	0.700839	0.0639174	0.502177	0.662431	0.617326	1	1	0.396261	0.0639174
2610155	2610164	2610709		+	hyfH	b2488	hydrogenase 4, Fe-S subunit	38	22	61	39	65	0.938462	1	0.674363	0.206464	0.0640198	0.500697	0.289348	0.241625	1	1	0.901519	0.0640198
2233840	2234033	2235271		+	preT	b2146	dihydropyrimidine dehydrogenase, NADH-dependent, subunit N	26	18	50	29	41	1.21951	1	0.22498	0.298958	0.0640807	0.365682	0.712978	0.527223	1	1	0.694753	0.0640807
2726188			2726069	-	rrfG	b2588	5S ribosomal RNA of rrnG operon	164	55	166	143	167	0.994012	1	0.589193	0.0642754	0.219235	0.372657	0.104366	0.691482	1	1	0.404595	0.0642754
	1285139	1285849		+	narJ	b1226	molybdenum-cofactor-assembly chaperone subunit (delta subunit) of nitrate reductase 1	30	18	54	33	45	1.2	1	0.677522	0.148769	0.0643029	0.502971	0.468391	0.5692	1	1	0.975644	0.0643029
2572488	2572450	2572157	2572157	-	eutM	b2457	ethanolamine utilization protein, putative carboxysome structural protein	42	19	57	45	41	1.39024	0.724899	0.530552	0.0644346	0.13821	0.597306	0.537918	0.998173	1	1	0.482377	0.0644346
	4293163	4293546		+	nrfF	b4075	heme lyase (NrfEFG) for insertion of heme into c552, subunit NrfF	83	39	90	57	83	1.08434	1	0.443902	0.337862	0.064484	0.450972	0.728073	0.45086	1	1	0.590374	0.064484
2430274	2430238	2428721	2428675	-	purF	b2312	amidophosphoribosyltransferase	187	241	89	146	94	0.946809	1	0.995571	0.065259	0.287789	0.838362	0.115122	0.586941	1	1	0.45624	0.065259
429496	429505	430476	430487	+	secF	b0409	SecYEG protein translocase auxillary subunit	99	167	83	98	84	0.988095	1	0.410712	0.0998651	0.855003	0.481732	0.0652699	0.845163	1	1	0.172096	0.0652699
3342253	3342273	3342839		+	kdsC	b3198	3-deoxy-D-manno-octulosonate 8-phosphate phosphatase	95	146	74	103	78	0.948718	1	0.469435	0.13142	0.758787	0.498601	0.0653559	0.780776	1	1	0.210362	0.0653559
	300934	298736	298734	-	paoC	b0284	PaoABC aldehyde oxidoreductase, Moco-containing subunit	65	21	79	62	53	1.49057	1	0.318505	0.0653832	0.340017	0.489369	0.306404	0.874161	1	1	0.239213	0.0653832
222655	222645	221614		-	metN	b0199	DL-methionine transporter subunit	154	104	56	66	56	1	1	0.4233	0.134926	0.922459	0.409059	0.0653955	0.840601	1	1	0.172096	0.0653955
3178112	3178115	3179596	3179596	+	tolC	b3035	transport channel	215	208	83	180	111	0.747748	1	0.376643	0.0654035	0.115534	0.5601	0.443121	0.660283	1	1	0.820151	0.0654035
1779835	1779301	1778390	1778057	-	ydiP	b1696	putative DNA-binding transcriptional regulator	35	27	69	41	48	1.4375	1	0.212888	0.341583	0.0655053	0.390522	0.994837	0.721451	1	1	0.608813	0.0655053
	1445687	1445872	1445879	+	ynbE	b1382	lipoprotein	49	43	78	54	62	1.25806	0.938112	0.50618	0.376465	0.0655567	0.499604	0.86788	0.725498	1	1	0.485698	0.0655567
	2611457	2611870	2611899	+	hyfJ	b2490	putative processing element hydrogenase 4	41	25	56	38	54	1.03704	1	0.539687	0.285518	0.0655567	0.501111	0.595213	0.429979	1	1	0.737781	0.0655567
4196882	4196808	4196332	4196276	-	rsd	b3995	stationary phase protein, binds sigma 70 RNA polymerase subunit	93	118	49	127	63	0.777778	1	0.657911	0.0831662	0.0805732	0.896456	0.0655978	0.236063	1	1	0.430283	0.0655978
427647	427647	429494	429495	+	secD	b0408	SecYEG protein translocase auxillary subunit	127	183	70	109	75	0.933333	1	0.672134	0.0658232	0.287319	0.714606	0.13563	0.610805	1	1	0.425682	0.0658232
4437707	4437707	4438645	4439537	+	ytfI	b4215	uncharacterized protein	42	33	61	36	32	1.90625	0.392116	0.303137	0.800018	0.0658564	0.73281	0.419005	0.965935	1	1	0.412999	0.0658564
1202899	1203024	1203224	1203267	+	croE	b1146	e14 prophage; putative DNA-binding transcriptional regulator	14	22	28	20	22	1.27273	1	0.48946	0.881189	0.0658564	0.499604	0.595213	0.62381	1	1	0.23474	0.0658564
351215	351215	352666	352666	+	prpD	b0334	2-methylcitrate dehydratase	51	21	78	67	48	1.625	0.724899	0.194164	0.0659476	0.606489	0.443227	0.656242	0.651333	1	1	0.239213	0.0659476
3640342			3640214	-	-	predicted RNA	antisense: uspA	669	466	188	431	306	0.614379	1	0.338604	0.066245	0.168913	0.492121	0.184612	0.712378	1	1	0.374757	0.066245
54702	54702	53416		-	surA	b0053	peptidyl-prolyl cis-trans isomerase (PPIase)	179	278	104	196	129	0.806202	1	0.781196	0.0663542	0.218884	0.864003	0.358828	0.690957	1	1	0.840456	0.0663542
3026872			3026740	-	-	predicted RNA	antisense: guaD	225	87	183	167	312	0.586538	1	0.701679	0.340068	0.346548	0.424883	0.0664742	0.094219	1	1	0.937389	0.0664742
3776661	3776665	3777027	3777038	+	yibL	b3602	ribosome-associated DUF2810 family protein	103	122	72	88	66	1.09091	1	0.563936	0.285021	0.839253	0.957268	0.0665268	0.806736	1	1	0.176296	0.0665268
1148755	1148759	1149712	1149727	+	fabH	b1091	3-oxoacyl-[acyl-carrier-protein] synthase III	135	197	91	110	101	0.90099	1	0.492451	0.0665522	0.792831	0.497443	0.114631	0.957476	1	1	0.163612	0.0665522
	4289808	4290479		+	nrfC	b4072	formate-dependent nitrite reductase, 4Fe4S subunit	36	30	53	33	47	1.12766	1	0.649756	0.812469	0.0666645	0.526719	0.799109	0.485385	1	1	0.406642	0.0666645
3913817	3913668	3911839	3911839	-	glmS	b3729	L-glutamine:D-fructose-6-phosphate aminotransferase	259	315	94	177	108	0.87037	1	0.762223	0.067042	0.365879	0.474298	0.273854	0.954986	1	1	0.89563	0.067042
151599	151599	151003	151003	-	yadK	b0136	putative fimbrial-like adhesin protein	35	19	48	31	31	1.54839	0.724899	0.650445	0.236776	0.0671102	0.622207	0.999974	0.844535	1	1	0.850642	0.0671102
537633	537633	539087	539087	+	ybbW	b0511	putative allantoin transporter	47	28	75	42	61	1.22951	1	0.169343	0.252163	0.0671669	0.369245	0.606647	0.524757	1	1	0.725641	0.0671669
	728732	727059	727059	-	kdpA	b0698	potassium translocating ATPase, subunit A	29	16	62	38	42	1.47619	1	0.0688741	0.0673106	0.135872	0.376049	0.491351	0.836638	1	1	0.686752	0.0673106
	1829734	1828256		-	astD	b1746	succinylglutamic semialdehyde dehydrogenase	51	20	73	65	69	1.05797	1	0.23017	0.0673106	0.654391	0.390522	0.105307	0.845163	1	1	0.218573	0.0673106
4175830	4175944	4177128	4177128	+	tufB	b3980	translation elongation factor EF-Tu 2	3592	4141	543	1704	887	0.612176	1	0.876352	0.067363	0.811841	0.838793	0.556123	0.837706	1	1	0.92419	0.067363
2863593	2863593	2864231	2864235	+	ygbL	b2738	putative class II aldolase	37	26	61	37	49	1.2449	1	0.675656	0.360548	0.0674041	0.517193	0.920936	0.609435	1	1	0.562637	0.0674041
2446387	2446384	2445560		-	mepA	b2328	murein DD-endopeptidase	80	118	59	82	64	0.921875	1	0.462681	0.109035	0.697795	0.49465	0.06747	0.787053	1	1	0.232773	0.06747
1606976	1606999	1607289	1607340	+	lsrG	b1518	autoinducer-2 (AI-2) degrading protein LsrG	41	37	81	56	67	1.20896	1	0.483512	0.310836	0.0675515	0.496448	0.893149	0.627811	1	1	0.678693	0.0675515
3163505	3163481	3162744	3162744	-	plsC	b3018	1-acyl-sn-glycerol-3-phosphate acyltransferase	56	78	49	47	44	1.11364	1	0.479656	0.28134	0.51031	0.646254	0.0876128	0.966116	1	1	0.0676814	0.0676814
533905	533916	535697	535709	+	gcl	b0507	glyoxylate carboligase	46	28	75	42	68	1.10294	1	0.187284	0.226132	0.0678246	0.390522	0.301819	0.353633	1	1	0.827139	0.0678246
4143995	4143995	4146292		+	pflD	b3951	putative glycine radical domain-containing pyruvate formate-lyase	24	17	37	21	29	1.27586	1	0.225216	0.503344	0.0680542	0.390522	0.978025	0.595827	1	1	0.465035	0.0680542
4428923	4428935	4429555	4429744	+	fklB	b4207	FKBP-type peptidyl-prolyl cis-trans isomerase (rotamase)	189	229	108	158	128	0.84375	1	0.744083	0.0683961	0.497764	0.706077	0.109502	0.803322	1	1	0.279962	0.0683961
359436	358690	357791	357610	-	cynR	b0338	transcriptional activator of cyn operon; autorepressor	32	25	55	33	36	1.52778	0.91168	0.332696	0.530006	0.0686973	0.498079	0.619445	0.807981	1	1	0.462978	0.0686973
511480	511641	512573	512573	+	glsA	b0485	glutaminase 1	54	22	79	46	74	1.06757	1	0.253256	0.108302	0.0686973	0.389775	0.206755	0.39259	1	1	0.925929	0.0686973
1754505	1754477	1753851	1753851	-	ydhY	b1674	putative 4Fe-4S ferridoxin-type protein; FNR, Nar, NarP-regulated protein; putative subunit of YdhYVWXUT oxidoreductase complex	29	29	61	38	53	1.15094	1	0.724754	0.545443	0.0686973	0.498154	0.994837	0.515098	1	1	0.44843	0.0686973
1298572	1298598	1299245	1299433	+	ychE	b1242	UPF0056 family inner membrane protein	36	30	73	44	57	1.2807	1	0.91197	0.366857	0.0686973	0.687735	0.936058	0.623541	1	1	0.558242	0.0686973
1547383	1547401	1550448	1550460	+	fdnG	b1474	formate dehydrogenase-N, alpha subunit, nitrate-inducible	34	31	64	41	59	1.08475	1	0.0688741	0.258527	0.206613	0.309482	0.333701	0.524749	1	1	0.925929	0.0688741
1957007	1957007	1954578	1952250	-	torZ	b1872	trimethylamine N-oxide reductase system III, catalytic subunit	39	21	74	46	70	1.05714	1	0.0688741	0.0932113	0.174133	0.301243	0.129168	0.468622	1	1	0.568857	0.0688741
4061158	4061165	4062145	4062145	+	yihM	b3873	putative sugar phosphate isomerase	36	29	47	29	39	1.20513	1	0.350281	0.967277	0.0689696	0.441987	0.550763	0.574401	1	1	0.370742	0.0689696
	2111976	2111077	2111077	-	rfbD	b2040	dTDP-4-dehydrorhamnose reductase subunit, NAD(P)-binding, of dTDP-L-rhamnose synthase	87	142	88	89	76	1.15789	1	0.360666	0.214529	0.875735	0.483527	0.0689927	0.837406	1	1	0.18018	0.0689927
4200554	4200566	4201261	4201465	+	yjaH	b4001	DUF1481 family putative lipoprotein	58	78	53	71	42	1.2619	1	0.471659	0.319417	0.867331	0.811872	0.0689927	0.510195	1	1	0.367147	0.0689927
963683			961741	-	-	predicted RNA	antisense: rpsA cmk	1682	2515	331	971	552	0.599638	1	0.857932	0.0690568	0.807036	0.466126	0.673147	0.833153	1	1	0.819384	0.0690568
1192666	1192631	1191990	1191987	-	hflD	b1132	putative lysogenization regulator	107	147	69	98	80	0.8625	1	0.498805	0.0788298	0.681922	0.510442	0.0694454	0.828895	1	1	0.184803	0.0694454
2837434	2837425	2835173	2834933	-	hypF	b2712	carbamoyl phosphate phosphatase and maturation protein for [NiFe] hydrogenases	66	23	84	65	62	1.35484	1	0.307562	0.0695126	0.367468	0.458446	0.246492	0.938103	1	1	0.242544	0.0695126
2947607			2947683	+	metV	b2816	Met tRNA	275	346	178	225	202	0.881188	1	0.651097	0.255839	0.742593	0.995478	0.0788809	0.999321	1	1	0.0695435	0.0695435
	338325	339743	339743	+	yahG	b0321	DUF1116 family protein	64	22	83	60	69	1.2029	1	0.264144	0.0697269	0.301787	0.443227	0.19613	0.800763	1	1	0.429111	0.0697269
1592585	1592442	1592176		-	hipB	b1508	antitoxin of HipAB toxin-antitoxin system	27	24	45	32	29	1.55172	0.661969	0.501563	0.334163	0.0698481	0.502472	0.749343	0.891757	1	1	0.614511	0.0698481
2601195	2601201	2601818		+	hyfA	b2481	hydrogenase 4, 4Fe-4S subunit	46	22	65	40	65	1	1	0.425198	0.173688	0.0698559	0.461578	0.281115	0.336148	1	1	0.975781	0.0698559
1764017	1764009	1762522	1762522	-	sufB	b1683	component of SufBCD Fe-S cluster assembly scaffold	51	52	90	99	109	0.825688	1	0.120782	0.371809	0.994732	0.0699906	0.316449	0.664893	1	1	0.42975	0.0699906
3801999	3801999	3800983	3800966	-	waaJ	b3626	UDP-D-glucose:(galactosyl)lipopolysaccharide glucosyltransferase	37	46	45	35	25	1.8	0.428265	0.372337	0.482102	0.259276	0.979045	0.0701507	0.738976	1	1	0.226574	0.0701507
1747006	1747131	1748735	1751135	+	ydhS	b1668	putative oxidoreductase	38	33	74	65	68	1.08824	1	0.070407	0.339503	0.63932	0.166549	0.509304	0.855766	1	1	0.714311	0.070407
3362807	3362807	3365188	3366760	+	yhcD	b3216	putative outer membrane fimbrial subunit usher protein	26	23	50	28	37	1.35135	1	0.070407	0.361423	0.0823552	0.348068	0.977788	0.664548	1	1	0.510936	0.070407
3435163	3435207	3436496	3436496	+	rsmB	b3289	16S rRNA m(5)C967 methyltransferase, SAM-dependent	48	84	46	57	46	1	1	0.370732	0.146227	0.848318	0.425981	0.0704505	0.810291	1	1	0.226781	0.0704505
359459	359489	359959	359959	+	cynS	b0340	cyanate aminohydrolase	26	21	51	35	36	1.41667	0.82418	0.483687	0.245872	0.0705368	0.499604	0.947371	0.822887	1	1	0.857071	0.0705368
81147			81209	+	-	predicted RNA	antisense: leuB	393	439	165	464	353	0.467422	1	0.92326	0.0706048	0.0923544	0.662121	0.306483	0.811335	1	1	0.400387	0.0706048
3785225	3785260	3786804	3786804	+	gpmM	b3612	phosphoglycero mutase III, cofactor-independent	157	143	82	76	65	1.26154	1	0.828603	0.277298	0.711334	0.475907	0.0707921	0.861745	1	1	0.175328	0.0707921
1067715	1067708	1067112	1067112	-	wrbA	b1004	NAD(P)H:quinone oxidoreductase	75	53	115	206	160	0.71875	1	0.262074	0.543745	0.187255	0.123242	0.221691	0.776407	1	1	0.0708919	0.0708919
77619	77621	78799	79145	+	setA	b0070	broad specificity sugar efflux system	84	41	114	154	122	0.934426	1	0.242456	0.214529	0.517958	0.389775	0.187645	0.816794	1	1	0.070894	0.070894
	2299578	2298715		-	napH	b2204	ferredoxin-type protein essential for electron transfer from ubiquinol to periplasmic nitrate reductase (NapAB)	44	18	65	40	48	1.35417	1	0.298073	0.0710158	0.0830134	0.441987	0.426876	0.719711	1	1	0.770239	0.0710158
2909694	2909666	2908029	2907945	-	pyrG	b2780	CTP synthetase	229	349	105	179	140	0.75	1	0.472856	0.0710158	0.417519	0.501111	0.799109	0.776407	1	1	0.543723	0.0710158
2656736	2656736	2656536	2656536	-	iscX	b2524	Iron binding protein associated with IscS; putative molecular adaptor of IscS function	153	178	97	117	99	0.979798	1	0.715433	0.269065	0.763145	0.846256	0.0710479	0.900506	1	1	0.11061	0.0710479
26276	26277	27227	27235	+	ispH	b0029	4-hydroxy-3-methylbut-2-enyl diphosphate reductase, 4Fe-4S protein	104	145	78	98	76	1.02632	1	0.448037	0.134468	0.763218	0.611263	0.0710907	0.776407	1	1	0.248574	0.0710907
2888330	2888312	2887578	2887555	-	cysH	b2762	phosphoadenosine phosphosulfate reductase; PAPS reductase, thioredoxin dependent	232	283	130	144	137	0.948905	1	0.901531	0.0712568	0.936697	0.779818	0.0971897	0.996704	1	1	0.109406	0.0712568
280809	279875	279600		-	insA	b0265	IS1 repressor TnpA	57	126	116	78	70	1.65714	0.553847	0.740068	0.486349	0.0981968	0.501111	0.0763985	0.993569	1	1	0.0718704	0.0718704
37874	37824	36271	36163	-	caiC	b0037	putative crotonobetaine/carnitine-CoA ligase	41	26	64	36	49	1.30612	1	0.187284	0.332758	0.0719926	0.390522	0.86788	0.61445	1	1	0.583659	0.0719926
4109925	4109930	4110685	4110685	+	cdh	b3918	CDP-diacylglycerol phosphotidylhydrolase	52	44	60	37	54	1.11111	1	0.390218	0.600663	0.0720929	0.449034	0.529758	0.476217	1	1	0.272475	0.0720929
2722700	2722727	2724082	2724127	+	pssA	b2585	phosphatidylserine synthase (CDP-diacylglycerol-serine O-phosphatidyltransferase)	93	150	70	133	75	0.933333	1	0.460031	0.0723812	0.107334	0.48954	0.117756	0.38729	1	1	0.529849	0.0723812
	3307860	3305971	3305924	-	deaD	b3162	ATP-dependent RNA helicase	105	323	95	128	111	0.855856	1	0.57987	0.0726398	0.536442	0.475323	0.315623	0.776407	0.134283	1	0.260968	0.0726398
	1830765	1829731		-	astA	b1747	arginine succinyltransferase	56	21	80	70	73	1.09589	1	0.237103	0.0726901	0.598364	0.385894	0.164061	0.911662	1	1	0.271539	0.0726901
1290079	1289132	1288674	1288672	-	ychJ	b1233	UPF0225 family protein	84	115	70	80	62	1.12903	1	0.502419	0.284226	0.775189	0.763557	0.0727325	0.831908	1	1	0.158041	0.0727325
2077039	2077112	2077480	2077480	+	cbeA	b2004	CP4-44 prophage; cytoskeleton bundling-enhancing factor A; CbtA antitoxin	58	35	86	56	106	0.811321	1	0.657817	0.277298	0.0764172	0.500697	0.234763	0.0728177	1	1	0.761972	0.0728177
3343944	3343944	3344669	3344695	+	lptB	b3201	lipopolysaccharide export ABC transporter ATP-binding protein of the LptBFGC export complex	119	162	77	110	92	0.836957	1	0.539297	0.0730594	0.594185	0.634835	0.0921884	0.828895	1	1	0.240155	0.0730594
4421708	4421708	4422172	4422185	+	ulaC	b4195	L-ascorbate-specific enzyme IIA component of PTS	42	35	67	43	63	1.06349	1	0.68041	0.537758	0.0730878	0.501111	0.939973	0.446443	1	1	0.433533	0.0730878
3423787			3423668	-	rrfD	b3274	5S ribosomal RNA of rrnD operon	179	62	175	149	201	0.870647	1	0.604541	0.114734	0.223795	0.514071	0.0732286	0.524749	1	1	0.495742	0.0732286
3936254	3936278	3937168	3937246	+	rbsB	b3751	D-ribose transporter subunit	86	140	75	153	76	0.986842	1	0.40632	0.128886	0.0895346	0.472005	0.0733107	0.158501	1	1	0.888738	0.0733107
1977844	1977844	1977266	1977266	-	flhC	b1891	flagellar class II regulon transcriptional activator, with FlhD	100	148	82	92	81	1.01235	1	0.446186	0.170832	0.924792	0.499604	0.0733107	0.91148	1	1	0.124479	0.0733107
1861588	1861332	1860256	1860256	-	ydjL	b1776	putative Zn-dependent NAD(P)-binding oxidoreductase	62	39	116	66	102	1.13725	1	0.0734947	0.184017	0.0841999	0.20455	0.286923	0.429979	1	1	0.951446	0.0734947
1205402	1205549	1205731	1206614	+	ymfR	b1150	e14 prophage; uncharacterized protein	72	35	98	69	100	0.98	1	0.530552	0.115591	0.0735926	0.499604	0.179178	0.39924	1	1	0.825089	0.0735926
	2348514	2348768	2349362	+	yfaE	b2236	ferredoxin involved with ribonucleotide reductase diferric-tyrosyl radical (Y*) cofactor maintenance	78	88	63	61	52	1.21154	1	0.623277	0.420885	0.329058	0.77369	0.0739459	0.926859	1	1	0.0959695	0.0739459
1702218	1702233	1703234	1704229	+	add	b1623	adenosine deaminase	59	51	92	119	117	0.786325	1	0.199966	0.707035	0.640215	0.0740265	0.338901	0.927556	1	1	0.430283	0.0740265
1170517	1170374	1169412	1169142	-	ldtC	b1113	L,D-transpeptidase linking Lpp to murein	21	20	46	28	37	1.24324	1	0.698862	0.419	0.0740526	0.500554	0.946637	0.600459	1	1	0.515724	0.0740526
1092605	1092289	1089866	1089866	-	pgaA	b1024	biofilm adhesin polysaccharide PGA secretin; OM porin; poly-beta-1,6-N-acetyl-D-glucosamine export protein	36	24	70	40	63	1.11111	1	0.0740921	0.176814	0.113075	0.345132	0.246562	0.401019	1	1	0.930496	0.0740921
580673	580834	581379	581467	+	nohD	b0560	DLP12 prophage; DNA packaging protein	66	95	155	114	126	1.23016	1	0.074123	0.88626	0.300548	0.240643	0.675649	0.831908	1	1	0.47292	0.074123
1579342	1579342	1577657	1577620	-	yddA	b1496	putative multidrug transporter subunit of ABC superfamily, membrane component/ATP-binding component	31	35	62	36	50	1.24	1	0.0743595	0.630624	0.0809858	0.311568	0.911331	0.569974	1	1	0.419218	0.0743595
571454	571454	572251	572360	+	ybcM	b0546	DLP12 prophage; putative DNA-binding transcriptional regulator	29	37	60	37	34	1.76471	0.532185	0.838568	0.961299	0.0744425	0.528308	0.393405	0.97005	1	1	0.371305	0.0744425
3624378	3624378	3625514	3626412	+	yhhI	b3484	putative transposase	46	34	73	42	40	1.825	0.502981	0.220545	0.521028	0.0744993	0.472037	0.514607	0.973445	1	1	0.465035	0.0744993
1751727	1751724	1751077	1751077	-	ydhW	b1672	FNR, Nar, NarP-regulated protein; putative subunit of YdhYVWXUT oxidoreductase complex	28	21	53	34	39	1.35897	1	0.707351	0.272142	0.0747539	0.501807	0.906032	0.738355	1	1	0.766128	0.0747539
1777196	1777196	1778347	1778531	+	ydiO	b1695	putative acyl-CoA dehydrogenase	32	25	62	37	55	1.12727	1	0.198349	0.367158	0.0752255	0.347532	0.721878	0.484572	1	1	0.583203	0.0752255
1853979	1853979	1852621	1850864	-	ydjE	b1769	putative transporter	42	34	82	47	66	1.24242	1	0.0753075	0.305514	0.0798047	0.311568	0.737946	0.550995	1	1	0.636309	0.0753075
679508	679508	680215		+	ybeU	b0648	DUF1266 family protein	38	26	67	41	59	1.13559	1	0.385527	0.298958	0.0762286	0.48954	0.676956	0.517028	1	1	0.715112	0.0762286
2471569	2471517	2471077	2470857	-	yfdK	b2354	CPS-53 (KpLE1) prophage; conserved protein	29	33	59	40	46	1.28261	1	0.482845	0.572645	0.0762286	0.497588	0.693057	0.713675	1	1	0.416772	0.0762286
3613667	3613667	3615241		+	nikA	b3476	nickel-binding, heme-binding periplasmic protein	44	26	64	36	45	1.42222	1	0.218572	0.327423	0.0763448	0.405298	0.961989	0.713675	1	1	0.60427	0.0763448
2568107	2568107	2566881		-	eutH	b2452	ethanolamine transporter	72	25	90	69	69	1.30435	1	0.28024	0.0763462	0.398011	0.468243	0.341601	0.960626	1	1	0.406049	0.0763462
	3177280	3176858	3176858	-	yqiB	b3033	DUF1249 protein YqiB	68	100	67	79	55	1.21818	1	0.694899	0.341589	0.811953	0.957986	0.0763985	0.71805	1	1	0.244996	0.0763985
3318575	3318637	3319980	3320156	+	argG	b3172	argininosuccinate synthetase	398	378	149	147	120	1.24167	1	0.769256	0.291498	0.581729	0.498079	0.0763985	0.877002	1	1	0.159286	0.0763985
2849925	2849849	2849238		-	hycB	b2724	hydrogenase 3, Fe-S subunit	27	15	46	30	39	1.17949	1	0.515262	0.116965	0.0764172	0.500554	0.374515	0.577743	1	1	0.859917	0.0764172
2838253	2838105	2837578	2837462	-	hydN	b2713	formate dehydrogenase-H, [4Fe-4S] ferredoxin subunit	33	18	54	37	40	1.35	0.946927	0.700594	0.122773	0.0765951	0.502177	0.613415	0.811694	1	1	0.834298	0.0765951
4283212	4287764	4289200	4289200	+	nrfA	b4070	nitrite reductase, formate-dependent, cytochrome	53	37	70	40	52	1.34615	1	0.263834	0.614571	0.0765951	0.447118	0.791191	0.661869	1	1	0.429111	0.0765951
2743610	2743625	2744107	2744144	+	yfiB	b2605	OM lipoprotein putative positive effector of YfiN activity	47	60	52	39	47	1.10638	1	0.617244	0.481983	0.134844	0.53129	0.291112	0.660283	1	1	0.0766386	0.0766386
1210240	1210346	1211179	1211179	+	mcrA	b1159	putative 5-methylcytosine/5-hydroxymethylcytosine-specific restriction nuclease; 5-methylcytosine DNA binding protein; e14 prophage gene	44	34	75	46	58	1.2931	1	0.24528	0.517696	0.0767073	0.401256	0.534641	0.646628	1	1	0.473977	0.0767073
	3803058	3802039	3802032	-	waaR	b3627	UDP-D-galactose:(glucosyl)lipopolysaccharide-alpha-1,3-D-galactosyltransferase	42	57	50	38	31	1.6129	0.797872	0.365016	0.410849	0.261681	0.738873	0.07672	0.872968	1	1	0.134083	0.07672
2153320	2153128	2152469		-	yegL	b2073	VMA domain protein	55	28	92	56	71	1.29577	1	0.255509	0.151657	0.0767775	0.401256	0.522741	0.63168	1	1	0.98625	0.0767775
3957932	3957820	3956927	3950280	-	ilvY	b3773	transcriptional activator of ilvC; autorepressor	41	26	50	31	34	1.47059	0.957184	0.374087	0.707356	0.0769708	0.518362	0.550763	0.789786	1	1	0.431195	0.0769708
1421119	1421119	1421976	1421982	+	ydaU	b1359	Rac prophage; conserved protein	39	28	69	42	48	1.4375	1	0.239321	0.382516	0.0769708	0.409059	0.938233	0.774001	1	1	0.583293	0.0769708
246506	246502	246242	246240	-	dinJ	b0226	antitoxin of YafQ-DinJ toxin-antitoxin system	78	176	80	157	97	0.824742	1	0.589965	0.147303	0.417519	0.50792	0.0771633	0.577743	1	1	0.32476	0.0771633
3730574	3731131	3732123	3732123	+	xylF	b3566	D-xylose transporter subunit	56	45	80	47	70	1.14286	1	0.244227	0.775182	0.0771835	0.390522	0.889567	0.500193	1	1	0.413891	0.0771835
3900577	3900577	3899408	3899394	-	yieL	b3719	putative xylanase	32	24	50	30	45	1.11111	1	0.283654	0.644685	0.0771835	0.390522	0.982336	0.479661	1	1	0.447032	0.0771835
1392996	1391853	1390933	1390599	-	ycjY	b1327	S9 homolog non-peptidase family protein	32	33	64	39	59	1.08475	1	0.246424	0.686024	0.0771993	0.385894	0.99415	0.451967	1	1	0.439382	0.0771993
4505276	4505287	4506405	4506405	+	yjhC	b4280	putative oxidoreductase	56	41	90	51	48	1.875	0.404654	0.181964	0.461784	0.0772835	0.463408	0.501936	0.970853	1	1	0.480638	0.0772835
4260032	4260321	4260575	4260575	+	yjbL	b4047	uncharacterized protein	59	31	59	42	35	1.68571	0.482116	0.578429	0.34997	0.0772835	0.798804	0.542712	0.971871	1	1	0.586868	0.0772835
	1458264	1459052	1459052	+	paaG	b1394	1,2-epoxyphenylacetyl-CoA isomerase, oxepin-CoA-forming	47	31	76	46	77	0.987013	1	0.262406	0.386923	0.0777576	0.357926	0.542727	0.293577	1	1	0.580633	0.0777576
3946957			3947032	+	trpT	b3761	Trp tRNA	69	102	70	72	63	1.11111	1	0.551876	0.312687	0.485461	0.519873	0.150959	0.927959	1	1	0.0780409	0.0780409
	2274179	2275273		+	yejB	b2178	microcin C transporter YejABEF, permease subunit; ABC family	31	35	56	34	51	1.09804	1	0.226831	0.973809	0.0784073	0.332923	0.719304	0.466542	1	1	0.366842	0.0784073
2128903	2128888	2128340	2128315	-	wcaF	b2054	putative acyl transferase	22	16	42	29	31	1.35484	0.936649	0.483512	0.188383	0.0784407	0.498601	0.767268	0.789786	1	1	0.991869	0.0784407
1371909	1371909	1373201	1373221	+	ycjN	b1310	putative ABC superfamily sugar transporter periplasmic-binding protein	35	24	68	39	52	1.30769	1	0.164151	0.26535	0.0792854	0.384399	0.762817	0.638748	1	1	0.756054	0.0792854
1423723	1423782	1425239	1425239	+	trkG	b1363	Rac prophage; potassium transporter subunit	36	37	67	38	42	1.59524	0.800457	0.126047	0.680246	0.0793619	0.401256	0.49607	0.837706	1	1	0.420502	0.0793619
	3521449	3521009		-	hofO	b3393	DNA catabolic protein	64	32	81	52	72	1.125	1	0.471382	0.26535	0.0793619	0.500554	0.621308	0.527532	1	1	0.804158	0.0793619
3461023	3461023	3461460	3461460	+	gspG	b3328	pseudopilin, cryptic, general secretion pathway	45	28	64	43	63	1.01587	1	0.669391	0.302813	0.0793619	0.502177	0.585697	0.425857	1	1	0.715409	0.0793619
1225361	1225361	1224549	1224546	-	minD	b1175	membrane ATPase of the MinC-MinD-MinE system	176	175	92	189	118	0.779661	1	0.996589	0.124629	0.0793619	0.533809	0.274462	0.484572	1	1	0.925921	0.0793619
3055456	3055444	3054866	3054850	-	ygfB	b2909	UPF0149 family protein	173	196	94	124	110	0.854545	1	0.810448	0.0794095	0.758574	0.963745	0.080289	0.876203	1	1	0.170691	0.0794095
1632642	1630913	1629453	1629318	-	ydfI	b1542	putative NAD-dependent D-mannonate oxidoreductase	32	32	63	36	58	1.08621	1	0.133209	0.61156	0.0794766	0.278748	0.893922	0.425857	1	1	0.440726	0.0794766
2659548	2659467	2658952	2658952	-	hscB	b2527	HscA co-chaperone, J domain-containing protein Hsc56; IscU-specific chaperone HscAB	77	115	59	85	63	0.936508	1	0.528266	0.190051	0.821125	0.578862	0.0797163	0.776438	1	1	0.222564	0.0797163
	2295586	2295377		-	ccmD	b2198	cytochrome c biogenesis protein	69	31	87	62	68	1.27941	0.921819	0.541029	0.110661	0.0798825	0.567186	0.536397	0.780228	1	1	0.785126	0.0798825
3260123	3260110	3259721	3259654	-	tdcF	b3113	putative reactive intermediate deaminase	54	35	64	44	59	1.08475	1	0.638235	0.521028	0.0798825	0.514078	0.980561	0.527532	1	1	0.433671	0.0798825
1805158	1805165	1805272	1805397	+	yniD	b4535	uncharacterized protein	48	38	75	55	75	1	1	0.509761	0.270153	0.0798861	0.497588	0.533918	0.465971	1	1	0.829904	0.0798861
3400043	3399978	3398875		-	mreC	b3250	cell wall structural complex MreBCD transmembrane component MreC	102	158	75	98	90	0.833333	1	0.453421	0.0800093	0.650806	0.472005	0.186855	0.94856	1	1	0.243127	0.0800093
3020490	3020540	3021319		+	ygfM	b2880	putative oxidoreductase	47	35	64	40	64	1	1	0.330657	0.825304	0.0800939	0.390522	0.991566	0.326731	1	1	0.418185	0.0800939
3090253	3090347	3091054	3091133	+	endA	b2945	DNA-specific endonuclease I	41	29	56	35	50	1.12	1	0.409745	0.708771	0.0801852	0.466212	0.912583	0.515098	1	1	0.431581	0.0801852
4605678	4605663	4604875	4604777	-	fhuF	b4367	ferric iron reductase involved in ferric hydroximate transport	227	569	192	544	322	0.596273	1	0.50697	0.0801934	0.0927377	0.390522	0.762817	0.827636	1	1	0.691436	0.0801934
4129835	4129835	4132267	4132329	+	metL	b3940	Bifunctional aspartokinase/homoserine dehydrogenase 2	87	115	57	69	48	1.1875	1	0.775473	0.263003	0.783782	0.679906	0.080289	0.620514	1	1	0.391898	0.080289
1346770	1346742	1344757	1344615	-	gmr	b1285	cyclic-di-GMP phosphodiesterase; csgD regulator; modulator of Rnase II stability	38	36	72	63	64	1.125	1	0.0804766	0.323008	0.473841	0.308208	0.490863	0.878273	1	1	0.67972	0.0804766
1772293	1772512	1773777	1773788	+	ydiN	b1691	MFS transporter superfamily protein	34	28	68	40	58	1.17241	1	0.150265	0.364912	0.0805732	0.345132	0.767221	0.524757	1	1	0.573803	0.0805732
2492003	2491950	2490256	2490217	-	oxc	b2373	oxalyl CoA decarboxylase, ThDP-dependent	29	24	52	30	45	1.15556	1	0.170444	0.485169	0.0809594	0.357672	0.854565	0.504481	1	1	0.482377	0.0809594
2968981	2968977	2968447	2968435	-	rppH	b2830	RNA pyrophosphohydrolase	144	219	106	155	128	0.828125	1	0.467125	0.0811007	0.550236	0.472037	0.109384	0.821096	1	1	0.272954	0.0811007
957617	957653	958741	958741	+	serC	b0907	3-phosphoserine/phosphohydroxythreonine aminotransferase	532	608	175	483	305	0.57377	1	0.769428	0.0811007	0.187943	0.483527	0.785288	0.828895	1	1	0.706471	0.0811007
354894	354922	356181		+	codB	b0336	cytosine transporter	251	209	105	99	90	1.16667	1	0.436812	0.236776	0.692085	0.403747	0.0813539	0.971222	1	1	0.109406	0.0813539
1391872	1391991	1392890	1392893	+	pgrR	b1328	murein peptide degradation regulator	42	40	75	45	63	1.19048	1	0.23017	0.74797	0.0815082	0.390522	0.854565	0.547537	1	1	0.427933	0.0815082
1550461	1550461	1551345		+	fdnH	b1475	formate dehydrogenase-N, Fe-S (beta) subunit, nitrate-inducible	55	39	93	54	84	1.10714	1	0.209644	0.419	0.0815166	0.365682	0.717805	0.446443	1	1	0.525974	0.0815166
2741357	2741360	2741725	2741725	+	yfiL	b2602	lipoprotein	29	23	52	85	49	1.06122	1	0.492451	0.268862	0.753042	0.494756	0.620008	0.497593	1	1	0.0815992	0.0815992
264255	264247	264026	264011	-	ykfH	b4504	uncharacterized protein	52	32	63	45	64	0.984375	1	0.542861	0.319633	0.0820309	0.499604	0.704152	0.46764	1	1	0.694753	0.0820309
4360031	4360031	4358697	4358697	-	cadB	b4132	putative lysine/cadaverine transporter	53	50	79	45	68	1.16176	1	0.202785	0.770604	0.082275	0.381142	0.918297	0.491237	1	1	0.370972	0.082275
1799387	1799270	1799226	1799120	-	pheM	b1715	phenylalanyl-tRNA synthetase operon leader peptide	24	59	40	70	33	1.21212	1	0.476111	0.137777	0.390615	0.500554	0.0823667	0.461515	1	1	0.366842	0.0823667
2653855			2654158	+	ryfA	b4440	-	22	38	43	31	21	2.04762	0.177298	0.483687	0.645211	0.0825915	0.526756	0.0833431	0.756239	1	1	0.193693	0.0825915
1216748	1216748	1216996	1217209	+	ymgC	b1167	Blue light, low temperature and stress induced protein	25	17	37	27	26	1.42308	0.800457	0.516747	0.240217	0.0825915	0.502971	0.925157	0.831908	1	1	0.923	0.0825915
4189720	4189786	4190325	4190341	+	yjaZ	b3989	stationary phase growth adaptation protein	36	41	64	42	43	1.48837	0.845378	0.691646	0.938166	0.0825915	0.509211	0.461396	0.831908	1	1	0.371222	0.0825915
	2851864	2852136		+	hypC	b2728	hydrogenase maturation protein	33	29	48	35	39	1.23077	0.974873	0.515327	0.426976	0.0825915	0.500554	0.822203	0.747938	1	1	0.465008	0.0825915
3817667	3817760	3818584	3818821	+	dinD	b3645	DNA damage-inducible protein	50	49	75	46	58	1.2931	1	0.284722	0.912021	0.0825915	0.432899	0.511838	0.656435	1	1	0.351681	0.0825915
3100739	3100728	3099682	3099682	-	ansB	b2957	periplasmic L-asparaginase 2	42	31	56	34	53	1.0566	1	0.318095	0.86511	0.0825915	0.408627	0.944813	0.40546	1	1	0.41075	0.0825915
4547742	4547742	4548272	4548284	+	fimF	b4318	minor component of type 1 fimbriae	67	39	78	49	62	1.25806	1	0.395262	0.613361	0.0825915	0.475323	0.824207	0.640439	1	1	0.451208	0.0825915
3252905	3252911	3253267	3253335	+	yhaI	b3104	DUF805 family inner membrane protein	74	41	78	53	65	1.2	1	0.766255	0.527164	0.0825915	0.965621	0.875142	0.637997	1	1	0.440862	0.0825915
352667	352706	354592	354592	+	prpE	b0335	propionate--CoA ligase	69	24	86	69	58	1.48276	1	0.293602	0.0825987	0.326345	0.476682	0.324081	0.883917	1	1	0.259211	0.0825987
2707128	2707124	2705325	2705311	-	lepA	b2569	back-translocating elongation factor EF4, GTPase	123	173	70	112	82	0.853659	1	0.651428	0.0826522	0.261942	0.766192	0.270422	0.666296	1	1	0.455528	0.0826522
262871			262946	+	thrW	b0244	Thr tRNA	73	112	67	84	61	1.09836	1	0.563936	0.246815	0.854814	0.568349	0.0827202	0.8364	1	1	0.125046	0.0827202
2563980	2563980	2564372	2564490	+	yffR	b2449	CPZ-55 prophage; uncharacterized protein	46	30	80	53	44	1.81818	0.386291	0.703302	0.230674	0.0828796	0.536872	0.787295	0.903242	1	1	0.908946	0.0828796
2111076	2111019	2110138		-	rfbA	b2039	glucose-1-phosphate thymidylyltransferase	75	103	74	70	58	1.27586	1	0.35488	0.298586	0.707368	0.501111	0.0830628	0.831908	1	1	0.197608	0.0830628
2682747	2682745	2679464	2679464	-	yphG	b2549	DUF4380 domain-containing TPR repeat protein	57	23	68	54	71	0.957746	1	0.395984	0.103809	0.461495	0.432899	0.0832173	0.678037	1	1	0.264381	0.0832173
3173140	3173142	3173456	3178091	+	ygiN	b3029	quinol monooxygenase	156	186	89	150	104	0.855769	1	0.577618	0.151117	0.573328	0.89493	0.0832173	0.691482	1	1	0.284085	0.0832173
3512344	3512344	3511439	3511439	-	yhfZ	b3383	putative DNA-binding transcriptional regulator	45	33	62	38	45	1.37778	1	0.317288	0.780883	0.0833104	0.458861	0.562176	0.733242	1	1	0.426211	0.0833104
820793	820793	821506	824532	+	ybhM	b0787	UPF0005 family inner membrane protein	29	30	62	39	49	1.26531	1	0.691127	0.550619	0.0833133	0.501111	0.871495	0.660283	1	1	0.464687	0.0833133
	81958	80867	80867	-	leuB	b0073	3-isopropylmalate dehydrogenase, NAD(+)-dependent	347	410	144	430	303	0.475248	1	0.756984	0.121467	0.083534	0.782303	0.760344	0.828895	1	1	0.696858	0.083534
80866	80864	79464	79454	-	leuC	b0072	3-isopropylmalate dehydratase large subunit	312	401	124	371	276	0.449275	1	0.762223	0.0840296	0.110258	0.755692	0.76314	0.826824	1	1	0.695335	0.0840296
2255199	2255186	2254245	2254226	-	rihB	b2162	ribonucleoside hydrolase 2	33	23	57	35	64	0.890625	1	0.268016	0.35289	0.0841915	0.263641	0.399105	0.17722	1	1	0.648545	0.0841915
	3459817	3461013	3461022	+	gspF	b3327	general secretory pathway component, cryptic	48	31	67	39	67	1	1	0.247868	0.51276	0.0841999	0.369245	0.657324	0.292189	1	1	0.478445	0.0841999
	1551338	1551991	1553889	+	fdnI	b1476	formate dehydrogenase-N, cytochrome B556 (gamma) subunit, nitrate-inducible	37	30	63	40	51	1.23529	1	0.955259	0.473704	0.0841999	0.658944	0.913412	0.618603	1	1	0.462751	0.0841999
1341906	1341921	1342658		+	pyrF	b1281	orotidine-5'-phosphate decarboxylase	106	124	80	73	86	0.930233	1	0.457502	0.240829	0.58606	0.511465	0.213102	0.779199	1	1	0.0842492	0.0842492
4278066			4277927	-	ryjA	b4459	-	48	45	68	50	56	1.21429	1	0.518268	0.493419	0.0844957	0.501111	0.785288	0.719528	1	1	0.420116	0.0844957
3008707	3008764	3009975	3010027	+	ygeY	b2872	putative peptidase	44	40	68	40	62	1.09677	1	0.222656	0.830166	0.0845503	0.372735	0.911152	0.46764	1	1	0.405485	0.0845503
	45463	45750	45806	+	fixX	b0044	putative 4Fe-4S ferredoxin-type protein	50	29	69	50	61	1.13115	1	0.530552	0.240512	0.0845503	0.500963	0.650076	0.617326	1	1	0.929889	0.0845503
2124520	2124520	2123084	2123084	-	cpsB	b2049	mannose-1-phosphate guanyltransferase	63	26	87	65	93	0.935484	1	0.24298	0.117775	0.324026	0.390522	0.0846515	0.494389	1	1	0.459129	0.0846515
2483724	2483755	2484369	2484369	+	evgA	b2369	response regulator in two-component regulatory system with EvgS	52	66	55	42	44	1.25	1	0.450636	0.432394	0.191707	0.501807	0.197644	0.826824	1	1	0.0847569	0.0847569
3839998	3839993	3839175	3838103	-	nlpA	b3661	cytoplasmic membrane lipoprotein-28	120	107	72	89	60	1.2	1	0.66524	0.263648	0.835374	0.598857	0.0849883	0.618603	1	1	0.366145	0.0849883
3331769	3331754	3330582	3330485	-	obgE	b3183	GTPase involved in cell partioning and DNA repair	54	100	70	56	65	1.07692	1	0.268683	0.287158	0.451773	0.390522	0.195178	0.813861	1	1	0.0850729	0.0850729
2347384	2347384	2348514		+	nrdB	b2235	ribonucleoside-diphosphate reductase 1, beta subunit, ferritin-like protein	80	94	60	65	53	1.13208	1	0.459491	0.230238	0.960945	0.935357	0.0851493	0.824359	1	1	0.241276	0.0851493
	2575003	2574302		-	eutQ	b2460	RmlC-like cupin domain protein	28	22	51	33	38	1.34211	1	0.69556	0.380329	0.0851616	0.502971	0.95101	0.746867	1	1	0.588621	0.0851616
2025493	2025511	2026326	2026426	+	yedP	b1955	putative mannosyl-3-phosphoglycerate phosphatase	38	29	81	100	88	0.920455	1	0.18701	0.286705	0.818512	0.0853135	0.29508	0.890108	1	1	0.22243	0.0853135
1401809	1401773	1400247	1400247	-	abgT	b1336	p-aminobenzoyl-glutamate transporter; membrane protein	33	31	67	39	61	1.09836	1	0.0856505	0.477976	0.0963255	0.212789	0.743326	0.446443	1	1	0.490966	0.0856505
1475082	1475144	1477450	1477499	+	ydbD	b1407	PF10971 family putative periplasmic methylglyoxal resistance protein	40	33	74	42	55	1.34545	1	0.0856505	0.259888	0.106407	0.390522	0.519606	0.590592	1	1	0.865105	0.0856505
3967762	3967916	3969019	3969030	+	wecA	b3784	UDP-GlcNAc:undecaprenylphosphate GlcNAc-1-phosphate transferase	92	121	65	72	66	0.984848	1	0.469435	0.13407	0.982471	0.666096	0.0858336	0.923239	1	1	0.147963	0.0858336
3371036	3371036	3370347		-	nanE	b3223	putative N-acetylmannosamine-6-P epimerase	29	14	44	31	26	1.69231	0.502981	0.670459	0.0859499	0.114448	0.606071	0.829648	0.918417	1	1	0.700857	0.0859499
4494576	4494623	4495186	4496237	+	idnK	b4268	D-gluconate kinase, thermosensitive	58	33	83	52	63	1.31746	1	0.321186	0.32271	0.0860088	0.434781	0.929052	0.717642	1	1	0.701288	0.0860088
	2130878	2129661	2129654	-	wcaD	b2056	putative colanic acid polymerase	40	25	67	40	53	1.26415	1	0.211455	0.298949	0.0861737	0.390522	0.787402	0.629647	1	1	0.721813	0.0861737
	3207371	3207976	3207976	+	ttdB	b3062	L-tartrate dehydratase, beta subunit	67	36	85	53	81	1.04938	1	0.345634	0.429445	0.0865303	0.41711	0.708174	0.428535	1	1	0.543586	0.0865303
4412387	4412387	4413025	4413027	+	yjfM	b4185	DUF1190 family protein	65	30	79	49	71	1.11268	1	0.362385	0.306941	0.0865303	0.441987	0.633045	0.504212	1	1	0.726975	0.0865303
2490201	2490186	2489242	2489242	-	yfdV	b2372	putative transporter	42	28	65	40	52	1.25	1	0.274566	0.460496	0.0867469	0.411166	0.95291	0.618619	1	1	0.525017	0.0867469
2687408	2687408	2687070	2686923	-	glnB	b2553	regulatory protein P-II for glutamine synthetase	100	128	67	86	72	0.930556	1	0.582624	0.231896	0.8997	0.794683	0.0867694	0.894536	1	1	0.132587	0.0867694
4540714	4540957	4541559	4541570	+	fimB	b4312	tyrosine recombinase/inversion of on/off regulator of fimA	70	72	71	45	52	1.36538	1	0.433843	0.481983	0.0909586	0.735274	0.251948	0.747953	1	1	0.0867878	0.0867878
4043418	4043418	4044044	4044044	+	dsbA	b3860	periplasmic protein disulfide isomerase I	130	122	66	98	68	0.970588	1	0.949348	0.17104	0.63985	0.645955	0.0868385	0.689619	1	1	0.297745	0.0868385
2106057	2106057	2105065		-	wbbI	b2034	d-Galf:alpha-d-Glc beta-1,6-galactofuranosyltransferase	74	78	61	64	44	1.38636	1	0.423701	0.336695	0.855003	0.963031	0.0869747	0.651333	1	1	0.316314	0.0869747
1420275	1420241	1419765	1419765	-	racR	b1356	Rac prophage; putative DNA-binding transcriptional regulator	88	164	91	159	92	0.98913	1	0.426061	0.179063	0.33673	0.445445	0.0869747	0.45086	1	1	0.430283	0.0869747
1035066	1035066	1035773		+	hyaC	b0974	hydrogenase 1, b-type cytochrome subunit	54	22	77	53	77	1	1	0.309434	0.0869994	0.155939	0.390522	0.126107	0.507384	1	1	0.669841	0.0869994
3070297			3071368	+	-	predicted RNA	antisense: fbaA	629	747	203	472	322	0.630435	1	0.777526	0.0870285	0.33288	0.490958	0.79338	0.828895	1	1	0.712119	0.0870285
1303834	1303834	1304742	1304742	+	oppC	b1245	oligopeptide transporter subunit	226	263	120	203	140	0.857143	1	0.916961	0.0870285	0.18444	0.588219	0.246683	0.590592	1	1	0.491119	0.0870285
939426	939428	940720	940720	+	serS	b0893	seryl-tRNA synthetase, also charges selenocysteinyl-tRNA with serine	209	272	105	185	144	0.729167	1	0.817677	0.0870667	0.255236	0.888599	0.767221	0.904143	1	1	0.726235	0.0870667
348650	348682	349572	349572	+	prpB	b0331	2-methylisocitrate lyase	66	22	78	86	61	1.27869	1	0.303137	0.0957771	0.996491	0.443227	0.405013	0.660283	1	1	0.087202	0.087202
	3615241	3616185		+	nikB	b3477	nickel transporter subunit	40	22	59	37	46	1.28261	1	0.298037	0.313035	0.0872837	0.432899	0.844219	0.662725	1	1	0.725641	0.0872837
1427009	1429049	1432411		+	stfR	b1372	Rac prophage; putative tail fiber protein	33	22	60	39	38	1.57895	1	0.0874184	0.155518	0.227422	0.416201	0.510226	0.932546	1	1	0.626736	0.0874184
3493957	3494011	3496554		+	nirB	b3365	nitrite reductase, large subunit, NAD(P)H-binding	35	26	52	30	42	1.2381	1	0.222656	0.328747	0.0874956	0.421515	0.775712	0.533488	1	1	0.54971	0.0874956
2715412	2715320	2714439	2714226	-	yfiE	b2577	putative DNA-binding transcriptional regulator	34	30	63	39	56	1.125	1	0.259287	0.575877	0.0875381	0.390522	0.965742	0.524749	1	1	0.465008	0.0875381
1647934	1647934	1648341	1648341	+	dicA	b1570	Qin prophage; putative regulator for DicB	90	114	69	107	64	1.07812	1	0.537006	0.291498	0.721198	0.838109	0.0878497	0.526572	1	1	0.366842	0.0878497
3478801	3478792	3478592	3478499	-	yheV	b4551	DUF2387 family putative metal-binding protein	56	71	53	50	51	1.03922	1	0.579298	0.454811	0.246332	0.578862	0.215324	0.818746	1	1	0.088162	0.088162
855790	855744	854824	854808	-	ldtB	b0819	L,D-transpeptidase linking Lpp to murein	119	154	77	156	92	0.836957	1	0.530552	0.0957771	0.0882417	0.497443	0.167062	0.415991	1	1	0.788629	0.0882417
1512811	1512817	1513830		+	ydcT	b1441	putative spermidine/putrescine transporter subunit	33	30	69	69	71	0.971831	1	0.162221	0.481027	0.802466	0.0882687	0.585053	0.908661	1	1	0.69707	0.0882687
568302	568315	568647	568647	+	emrE	b0543	DLP12 prophage; multidrug resistance protein	29	40	49	35	29	1.68966	0.465318	0.49909	0.668329	0.0883511	0.510442	0.244527	0.939079	1	1	0.253334	0.0883511
536533	536586	537464	537464	+	glxR	b0509	tartronate semialdehyde reductase, NADH-dependent	57	28	77	47	74	1.04054	1	0.283654	0.291891	0.0885889	0.390522	0.493077	0.419391	1	1	0.761972	0.0885889
291346	291346	291071		-	insA	b0275	IS1 repressor TnpA	57	119	120	80	70	1.71429	0.485382	0.744608	0.518348	0.0887065	0.501111	0.103759	0.970853	1	1	0.11191	0.0887065
	1047945	1045849	1045849	-	gfcD	b0984	putative O-antigen capsule production periplasmic protein	43	27	62	44	62	1	1	0.225251	0.285763	0.0887065	0.390522	0.315623	0.441025	1	1	0.893457	0.0887065
1588296	1588296	1587793	1587788	-	ydeR	b1503	putative fimbrial-like adhesin protein	59	49	97	61	97	1	1	0.319057	0.660187	0.0888249	0.390522	0.881418	0.368132	1	1	0.44843	0.0888249
913814	913814	912162	912162	-	hcp	b0873	hybrid-cluster [4Fe-2S-2O] protein in anaerobic terminal reductases	40	18	65	46	56	1.16071	1	0.172584	0.0888526	0.27476	0.345132	0.208014	0.739236	1	1	0.512637	0.0888526
3423655			3423580	-	thrV	b3273	Thr tRNA	93	46	102	80	138	0.73913	1	0.557985	0.212825	0.111768	0.497939	0.0889599	0.131408	1	1	0.92064	0.0889599
3072671	3072622	3071459	3071382	-	pgk	b2926	phosphoglycerate kinase	316	405	135	279	197	0.685279	1	0.75744	0.0890427	0.267386	0.504538	0.90808	0.826824	1	1	0.82831	0.0890427
558974	558974	559666	559666	+	sfmC	b0531	putative periplasmic pilus chaperone	40	22	63	40	50	1.26	1	0.400002	0.198063	0.0893977	0.499604	0.620008	0.664709	1	1	0.976952	0.0893977
1726371	1725920	1725681	1725633	-	ydhL	b1648	DUF1289 family protein	26	23	59	43	41	1.43902	0.724899	0.464771	0.13142	0.0895346	0.49621	0.748916	0.898258	1	1	0.806729	0.0895346
1639523	1639334	1639080		-	rzoQ	b4689	putative Rz1-like lipoprotein, Qin prophage	28	28	58	42	42	1.38095	0.800457	0.478655	0.285021	0.0895346	0.497474	0.977768	0.841083	1	1	0.816044	0.0895346
4580067	4579840	4579499	4579446	-	symE	b4347	toxic peptide regulated by antisense sRNA symR	50	37	61	44	50	1.22	1	0.553088	0.671564	0.0895346	0.517855	0.627332	0.719528	1	1	0.398991	0.0895346
3337891	3337891	3337256		-	mlaC	b3192	ABC transporter maintaining OM lipid asymmetry, periplasmic binding protein	106	124	57	101	73	0.780822	1	0.736931	0.0898583	0.367271	0.646639	0.117921	0.718233	1	1	0.319168	0.0898583
3336548	3336494	3335235	3334885	-	murA	b3189	UDP-N-acetylglucosamine 1-carboxyvinyltransferase	135	165	78	115	97	0.804124	1	0.814207	0.0903442	0.374722	0.504157	0.294926	0.866464	1	1	0.393332	0.0903442
887368	887423	887959	887993	+	rcdA	b0846	transcriptional regulator of csgD and ybiJI; autoregulator	49	33	79	50	77	1.02597	1	0.50697	0.378451	0.0909586	0.636774	0.643369	0.424209	1	1	0.622912	0.0909586
3584659	3584759	3585043	3586849	+	yrhB	b3446	stable heat shock chaperone	44	26	46	34	30	1.53333	0.678343	0.569725	0.394864	0.0909947	0.910398	0.612979	0.934034	1	1	0.528886	0.0909947
2121554	2121554	2120160	2120160	-	wcaJ	b2047	colanic biosynthesis UDP-glucose lipid carrier transferase	90	33	109	90	116	0.939655	1	0.297681	0.12247	0.331757	0.390522	0.0910694	0.556658	1	1	0.308727	0.0910694
	3102133	3101807	3101721	-	yggL	b2959	DUF469 family protein	149	162	92	123	92	1	1	0.554619	0.251207	0.970669	0.964488	0.0910694	0.79673	1	1	0.2188	0.0910694
2071519	2071539	2074658	2074658	+	flu	b2000	CP4-44 prophage; antigen 43 (Ag43) phase-variable biofilm formation autotransporter	104	72	121	264	185	0.654054	1	0.897608	0.980569	0.751994	0.401256	0.317923	0.828895	1	1	0.0912333	0.0912333
2077567	2077569	2077943	2077975	+	cbtA	b2005	CP4-44 prophage; toxin of the YeeV-YeeU toxin-antitoxin system	47	36	66	46	67	0.985075	1	0.539687	0.352587	0.0912495	0.500697	0.910245	0.425857	1	1	0.433859	0.0912495
	4284902	4283253	4283212	-	actP	b4067	acetate transporter	120	57	110	162	124	0.887097	1	0.57429	0.286705	0.640694	0.481776	0.248913	0.825307	1	1	0.0915599	0.0915599
1885790	1885845	1886810	1893366	+	yeaX	b1803	putative YeaWX dioxygenase beta subunit, reductase component	33	28	61	41	58	1.05172	1	0.231139	0.542979	0.137857	0.311568	0.831641	0.524749	1	1	0.0917797	0.0917797
1442843	1442843	1441854	1441852	-	ldhA	b1380	fermentative D-lactate dehydrogenase, NAD-dependent	37	30	58	36	50	1.16	1	0.280773	0.726124	0.0918001	0.396713	0.891153	0.548505	1	1	0.439759	0.0918001
245817	245805	245065	244291	-	yafK	b0224	L,D-transpeptidase-related protein	94	188	93	128	119	0.781513	1	0.347146	0.0918023	0.604651	0.377773	0.205273	0.950121	1	1	0.263457	0.0918023
	1203822	1204160	1204234	+	ymfM	b1148	e14 prophage; uncharacterized protein	53	33	74	52	63	1.1746	1	0.539687	0.298259	0.0919404	0.502971	0.814516	0.640439	1	1	0.775076	0.0919404
3380137	3380191	3380589	3380589	+	yhcB	b3233	DUF1043 family inner membrane-anchored protein	212	237	114	217	139	0.820144	1	0.839757	0.091996	0.217547	0.968853	0.104648	0.534556	1	1	0.465008	0.091996
	2810344	2810679	2810769	+	ygaH	b2683	putative L-valine exporter, norvaline resistance protein	54	83	48	55	49	0.979592	1	0.604102	0.30397	0.633632	0.605482	0.0930589	0.981859	1	1	0.0921581	0.0921581
2360152	2360152	2358863	2358863	-	rhmT	b2246	putative L-rhamnonate transporter	40	27	76	45	62	1.22581	1	0.11571	0.226132	0.0923544	0.34329	0.555196	0.578054	1	1	0.87579	0.0923544
539147	539147	540508	540564	+	allB	b0512	allantoinase	39	28	69	41	60	1.15	1	0.160922	0.358974	0.0923544	0.345132	0.699568	0.515098	1	1	0.618918	0.0923544
1031935	1032139	1033257		+	hyaA	b0972	hydrogenase 1, small subunit	44	27	70	42	65	1.07692	1	0.227688	0.325021	0.0923544	0.371141	0.555196	0.446443	1	1	0.695317	0.0923544
3288011	3288090	3288785	3288785	+	yraI	b3143	putative periplasmic pilin chaperone	44	26	58	37	52	1.11538	1	0.383573	0.467984	0.0923544	0.435643	0.875142	0.527532	1	1	0.511363	0.0923544
1455164	1455164	1455910	1455924	+	paaC	b1390	ring 1,2-phenylacetyl-CoA epoxidase subunit	35	24	60	38	52	1.15385	1	0.469851	0.323008	0.0923544	0.889815	0.725194	0.547537	1	1	0.716224	0.0923544
3252279	3252304	3252669	3252669	+	yhaH	b3103	DUF805 family inner membrane protein	48	40	57	41	56	1.01786	1	0.562099	0.990926	0.0923544	0.503212	0.683185	0.508927	1	1	0.340285	0.0923544
	2451075	2450587		-	yfcQ	b2334	putative fimbrial-like adhesin protein	40	18	53	37	48	1.10417	1	0.659674	0.116359	0.0923544	0.507593	0.302981	0.552446	1	1	0.798286	0.0923544
1884634	1884665	1885789	1885789	+	yeaW	b1802	putative YeaWX dioxygenase alpha subunit; 2Fe-2S cluster	44	26	77	46	77	1	1	0.18701	0.229327	0.0926711	0.26902	0.28181	0.297117	1	1	0.878126	0.0926711
3754099	3754099	3752963	3752633	-	yiaV	b3586	membrane fusion protein (MFP) component of efflux pump, signal anchor	55	37	72	43	58	1.24138	1	0.264144	0.637753	0.0926711	0.409059	0.89213	0.616759	1	1	0.447838	0.0926711
2545818	2545609	2544752	2544740	-	murR	b2427	repressor for murPQ, MurNAc 6-P inducible	34	21	55	35	38	1.44737	0.960463	0.33731	0.304076	0.0931314	0.48954	0.99362	0.819243	1	1	0.752237	0.0931314
1862454	1862429	1862016	1861975	-	msrB	b1778	methionine sulfoxide reductase B	183	217	104	192	129	0.806202	1	0.709602	0.0932113	0.263147	0.75889	0.111483	0.600763	1	1	0.415619	0.0932113
531226	531226	530132	529568	-	mnmH	b0503	tRNA 2-selenouridine synthase, selenophosphate-dependent	44	32	73	44	55	1.32727	1	0.222606	0.46593	0.0934956	0.396794	0.974279	0.697926	1	1	0.514876	0.0934956
3499910	3499910	3501247	3501247	+	frlA	b3370	putative fructoselysine transporter	47	22	61	36	44	1.38636	1	0.268683	0.286206	0.0934956	0.435127	0.885032	0.746852	1	1	0.758544	0.0934956
2789979	2789982	2791250	2791250	+	lhgO	b2660	L-2-hydroxyglutarate oxidase	20	19	49	74	49	1	1	0.300281	0.339055	0.474139	0.411571	0.510236	0.569974	1	1	0.0938627	0.0938627
386195	386207	386974		+	tauB	b0366	taurine transporter subunit	47	26	71	45	58	1.22414	1	0.297552	0.296971	0.0939633	0.410826	0.75541	0.621137	1	1	0.77487	0.0939633
	516583	517362	517399	+	fetB	b0491	iron exporter permease subunit, ABC transporter FetAB; peroxide resistance protein	58	36	78	49	62	1.25806	1	0.308902	0.537898	0.0941092	0.439937	0.947714	0.646956	1	1	0.483397	0.0941092
87355	87357	87848	87848	+	ilvH	b0078	acetolactate synthase 3, small subunit, valine-sensitive	132	163	88	120	93	0.946237	1	0.486787	0.168787	0.783782	0.64162	0.0943091	0.792329	1	1	0.241734	0.0943091
176600	176610	176954	176954	+	erpA	b0156	iron-sulfur cluster insertion protein	162	226	104	209	135	0.77037	1	0.515535	0.0945382	0.218965	0.494656	0.12119	0.571539	1	1	0.406329	0.0945382
4337031	4337031	4335694	4335694	-	adiC	b4115	arginine:agmatine antiporter	63	48	85	50	82	1.03659	1	0.254279	0.574481	0.0947616	0.409059	0.689712	0.311304	1	1	0.429111	0.0947616
4382641	4382643	4383620	4383730	+	epmA	b4155	Elongation Factor P Lys34 lysyltransferase	51	50	61	38	55	1.10909	1	0.326405	0.532821	0.0949285	0.421515	0.482855	0.499411	1	1	0.214231	0.0949285
749707	749707	748979		-	ybgP	b0717	putative periplasmic pilin chaperone	23	21	46	30	37	1.24324	1	0.724298	0.4441	0.0951876	0.499604	0.994837	0.659257	1	1	0.52593	0.0951876
2228970	2228982	2229065	2229348	+	yohP	b4679	uncharacterized protein	27	23	54	63	51	1.05882	1	0.479391	0.0952119	0.775354	0.491908	0.226333	0.94211	1	1	0.135012	0.0952119
2638652	2638652	2637474	2637474	-	bamB	b2512	BamABCDE complex OM biogenesis lipoprotein	152	224	100	162	118	0.847458	1	0.563176	0.0952119	0.220003	0.50426	0.294015	0.667883	1	1	0.477737	0.0952119
3275333	3274907	3273573	3273573	-	garP	b3127	putative (D)-galactarate transporter	63	35	90	53	73	1.23288	1	0.237103	0.250247	0.0952132	0.434781	0.574598	0.572679	1	1	0.806729	0.0952132
4419627	4419625	4418561	4418454	-	ulaG	b4192	L-ascorbate 6-phosphate lactonase	60	38	85	50	77	1.1039	1	0.23017	0.464842	0.0953205	0.380234	0.757318	0.479562	1	1	0.511363	0.0953205
3272751	3272751	3271867	3271771	-	garR	b3125	tartronate semialdehyde reductase	47	29	64	40	51	1.2549	1	0.314959	0.509461	0.0953205	0.443227	0.976166	0.655768	1	1	0.503159	0.0953205
	4303078	4301027		-	mdtO	b4081	membrane translocase (MDR) of MdtNOP efflux pump, PET family	58	34	72	42	64	1.125	1	0.284722	0.30397	0.095398	0.432899	0.419138	0.429979	1	1	0.711462	0.095398
2205695	2205695	2207974		+	yehM	b2120	uncharacterized protein	43	19	66	42	59	1.11864	1	0.194164	0.0954138	0.144479	0.390522	0.16232	0.515098	1	1	0.625437	0.0954138
4097545	4097736	4098572	4098645	+	rhaS	b3905	transcriptional activator of rhaBAD and rhaT	57	33	60	38	64	0.9375	1	0.383827	0.835191	0.095481	0.418902	0.932839	0.28408	1	1	0.42516	0.095481
862611	862606	860174	860166	-	ybiW	b0823	putative pyruvate formate lyase	31	25	58	38	56	1.03571	1	0.095547	0.280677	0.15035	0.288967	0.320105	0.46764	1	1	0.965892	0.095547
1924594	1924591	1923719	1923707	-	yebZ	b1840	inner membrane protein	106	125	100	72	107	0.934579	1	0.373694	0.411626	0.287766	0.456063	0.501542	0.515098	1	1	0.095969	0.095969
1344393	1344346	1343597	1343596	-	yciT	b1284	global regulator of transcription; DeoR family	61	85	64	54	53	1.20755	1	0.399149	0.335551	0.374154	0.497443	0.147983	0.899064	1	1	0.095969	0.095969
2306754	2306754	2305108	2305108	-	mqo	b2210	malate dehydrogenase, FAD/NAD(P)-binding domain	109	97	71	52	60	1.18333	1	0.564206	0.344249	0.300548	0.994781	0.236407	0.791535	1	1	0.0959695	0.0959695
2575831	2575805	2575470	2575458	-	eutS	b2462	putative ethanol utilization carboxysome structural protein	28	16	45	34	39	1.15385	1	0.50697	0.0960275	0.101417	0.498601	0.395875	0.738355	1	1	0.694753	0.0960275
4475877	4474053	4473340	4473340	-	bdcA	b4249	c-di-GMP-binding biofilm dispersal mediator protein	50	45	73	46	65	1.12308	1	0.308902	0.973809	0.0962898	0.402809	0.641831	0.528346	1	1	0.390553	0.0962898
349573	350012	351181	351214	+	prpC	b0333	2-methylcitrate synthase	54	20	72	67	45	1.6	0.800457	0.255584	0.0963185	0.731741	0.475323	0.721878	0.595827	1	1	0.237958	0.0963185
3982812	3982958	3984193	3984193	+	aslB	b3800	putative AslA-specific sulfatase-maturating enzyme	37	27	53	33	53	1	1	0.282912	0.717262	0.0963255	0.390134	0.893922	0.368424	1	1	0.441224	0.0963255
969389	969389	970621	970660	+	ycaQ	b0916	DUF1006 family protein with C-terminal wHTH domain	34	32	61	37	55	1.10909	1	0.220495	0.684358	0.0966597	0.369245	0.997177	0.510195	1	1	0.444054	0.0966597
4024888	4024821	4024333	4024280	-	rfaH	b3842	transcription antitermination protein	56	64	45	42	43	1.04651	1	0.671778	0.386433	0.361722	0.489637	0.187457	0.841083	1	1	0.0967817	0.0967817
	1457497	1458264		+	paaF	b1393	2,3-dehydroadipyl-CoA hydratase	70	31	111	70	98	1.13265	1	0.212983	0.0968241	0.138636	0.372735	0.234763	0.574401	1	1	0.750751	0.0968241
1175422	1175427	1176626		+	lolC	b1116	lipoprotein-releasing system transmembrane protein	46	94	57	68	54	1.05556	1	0.300539	0.195441	0.857611	0.397177	0.0971897	0.787053	1	1	0.289065	0.0971897
25702	25826	26275	26275	+	fkpB	b0028	FKBP-type peptidyl-prolyl cis-trans isomerase (rotamase)	90	147	67	104	84	0.797619	1	0.537006	0.11106	0.684879	0.476682	0.0971897	0.836638	1	1	0.194163	0.0971897
2879773	2879772	2878855	2878855	-	ygbT	b2755	multifunctional endonuclease Cas1, CRISPR adaptation protein; DNA repair enzyme	48	32	68	43	53	1.28302	1	0.29508	0.588263	0.0972479	0.435127	0.875142	0.667883	1	1	0.465249	0.0972479
	2505547	2504510	2504510	-	ypdE	b2384	aminopeptidase	38	17	59	40	48	1.22917	1	0.274566	0.0972783	0.166761	0.410649	0.368397	0.746867	1	1	0.686328	0.0972783
3431990	3431962	3431420	3431416	-	yrdD	b3283	putative DNA topoisomerase	73	142	66	132	82	0.804878	1	0.482217	0.0973794	0.21907	0.43791	0.100746	0.527532	1	1	0.406642	0.0973794
4400659	4400672	4401952	4401952	+	hflX	b4173	GTPase, stimulated by 50S subunit binding	139	207	92	182	104	0.884615	1	0.556736	0.0973865	0.135872	0.507778	0.242062	0.515098	1	1	0.982557	0.0973865
1879952	1879948	1879589	1879589	-	yeaR	b1797	DUF1971 family protein, nitrate-inducible	45	29	78	54	82	0.95122	1	0.507917	0.198888	0.0974884	0.496456	0.294446	0.392793	1	1	0.988692	0.0974884
3596403	3596403	3595477		-	livH	b3457	leucine/isoleucine/valine transporter subunit	164	154	84	89	84	1	1	0.92259	0.145837	0.941668	0.783055	0.0976323	0.971222	1	1	0.132838	0.0976323
661379	661378	660425	660301	-	ybeF	b0629	LysR family putative transcriptional regulator	27	28	53	34	52	1.01923	1	0.371792	0.719575	0.0976641	0.458446	0.95541	0.427654	1	1	0.443874	0.0976641
1891267	1891267	1890572	1890547	-	tsaB	b1807	tRNA(ANN) t(6)A37 threonylcarbamoyladenosine modification protein; binding partner and protease for TsaD	64	94	66	59	58	1.13793	1	0.410712	0.3094	0.462465	0.476682	0.148028	0.903242	1	1	0.09777	0.09777
2336792	2336644	2334956		-	yfaA	b2230	DUF2138 family protein, putative host defense protein	40	27	68	40	60	1.13333	1	0.126131	0.277603	0.0978327	0.279745	0.48519	0.468622	1	1	0.738897	0.0978327
501069	499973	499014	499014	-	aes	b0476	acetyl esterase	35	28	71	44	48	1.47917	1	0.187284	0.358269	0.0978327	0.390522	0.938887	0.818697	1	1	0.677631	0.0978327
	2292964	2292407		-	dsbE	b2195	periplasmic thioredoxin of cytochrome c-type biogenesis	49	34	85	55	77	1.1039	1	0.381491	0.332758	0.0978327	0.474657	0.685537	0.524749	1	1	0.713276	0.0978327
4571746	4571751	4571915	4571917	+	yjiS	b4341	DUF1127 family protein	75	83	87	65	78	1.11538	1	0.551567	0.563355	0.0978327	0.540805	0.349299	0.676625	1	1	0.166569	0.0978327
1655673	1655673	1655347	1655258	-	ynfA	b1582	UPF0060 family inner membrane protein	137	54	175	165	199	0.879397	1	0.326405	0.148745	0.654466	0.390522	0.0978383	0.775641	1	1	0.367806	0.0978383
4358696	4358617	4356470	4356412	-	cadA	b4131	lysine decarboxylase, acid-inducible	35	35	55	32	48	1.14583	1	0.18701	0.658461	0.0981968	0.38669	0.977788	0.499411	1	1	0.396261	0.0981968
	587981	587091	587091	-	ybcH	b0567	PRK09936 family protein	36	24	63	40	56	1.125	1	0.249922	0.311862	0.0981968	0.370278	0.66261	0.534556	1	1	0.75571	0.0981968
517493	519733	520419		+	ybbA	b0495	putative ABC superfamily transporter ATP-binding subunit	55	40	85	54	70	1.21429	1	0.278947	0.563813	0.0981968	0.409059	0.963668	0.618603	1	1	0.473308	0.0981968
4426587	4424791	4424516	4424424	-	yjfY	b4199	YhcN family protein, periplasmic	76	51	92	65	80	1.15	1	0.640414	0.574481	0.0981968	0.514078	0.854565	0.638748	1	1	0.432234	0.0981968
	2770681	2771124	2771124	+	yfjS	b2636	CP4-57 prophage; uncharacterized protein	64	41	81	54	69	1.17391	1	0.47179	0.567719	0.0984179	0.502177	0.934314	0.616759	1	1	0.45854	0.0984179
304182	304182	303853	303853	-	ykgJ	b0288	UPF0153 cysteine cluster protein	59	40	71	51	53	1.33962	0.950016	0.567111	0.547828	0.0985	0.585242	0.630293	0.815266	1	1	0.441224	0.0985
1287328			1287244	-	tyrV	b1230	Tyr tRNA	207	250	159	177	181	0.878453	1	0.620193	0.361234	0.4982	0.684779	0.209247	0.828895	1	1	0.0986229	0.0986229
1101706	1101684	1100851	1097805	-	csgG	b1037	curli production assembly/transport outer membrane lipoprotein	46	34	77	48	70	1.1	1	0.246424	0.482972	0.0987057	0.384399	0.816514	0.515098	1	1	0.525099	0.0987057
2662143	2662131	2661643	2661532	-	iscR	b2531	isc operon transcriptional repressor; suf operon transcriptional activator; oxidative stress- and iron starvation-inducible; autorepressor	156	176	130	264	189	0.687831	1	0.426061	0.307649	0.0987057	0.408627	0.75372	0.662731	1	1	0.770239	0.0987057
1049828	1049833	1050108		+	insA	b4516	IS1 repressor TnpA	78	144	108	93	97	1.1134	1	0.653394	0.39369	0.308041	0.510442	0.201659	0.831908	1	1	0.0990778	0.0990778
495090	495120	496994	497086	+	htpG	b0473	protein refolding molecular co-chaperone Hsp90, Hsp70-dependent; heat-shock protein; ATPase	117	98	61	75	50	1.22	1	0.870603	0.268357	0.696982	0.48379	0.0998629	0.561334	1	1	0.413891	0.0998629
	970852	971598	971712	+	kdsB	b0918	3-deoxy-manno-octulosonate cytidylyltransferase	106	119	63	88	69	0.913043	1	0.653946	0.142101	0.694824	0.957128	0.100031	0.791301	1	1	0.262076	0.100031
2811326	2811427	2812599	2812615	+	emrA	b2685	multidrug efflux system	51	61	50	38	48	1.04167	1	0.369304	0.359262	0.274877	0.439937	0.288853	0.688312	1	1	0.10018	0.10018
580742	580445	580251	580251	-	ylcI	b4589	DUF3950 family protein, DLP12 prophage	31	114	130	93	102	1.27451	1	0.385365	0.572571	0.100315	0.444007	0.366202	0.776407	1	1	0.218573	0.100315
1986840	1986925	1987428	1987990	+	ftnB	b1902	ferritin B, putative ferrous iron reservoir	22	20	51	36	36	1.41667	0.848369	0.469851	0.224293	0.100357	0.496948	0.897551	0.845582	1	1	0.977498	0.100357
1655747	1655808	1656149	1656149	+	ynfB	b1583	UPF0482 family putative periplasmic protein	89	102	72	84	60	1.2	1	0.606327	0.378586	0.758787	0.905655	0.100775	0.745679	1	1	0.260968	0.100775
2847414	2847412	2846489	2846489	-	hycD	b2722	hydrogenase 3, membrane subunit	54	20	72	54	59	1.22034	1	0.287878	0.100843	0.305022	0.417677	0.350244	0.831908	1	1	0.5065	0.100843
1966392	1966191	1965043		-	flhB	b1880	flagellin export apparatus, substrate specificity protein	65	114	71	64	73	0.972603	1	0.321186	0.217519	0.672508	0.409059	0.206755	0.819243	1	1	0.100845	0.100845
233956	233955	232597	232579	-	mltD	b0211	putative membrane-bound lytic murein transglycosylase D	224	398	127	367	148	0.858108	1	0.507122	0.101288	0.126119	0.712833	0.349299	0.581833	1	1	0.694753	0.101288
3024346	3024351	3025751	3025765	+	xanQ	b2882	xanthine permease	40	34	65	39	52	1.25	1	0.190397	0.677591	0.101417	0.389775	0.875142	0.618603	1	1	0.440169	0.101417
2265331	2265295	2265041	2264952	-	yeiW	b4502	UPF0153 cysteine cluster protein	44	46	75	56	77	0.974026	1	0.499979	0.600137	0.101417	0.492265	0.995146	0.478354	1	1	0.414641	0.101417
3927003	3927003	3926545	3926513	-	asnC	b3743	transcriptional activator of asnA; autorepressor	48	35	60	42	56	1.07143	1	0.63856	0.698157	0.101417	0.514039	0.888533	0.541638	1	1	0.419063	0.101417
579743	579880	580086	580344	+	ybcW	b0559	DLP12 prophage; uncharacterized protein	20	153	125	111	90	1.38889	0.896749	0.221196	0.458304	0.319246	0.436059	0.101704	0.859131	1	1	0.170694	0.101704
3888262	3883729	3882326	3882326	-	dnaA	b3702	chromosomal replication initiator protein DnaA, DNA-binding transcriptional dual regulator	94	133	66	99	69	0.956522	1	0.482845	0.101706	0.337581	0.498601	0.12119	0.621201	1	1	0.406049	0.101706
3637666	3637410	3636208	3636051	-	yhiN	b3492	putative oxidoreductase	73	64	83	50	72	1.15278	1	0.312858	0.990592	0.101738	0.462773	0.719944	0.527532	1	1	0.27563	0.101738
2362387	2362211	2361429	2361415	-	rhmR	b2248	putative DNA-binding transcriptional regulator for the rhm operon	41	25	58	38	55	1.05455	1	0.326405	0.415137	0.101826	0.390522	0.724702	0.484572	1	1	0.599492	0.101826
1526106	1525980	1524481	1523240	-	ansP	b1453	L-asparagine transporter	35	37	68	43	48	1.41667	1	0.101837	0.622828	0.150327	0.384399	0.696547	0.828895	1	1	0.468446	0.101837
2629010	2628938	2626695	2626460	-	yfgF	b2503	cyclic-di-GMP phosphodiesterase, anaerobic	35	25	58	35	54	1.07407	1	0.167199	0.284617	0.101858	0.371141	0.371741	0.405892	1	1	0.751656	0.101858
2257428	2257335	2256085	2256085	-	psuT	b2164	putative nucleoside transporter	36	27	64	39	56	1.14286	1	0.20084	0.4441	0.101858	0.371141	0.814522	0.533534	1	1	0.546888	0.101858
	2849241	2847415	2847415	-	hycC	b2723	hydrogenase 3, membrane subunit	59	21	72	58	63	1.14286	1	0.278844	0.102073	0.40677	0.435127	0.176269	0.828106	1	1	0.348634	0.102073
	4608185	4608631	4608637	+	rimI	b4373	ribosomal-protein-S18-alanine N-acetyltransferase	76	116	76	74	74	1.02703	1	0.462681	0.30757	0.54421	0.452823	0.168075	0.876203	1	1	0.102272	0.102272
1453927	1453927	1454856	1454856	+	paaA	b1388	ring 1,2-phenylacetyl-CoA epoxidase subunit	34	25	64	40	57	1.12281	1	0.229286	0.373699	0.102338	0.345215	0.719304	0.524757	1	1	0.677631	0.102338
2618780	2618776	2618075	2617584	-	hda	b2496	ATPase regulatory factor involved in DnaA inactivation	101	143	79	100	84	0.940476	1	0.436349	0.150207	0.812174	0.472005	0.102453	0.831908	1	1	0.242544	0.102453
4374234	4374234	4373365	4370624	-	yjeJ	b4145	uncharacterized protein	37	44	55	35	39	1.41026	1	0.311725	0.55301	0.102526	0.43791	0.381011	0.800711	1	1	0.257347	0.102526
4277072	4277469	4277933	4277974	+	soxR	b4063	redox-sensitive transcriptional activator of soxS; autorepressor	67	48	92	60	63	1.46032	0.960463	0.356605	0.693826	0.102965	0.475323	0.554131	0.828895	1	1	0.448382	0.102965
1506159	1506080	1504905	1502433	-	ydcO	b1433	BenE family inner membrane putative transporter	44	39	72	43	64	1.125	1	0.204642	0.708828	0.103168	0.371141	0.978025	0.52183	1	1	0.436616	0.103168
1629164	1629215	1629418	1629425	+	ydfZ	b1541	selenoprotein, function unknown	56	53	67	51	63	1.06349	1	0.544419	0.944665	0.103309	0.504157	0.483344	0.63168	1	1	0.276705	0.103309
4560914	4560930	4561484	4561674	+	kptA	b4331	RNA 2'-phosphotransferase	50	37	77	50	64	1.20312	1	0.410712	0.503816	0.10346	0.498601	0.915985	0.642158	1	1	0.46911	0.10346
3799312	3799312	3798239	3797290	-	waaU	b3623	lipopolysaccharide core biosynthesis	39	51	52	36	29	1.7931	0.541503	0.323196	0.476776	0.15618	0.721028	0.103671	0.882606	1	1	0.162205	0.103671
1081906	1082243	1083370	1083370	+	efeO	b1018	inactive ferrous ion transporter EfeUOB	105	133	78	86	72	1.08333	1	0.454271	0.195968	0.96989	0.651676	0.103671	0.836638	1	1	0.232773	0.103671
940925	940959	943403	943403	+	dmsA	b0894	dimethyl sulfoxide reductase, anaerobic, subunit A	31	23	57	35	61	0.934426	1	0.103829	0.268858	0.115677	0.164937	0.248913	0.258286	1	1	0.892491	0.103829
	3029012	3028524	3028321	-	ygfS	b2886	putative 4Fe-4S ferredoxin-type oxidoreductase subunit	62	47	79	52	73	1.08219	1	0.404872	0.928368	0.104197	0.443227	0.770129	0.524757	1	1	0.412999	0.104197
196546	196546	197898	197898	+	rseP	b0176	inner membrane zinc RIP metalloprotease; RpoE activator, by degrading RseA; cleaved signal peptide endoprotease	95	158	76	110	83	0.915663	1	0.444651	0.104631	0.38141	0.473385	0.197354	0.756401	1	1	0.403301	0.104631
	578327	578509	578509	+	rzoD	b4510	DLP12 prophage; putative lipoprotein	72	153	110	103	102	1.07843	1	0.515048	0.409324	0.339301	0.499604	0.179655	0.874161	1	1	0.104666	0.104666
3265038	3265017	3263686	3263686	-	tdcC	b3116	L-threonine/L-serine transporter	45	39	73	43	57	1.2807	1	0.187284	0.657549	0.104769	0.390522	0.861314	0.646956	1	1	0.441224	0.104769
3273572	3273557	3272787	3272752	-	garL	b3126	alpha-dehydro-beta-deoxy-D-glucarate aldolase	41	22	57	37	48	1.1875	1	0.343495	0.318925	0.104884	0.421515	0.779651	0.621216	1	1	0.753692	0.104884
2323447	2323447	2324109		+	atoD	b2221	acetyl-CoA:acetoacetyl-CoA transferase, alpha subunit	58	30	85	55	75	1.13333	1	0.297552	0.2651	0.104954	0.405298	0.5614	0.550995	1	1	0.878126	0.104954
1016483	1018485	1018937	1018957	+	matP	b0956	Ter macrodomain organizer matS-binding protein	42	42	69	47	51	1.35294	1	0.689679	0.926066	0.104954	0.504538	0.519442	0.793958	1	1	0.406642	0.104954
4097448	4097448	4095979		-	rhaB	b3904	rhamnulokinase	37	30	54	33	51	1.05882	1	0.244227	0.764193	0.104993	0.384399	0.972081	0.440018	1	1	0.429656	0.104993
799582	800759	801811	801867	+	ybhH	b0769	putative PrpF family isomerase	18	18	45	29	40	1.125	1	0.722502	0.368585	0.104993	0.496948	0.755997	0.542784	1	1	0.672976	0.104993
2512618	2513042	2514244	2514273	+	nupC	b2393	nucleoside (except guanosine) transporter	111	111	66	89	62	1.06452	1	0.714423	0.190716	0.599519	0.93327	0.105094	0.638748	1	1	0.401834	0.105094
	2370018	2370908		+	arnD	b2256	undecaprenyl phosphate-alpha-L-ara4FN deformylase	34	26	55	36	52	1.05769	1	0.308902	0.550554	0.105098	0.390522	0.870214	0.484572	1	1	0.481353	0.105098
2982182	2982182	2980764	2980730	-	araE	b2841	arabinose transporter	39	39	63	38	52	1.21154	1	0.199475	0.875941	0.105199	0.38669	0.736396	0.59902	1	1	0.399517	0.105199
	1377884	1380151		+	ycjT	b1316	putative family 65 glycosyl hydrolase	60	28	87	66	88	0.988636	1	0.24376	0.105377	0.366484	0.372735	0.108178	0.618603	1	1	0.307921	0.105377
1600287	1600209	1598617	1598556	-	lsrK	b1511	autoinducer-2 (AI-2) kinase	46	39	82	55	77	1.06494	1	0.105625	0.311693	0.186239	0.265234	0.446799	0.534556	1	1	0.869487	0.105625
[truncated: 2,691 more rows]

## Sheet: All q < 0.05
Name	Product
-	-
-	-
arpA	ankyrin repeat protein
yjbB	putative Na+/Pi-cotransporter
rluF	23S rRNA pseudouridine(2604) synthase
iclR	transcriptional repressor
pepE	(alpha)-aspartyl dipeptidase
-	antisense: lysC
yjbD	DUF3811 family protein
lysC	lysine-sensitive aspartokinase 3
metH	homocysteine-N5-methyltetrahydrofolate transmethylase, B12-dependent
aceK	isocitrate dehydrogenase kinase/phosphatase
pgi	glucosephosphate isomerase
-	-
ynbG	uncharacterized protein
aceA	isocitrate lyase
rseX	-
ydcD	uncharacterized protein
yhhH	putative immunity protein for putative polymorphic toxin RhsB
yagF	CP4-6 prophage; dehydratase family protein
ybfC	putative periplasmic protein
yjcF	pentapeptide repeats protein
sokA	-
yagM	CP4-6 prophage; uncharacterized protein
yibG	TPR-like repeat protein
ymfE	e14 prophage; putative inner membrane protein
yibA	HEAT-domain lethality reduction protein; putative immunity protein for putative polymorphic toxin RhsA
rpiB	ribose 5-phosphate isomerase B/allose 6-phosphate isomerase
yncH	IPR020099 family protein
yagH	CP4-6 prophage; putative xylosidase/arabinosidase
yagL	CP4-6 prophage; DNA-binding protein
ybbC	putative immunity protein
psaA	-
yqeL	uncharacterized protein
dapB	dihydrodipicolinate reductase
yhhZ	putative Hcp1 family polymorphic toxin protein; putative colicin-like DNase/tRNase activity
phnM	ribophosphonate triphosphate hydrolase
argF	ornithine carbamoyltransferase 2, chain F; CP4-6 prophage
phnG	ribophosphonate triphosphate synthase subunit
-	antisense: cheY
ythA	uncharacterized protein
ryfD	-
-	antisense: ryfD
appY	global transcriptional activator; DLP12 prophage
rprA	-
yagG	CP4-6 prophage; putative sugar transporter
yjbS	uncharacterized protein
phnN	ribose 1,5-bisphosphokinase
tdcR	L-threonine dehydratase operon activator protein
ygeG	SycD-like chaperone family TPR-repeat-containing protein
phnH	ribophosphonate triphosphate synthase subunit
ybfK	uncharacterized protein
ymfD	e14 prophage; putative SAM-dependent methyltransferase
